# Supplementary material for: Murine host response to Neisseria gonorrhoeae upper genital tract infection reveals a common transcriptional signature, plus distinct inflammatory responses that vary between reproductive cycle phases
Source: BMC Genomics. 2018 Aug 22;19:627. doi: 10.1186/s12864-018-5000-7 (PMC6106831; doi:10.1186/s12864-018-5000-7)
Supplement: Supplementary file 1 — This file contains the full, analyzed data set including results of all moderated t-tests as well as raw log2 expression values for all gene probes. (XLSX 22480 kb) [file 12864_2018_5000_MOESM1_ESM.xlsx]

## Sheet: Wetzler_PBS_Ng_6h
							phase				treatment				phase:treatment				estrus, Ng vs PBS					diestrus, Ng vs PBS					PBS, diestrus vs estrus					Ng, diestrus vs estrus					log2 (expression)
Brainarray probeset ID	Mouse Entrez Gene ID	Human Entrez Gene ID	Symbol	Description	GO Term(s)	KEGG Pathway(s)	t	p	FDR q (all)	FDR q (filtered)	t	p	FDR q (all)	FDR q (filtered)	t	p	FDR q (all)	FDR q (filtered)	fold change	t	p	FDR q (all)	FDR q (filtered)	fold change	t	p	FDR q (all)	FDR q (filtered)	fold change	t	p	FDR q (all)	FDR q (filtered)	fold change	t	p	FDR q (all)	FDR q (filtered)	estrus PBS 1	estrus PBS 2	estrus PBS 3	estrus Ng 4	estrus Ng 5	estrus Ng 6	estrus Ng 7	diestrus PBS 12	diestrus PBS 13	diestrus PBS 14	diestrus PBS 15
217169_at	217169	84951	Tns4	tensin 4	GO:0003674: molecular_function, GO:0003779: actin binding, GO:0005737: cytoplasm, GO:0005856: cytoskeleton, GO:0005925: focal adhesion, GO:0006915: apoptotic process, GO:0008104: protein localization, GO:0030054: cell junction		-2.78515	0.0127639	0.0324408	0.0243979	-3.62896	0.00209688	0.120514	0.0825877	7.81868	7.62398e-07	0.019217	0.0113094	-5.04491	-10.2184	9.40204e-07	0.0118494	0.00697349	-1.05037	-0.479365	0.64153	0.86085	0.846363	-4.3152	-13.9313	8.37956e-08	2.13939e-05	1.25905e-05	1.11303	0.85017	0.413135	0.586014	0.535142	5.92137	5.75771	6.10341	3.00732	3.65222	3.42644	4.09796	3.90746	3.92067	3.9596	3.45686
21946_at	21946	8993	Pglyrp1	peptidoglycan recognition protein 1	GO:0002221: pattern recognition receptor signaling pathway, GO:0005125: cytokine activity, GO:0005576: extracellular region, GO:0005615: extracellular space, GO:0005737: cytoplasm, GO:0006915: apoptotic process, GO:0008270: zinc ion binding, GO:0008745: N-acetylmuramoyl-L-alanine amidase activity, GO:0009253: peptidoglycan catabolic process, GO:0016019: peptidoglycan receptor activity, GO:0016019…		-12.1219	9.47563e-10	1.15821e-07	6.81621e-08	3.41026	0.00336381	0.142024	0.0982259	6.6019	6.18964e-06	0.0707334	0.0416274	-1.05696	-0.530193	0.607101	0.908221	0.871428	3.23051	9.1731	2.49291e-06	0.00796032	0.00468473	-15.468	-31.4025	3.35046e-11	2.81505e-07	1.65669e-07	-4.53007	-10.5375	3.92542e-07	9.02281e-05	5.31002e-05	9.11791	9.01657	9.29899	9.23838	9.2375	8.63213	9.08867	5.17702	5.25906	5.33937	4.99436
14962_at	14962	629	Cfb	complement factor B	GO:0003824: catalytic activity, GO:0004252: serine-type endopeptidase activity, GO:0005576: extracellular region, GO:0005615: extracellular space, GO:0006508: proteolysis, GO:0006956: complement activation, GO:0006957: complement activation, alternative pathway, GO:0006957: complement activation, alternative pathway, GO:0008233: peptidase activity, GO:0008236: serine-type peptidase activity, GO:0…	04610: Complement and coagulation cascades, 05150: Staphylococcus aureus infection	-8.66331	1.29058e-07	3.68825e-06	2.19045e-06	3.80503	0.00143265	0.10268	0.0681758	6.43244	8.41864e-06	0.0707334	0.0416274	1.02588	0.0583479	0.954576	0.993332	0.989273	6.28555	9.35154	2.07898e-06	0.00796032	0.00468473	-25.3473	-17.3599	1.03817e-08	8.21228e-06	4.83301e-06	-4.13701	-8.0291	5.83633e-06	0.0003831	0.000228433	10.2283	9.70103	10.2731	10.4998	10.3552	9.58549	9.88528	4.94361	5.9431	5.67405	4.83882
19215_at	19215	5730	Ptgds	prostaglandin D2 synthase (brain)	GO:0001516: prostaglandin biosynthetic process, GO:0001516: prostaglandin biosynthetic process, GO:0004667: prostaglandin-D synthase activity, GO:0004667: prostaglandin-D synthase activity, GO:0005215: transporter activity, GO:0005501: retinoid binding, GO:0005501: retinoid binding, GO:0005504: fatty acid binding, GO:0005576: extracellular region, GO:0005576: extracellular region, GO:0005615: ext…	00590: Arachidonic acid metabolism, 01100: Metabolic pathways	-3.21317	0.00514133	0.0160268	0.0113441	-1.56007	0.13731	0.499914	0.429915	5.93167	2.13762e-05	0.0755564	0.050765	-1.73459	-4.93661	0.000523854	0.143525	0.0893202	1.18702	2.45569	0.0329234	0.397428	0.339954	-2.091	-9.92095	1.92803e-06	0.000126229	7.46748e-05	-1.01554	-0.0657517	0.948741	0.969747	0.963683	4.06787	4.15845	4.16535	3.29501	3.03462	3.64161	3.31032	3.16051	2.97798	3.1351	2.98486
66198_at	66198	284486	Them5	thioesterase superfamily member 5	GO:0003674: molecular_function, GO:0005739: mitochondrion, GO:0008150: biological_process, GO:0008152: metabolic process, GO:0016787: hydrolase activity		7.33734	1.21668e-06	2.06879e-05	1.23329e-05	0.702296	0.492074	0.783922	0.741359	5.87411	2.38445e-05	0.0755564	0.050765	-1.78155	-5.90413	0.000127914	0.0976953	0.0592089	2.27693	4.13411	0.00184077	0.164796	0.117095	2.04338	8.9789	4.70749e-06	0.000207806	0.000122942	8.28891	11.1772	2.14584e-07	6.67752e-05	3.92979e-05	3.54586	3.74841	3.7539	2.70591	2.82573	2.97184	2.89452	4.7161	4.82283	4.74698	4.57007
11727_at	11727	283	Ang	angiogenin, ribonuclease, RNase A family, 5	GO:0001525: angiogenesis, GO:0001666: response to hypoxia, GO:0001938: positive regulation of endothelial cell proliferation, GO:0003676: nucleic acid binding, GO:0003723: RNA binding, GO:0003779: actin binding, GO:0004518: nuclease activity, GO:0004519: endonuclease activity, GO:0004522: pancreatic ribonuclease activity, GO:0004540: ribonuclease activity, GO:0004540: ribonuclease activity, GO:00…		-1.39774	0.180306	0.261616	0.238404	-0.249568	0.805935	0.932934	0.916813	5.86513	2.42558e-05	0.0755564	0.050765	-1.9497	-4.20358	0.00166495	0.187351	0.123489	1.66569	4.76478	0.00067078	0.0989026	0.064589	-2.45826	-7.48549	2.28665e-05	0.000525677	0.000313366	1.32109	2.11064	0.0582095	0.166296	0.1246	5.05314	4.5865	4.87745	3.51715	3.57812	3.71558	4.50508	3.90032	3.45073	3.2176	3.56239
20304_at	20304	6352	Ccl5	chemokine (C-C motif) ligand 5	GO:0000165: MAPK cascade, GO:0002230: positive regulation of defense response to virus by host, GO:0004435: phosphatidylinositol phospholipase C activity, GO:0004672: protein kinase activity, GO:0005125: cytokine activity, GO:0005576: extracellular region, GO:0005615: extracellular space, GO:0005737: cytoplasm, GO:0006468: protein phosphorylation, GO:0006816: calcium ion transport, GO:0006874: ce…	04060: Cytokine-cytokine receptor interaction, 04062: Chemokine signaling pathway, 04620: Toll-like receptor signaling pathway, 04621: NOD-like receptor signaling pathway, 04623: Cytosolic DNA-sensing pathway, 05020: Prion diseases, 05142: Chagas disease (American trypanosomiasis), 05323: Rheumatoid arthritis	3.79928	0.00145056	0.00585287	0.00387915	5.95893	1.60674e-05	0.00910559	0.00541691	5.69756	3.34328e-05	0.0755564	0.050765	1.74482	3.59067	0.00462006	0.246418	0.162625	8.4131	10.6488	6.00891e-07	0.00504869	0.00297121	1.05051	0.344497	0.737717	0.808661	0.792441	5.06529	7.57526	1.01682e-05	0.000553554	0.000329313	3.93913	3.8038	4.06282	4.51835	4.22119	4.97739	5.08677	4.26644	3.98294	3.6059	4.10615
723818_at	723818		Mir135b	microRNA 135b			-3.48205	0.00288083	0.0101858	0.00696565	-0.471344	0.643435	0.864337	0.830466	5.64922	3.67007e-05	0.0755564	0.050765	-1.77944	-3.76935	0.00341571	0.228373	0.149465	1.41843	4.97796	0.000482862	0.0795492	0.0515308	-2.66515	-7.10261	3.5606e-05	0.000694647	0.000415235	-1.05592	-0.579924	0.573511	0.718735	0.680107	4.26395	3.46744	3.49276	2.97389	2.77529	2.89121	3.16947	2.56154	2.38055	2.29519	2.25038
14128_at	14128	2208	Fcer2a	Fc receptor, IgE, low affinity II, alpha polypeptide	GO:0002925: positive regulation of humoral immune response mediated by circulating immunoglobulin, GO:0009897: external side of plasma membrane, GO:0016020: membrane, GO:0016021: integral to membrane, GO:0019863: IgE binding, GO:0030246: carbohydrate binding, GO:0046872: metal ion binding, GO:0051000: positive regulation of nitric-oxide synthase activity, GO:0051712: positive regulation of killin…	04640: Hematopoietic cell lineage	-1.72089	0.103561	0.168582		1.5454	0.140805	0.504886		5.56224	4.34397e-05	0.0755564		-1.27116	-1.96658	0.0764495	0.535222		1.72855	6.90253	3.30958e-05	0.0204868		-1.88477	-6.36466	8.78098e-05	0.00125047		1.16579	1.58553	0.14081	0.2947		2.69432	3.05593	3.0884	2.5296	2.33101	2.93074	2.58568	2.17082	2.1867	1.83386	1.94806
404315_at	404315	284383	Olfr372	olfactory receptor 372	GO:0004871: signal transducer activity, GO:0004930: G-protein coupled receptor activity, GO:0004984: olfactory receptor activity, GO:0007165: signal transduction, GO:0007186: G-protein coupled receptor signaling pathway, GO:0007608: sensory perception of smell, GO:0016021: integral to membrane, GO:0050911: detection of chemical stimulus involved in sensory perception of smell	04740: Olfactory transduction	-0.842172	0.411475	0.504438		0.197978	0.845429	0.946678		5.54544	4.48825e-05	0.0755564		-1.56228	-3.8088	0.00319687	0.220978		1.57159	4.13097	0.00185027	0.164796		-1.80814	-6.78551	5.20498e-05	0.000899223		1.3579	2.38156	0.0361432	0.121341		1.9198	2.2379	2.05045	1.1191	1.63777	1.30338	1.60329	1.1867	1.14583	1.11678	1.4144
12654_at	12654	1116	Chi3l1	chitinase 3-like 1	GO:0003824: catalytic activity, GO:0004553: hydrolase activity, hydrolyzing O-glycosyl compounds, GO:0004568: chitinase activity, GO:0005576: extracellular region, GO:0005615: extracellular space, GO:0005737: cytoplasm, GO:0005783: endoplasmic reticulum, GO:0005975: carbohydrate metabolic process, GO:0006032: chitin catabolic process, GO:0007250: activation of NF-kappaB-inducing kinase activity, …	00520: Amino sugar and nucleotide sugar metabolism	-5.57872	3.42432e-05	0.0002787	0.000169039	6.19477	1.01449e-05	0.00722858	0.00425409	5.51537	4.75898e-05	0.0755564	0.050765	2.4177	3.42755	0.00610385	0.263448	0.178237	22.5671	12.1129	1.71158e-07	0.00270605	0.00159254	-19.908	-17.9347	7.60133e-09	8.21228e-06	4.83301e-06	-2.13282	-2.77475	0.0178848	0.0763557	0.0517462	6.88642	7.78758	7.69104	8.88855	7.63815	9.18595	8.97789	3.63227	2.96492	3.1286	2.92761
12870_at	12870	1356	Cp	ceruloplasmin	GO:0004322: ferroxidase activity, GO:0005507: copper ion binding, GO:0005507: copper ion binding, GO:0005576: extracellular region, GO:0005615: extracellular space, GO:0005615: extracellular space, GO:0006810: transport, GO:0006811: ion transport, GO:0006825: copper ion transport, GO:0016491: oxidoreductase activity, GO:0046658: anchored to plasma membrane, GO:0046688: response to copper ion, GO:…	00860: Porphyrin and chlorophyll metabolism	-3.23923	0.00486154	0.0153559	0.0108364	3.74661	0.00162565	0.10675	0.0723874	5.49733	4.92945e-05	0.0755564	0.050765	1.00891	0.232677	0.820523	0.969501	0.954246	4.50883	7.92197	9.68627e-06	0.0122076	0.00756243	-4.49185	-7.75268	1.69504e-05	0.000443668	0.00026412	-1.00511	-0.237828	0.816334	0.888488	0.869497	8.51781	9.42721	8.8468	9.01358	9.24262	8.94705	8.72237	7.47477	6.66723	6.39602	6.42783
15565_at	15565	3362	Htr6	5-hydroxytryptamine (serotonin) receptor 6	GO:0004871: signal transducer activity, GO:0004930: G-protein coupled receptor activity, GO:0004993: serotonin receptor activity, GO:0005886: plasma membrane, GO:0007165: signal transduction, GO:0007186: G-protein coupled receptor signaling pathway, GO:0007187: G-protein coupled receptor signaling pathway, coupled to cyclic nucleotide second messenger, GO:0007210: serotonin receptor signaling pat…	04020: Calcium signaling pathway, 04080: Neuroactive ligand-receptor interaction	-1.78612	0.0920679	0.153605	0.133686	-1.02007	0.322106	0.674759	0.620564	5.48137	5.08555e-05	0.0755564	0.050765	-1.71062	-4.38691	0.00123819	0.18216	0.119185	1.28061	2.974	0.013298	0.332564	0.276399	-1.88747	-7.06385	3.72737e-05	0.000715594	0.000428311	1.16062	1.38258	0.193888	0.362333	0.306527	3.90399	3.69199	4.16523	3.38741	2.85799	3.08865	3.24865	2.98771	2.99138	3.04531	3.04249
12759_at	12759	1191	Clu	clusterin	GO:0005576: extracellular region, GO:0005615: extracellular space, GO:0005634: nucleus, GO:0005737: cytoplasm, GO:0005739: mitochondrion, GO:0005783: endoplasmic reticulum, GO:0006916: anti-apoptosis, GO:0008219: cell death, GO:0008284: positive regulation of cell proliferation, GO:0008629: induction of apoptosis by intracellular signals, GO:0016020: membrane, GO:0016235: aggresome, GO:0030426: g…		-3.36178	0.00373451	0.0125224	0.00868933	-1.32232	0.203713	0.572312	0.508818	5.47659	5.13331e-05	0.0755564	0.050765	-2.41951	-6.31089	7.35149e-05	0.0926241	0.0547931	1.35738	2.1201	0.0587897	0.440146	0.389972	-3.44558	-8.21793	1.02464e-05	0.000327753	0.00019387	-1.04914	-0.384565	0.707802	0.815949	0.78713	10.6034	10.22	10.035	8.59325	9.12928	9.00702	9.30396	8.29817	9.02502	8.08213	8.50319
258739_at	258739		Olfr1362	olfactory receptor 1362	GO:0004871: signal transducer activity, GO:0004930: G-protein coupled receptor activity, GO:0004984: olfactory receptor activity, GO:0007165: signal transduction, GO:0007186: G-protein coupled receptor signaling pathway, GO:0007608: sensory perception of smell, GO:0016021: integral to membrane, GO:0050911: detection of chemical stimulus involved in sensory perception of smell	04740: Olfactory transduction	-0.478807	0.638224	0.71166		0.127396	0.900133	0.966483		5.43491	5.56966e-05	0.0755564		-1.42634	-3.4806	0.0055738	0.257313		1.38969	3.86279	0.00288788	0.19943		-1.51704	-4.57839	0.00105445	0.00695408		1.30661	2.8921	0.0144821	0.0662618		3.09563	3.13923	3.21241	2.83025	2.42387	2.73095	2.5297	2.35043	2.35817	2.71394	2.72579
17064_at	17064	22918	Cd93	CD93 antigen	GO:0001849: complement component C1q binding, GO:0005509: calcium ion binding, GO:0005886: plasma membrane, GO:0005886: plasma membrane, GO:0007155: cell adhesion, GO:0009986: cell surface, GO:0016020: membrane, GO:0016021: integral to membrane, GO:0016023: cytoplasmic membrane-bounded vesicle, GO:0016337: cell-cell adhesion, GO:0016337: cell-cell adhesion, GO:0030246: carbohydrate binding		11.4705	2.18641e-09	1.90037e-07	1.11839e-07	-2.99309	0.00822775	0.191179	0.136191	5.2496	8.02621e-05	0.0879796	0.0595434	-1.76961	-5.36083	0.00027775	0.116683	0.0698328	1.00111	0.0396537	0.969115	0.990198	0.988654	1.98563	7.91309	1.4214e-05	0.000403465	0.00023933	3.51768	15.6932	6.05745e-09	6.94019e-06	4.08438e-06	6.05099	5.70741	5.69892	5.12729	4.95047	5.07374	4.85376	6.84619	6.75572	6.93414	6.72781
14873_at	14873	9446	Gsto1	glutathione S-transferase omega 1	GO:0004364: glutathione transferase activity, GO:0005604: basement membrane, GO:0005737: cytoplasm, GO:0005829: cytosol, GO:0008152: metabolic process, GO:0016491: oxidoreductase activity, GO:0016740: transferase activity, GO:0019852: L-ascorbic acid metabolic process, GO:0019853: L-ascorbic acid biosynthetic process, GO:0030424: axon, GO:0031965: nuclear membrane, GO:0042178: xenobiotic cataboli…	00480: Glutathione metabolism, 00980: Metabolism of xenobiotics by cytochrome P450, 00982: Drug metabolism - cytochrome P450	-5.62518	3.1188e-05	0.000258	0.000156298	2.62122	0.0179582	0.244821	0.18398	5.24949	8.02797e-05	0.0879796	0.0595434	-1.08861	-0.860742	0.408767	0.824216	0.763489	1.73114	6.78716	3.83296e-05	0.0219363	0.01379	-2.43392	-10.1021	1.63716e-06	0.000114948	6.78369e-05	-1.29152	-2.78426	0.0175816	0.0755474	0.0511082	9.26249	9.06915	9.20088	8.93035	9.12266	8.89734	9.24975	7.65482	7.86481	7.96109	8.07291
54448_at	54448	27179	Il1f6	interleukin 1 family, member 6	GO:0001960: negative regulation of cytokine-mediated signaling pathway, GO:0005125: cytokine activity, GO:0005149: interleukin-1 receptor binding, GO:0005152: interleukin-1 receptor antagonist activity, GO:0005576: extracellular region, GO:0005615: extracellular space, GO:0006954: inflammatory response, GO:1900116: extracellular negative regulation of signal transduction, GO:2000272: negative reg…		-3.63877	0.00205283	0.00774953	0.00522327	5.03432	0.000104392	0.0286011	0.0177994	5.05002	0.000119523	0.120171	0.0805913	1.71372	2.20593	0.0508971	0.477418	0.365621	9.82465	9.06493	2.78681e-06	0.00796032	0.00468473	-7.40458	-7.4375	2.41497e-05	0.000545714	0.000325238	-1.29159	-0.995004	0.340862	0.518388	0.46431	7.44204	6.88557	7.36806	8.77183	7.24534	7.6678	7.98189	3.42599	5.48793	3.66149	3.81467
20531_at	20531	10568	Slc34a2	solute carrier family 34 (sodium phosphate), member 2	GO:0001701: in utero embryonic development, GO:0005436: sodium:phosphate symporter activity, GO:0005903: brush border, GO:0006810: transport, GO:0006811: ion transport, GO:0006814: sodium ion transport, GO:0006817: phosphate ion transport, GO:0006817: phosphate ion transport, GO:0006817: phosphate ion transport, GO:0015293: symporter activity, GO:0015321: sodium-dependent phosphate transmembrane …		-5.94896	1.63853e-05	0.000153764	9.28774e-05	3.58939	0.00228426	0.12337	0.0845545	5.00084	0.000131942	0.120171	0.0809373	1.02936	0.275459	0.788354	0.96111	0.942676	5.55147	6.32082	7.05869e-05	0.028697	0.0177472	-9.94831	-16.3492	1.84031e-08	9.38034e-06	5.52043e-06	-1.84463	-3.11044	0.00978182	0.0507211	0.0333403	6.19286	6.36418	6.59718	6.671	6.31478	6.32829	6.40064	3.06546	3.54835	2.94411	2.598
74180_at	74180	727897	Muc5b	mucin 5, subtype B, tracheobronchial	GO:0003674: molecular_function, GO:0005575: cellular_component, GO:0005576: extracellular region, GO:0008150: biological_process	04970: Salivary secretion	-6.17198	1.06024e-05	0.000108902	6.55864e-05	-2.44117	0.0259701	0.277848	0.212995	4.9608	0.000143027	0.120171	0.0816022	-2.40717	-5.43362	0.000249743	0.108535	0.0649944	1.08226	0.829428	0.425361	0.745284	0.716128	-4.37414	-13.1142	1.47767e-07	2.88729e-05	1.6992e-05	-1.67902	-3.41014	0.00572513	0.0353003	0.0226713	5.20794	5.36461	4.83532	3.42359	3.4827	4.19963	4.23446	3.28345	2.89244	2.80441	3.06691
208613_at	208613	389177	Tmem212	transmembrane protein 212	GO:0003674: molecular_function, GO:0005575: cellular_component, GO:0008150: biological_process, GO:0016020: membrane, GO:0016021: integral to membrane		-5.1621	8.01111e-05	0.000562004	0.000343558	-3.22708	0.00499004	0.162347	0.113888	4.87918	0.000168687	0.131679	0.0894123	-1.95386	-6.22819	8.21303e-05	0.0926241	0.0547931	-1.0208	-0.334055	0.74493	0.907746	0.897596	-2.36792	-9.31517	3.39427e-06	0.00017319	0.000102339	-1.23713	-2.30348	0.0415044	0.132964	0.0966525	3.87344	3.68284	3.40061	2.63259	2.80076	2.70604	2.65012	2.296	2.43642	2.46639	2.48022
404634_at	404634	55506	H2afy2	H2A histone family, member Y2	GO:0000786: nucleosome, GO:0001740: Barr body, GO:0003677: DNA binding, GO:0005634: nucleus, GO:0005694: chromosome, GO:0006334: nucleosome assembly, GO:0007549: dosage compensation, GO:0016568: chromatin modification	05322: Systemic lupus erythematosus	3.4662	0.00298113	0.0104845		-2.07365	0.0537456	0.359531		4.84757	0.000179854	0.131679		-2.1846	-5.22837	0.000337673	0.130944		1.13293	1.16903	0.268307	0.643828		-1.02145	0.0446114	0.965309	0.976246		2.42303	8.13167	5.16447e-06	0.000356646		2.04345	2.57531	1.67989	1.15239	0.922106	1.14226	0.83521	2.01863	1.95303	2.11367	2.34804
73244_at	73244		Prl8a1	prolactin family 8, subfamily a, member 1	GO:0003674: molecular_function, GO:0005179: hormone activity, GO:0005575: cellular_component, GO:0005576: extracellular region, GO:0008150: biological_process		-1.84865	0.082116	0.140145		0.305302	0.763872	0.916623		4.80626	0.000195602	0.131679		-1.35924	-2.62842	0.0244637	0.381815		1.3751	4.27382	0.00146508	0.146289		-1.68495	-5.5992	0.00024122	0.00244675		1.10929	1.10352	0.293074	0.470493		1.92632	1.96792	2.35646	1.45729	1.56381	1.86422	1.69885	1.45447	1.2606	1.2906	1.36346
258861_at	258861		Olfr763	olfactory receptor 763	GO:0004871: signal transducer activity, GO:0004930: G-protein coupled receptor activity, GO:0004984: olfactory receptor activity, GO:0007165: signal transduction, GO:0007186: G-protein coupled receptor signaling pathway, GO:0007608: sensory perception of smell, GO:0016021: integral to membrane, GO:0050911: detection of chemical stimulus involved in sensory perception of smell	04740: Olfactory transduction	-2.6099	0.0183833	0.0434183		0.627345	0.538834	0.81047		4.79674	0.000199428	0.131679		-1.57749	-3.21799	0.00875837	0.280608		1.74183	4.03622	0.00216326	0.177613		-2.65086	-5.78013	0.00018861	0.00206073		1.03654	0.44445	0.66523	0.785858		3.18211	3.74566	3.54799	2.69338	2.52483	2.79788	3.28063	2.44479	2.26538	1.32949	2.14727
17381_at	17381	4321	Mmp12	matrix metallopeptidase 12	GO:0004222: metalloendopeptidase activity, GO:0005509: calcium ion binding, GO:0005576: extracellular region, GO:0005578: proteinaceous extracellular matrix, GO:0006508: proteolysis, GO:0008152: metabolic process, GO:0008233: peptidase activity, GO:0008237: metallopeptidase activity, GO:0008270: zinc ion binding, GO:0016787: hydrolase activity, GO:0031012: extracellular matrix, GO:0035313: wound …		-4.05446	0.000835855	0.00375019	0.00242976	-2.34663	0.0314257	0.297329	0.231229	4.77675	0.000207713	0.131679	0.0921556	-2.90998	-4.96977	0.000498043	0.143525	0.0893202	1.1128	1.19823	0.257237	0.634007	0.594755	-4.34674	-10.3491	1.31503e-06	0.000101304	5.97976e-05	-1.34232	-1.21255	0.250396	0.426426	0.37038	5.54359	5.04698	4.67889	3.45592	2.9146	4.37171	3.17631	3.17153	3.10356	2.67352	3.05658
16391_at	16391	10379	Irf9	interferon regulatory factor 9	GO:0000975: regulatory region DNA binding, GO:0003677: DNA binding, GO:0003700: sequence-specific DNA binding transcription factor activity, GO:0005515: protein binding, GO:0005634: nucleus, GO:0005737: cytoplasm, GO:0006351: transcription, DNA-dependent, GO:0006355: regulation of transcription, DNA-dependent, GO:0045351: type I interferon biosynthetic process	04380: Osteoclast differentiation, 04630: Jak-STAT signaling pathway, 05160: Hepatitis C	-3.46864	0.00296549	0.0104368	0.00714472	2.919	0.0096276	0.20289	0.146086	4.75471	0.000217255	0.131679	0.0921556	-1.03479	-0.382178	0.710016	0.941017	0.911903	1.53866	6.21133	8.18034e-05	0.0303226	0.0192059	-1.65811	-6.70493	5.74333e-05	0.000948666	0.000569877	-1.04141	-0.518836	0.614028	0.749588	0.712683	6.03652	6.01307	5.95313	5.9905	6.00673	5.84653	5.95887	5.14399	5.2861	5.235	5.40927
14825_at	14825	2920	Cxcl1	chemokine (C-X-C motif) ligand 1	GO:0002526: acute inflammatory response, GO:0005125: cytokine activity, GO:0005576: extracellular region, GO:0005615: extracellular space, GO:0005615: extracellular space, GO:0006954: inflammatory response, GO:0006955: immune response, GO:0007204: elevation of cytosolic calcium ion concentration, GO:0008009: chemokine activity, GO:0008083: growth factor activity, GO:0010765: positive regulation o…	04060: Cytokine-cytokine receptor interaction, 04062: Chemokine signaling pathway, 04621: NOD-like receptor signaling pathway	0.736201	0.471724	0.56295	0.54245	3.44164	0.00314354	0.1395	0.0965449	4.73057	0.000228227	0.131679	0.0921556	1.0294	0.0699964	0.945523	0.990925	0.986901	3.90032	6.755	3.99424e-05	0.0219363	0.01379	-1.72785	-5.93341	0.000153664	0.00181247	0.00109694	2.19287	3.43004	0.00552621	0.0344867	0.0221368	3.43402	3.7867	3.91407	3.50835	3.33061	3.85659	4.21268	2.94245	2.96055	2.95676	2.88515
11775_at	11775	8120	Ap3b2	adaptor-related protein complex 3, beta 2 subunit	GO:0005634: nucleus, GO:0005737: cytoplasm, GO:0005794: Golgi apparatus, GO:0005802: trans-Golgi network, GO:0006810: transport, GO:0006886: intracellular protein transport, GO:0006897: endocytosis, GO:0008565: protein transporter activity, GO:0015031: protein transport, GO:0016020: membrane, GO:0016192: vesicle-mediated transport, GO:0030117: membrane coat, GO:0031410: cytoplasmic vesicle, GO:00…	04142: Lysosome	3.10816	0.00643814	0.0191593	0.0137514	-2.87746	0.0105112	0.206909	0.149564	4.72946	0.000228745	0.131679	0.0921556	-2.32719	-7.75508	1.21859e-05	0.0438797	0.0258236	-1.00296	0.0261645	0.979618	0.993214	0.992193	-1.02487	-0.275544	0.788594	0.84821	0.834043	2.26401	7.50949	1.10415e-05	0.000577988	0.000343717	6.20089	5.74069	6.02252	4.81112	4.71721	4.91944	4.66606	5.43531	6.20546	5.92908	6.16681
17393_at	17393	4316	Mmp7	matrix metallopeptidase 7	GO:0002779: antibacterial peptide secretion, GO:0004222: metalloendopeptidase activity, GO:0005576: extracellular region, GO:0005578: proteinaceous extracellular matrix, GO:0006508: proteolysis, GO:0008152: metabolic process, GO:0008233: peptidase activity, GO:0008237: metallopeptidase activity, GO:0008270: zinc ion binding, GO:0016787: hydrolase activity, GO:0030574: collagen catabolic process, …	04310: Wnt signaling pathway	-6.69234	3.94138e-06	5.12095e-05	3.0691e-05	3.79877	0.00145216	0.102874	0.0683978	4.72707	0.000229861	0.131679	0.0921556	1.14197	0.96934	0.354357	0.793728	0.72544	7.69746	6.24361	7.83105e-05	0.0299075	0.0187364	-17.6132	-14.1961	7.01767e-08	1.9875e-05	1.16966e-05	-2.61305	-4.13048	0.00162806	0.0149594	0.00925507	8.49996	8.44029	8.66588	8.76546	8.65302	8.35712	9.0578	3.73367	4.89058	3.69383	4.83497
67775_at	67775	64108	Rtp4	receptor transporter protein 4	GO:0001580: detection of chemical stimulus involved in sensory perception of bitter taste, GO:0003674: molecular_function, GO:0005737: cytoplasm, GO:0006612: protein targeting to membrane, GO:0016020: membrane, GO:0016021: integral to membrane		-5.2255	7.02987e-05	0.000505982	0.000309164	3.98957	0.000961459	0.0853521	0.0559208	4.65335	0.000267282	0.142428	0.0997863	1.09048	0.746188	0.472068	0.853277	0.803334	2.91435	7.30001	2.0207e-05	0.014825	0.00923789	-3.75104	-9.61333	2.56007e-06	0.000148579	8.78442e-05	-1.40355	-2.6607	0.0219511	0.0868194	0.0600116	7.0726	6.42667	6.81684	7.0884	7.07515	6.74404	6.73586	4.6445	5.10954	5.15332	4.54689
27212_at	27212		Snord35b	small nucleolar RNA, C/D box 35B	GO:0003674: molecular_function, GO:0005575: cellular_component, GO:0008150: biological_process		-3.66798	0.0019271	0.00734168	0.00493342	-0.126574	0.900774	0.96659	0.95784	4.63324	0.000278539	0.142428	0.0997863	-1.36676	-3.05602	0.0116011	0.306803	0.218457	1.2792	3.09223	0.0108182	0.321342	0.265044	-1.88301	-7.12375	3.47307e-05	0.000682857	0.000408237	-1.07701	-0.79181	0.445009	0.61316	0.565352	8.93764	8.86087	9.07344	8.40982	8.48414	8.74296	8.37001	8.29164	7.8711	8.0175	7.97323
208164_at	208164	389558	Fam180a	family with sequence similarity 180, member A	GO:0003674: molecular_function, GO:0005575: cellular_component, GO:0005576: extracellular region, GO:0008150: biological_process		-3.32968	0.00400197	0.0132155	0.00921535	-2.84777	0.0111902	0.210813	0.15311	4.63066	0.000280016	0.142428	0.0997863	-3.0103	-6.02237	0.000108642	0.09627	0.0586096	-1.00345	0.0423629	0.967006	0.989822	0.988326	-3.3759	-8.04086	1.23777e-05	0.000373169	0.000221198	-1.12531	-0.501859	0.62554	0.757609	0.72229	5.40661	5.31005	4.74232	3.17703	3.15786	4.2385	3.50705	3.77364	3.33497	2.92412	3.54051
67740_at	67740		4930588J15Rik	RIKEN cDNA 4930588J15 gene			-2.25673	0.0375911	0.0758018		0.0172663	0.986427	0.995651		4.61187	0.000291029	0.143837		-1.33047	-2.9897	0.0130209	0.314828		1.29105	2.99995	0.0127086	0.326597		-1.61684	-6.44815	7.90158e-05	0.001162		1.06238	0.550491	0.592853	0.734018		1.89817	2.01612	2.1389	1.60339	1.51759	1.70546	1.60398	1.3541	1.27899	1.34732	1.33002
258466_at	258466		Olfr1261	olfactory receptor 1261	GO:0004871: signal transducer activity, GO:0004930: G-protein coupled receptor activity, GO:0004984: olfactory receptor activity, GO:0007165: signal transduction, GO:0007186: G-protein coupled receptor signaling pathway, GO:0007608: sensory perception of smell, GO:0016021: integral to membrane, GO:0050911: detection of chemical stimulus involved in sensory perception of smell	04740: Olfactory transduction	-3.12497	0.0062108	0.0185926		-0.469203	0.644932	0.864813		4.60097	0.000297615	0.143941		-1.6381	-3.34959	0.00697866	0.273155		1.39734	3.55781	0.00483961	0.243312		-2.41628	-9.98737	1.81528e-06	0.000121047		-1.05561	-0.240161	0.814569	0.887536		2.66755	3.01086	2.93087	1.54523	2.0761	2.35549	2.5075	1.58793	1.74575	1.44111	1.62599
21926_at	21926	7124	Tnf	tumor necrosis factor	GO:0000060: protein import into nucleus, translocation, GO:0000122: negative regulation of transcription from RNA polymerase II promoter, GO:0000122: negative regulation of transcription from RNA polymerase II promoter, GO:0000165: MAPK cascade, GO:0000185: activation of MAPKKK activity, GO:0000187: activation of MAPK activity, GO:0001775: cell activation, GO:0001819: positive regulation of cytok…	04010: MAPK signaling pathway, 04060: Cytokine-cytokine receptor interaction, 04210: Apoptosis, 04350: TGF-beta signaling pathway, 04380: Osteoclast differentiation, 04612: Antigen processing and presentation, 04620: Toll-like receptor signaling pathway, 04621: NOD-like receptor signaling pathway, 04622: RIG-I-like receptor signaling pathway, 04640: Hematopoietic cell lineage, 04650: Natural kill…	-0.573269	0.574027	0.655177	0.637788	2.85053	0.0111253	0.210267	0.152706	4.58166	0.000309665	0.143941	0.103781	-1.05492	-0.467626	0.649688	0.922299	0.888104	2.02199	6.90335	3.30618e-05	0.0204868	0.0130085	-1.61746	-4.28801	0.0016484	0.00950009	0.00607417	1.31876	2.45452	0.031744	0.111533	0.0793012	3.21539	3.61495	3.56423	3.28455	3.04636	3.45302	3.72455	2.95018	2.67161	2.44897	2.99044
240063_at	240063		Zfp811	zinc finger protein 811	GO:0003674: molecular_function, GO:0005575: cellular_component, GO:0008150: biological_process, GO:0046872: metal ion binding		0.310189	0.760217	0.814297		-0.810775	0.428787	0.747597		4.57125	0.00031637	0.143941		-1.67907	-4.24601	0.00155404	0.184371		1.28161	2.28757	0.0440815	0.417349		-1.44911	-3.07341	0.0119791	0.0397088		1.48499	3.63576	0.0038405	0.026875		3.53864	3.30569	3.73406	2.68305	2.62344	3.13917	2.64434	3.07532	2.69256	2.76787	3.36868
246730_at	246730	4938	Oas1a	2'-5' oligoadenylate synthetase 1A	GO:0000166: nucleotide binding, GO:0001730: 2'-5'-oligoadenylate synthetase activity, GO:0001730: 2'-5'-oligoadenylate synthetase activity, GO:0003723: RNA binding, GO:0003725: double-stranded RNA binding, GO:0005515: protein binding, GO:0005524: ATP binding, GO:0005634: nucleus, GO:0006164: purine nucleotide biosynthetic process, GO:0006955: immune response, GO:0008152: metabolic process, GO:000…	05160: Hepatitis C	-6.75309	3.51979e-06	4.70164e-05	2.81621e-05	2.24966	0.0381206	0.319569	0.250565	4.55812	0.000325038	0.143941	0.103781	-1.20183	-1.33707	0.209683	0.702736	0.612451	2.2778	5.24712	0.000321815	0.0633724	0.040456	-4.8531	-12.1078	3.10969e-07	4.50482e-05	2.65113e-05	-1.77281	-4.15759	0.00155451	0.01448	0.00895168	5.40195	4.93303	5.60921	4.98344	5.16346	4.91094	5.2248	2.76696	3.30296	3.21145	2.90328
16832_at	16832	3945	Ldhb	lactate dehydrogenase B	GO:0000166: nucleotide binding, GO:0003824: catalytic activity, GO:0004457: lactate dehydrogenase activity, GO:0004459: L-lactate dehydrogenase activity, GO:0004459: L-lactate dehydrogenase activity, GO:0005737: cytoplasm, GO:0005739: mitochondrion, GO:0005975: carbohydrate metabolic process, GO:0006089: lactate metabolic process, GO:0006096: glycolysis, GO:0016491: oxidoreductase activity, GO:00…	00010: Glycolysis / Gluconeogenesis, 00270: Cysteine and methionine metabolism, 00620: Pyruvate metabolism, 00640: Propanoate metabolism, 01100: Metabolic pathways	1.3706	0.188465	0.270589	0.24745	-2.28583	0.0354822	0.310651	0.242778	4.55133	0.00032961	0.143941	0.103781	-2.24023	-5.04528	0.000444178	0.143525	0.0893202	1.07196	0.820256	0.430341	0.747978	0.719126	-1.32925	-2.16474	0.0560753	0.120744	0.0979997	1.8066	4.70154	0.000627196	0.00774577	0.0047396	6.4688	6.0725	6.66481	5.28341	4.61825	5.4399	5.53122	5.82345	6.26872	6.21426	5.64808
234311_at	234311	55601	Ddx60	DEAD (Asp-Glu-Ala-Asp) box polypeptide 60	GO:0003690: double-stranded DNA binding, GO:0003723: RNA binding, GO:0003725: double-stranded RNA binding, GO:0003727: single-stranded RNA binding, GO:0004386: helicase activity, GO:0005515: protein binding, GO:0005524: ATP binding, GO:0005737: cytoplasm, GO:0005737: cytoplasm, GO:0009615: response to virus, GO:0016787: hydrolase activity, GO:0051607: defense response to virus, GO:1900245: positi…		-7.06886	1.97097e-06	2.99821e-05	1.79041e-05	5.43799	4.55238e-05	0.016719	0.0101287	4.53227	0.00034281	0.144012	0.103781	1.29446	2.0733	0.0638352	0.514067	0.401072	2.65533	9.34844	2.08549e-06	0.00796032	0.00468473	-3.40012	-10.9599	7.79242e-07	7.58304e-05	4.47987e-05	-1.65754	-4.54313	0.000813667	0.00920112	0.00564016	5.55533	5.31002	5.64101	5.67526	5.70122	5.85058	6.22742	4.0806	3.48119	3.53964	3.79183
217066_at	217066		Gm15698	transcription elongation factor B (SIII), polypeptide 2 pseudogene			-5.03206	0.000104882	0.000701982		1.07795	0.29623	0.65744		4.52426	0.000348517	0.144012		-1.25595	-2.28733	0.0442452	0.457303		1.4822	3.9847	0.00235622	0.183989		-2.33429	-7.83871	1.54179e-05	0.00042519		-1.25393	-2.46223	0.0313108	0.110473		3.65835	3.63931	3.79287	3.3278	3.38434	3.17598	3.56386	2.7207	2.68059	2.15579	2.25914
258751_at	258751		Olfr608	olfactory receptor 608	GO:0004871: signal transducer activity, GO:0004930: G-protein coupled receptor activity, GO:0004984: olfactory receptor activity, GO:0007165: signal transduction, GO:0007186: G-protein coupled receptor signaling pathway, GO:0007608: sensory perception of smell, GO:0016021: integral to membrane, GO:0050911: detection of chemical stimulus involved in sensory perception of smell	04740: Olfactory transduction	0.171408	0.865943	0.899598		0.222489	0.826605	0.939796		4.50639	0.000361601	0.144385		-1.4296	-2.61383	0.0250948	0.385931		1.4184	4.26043	0.00149733	0.146289		-1.44762	-3.2226	0.00931395	0.0330891		1.40075	3.25412	0.00756196	0.0427178		1.69306	1.37051	2.01321	1.02762	1.44349	0.935626	1.33401	0.998305	1.30296	1.29031	1.11568
432867_at	432867		Defb48	defensin beta 48	GO:0003674: molecular_function, GO:0005575: cellular_component, GO:0008150: biological_process		-2.53373	0.0215028	0.0489302		0.371556	0.71485	0.896352		4.48822	0.000375426	0.144385		-1.35952	-2.47272	0.0320891	0.417636		1.39327	4.12361	0.0018728	0.165634		-1.83692	-5.89636	0.000161419	0.00187326		1.03117	0.316628	0.757381	0.850435		2.11099	2.4533	2.66493	1.71319	2.1507	1.99126	2.04701	1.68627	1.6088	1.46489	1.42523
20390_at	20390	6441	Sftpd	surfactant associated protein D	GO:0001530: lipopolysaccharide binding, GO:0005576: extracellular region, GO:0005578: proteinaceous extracellular matrix, GO:0005581: collagen, GO:0005615: extracellular space, GO:0005771: multivesicular body, GO:0005791: rough endoplasmic reticulum, GO:0007585: respiratory gaseous exchange, GO:0008228: opsonization, GO:0030246: carbohydrate binding, GO:0031410: cytoplasmic vesicle, GO:0032703: n…	04145: Phagosome	-16.5799	7.12815e-12	4.38225e-09	2.579e-09	2.1506	0.0463057	0.342004	0.272149	4.47981	0.000382002	0.144385	0.108973	-1.14568	-1.2049	0.254919	0.734468	0.64918	1.78422	5.2234	0.000333391	0.064642	0.0412127	-10.1554	-19.817	2.91507e-09	5.93204e-06	3.49107e-06	-4.96806	-15.3116	7.87877e-09	8.27467e-06	4.86973e-06	7.96477	8.31061	8.32447	7.80099	8.23603	8.01774	7.96367	5.05517	5.09623	4.72706	4.50046
12517_at	12517	971	Cd72	CD72 antigen	GO:0005887: integral to plasma membrane	04662: B cell receptor signaling pathway	1.3359	0.199328	0.283152		3.15023	0.00588394	0.172666		4.47516	0.000385688	0.144385		-1.01407	-0.152745	0.881519	0.980393		1.85301	6.22442	8.03677e-05	0.0302351		-1.21888	-2.15731	0.0567786	0.121854		1.54165	4.09785	0.00172142	0.0154998		2.82104	3.07799	2.90055	2.97458	2.66114	3.01124	2.99352	2.90927	2.48411	2.51498	2.65824
258612_at	258612		Olfr303	olfactory receptor 303	GO:0004871: signal transducer activity, GO:0004930: G-protein coupled receptor activity, GO:0004984: olfactory receptor activity, GO:0007165: signal transduction, GO:0007186: G-protein coupled receptor signaling pathway, GO:0007608: sensory perception of smell, GO:0016021: integral to membrane, GO:0050911: detection of chemical stimulus involved in sensory perception of smell	04740: Olfactory transduction	-1.51071	0.149369	0.225436		0.487792	0.631977	0.858532		4.43794	0.000416543	0.151761		-1.36879	-2.74825	0.0198451	0.351275		1.46017	3.52896	0.00508432	0.244701		-1.70552	-5.72431	0.000203386	0.00217201		1.17188	1.25334	0.235754	0.41036		2.64393	3.10795	2.69542	2.50585	2.41388	2.35235	2.22681	2.0418	2.08796	2.09035	2.02249
21929_at	21929	7128	Tnfaip3	tumor necrosis factor, alpha-induced protein 3	GO:0001922: B-1 B cell homeostasis, GO:0002020: protease binding, GO:0002237: response to molecule of bacterial origin, GO:0002237: response to molecule of bacterial origin, GO:0002315: marginal zone B cell differentiation, GO:0002632: negative regulation of granuloma formation, GO:0002634: regulation of germinal center formation, GO:0002637: regulation of immunoglobulin production, GO:0002677: n…	04621: NOD-like receptor signaling pathway	-2.95872	0.00885056	0.0244909	0.0179308	3.31731	0.00410999	0.152879	0.106988	4.4254	0.000427499	0.151761	0.114384	1.06177	0.02469	0.980769	0.996371	0.994655	4.80865	8.04594	8.40825e-06	0.0119982	0.00733694	-4.81399	-10.1958	1.50571e-06	0.000109653	6.47177e-05	-1.06295	-0.133105	0.896485	0.937817	0.927692	5.56879	5.58317	6.37763	5.22828	5.24096	6.39048	6.54817	3.80681	3.61817	3.22387	3.79048
69540_at	69540	5655	Klk10	kallikrein related-peptidase 10	GO:0003674: molecular_function, GO:0005575: cellular_component, GO:0008150: biological_process		2.07619	0.0534838	0.100062	0.0837618	3.4162	0.00332095	0.14169	0.0981699	4.41817	0.000433945	0.151761	0.114384	1.02183	0.153399	0.881017	0.980393	0.969858	2.46962	6.17678	8.57287e-05	0.0304297	0.0192059	-1.18387	-1.73484	0.113898	0.202198	0.174511	2.04149	4.62652	0.000709176	0.00841199	0.00515429	4.0872	3.72691	3.94895	3.96177	3.84949	4.24615	3.72955	3.79435	3.82608	3.40454	3.67829
735284_at	735284		Mir708	microRNA 708	GO:0071230: cellular response to amino acid stimulus, GO:0071391: cellular response to estrogen stimulus		-2.65836	0.0166286	0.0400248		-2.18176	0.0435718	0.335602		4.3819	0.000467815	0.159348		-2.25037	-4.60195	0.000879931	0.173676		1.08613	0.998788	0.340412	0.689896		-2.44616	-5.8039	0.000182671	0.00202125		-1.00081	0.181415	0.859302	0.915141		3.27152	2.48895	3.32421	2.34734	1.60556	1.96688	1.55618	1.49245	2.02854	1.93888	1.61124
276952_at	276952	91608	Rasl10b	RAS-like, family 10, member B	GO:0000166: nucleotide binding, GO:0003924: GTPase activity, GO:0005525: GTP binding, GO:0005575: cellular_component, GO:0005622: intracellular, GO:0005886: plasma membrane, GO:0006184: GTP catabolic process, GO:0007165: signal transduction, GO:0007264: small GTPase mediated signal transduction, GO:0008150: biological_process, GO:0016020: membrane		0.352422	0.728887	0.788478		1.23281	0.234554	0.602323		4.3457	0.000504323	0.16509		-1.18906	-1.87513	0.0890779	0.559088		1.42239	3.88532	0.00278095	0.197927		-1.28103	-3.3013	0.00816152	0.0300276		1.32027	2.75294	0.0186	0.0782037		3.37153	3.52451	3.41331	3.28122	3.11334	3.18489	3.16776	3.12141	2.96248	3.05521	3.17466
17858_at	17858		Mx2	myxovirus (influenza virus) resistance 2	GO:0000166: nucleotide binding, GO:0003924: GTPase activity, GO:0005525: GTP binding, GO:0005737: cytoplasm, GO:0005829: cytosol, GO:0009615: response to virus, GO:0045087: innate immune response		-4.83866	0.000157104	0.00097034	0.000598941	4.01491	0.000910288	0.0841855	0.0554085	4.33217	0.000518695	0.167618	0.128205	1.18944	0.697882	0.500541	0.867516	0.819819	4.79357	9.81074	1.31937e-06	0.00796032	0.00468473	-6.47458	-10.9534	7.83463e-07	7.58304e-05	4.47987e-05	-1.60655	-2.07889	0.0615092	0.172401	0.129846	6.05031	4.86457	5.21073	5.21562	4.9857	6.00692	6.26459	2.88702	2.72214	2.85592	2.59397
26919_at	26919	23567	Zfp346	zinc finger protein 346	GO:0003676: nucleic acid binding, GO:0003723: RNA binding, GO:0003725: double-stranded RNA binding, GO:0003725: double-stranded RNA binding, GO:0005515: protein binding, GO:0005622: intracellular, GO:0005634: nucleus, GO:0005730: nucleolus, GO:0005730: nucleolus, GO:0005737: cytoplasm, GO:0006915: apoptotic process, GO:0008270: zinc ion binding, GO:0046872: metal ion binding		-1.32775	0.201951	0.285864	0.2626	-2.32337	0.032923	0.301547	0.235207	4.32434	0.0005272	0.16821	0.128205	-1.73623	-4.49689	0.00103891	0.178656	0.115874	1.04598	0.61831	0.549579	0.815632	0.793968	-1.586	-5.10131	0.000486151	0.00399923	0.00245449	1.14506	1.38213	0.194023	0.362379	0.306616	5.91165	5.74711	5.58628	4.77436	4.62688	5.19251	5.15897	5.07921	4.87732	5.11864	5.25592
258075_at	258075	390883	Olfr832	olfactory receptor 832	GO:0004871: signal transducer activity, GO:0004930: G-protein coupled receptor activity, GO:0004984: olfactory receptor activity, GO:0007165: signal transduction, GO:0007186: G-protein coupled receptor signaling pathway, GO:0007608: sensory perception of smell, GO:0016021: integral to membrane, GO:0050911: detection of chemical stimulus involved in sensory perception of smell		-0.699756	0.493618	0.582688		-0.216873	0.830909	0.941675		4.30277	0.000551384	0.168456		-1.29933	-2.91261	0.0148942	0.327309		1.21791	2.47118	0.0320464	0.394993		-1.34493	-3.90472	0.00302588	0.0147348		1.17662	1.82285	0.0952593	0.228917		1.13281	1.23147	1.24273	0.84713	0.830707	0.780414	0.842393	0.877115	0.824916	0.765783	0.622372
18588_at	18588	5148	Pde6g	phosphodiesterase 6G, cGMP-specific, rod, gamma	GO:0000187: activation of MAPK activity, GO:0004114: 3',5'-cyclic-nucleotide phosphodiesterase activity, GO:0005515: protein binding, GO:0007601: visual perception, GO:0008152: metabolic process, GO:0016787: hydrolase activity, GO:0030553: cGMP binding, GO:0045742: positive regulation of epidermal growth factor receptor signaling pathway, GO:0045745: positive regulation of G-protein coupled recep…	00230: Purine metabolism, 04744: Phototransduction	-4.10728	0.000745911	0.00342717		-1.36246	0.190971	0.559593		4.3002	0.000554335	0.168456		-1.44202	-3.45016	0.00587185	0.261816		1.12178	1.75998	0.107535	0.50092		-1.81118	-7.88037	1.47305e-05	0.000411343		-1.11965	-1.15365	0.2728	0.450072		3.20616	3.39938	3.31499	2.59387	2.60233	2.88973	2.99465	2.51575	2.48883	2.33306	2.46394
15957_at	15957	439996	Ifit1	interferon-induced protein with tetratricopeptide repeats 1	GO:0005737: cytoplasm, GO:0009615: response to virus, GO:0019060: intracellular transport of viral proteins in host cell, GO:0032091: negative regulation of protein binding, GO:0035457: cellular response to interferon-alpha, GO:0035458: cellular response to interferon-beta, GO:0043657: host cell, GO:0045070: positive regulation of viral genome replication, GO:0045071: negative regulation of viral…	05160: Hepatitis C	-4.08249	0.000786837	0.00357416	0.00231036	4.0426	0.000857499	0.0821766	0.0540873	4.29795	0.000556937	0.168456	0.133252	1.24145	0.988073	0.345526	0.78792	0.718796	6.80465	7.15163	2.424e-05	0.0165133	0.0102736	-7.01176	-13.1692	1.42085e-07	2.81999e-05	1.65959e-05	-1.27924	-1.21876	0.248121	0.423898	0.368063	6.99282	5.98764	6.50034	6.25007	6.44031	7.14587	7.33212	3.84945	3.69824	3.86526	3.52763
271375_at	271375	344807	Cd200r2	Cd200 receptor 2	GO:0004872: receptor activity, GO:0005515: protein binding, GO:0009897: external side of plasma membrane, GO:0016020: membrane, GO:0016021: integral to membrane		-1.87272	0.0785461	0.135257		-1.44145	0.167766	0.535347		4.29341	0.000562222	0.168456		-1.61778	-3.85294	0.00296917	0.217561		1.14854	1.6893	0.120664	0.515059		-1.69457	-4.95705	0.000599554	0.00463997		1.09649	0.941181	0.366579	0.544298		1.70637	2.25943	2.16827	1.49345	1.37668	1.1066	1.47228	1.34445	1.26799	1.14834	1.437
387249_at	387249		Mirlet7g	microRNA let7g	GO:0070482: response to oxygen levels, GO:0071222: cellular response to lipopolysaccharide, GO:0071241: cellular response to inorganic substance		-2.66846	0.0162838	0.0393604		0.0200556	0.984234	0.995487		4.29145	0.00056453	0.168456		-1.48888	-3.07464	0.0112314	0.306003		1.42102	3.13623	0.0100199	0.317231		-2.06915	-6.49051	7.49219e-05	0.00111905		1.02252	0.114225	0.911093	0.946659		2.3751	2.8345	2.27097	2.20693	1.9511	1.84935	1.70871	1.22027	1.54278	1.45484	1.61575
100861727_at	100861727		LOC100861727	protein FAM205A-like			-1.27967	0.217983	0.303882		-2.13767	0.0474867	0.34425		4.27894	0.000579422	0.168456		-2.56988	-6.08868	9.92165e-05	0.0926241		1.17042	0.679237	0.511717	0.793331		-2.23727	-6.373	8.68859e-05	0.00124152		1.34443	1.44953	0.174757	0.338729		2.52058	2.43153	3.03391	0.956894	0.999976	1.68751	1.51767	1.86569	1.39517	1.46051	1.31564
57376_at	57376	6605	Smarce1	SWI/SNF related, matrix associated, actin dependent regulator of chromatin, subfamily e, member 1	GO:0003677: DNA binding, GO:0005515: protein binding, GO:0005634: nucleus, GO:0006337: nucleosome disassembly, GO:0006338: chromatin remodeling, GO:0007399: nervous system development, GO:0008080: N-acetyltransferase activity, GO:0016514: SWI/SNF complex, GO:0016514: SWI/SNF complex, GO:0016568: chromatin modification, GO:0016922: ligand-dependent nuclear receptor binding, GO:0017053: transcripti…		1.4001	0.17961	0.260839	0.237695	-2.56152	0.0203104	0.255351	0.193378	4.27727	0.000581435	0.168456	0.134766	-1.66765	-4.70487	0.000748947	0.164192	0.101899	1.02273	0.246465	0.810085	0.933398	0.927509	-1.17953	-1.9586	0.0790691	0.155292	0.129618	1.44595	3.7995	0.00288256	0.021911	0.0138064	8.55124	8.8447	8.82055	7.88291	7.81684	8.21596	8.0775	8.58465	8.37395	8.57152	8.48662
625342_at	625342		Gm13315	lactate dehydrogenase A pseudogene			-4.36194	0.000431729	0.00219931	0.00139163	-2.22495	0.0400269	0.324598	0.256265	4.22447	0.00064906	0.17744	0.136794	-1.97229	-5.34492	0.000284304	0.117478	0.0702894	1.06928	0.576206	0.576647	0.828702	0.808837	-2.54715	-7.36359	2.62815e-05	0.000572043	0.00034077	-1.20779	-1.7715	0.103804	0.241374	0.190738	6.27463	6.14795	6.7388	5.41313	5.16827	5.56839	5.53787	5.18275	4.85462	4.79234	5.34299
100504625_at	100504625		Gm20317	predicted gene, 20317			-12.0789	1.00032e-09	1.18807e-07	6.99192e-08	2.87656	0.010531	0.206909	0.149564	4.21589	0.000660787	0.17744	0.136794	-1.08963	-0.52827	0.608389	0.908598	0.871941	3.72098	5.27394	0.000309239	0.0619654	0.0393667	-36.8343	-14.7484	4.89423e-08	1.73752e-05	1.02255e-05	-9.08484	-12.1245	9.24177e-08	4.23542e-05	2.49259e-05	8.7172	8.25304	9.01039	8.85817	8.79107	8.19687	8.3169	2.70805	4.24272	3.69636	2.70396
269799_at	269799	440077	Clec4a1	C-type lectin domain family 4, member a1	GO:0003674: molecular_function, GO:0005575: cellular_component, GO:0008150: biological_process		4.76505	0.000183402	0.00109675	0.000680145	3.57827	0.00233985	0.125077	0.0855288	4.20907	0.000670245	0.17744	0.136794	1.06496	0.378793	0.712453	0.941458	0.912908	2.48038	6.7365	4.09033e-05	0.0219363	0.01379	1.26909	1.66213	0.127942	0.220341	0.192017	2.95581	7.98663	6.14162e-06	0.000392172	0.000233756	2.61493	2.69863	2.27276	2.44574	2.80384	2.93627	2.23056	3.29678	2.53775	2.96713	2.60268
57783_at	57783	10318	Tnip1	TNFAIP3 interacting protein 1	GO:0002755: MyD88-dependent toll-like receptor signaling pathway, GO:0005515: protein binding, GO:0005634: nucleus, GO:0005737: cytoplasm, GO:0005737: cytoplasm, GO:0006954: inflammatory response, GO:0007159: leukocyte cell-cell adhesion, GO:0009101: glycoprotein biosynthetic process, GO:0031593: polyubiquitin binding, GO:0043124: negative regulation of I-kappaB kinase/NF-kappaB cascade, GO:00431…		-0.197326	0.84593	0.883168	0.875508	3.04179	0.00741778	0.185305	0.13208	4.20839	0.000671209	0.17744	0.136794	-1.01636	-0.160141	0.875835	0.979789	0.969252	1.69577	5.62922	0.000184139	0.0455039	0.0287528	-1.35794	-3.38698	0.00707263	0.0271179	0.0186649	1.26921	2.43705	0.0327474	0.113543	0.0809759	5.58874	5.78781	5.82041	5.58906	5.66459	5.78675	5.79905	5.52277	5.12584	5.1559	5.33776
16205_at	16205	170575	Gimap1	GTPase, IMAP family member 1	GO:0005525: GTP binding, GO:0005783: endoplasmic reticulum, GO:0030183: B cell differentiation, GO:0030217: T cell differentiation		2.19682	0.042304	0.0832343	0.0684263	-0.716725	0.483351	0.778495	0.735313	4.20512	0.0006758	0.17744	0.136794	-1.42037	-3.30345	0.00755601	0.274433	0.189976	1.20745	2.24447	0.0474869	0.421084	0.366852	-1.09361	-1.14888	0.277747	0.391177	0.360969	1.56823	4.39259	0.00104527	0.0108982	0.00669037	3.64859	3.56685	3.66844	3.43445	3.05159	2.96492	2.98588	3.45624	3.41978	3.70785	3.39174
100217430_at	100217430		Snord66	small nucleolar RNA, C/D box 66	GO:0003674: molecular_function, GO:0005575: cellular_component, GO:0008150: biological_process		-0.80965	0.429416	0.521657	0.500468	-1.18129	0.253875	0.618571	0.559703	4.17175	0.000724567	0.182634	0.136794	-1.85078	-3.57591	0.00473745	0.24901	0.16435	1.24709	2.51659	0.0296061	0.386265	0.329671	-1.80815	-4.80821	0.000746692	0.00543335	0.00336465	1.27649	1.91462	0.081569	0.207073	0.159672	9.9051	9.34511	9.82324	8.56221	8.16602	9.26543	9.05334	9.17229	8.68051	8.6243	8.88505
319916_at	319916		A730011C13Rik	RIKEN cDNA A730011C13 gene	GO:0003674: molecular_function, GO:0005575: cellular_component, GO:0008150: biological_process		-2.25064	0.0380469	0.0765261	0.0625083	-2.61638	0.0181389	0.246025	0.184878	4.16617	0.000733057	0.182854	0.136794	-1.64976	-4.65647	0.000807771	0.172548	0.106986	1.01333	0.140055	0.891273	0.964653	0.961107	-1.60426	-5.6583	0.00022248	0.00232209	0.00141037	1.04207	0.440849	0.667758	0.787444	0.756262	3.9236	4.144	4.21355	3.27071	3.5511	3.16478	3.48622	3.48108	3.38462	3.51906	3.27062
258890_at	258890		Olfr1297	olfactory receptor 1297	GO:0004871: signal transducer activity, GO:0004930: G-protein coupled receptor activity, GO:0004984: olfactory receptor activity, GO:0007165: signal transduction, GO:0007186: G-protein coupled receptor signaling pathway, GO:0007608: sensory perception of smell, GO:0016021: integral to membrane, GO:0050911: detection of chemical stimulus involved in sensory perception of smell	04740: Olfactory transduction	-1.79539	0.0905288	0.151619		0.382155	0.707119	0.893354		4.1617	0.000739948	0.182854		-1.30022	-2.37405	0.0380841	0.441237		1.35335	3.53141	0.00506308	0.244701		-1.61511	-5.59358	0.000243088	0.00246075		1.08949	0.856418	0.409815	0.583209		1.87566	2.01268	1.83776	1.85258	1.25849	1.48588	1.46575	1.24003	1.43683	1.10225	1.06731
15944_at	15944		Irgm1	immunity-related GTPase family M member 1	GO:0000166: nucleotide binding, GO:0005525: GTP binding, GO:0005764: lysosome, GO:0005768: endosome, GO:0005770: late endosome, GO:0005783: endoplasmic reticulum, GO:0005794: Golgi apparatus, GO:0005886: plasma membrane, GO:0006914: autophagy, GO:0006952: defense response, GO:0016020: membrane, GO:0016787: hydrolase activity, GO:0016817: hydrolase activity, acting on acid anhydrides, GO:0031410: …		-4.16318	0.000661346	0.00310542	0.0019952	3.32146	0.00407347	0.152791	0.106988	4.14436	0.000767262	0.184187	0.136794	1.01191	0.114725	0.910846	0.985313	0.978563	2.37798	7.6596	1.31395e-05	0.013333	0.00845655	-2.85527	-8.69138	6.27569e-06	0.000243041	0.000143695	-1.21501	-1.39991	0.188777	0.356271	0.30036	6.96447	6.21454	6.82049	6.28811	6.58344	6.9373	6.96097	5.22652	5.2524	5.12383	5.14363
104099_at	104099	3680	Itga9	integrin alpha 9	GO:0005518: collagen binding, GO:0007155: cell adhesion, GO:0007229: integrin-mediated signaling pathway, GO:0009925: basal plasma membrane, GO:0016020: membrane, GO:0016021: integral to membrane, GO:0030593: neutrophil chemotaxis, GO:0034679: alpha9-beta1 integrin complex, GO:0043236: laminin binding	04510: Focal adhesion, 04512: ECM-receptor interaction, 04514: Cell adhesion molecules (CAMs), 04810: Regulation of actin cytoskeleton, 05410: Hypertrophic cardiomyopathy (HCM), 05412: Arrhythmogenic right ventricular cardiomyopathy (ARVC), 05414: Dilated cardiomyopathy	-3.5857	0.00230256	0.00852536	0.00576946	-2.90814	0.00985136	0.203544	0.146802	4.12627	0.000796841	0.184533	0.136794	-1.88435	-5.03436	0.00045157	0.143525	0.0893202	-1.01718	-0.220726	0.829549	0.941001	0.935853	-2.04693	-7.74344	1.71248e-05	0.000447766	0.000266557	-1.10494	-0.789434	0.44634	0.614276	0.566674	6.99109	7.19847	7.34556	6.22344	5.9292	6.63742	6.20578	5.98905	6.30879	6.03101	6.25356
14289_at	14289	2358	Fpr2	formyl peptide receptor 2	GO:0004871: signal transducer activity, GO:0004872: receptor activity, GO:0004930: G-protein coupled receptor activity, GO:0004982: N-formyl peptide receptor activity, GO:0005886: plasma membrane, GO:0006935: chemotaxis, GO:0007165: signal transduction, GO:0007186: G-protein coupled receptor signaling pathway, GO:0016020: membrane, GO:0016021: integral to membrane	04080: Neuroactive ligand-receptor interaction, 05150: Staphylococcus aureus infection	3.22179	0.00504709	0.0158033	0.0111811	3.89365	0.00118283	0.0946486	0.0624414	4.10648	0.000830529	0.184533	0.136794	1.23315	1.25569	0.23668	0.722136	0.635391	7.0085	5.92179	0.000121763	0.03583	0.0229547	1.00674	0.108648	0.915664	0.940288	0.933835	5.7217	5.18606	0.000289099	0.00457728	0.00277035	1.10492	1.27385	1.59296	1.58222	1.42356	1.24995	2.14312	1.45933	1.38246	1.43952	1.07933
99899_at	99899	10561	Ifi44	interferon-induced protein 44	GO:0003674: molecular_function, GO:0005737: cytoplasm, GO:0008150: biological_process		-7.60747	7.56181e-07	1.42347e-05	8.4786e-06	6.0379	1.37631e-05	0.00867279	0.00510403	4.08657	0.000865886	0.184533	0.136794	1.71536	4.00667	0.0022997	0.201272	0.131713	4.87216	8.08918	8.0064e-06	0.0119982	0.00733694	-6.97752	-9.90379	1.95839e-06	0.000126898	7.50666e-05	-2.45661	-6.29392	5.57066e-05	0.00156363	0.000935846	7.27006	6.85085	6.83853	7.82442	7.42643	7.6637	8.11543	4.99215	3.88981	3.90069	3.56513
21912_at	21912	7102	Tspan7	tetraspanin 7	GO:0016020: membrane, GO:0016021: integral to membrane		3.61162	0.00217701	0.00812343	0.00548648	-3.18066	0.00551265	0.167816	0.118171	4.0819	0.000874391	0.184533	0.136794	-1.84182	-5.01617	0.000464174	0.143525	0.0893202	-1.04491	-0.57976	0.574334	0.827298	0.807029	1.03874	0.45481	0.659108	0.744132	0.723595	1.83095	5.96337	8.94357e-05	0.00211656	0.00126702	6.04303	5.60421	5.75373	4.68476	4.92099	5.23749	4.82116	5.91684	5.82356	5.69929	6.00937
666914_at	666914		Gm8359	predicted gene 8359	GO:0003674: molecular_function, GO:0005575: cellular_component, GO:0008150: biological_process		-0.994637	0.333969	0.427029		-0.108307	0.91503	0.971412		4.07477	0.000887561	0.184533		-1.56186	-2.81033	0.0178058	0.340615		1.39559	3.33907	0.00704785	0.2797		-1.75003	-3.69004	0.00428701	0.0189112		1.24552	2.09358	0.0599616	0.169514		1.51677	2.37231	2.09706	1.00749	1.49276	1.46627	1.54969	1.21076	1.44265	0.834446	1.36101
64384_at	64384	23410	Sirt3	sirtuin 3 (silent mating type information regulation 2, homolog) 3 (S. cerevisiae)	GO:0005737: cytoplasm, GO:0005739: mitochondrion, GO:0005739: mitochondrion, GO:0006476: protein deacetylation, GO:0008152: metabolic process, GO:0008270: zinc ion binding, GO:0009060: aerobic respiration, GO:0016020: membrane, GO:0016787: hydrolase activity, GO:0016811: hydrolase activity, acting on carbon-nitrogen (but not peptide) bonds, in linear amides, GO:0034983: peptidyl-lysine deacetylat…		-1.4301	0.170952	0.251211	0.22811	-0.918947	0.371079	0.711394	0.660497	4.06614	0.000903738	0.184533	0.136794	-1.38681	-3.08736	0.0109857	0.305585	0.216803	1.14926	1.98295	0.074205	0.462506	0.4119	-1.44031	-3.84622	0.00332533	0.0157542	0.0103726	1.10657	1.26382	0.232108	0.406234	0.350263	4.44898	4.47351	4.84326	4.07918	4.15644	4.0732	4.20077	4.03026	4.1995	4.13902	3.90958
29858_at	29858	5372	Pmm1	phosphomannomutase 1	GO:0003824: catalytic activity, GO:0004615: phosphomannomutase activity, GO:0005737: cytoplasm, GO:0008152: metabolic process, GO:0016853: isomerase activity, GO:0019307: mannose biosynthetic process, GO:0043025: neuronal cell body, GO:0046872: metal ion binding	00051: Fructose and mannose metabolism, 00520: Amino sugar and nucleotide sugar metabolism, 01100: Metabolic pathways	-2.98891	0.00830118	0.0233323	0.0170133	-2.08441	0.0526437	0.357659	0.287565	4.06383	0.000908125	0.184533	0.136794	-1.479	-3.92789	0.0026205	0.212535	0.139377	1.04486	0.67044	0.517086	0.797752	0.774345	-1.58296	-5.5406	0.000261482	0.00259077	0.00157676	-1.02433	-0.254205	0.80397	0.881642	0.861462	6.61991	6.41963	6.45392	5.76687	5.87395	6.09373	5.98822	5.63892	5.85019	5.86723	5.97498
66346_at	66346		1700029P11Rik	RIKEN cDNA 1700029P11 gene	GO:0003674: molecular_function, GO:0005739: mitochondrion, GO:0008150: biological_process		-2.89436	0.0101426	0.0272439	0.0201145	1.27661	0.219036	0.587948	0.524409	4.06244	0.000910775	0.184533	0.136794	-1.22759	-1.57296	0.145602	0.634895	0.532802	1.49807	4.64588	0.000808004	0.107466	0.0717721	-1.87426	-5.23144	0.000403408	0.00350873	0.00214562	-1.01916	-0.209184	0.838082	0.902032	0.885415	4.61681	4.35224	4.98328	4.15254	4.44765	4.48807	4.40207	3.9315	3.94305	3.59461	3.55672
100316689_at	100316689		Mir1931	microRNA 1931			0.642967	0.52889	0.614892	0.596801	-2.96761	0.00868521	0.19558	0.139641	4.04629	0.000942141	0.184533	0.136794	-1.96329	-4.7053	0.000748439	0.164192	0.101899	-1.02523	-0.393326	0.701966	0.888383	0.876195	-1.3392	-2.76977	0.0200671	0.0575963	0.0429236	1.42994	3.15457	0.00903738	0.0481513	0.0314696	5.35044	5.22848	5.79782	4.10354	4.58561	4.8534	4.3813	5.08724	5.05854	5.12051	4.96466
791075_at	791075		Mir761	microRNA 761			0.456917	0.65356	0.724849	0.710294	-1.3018	0.210485	0.579454	0.515321	4.04538	0.000943941	0.184533	0.136794	-1.50936	-3.45768	0.00579675	0.261816	0.176306	1.13479	1.73358	0.11228	0.505672	0.456945	-1.28691	-2.59735	0.0269245	0.0709004	0.0540604	1.33094	3.03589	0.011183	0.0556742	0.0367905	5.74401	5.62131	6.01796	4.86815	5.27158	5.41311	5.2338	5.67651	5.35733	5.29984	5.397
20210_at	20210		Saa3	serum amyloid A 3	GO:0005576: extracellular region, GO:0006953: acute-phase response, GO:0034364: high-density lipoprotein particle		0.320636	0.752424	0.808113	0.795373	4.42856	0.000374435	0.0518572	0.0336628	4.04183	0.000950993	0.184533	0.136794	1.15062	1.37082	0.199261	0.691886	0.59944	41.1719	8.15495	7.43448e-06	0.0119982	0.00733694	-6.26161	-3.09214	0.0116057	0.0388077	0.0277228	5.71455	3.44309	0.00539951	0.0339741	0.0217712	3.52336	6.61431	3.68167	5.82949	4.95736	6.03857	5.08596	2.87411	2.45044	2.26006	3.07989
19698_at	19698	5971	Relb	avian reticuloendotheliosis viral (v-rel) oncogene related B	GO:0003677: DNA binding, GO:0003700: sequence-specific DNA binding transcription factor activity, GO:0005515: protein binding, GO:0005634: nucleus, GO:0005737: cytoplasm, GO:0005829: cytosol, GO:0005856: cytoskeleton, GO:0006351: transcription, DNA-dependent, GO:0006355: regulation of transcription, DNA-dependent, GO:0010628: positive regulation of gene expression, GO:0019882: antigen processing …	04010: MAPK signaling pathway, 04380: Osteoclast differentiation	-2.36714	0.0301576	0.0639159	0.0513201	-0.0208374	0.98362	0.995228	0.994209	4.03888	0.000956886	0.184533	0.136794	-1.34718	-2.56015	0.0275577	0.396621	0.289416	1.30069	3.18271	0.00924164	0.309698	0.252748	-1.70991	-6.35645	8.87298e-05	0.00125647	0.000756447	1.02477	0.29408	0.774106	0.861462	0.839284	5.26315	5.41295	5.49888	4.81587	4.63525	5.24905	5.08252	4.7608	4.65235	4.41702	4.63269
75141_at	75141	23551	Rasd2	RASD family, member 2	GO:0000166: nucleotide binding, GO:0001963: synaptic transmission, dopaminergic, GO:0003924: GTPase activity, GO:0005525: GTP binding, GO:0005622: intracellular, GO:0005886: plasma membrane, GO:0006184: GTP catabolic process, GO:0007165: signal transduction, GO:0007264: small GTPase mediated signal transduction, GO:0007610: behavior, GO:0007626: locomotory behavior, GO:0007626: locomotory behavio…		-2.13747	0.047505	0.0911306	0.0755781	-3.81116	0.00141376	0.102107	0.0678698	4.0378	0.000959052	0.184533	0.136794	-2.68997	-5.5068	0.000224599	0.106275	0.0637239	-1.16718	-1.86441	0.0905038	0.484659	0.435739	-2.20209	-7.42358	2.45363e-05	0.000549592	0.000327505	1.04658	0.512906	0.618037	0.752569	0.716194	6.18674	5.58808	6.04042	4.00541	4.03672	4.84881	4.96741	4.78534	4.91522	4.87634	4.69841
19752_at	19752	6035	Rnase1	ribonuclease, RNase A family, 1 (pancreatic)	GO:0004518: nuclease activity, GO:0004519: endonuclease activity, GO:0008152: metabolic process, GO:0016787: hydrolase activity, GO:0090305: nucleic acid phosphodiester bond hydrolysis		-3.56249	0.00242105	0.00888283		-1.65686	0.11603	0.470482		4.03024	0.000974391	0.184665		-1.71232	-4.33518	0.00134548	0.18216		1.12504	1.15247	0.27475	0.64842		-2.1494	-7.67056	1.85689e-05	0.000470774		-1.11574	-0.807692	0.43618	0.605883		2.67094	2.64105	2.75364	1.48011	1.77398	2.16789	2.12576	1.84332	1.50894	1.67415	1.24974
15502_at	15502	3301	Dnaja1	DnaJ (Hsp40) homolog, subfamily A, member 1	GO:0005524: ATP binding, GO:0006457: protein folding, GO:0007283: spermatogenesis, GO:0009408: response to heat, GO:0016020: membrane, GO:0030317: sperm motility, GO:0030521: androgen receptor signaling pathway, GO:0031072: heat shock protein binding, GO:0042769: DNA damage response, detection of DNA damage, GO:0046872: metal ion binding, GO:0050750: low-density lipoprotein particle receptor bind…	04141: Protein processing in endoplasmic reticulum	-0.323395	0.750371	0.806492	0.793768	-0.327723	0.747154	0.910158	0.887796	4.01175	0.00101292	0.187733	0.139126	-1.34046	-2.71882	0.0208919	0.357989	0.261307	1.2297	2.65844	0.0231038	0.375161	0.318664	-1.34798	-3.77913	0.00370741	0.0169907	0.0112604	1.22284	2.03136	0.0667803	0.182091	0.137912	5.21337	5.40972	5.39935	5.08607	4.85317	4.63205	5.06615	4.97088	4.92807	4.75422	4.98642
71893_at	71893	124056	Noxo1	NADPH oxidase organizer 1	GO:0005886: plasma membrane, GO:0006801: superoxide metabolic process, GO:0007154: cell communication, GO:0008289: lipid binding, GO:0016020: membrane, GO:0016176: superoxide-generating NADPH oxidase activator activity, GO:0019899: enzyme binding, GO:0022617: extracellular matrix disassembly, GO:0035091: phosphatidylinositol binding, GO:0043020: NADPH oxidase complex		-6.84776	2.95387e-06	4.09996e-05	2.45478e-05	3.20854	0.00519271	0.164811	0.115602	4.00134	0.00103529	0.189962	0.140252	1.01295	0.0600753	0.953233	0.992983	0.988968	1.854	6.86746	3.46004e-05	0.0207652	0.0131606	-2.83411	-10.8008	8.90845e-07	8.34745e-05	4.9309e-05	-1.54845	-3.85549	0.00261481	0.0205196	0.0128651	5.05502	5.19726	5.46207	5.0238	5.02269	5.50069	5.44861	3.91536	3.52582	3.72438	3.78813
12877_at	12877	64506	Cpeb1	cytoplasmic polyadenylation element binding protein 1	GO:0000166: nucleotide binding, GO:0003676: nucleic acid binding, GO:0003723: RNA binding, GO:0003729: mRNA binding, GO:0005515: protein binding, GO:0005737: cytoplasm, GO:0005886: plasma membrane, GO:0006397: mRNA processing, GO:0006417: regulation of translation, GO:0007130: synaptonemal complex assembly, GO:0016020: membrane, GO:0030054: cell junction, GO:0030529: ribonucleoprotein complex, GO…	04114: Oocyte meiosis, 04320: Dorso-ventral axis formation, 04914: Progesterone-mediated oocyte maturation	-2.05698	0.055495	0.10302	0.0864448	-2.48107	0.0239464	0.272012	0.207975	3.99917	0.00104002	0.189962	0.140252	-1.79815	-4.27048	0.00149362	0.184371	0.120408	1.02696	0.310562	0.762226	0.915046	0.905913	-1.76732	-7.90774	1.42971e-05	0.00040446	0.000239914	1.04487	0.524934	0.609919	0.746329	0.709222	4.67158	4.66782	4.77468	3.46351	3.59931	4.36874	3.83106	3.90023	3.78568	3.89827	3.94693
16819_at	16819	3934	Lcn2	lipocalin 2	GO:0002020: protease binding, GO:0005215: transporter activity, GO:0005506: iron ion binding, GO:0005515: protein binding, GO:0005576: extracellular region, GO:0005615: extracellular space, GO:0005829: cytosol, GO:0006810: transport, GO:0006811: ion transport, GO:0006915: apoptotic process, GO:0009615: response to virus, GO:0009635: response to herbicide, GO:0010628: positive regulation of gene e…		-5.28016	6.28315e-05	0.00046234	0.000282225	3.05724	0.00717742	0.182741	0.130318	3.97286	0.00109908	0.193185	0.141108	1.08963	-0.0889786	0.930788	0.989182	0.983496	4.9613	5.71153	0.000163713	0.0422668	0.0267879	-11.7971	-7.38419	2.56674e-05	0.000565534	0.000336947	-2.59096	-3.77414	0.00301305	0.0226775	0.0143072	12.1932	11.6772	11.651	11.9014	12.8929	11.0375	11.399	7.19838	9.08747	8.8737	6.68541
17384_at	17384	4319	Mmp10	matrix metallopeptidase 10	GO:0004222: metalloendopeptidase activity, GO:0005509: calcium ion binding, GO:0005576: extracellular region, GO:0005578: proteinaceous extracellular matrix, GO:0006508: proteolysis, GO:0008152: metabolic process, GO:0008233: peptidase activity, GO:0008237: metallopeptidase activity, GO:0008270: zinc ion binding, GO:0016787: hydrolase activity, GO:0030334: regulation of cell migration, GO:0030574…		-5.03145	0.000105016	0.000702386	0.000431209	-3.20571	0.0052243	0.164811	0.115668	3.96708	0.0011125	0.193185	0.141108	-2.56226	-5.18894	0.00035806	0.133699	0.0810674	-1.09601	-0.795174	0.444157	0.75509	0.727634	-3.60985	-11.7677	4.04881e-07	5.15426e-05	3.04874e-05	-1.54412	-2.1244	0.0568317	0.163637	0.122334	5.0143	5.26494	5.10642	3.1015	3.3584	4.47113	3.77978	3.12381	3.02369	3.23248	3.65714
100526516_at	100526516		Mir3059	microRNA 3059			-4.11168	0.000738875	0.00339793		-2.29193	0.0350537	0.309371		3.96053	0.00112791	0.193185		-1.542	-4.62989	0.00084214	0.173676		1.02079	0.356765	0.72835	0.900736		-1.76877	-5.86833	0.000167566	0.00191116		-1.1237	-1.47269	0.168525	0.330999		1.98558	2.05265	2.12467	1.51578	1.50539	1.33321	1.35856	1.18335	1.52044	1.23106	0.935726
56838_at	56838	56477	Ccl28	chemokine (C-C motif) ligand 28	GO:0005125: cytokine activity, GO:0005576: extracellular region, GO:0005615: extracellular space, GO:0006935: chemotaxis, GO:0006955: immune response, GO:0007204: elevation of cytosolic calcium ion concentration, GO:0008009: chemokine activity	04060: Cytokine-cytokine receptor interaction, 04062: Chemokine signaling pathway, 04672: Intestinal immune network for IgA production	-4.47895	0.000336276	0.00179352	0.00112756	3.16197	0.00573788	0.171361	0.121247	3.94738	0.00115951	0.193185	0.142151	1.05625	0.0496871	0.961312	0.994025	0.990306	4.1084	6.04617	0.000102496	0.0322938	0.0202723	-5.94982	-9.05228	4.37957e-06	0.000200868	0.00011886	-1.52967	-1.838	0.0928627	0.225024	0.175929	7.74127	7.79078	8.40156	8.66936	8.34723	7.44178	7.51401	4.79901	5.81257	5.88355	4.9201
69576_at	69576	255798	2310010M20Rik	RIKEN cDNA 2310010M20 gene	GO:0003674: molecular_function, GO:0005575: cellular_component, GO:0008150: biological_process		-0.388116	0.702785	0.766387		0.191739	0.850236	0.947941		3.94638	0.00116196	0.193185		-1.34283	-2.44269	0.0338081	0.424707		1.31967	3.14264	0.00990875	0.316152		-1.41589	-3.04681	0.0125309	0.0410093		1.25157	2.42515	0.0334482	0.115177		2.12301	2.43212	2.68878	1.82878	2.00988	2.16843	2.00391	1.95334	1.96088	1.64372	2.12618
118453_at	118453	79148	Mmp28	matrix metallopeptidase 28 (epilysin)	GO:0004222: metalloendopeptidase activity, GO:0005575: cellular_component, GO:0006508: proteolysis, GO:0008233: peptidase activity, GO:0008237: metallopeptidase activity, GO:0016787: hydrolase activity, GO:0046872: metal ion binding		-2.9707	0.00862839	0.0240238		0.0663839	0.947853	0.981753		3.94405	0.00116767	0.193185		-1.38499	-2.41635	0.0353906	0.430659		1.34684	3.57094	0.00473223	0.242905		-1.95241	-6.44112	7.97177e-05	0.00116824		-1.04667	-0.285097	0.780802	0.865725		3.19264	3.67635	3.33709	3.25925	2.53132	2.8372	3.05942	2.69623	2.40366	2.30965	2.36341
74646_at	74646	80176	Spsb1	splA/ryanodine receptor domain and SOCS box containing 1	GO:0005737: cytoplasm, GO:0035556: intracellular signal transduction		-3.28334	0.00442178	0.0142818	0.0100187	-1.10661	0.283998	0.646303	0.588219	3.91811	0.00123309	0.193428	0.144809	-1.44648	-3.09338	0.0108714	0.304473	0.216757	1.14691	2.04428	0.0668912	0.453701	0.401889	-1.77757	-6.68241	5.90433e-05	0.000964699	0.000579368	-1.07148	-0.550422	0.592898	0.734018	0.696583	6.35851	6.52285	6.2266	6.14844	5.48569	5.87607	5.78002	5.67098	5.48438	5.37538	5.62835
100526509_at	100526509		Mir3104	microRNA 3104			-0.73419	0.472917	0.563903		-1.38291	0.184729	0.55333		3.91657	0.00123709	0.193428		-1.59837	-3.88835	0.0027988	0.217561		1.13207	1.39118	0.193011	0.582714		-1.49005	-3.57272	0.00519785	0.0217208		1.21436	1.97503	0.0735737	0.193278		1.9774	2.09818	2.31005	1.29967	1.13458	1.65074	1.6763	1.52148	1.14628	1.72869	1.76296
23962_at	23962		Oasl2	2'-5' oligoadenylate synthetase-like 2	GO:0001730: 2'-5'-oligoadenylate synthetase activity, GO:0003725: double-stranded RNA binding, GO:0005575: cellular_component		-6.68208	4.0176e-06	5.19322e-05	3.11375e-05	4.36263	0.000431094	0.0560558	0.0365712	3.90039	0.00127992	0.193428	0.144809	1.21641	1.31919	0.215384	0.708029	0.617884	3.3551	7.26171	2.11735e-05	0.014825	0.00923789	-5.17464	-12.1058	3.11457e-07	4.50482e-05	2.65113e-05	-1.87609	-3.82879	0.00273911	0.0211916	0.0133045	7.33541	6.50566	7.15194	7.52644	6.88097	7.29126	7.50065	4.76362	4.78477	4.41176	4.6813
18703_at	18703	5284	Pigr	polymeric immunoglobulin receptor	GO:0005154: epidermal growth factor receptor binding, GO:0005576: extracellular region, GO:0005886: plasma membrane, GO:0016020: membrane, GO:0016021: integral to membrane, GO:0030133: transport vesicle, GO:0055038: recycling endosome membrane	04672: Intestinal immune network for IgA production	-9.23246	5.26823e-08	1.8703e-06	1.11007e-06	2.5289	0.0217168	0.26039	0.197954	3.89691	0.00128931	0.193428	0.144809	-1.08563	-0.650642	0.529376	0.880906	0.835666	2.63496	5.11998	0.000389297	0.0707224	0.0448473	-9.91411	-13.0774	1.51703e-07	2.94141e-05	1.73105e-05	-3.46574	-6.96928	2.21531e-05	0.000882133	0.00052579	9.59355	9.52464	9.9969	9.74824	10.0796	9.12126	9.25127	5.67287	6.85511	6.64655	6.1979
19039_at	19039	3959	Lgals3bp	lectin, galactoside-binding, soluble, 3 binding protein	GO:0005044: scavenger receptor activity, GO:0005044: scavenger receptor activity, GO:0005515: protein binding, GO:0005576: extracellular region, GO:0005578: proteinaceous extracellular matrix, GO:0006898: receptor-mediated endocytosis, GO:0006898: receptor-mediated endocytosis, GO:0007155: cell adhesion, GO:0016020: membrane		-6.62957	4.4324e-06	5.6114e-05	3.36835e-05	1.80926	0.0882691	0.426391	0.357657	3.89355	0.00129846	0.193428	0.144809	-1.13251	-1.20631	0.254397	0.734265	0.648953	1.5998	4.32697	0.00134414	0.140001	0.0954015	-2.68371	-12.5784	2.1814e-07	3.54843e-05	2.08829e-05	-1.48124	-3.34161	0.00646823	0.0383802	0.024704	7.97984	7.79001	7.84997	7.90639	7.79271	7.44371	7.59738	6.60025	6.41315	6.44265	6.33592
382090_at	382090	22832	4922501C03Rik	RIKEN cDNA 4922501C03 gene	GO:0005515: protein binding, GO:0005634: nucleus, GO:0005737: cytoplasm, GO:0005813: centrosome, GO:0005856: cytoskeleton, GO:0005886: plasma membrane, GO:0007049: cell cycle, GO:0007067: mitosis, GO:0008150: biological_process, GO:0051301: cell division		1.86075	0.0803043	0.137653	0.118732	-0.892124	0.384878	0.721242	0.671577	3.89325	0.00129929	0.193428	0.144809	-1.37867	-2.8186	0.0175506	0.340615	0.247085	1.15724	2.32019	0.041662	0.414059	0.35744	-1.10887	-1.34774	0.207931	0.314573	0.284176	1.43881	3.74257	0.00318399	0.0235423	0.0148666	6.45116	6.26072	6.24618	5.52395	6.07636	6.01837	5.75157	6.27106	6.12056	6.17022	6.1264
71830_at	71830	204474	Pdilt	protein disulfide isomerase-like, testis expressed	GO:0003674: molecular_function, GO:0005575: cellular_component, GO:0005783: endoplasmic reticulum, GO:0007275: multicellular organismal development, GO:0007283: spermatogenesis, GO:0008150: biological_process, GO:0008152: metabolic process, GO:0016853: isomerase activity, GO:0030154: cell differentiation, GO:0045454: cell redox homeostasis		-3.62431	0.00211807	0.00794583		-0.806826	0.430997	0.748847		3.89272	0.00130073	0.193428		-1.36884	-2.91448	0.0148458	0.32693		1.15929	2.03433	0.0680302	0.454484		-1.71307	-5.97033	0.000146334	0.00175392		-1.07952	-0.895943	0.389238	0.564714		2.60805	2.73339	2.32342	1.95319	2.1978	2.08152	2.20132	1.90195	1.75281	1.82456	1.66343
17002_at	17002	4057	Ltf	lactotransferrin	GO:0005576: extracellular region, GO:0005737: cytoplasm, GO:0006508: proteolysis, GO:0006810: transport, GO:0006811: ion transport, GO:0006826: iron ion transport, GO:0006879: cellular iron ion homeostasis, GO:0008199: ferric iron binding, GO:0008201: heparin binding, GO:0008233: peptidase activity, GO:0008236: serine-type peptidase activity, GO:0016787: hydrolase activity, GO:0030141: secretory …		-8.12288	3.13398e-07	7.21853e-06	4.28734e-06	2.31583	0.0334231	0.303139	0.236506	3.88464	0.00132304	0.193428	0.144809	-1.1772	-0.979802	0.349405	0.789807	0.720934	4.01014	4.83343	0.000602975	0.0932101	0.0607854	-26.0745	-10.5497	1.10422e-06	9.16117e-05	5.40912e-05	-5.52342	-6.85999	2.56158e-05	0.000970935	0.000579245	11.5805	10.8567	11.2954	11.3775	11.6678	10.1562	10.4098	5.02988	7.2991	7.01112	5.92583
109272_at	109272	4604	Mybpc1	myosin binding protein C, slow-type	GO:0005200: structural constituent of cytoskeleton, GO:0005856: cytoskeleton, GO:0006936: muscle contraction		-1.03641	0.31464	0.407503	0.383789	-3.31031	0.0041724	0.153667	0.107519	3.88171	0.00133121	0.193428	0.144809	-3.79538	-8.61161	4.68927e-06	0.0196996	0.0115934	-1.1483	-0.608541	0.555795	0.819014	0.797524	-2.27977	-4.59345	0.00103063	0.00684536	0.00428247	1.4498	1.67167	0.12242	0.268879	0.216305	5.26426	5.31796	5.46849	3.47774	2.74013	3.4705	3.82409	4.57803	4.15515	4.37771	3.20368
78170_at	78170		4930486F22Rik	RIKEN cDNA 4930486F22 gene			-0.0434518	0.965852	0.975332		2.15164	0.0462122	0.342004		3.87832	0.00134073	0.193428		-1.07202	-0.722764	0.485745	0.860466		1.47583	5.03823	0.00044053	0.0761824		-1.28474	-3.30503	0.00811069	0.0298886		1.23147	2.1598	0.0534277	0.157031		1.30222	1.28921	1.41062	1.03063	1.22356	1.17197	1.47616	0.892899	0.959944	1.12494	0.904377
627805_at	627805		Vmn2r108	vomeronasal 2, receptor 108	GO:0003674: molecular_function, GO:0004871: signal transducer activity, GO:0004930: G-protein coupled receptor activity, GO:0005575: cellular_component, GO:0005886: plasma membrane, GO:0007165: signal transduction, GO:0007186: G-protein coupled receptor signaling pathway, GO:0008150: biological_process, GO:0016020: membrane, GO:0016021: integral to membrane		-3.14501	0.00595007	0.0179856		-0.529123	0.603615	0.844074		3.87729	0.00134364	0.193428		-1.46096	-3.028	0.0121806	0.310141		1.24618	2.32975	0.0409781	0.412004		-1.90085	-5.7015	0.000209776	0.00222169		-1.04406	-0.505546	0.623031	0.755819		2.71545	2.11304	2.23485	1.6855	1.93066	1.75531	1.93864	1.47829	1.3212	1.64022	1.34552
100217467_at	100217467		Snora5c	small nucleolar RNA, H/ACA box 5C	GO:0003674: molecular_function, GO:0005575: cellular_component, GO:0008150: biological_process		-3.82605	0.00136897	0.00558353	0.0036862	0.192649	0.849535	0.947783	0.935263	3.87661	0.00134557	0.193428	0.144809	-1.32435	-2.24378	0.0476924	0.467029	0.354443	1.34227	3.65391	0.00410859	0.230893	0.176491	-2.03793	-8.40384	8.43053e-06	0.000289116	0.000171079	-1.14643	-1.01555	0.331397	0.509311	0.455223	9.58454	9.32856	9.49996	8.76445	8.75382	9.41266	9.23163	8.50758	8.5405	8.48605	8.2377
71952_at	71952	79697	2410016O06Rik	RIKEN cDNA 2410016O06 gene	GO:0003723: RNA binding, GO:0005506: iron ion binding, GO:0005515: protein binding, GO:0005634: nucleus, GO:0005730: nucleolus, GO:0006338: chromatin remodeling, GO:0006351: transcription, DNA-dependent, GO:0006355: regulation of transcription, DNA-dependent, GO:0016491: oxidoreductase activity, GO:0016568: chromatin modification, GO:0016702: oxidoreductase activity, acting on single donors with …		-1.41146	0.17629	0.257076	0.233991	-0.284866	0.779215	0.923945	0.904379	3.87364	0.00135399	0.193428	0.144809	-1.29997	-2.48024	0.0316719	0.41599	0.307497	1.20511	2.6395	0.0238822	0.375919	0.32099	-1.4258	-4.40141	0.00138253	0.00839309	0.00532135	1.09875	1.04968	0.316111	0.494073	0.439443	5.88942	6.11718	5.86229	5.68227	5.68227	5.62177	5.31193	5.34857	5.42329	5.57254	5.44303
258687_at	258687		Olfr1454	olfactory receptor 1454	GO:0004871: signal transducer activity, GO:0004930: G-protein coupled receptor activity, GO:0004984: olfactory receptor activity, GO:0007165: signal transduction, GO:0007186: G-protein coupled receptor signaling pathway, GO:0007608: sensory perception of smell, GO:0016021: integral to membrane, GO:0050911: detection of chemical stimulus involved in sensory perception of smell	04740: Olfactory transduction	-3.18546	0.00545625	0.0168253		0.0221923	0.982555	0.994869		3.86878	0.00136792	0.193428		-1.68472	-3.34146	0.00707699	0.273155		1.56187	2.69618	0.0216267	0.36665		-2.99186	-6.04946	0.000131862	0.00163167		-1.13702	-0.617002	0.549639	0.70027		3.82885	3.55892	3.88008	2.93424	2.53544	3.62745	2.68407	2.58966	2.54326	1.33914	1.91383
30794_at	30794	8572	Pdlim4	PDZ and LIM domain 4	GO:0008270: zinc ion binding, GO:0046872: metal ion binding		-5.3217	5.77061e-05	0.000430719	0.000262822	-2.96218	0.00878599	0.196156	0.140292	3.86436	0.00138071	0.193428	0.144809	-1.55225	-4.22768	0.00160099	0.184371	0.120553	-1.02351	-0.376572	0.714008	0.893853	0.882478	-1.86052	-8.73976	5.9762e-06	0.000237222	0.00014027	-1.22677	-2.14797	0.0545435	0.159374	0.118636	6.8303	6.80975	6.74427	6.1328	6.1328	5.92228	6.41303	5.88354	5.95501	5.94205	5.81319
229003_at	229003	85441	BC006779	cDNA sequence BC006779	GO:0000166: nucleotide binding, GO:0003674: molecular_function, GO:0005524: ATP binding, GO:0005575: cellular_component, GO:0008150: biological_process		-5.60808	3.22785e-05	0.000265452	0.000160948	2.99405	0.00821096	0.191179	0.136191	3.86083	0.00139101	0.193428	0.144809	-1.00058	-0.0816779	0.936452	0.989777	0.984712	1.99363	5.77494	0.000149635	0.0414471	0.0264247	-2.79695	-12.5911	2.16101e-07	3.54843e-05	2.08829e-05	-1.40213	-2.49895	0.0293249	0.105692	0.0747176	5.98472	5.71394	5.99841	6.0526	5.46352	5.95728	6.06362	4.46908	4.40093	4.30997	4.4968
77889_at	77889	81606	Lbh	limb-bud and heart	GO:0005634: nucleus, GO:0005730: nucleolus, GO:0005737: cytoplasm, GO:0006351: transcription, DNA-dependent, GO:0006355: regulation of transcription, DNA-dependent, GO:0007275: multicellular organismal development, GO:0043231: intracellular membrane-bounded organelle, GO:0045893: positive regulation of transcription, DNA-dependent		-1.93201	0.0703337	0.124	0.106105	-2.68789	0.0156391	0.234224	0.173646	3.8589	0.00139665	0.193428	0.144809	-2.23797	-4.94203	0.000519537	0.143525	0.0893202	1.0024	-0.0594207	0.953735	0.986391	0.98441	-2.06893	-6.53946	7.04747e-05	0.00107595	0.00064652	1.0843	0.641454	0.534207	0.688335	0.645784	8.028	8.18282	7.67893	6.24018	6.6456	7.3517	6.8031	7.0573	7.10674	6.63491	6.8722
239017_at	239017	55753	Ogdhl	oxoglutarate dehydrogenase-like	GO:0003674: molecular_function, GO:0005575: cellular_component, GO:0008150: biological_process	00020: Citrate cycle (TCA cycle), 00310: Lysine degradation, 00380: Tryptophan metabolism, 01100: Metabolic pathways	-1.07893	0.295808	0.38813	0.36401	-1.87534	0.0781661	0.409438	0.339275	3.85583	0.00140572	0.193621	0.144809	-1.8201	-3.9615	0.00247829	0.208906	0.137059	1.10961	1.05274	0.31614	0.675532	0.641177	-1.70148	-6.20408	0.000107843	0.00141873	0.000856392	1.18697	1.326	0.211392	0.383335	0.326884	5.03595	5.03901	5.26173	3.91937	3.74178	4.76112	4.36441	4.4842	4.16219	4.29058	4.43841
12876_at	12876	1363	Cpe	carboxypeptidase E	GO:0003214: cardiac left ventricle morphogenesis, GO:0004180: carboxypeptidase activity, GO:0004180: carboxypeptidase activity, GO:0004181: metallocarboxypeptidase activity, GO:0005576: extracellular region, GO:0005615: extracellular space, GO:0005794: Golgi apparatus, GO:0006508: proteolysis, GO:0006518: peptide metabolic process, GO:0008233: peptidase activity, GO:0008237: metallopeptidase acti…	04940: Type I diabetes mellitus	-0.98434	0.338859	0.432097	0.409035	-2.18547	0.0432563	0.334864	0.264713	3.83456	0.00147009	0.198943	0.147903	-1.95806	-4.16595	0.00177029	0.192005	0.127122	1.06332	0.646793	0.531683	0.805056	0.782361	-1.72933	-5.73686	0.000199957	0.00214839	0.00130381	1.20396	1.43182	0.179656	0.345023	0.289582	8.48055	8.28327	8.18543	6.70466	7.20937	7.92947	7.29936	7.70384	7.34362	7.35558	7.68199
14038_at	14038		Wfdc18	WAP four-disulfide core domain 18	GO:0005576: extracellular region, GO:0010466: negative regulation of peptidase activity, GO:0030414: peptidase inhibitor activity		-9.34509	4.43211e-08	1.65016e-06	9.7982e-07	-1.25198	0.227662	0.596387	0.534864	3.83267	0.00147593	0.198943	0.147903	-1.53703	-3.07171	0.0112888	0.306003	0.217495	1.15441	2.36179	0.0387629	0.409439	0.352849	-3.67186	-15.3109	3.43368e-08	1.43764e-05	8.46068e-06	-2.06939	-5.7333	0.000125453	0.00266399	0.00159466	5.40233	5.03356	5.33865	4.24959	4.41616	5.12477	4.64044	3.48459	3.36322	3.37364	3.33573
19784_at	19784		Rprl2	ribonuclease P RNA-like 2	GO:0003674: molecular_function, GO:0005575: cellular_component, GO:0008150: biological_process		-4.256	0.000541755	0.00264501	0.0016869	0.0262949	0.979331	0.993721	0.992762	3.82857	0.00148874	0.199602	0.147903	-1.40987	-2.67141	0.0226952	0.369046	0.269684	1.37464	2.89536	0.015259	0.34464	0.288257	-2.32932	-8.55428	7.21711e-06	0.000263526	0.000155764	-1.20188	-1.45821	0.1724	0.335976	0.280784	7.68837	7.23804	7.55348	6.72797	6.76431	7.27054	7.19359	6.30748	6.48717	6.14898	6.17272
11758_at	11758	9588	Prdx6	peroxiredoxin 6	GO:0000302: response to reactive oxygen species, GO:0003824: catalytic activity, GO:0004601: peroxidase activity, GO:0004602: glutathione peroxidase activity, GO:0004623: phospholipase A2 activity, GO:0005737: cytoplasm, GO:0005739: mitochondrion, GO:0005764: lysosome, GO:0005829: cytosol, GO:0006979: response to oxidative stress, GO:0008152: metabolic process, GO:0009395: phospholipid catabolic …	00360: Phenylalanine metabolism, 01100: Metabolic pathways	-0.386953	0.70363	0.767049	0.754002	-1.79004	0.0914155	0.433055	0.363937	3.82343	0.00150495	0.199731	0.147903	-1.56391	-4.24988	0.00154431	0.184371	0.120553	1.08359	0.815589	0.43289	0.749564	0.720659	-1.37167	-3.37868	0.00717127	0.0273836	0.0188916	1.23545	2.04615	0.0650968	0.178728	0.135269	7.60923	7.70969	7.92248	6.96262	7.16593	7.28917	6.98919	7.21022	7.25554	7.13647	7.55098
109292_at	109292		4631423B10Rik	RIKEN cDNA 4631423B10 gene			-3.8774	0.00122511	0.00512277	0.00336043	-1.71026	0.105547	0.458363	0.389782	3.81186	0.00154204	0.200642	0.148537	-1.52565	-4.03488	0.00219507	0.199232	0.130637	1.07924	0.900294	0.388194	0.721974	0.690878	-1.8409	-6.13774	0.000117514	0.00150664	0.000909814	-1.11804	-1.21638	0.248991	0.424949	0.369022	4.97261	4.8958	4.67191	4.12189	4.2482	4.12809	4.44864	4.21787	4.05437	3.832	3.73357
242122_at	242122	79679	Vtcn1	V-set domain containing T cell activation inhibitor 1	GO:0005102: receptor binding, GO:0005575: cellular_component, GO:0005886: plasma membrane, GO:0016020: membrane, GO:0031225: anchored to membrane, GO:0050868: negative regulation of T cell activation		-4.31377	0.000478631	0.00238568	0.0015158	1.31503	0.2061	0.574888	0.511794	3.80156	0.00157588	0.202431	0.149293	-1.22096	-1.97472	0.0754105	0.535222	0.424971	1.52303	3.42999	0.00602535	0.259849	0.20621	-2.232	-5.88559	0.000163752	0.0018873	0.0011431	-1.20028	-2.11637	0.0576326	0.165092	0.123615	8.24064	8.26203	8.56528	8.06323	8.02062	8.09904	8.1182	7.51859	7.39516	7.12214	6.63439
100862198_at	100862198		LOC100862198	uncharacterized LOC100862198			9.221	5.36214e-08	1.89563e-06	1.12506e-06	0.311735	0.759062	0.914735	0.893316	3.79803	0.00158765	0.202431	0.149293	-1.39548	-2.27538	0.0451662	0.458913	0.34732	1.42223	3.49407	0.00539745	0.247996	0.196263	2.02608	6.06202	0.00012971	0.00161373	0.000975662	4.02116	11.7601	1.26906e-07	4.77431e-05	2.80973e-05	3.23456	3.94498	3.43989	2.70774	3.2328	3.23028	3.13074	4.58717	4.38725	4.59371	4.76763
69772_at	69772	56898	Bdh2	3-hydroxybutyrate dehydrogenase, type 2	GO:0000166: nucleotide binding, GO:0003858: 3-hydroxybutyrate dehydrogenase activity, GO:0005737: cytoplasm, GO:0006635: fatty acid beta-oxidation, GO:0008152: metabolic process, GO:0016491: oxidoreductase activity, GO:0016628: oxidoreductase activity, acting on the CH-CH group of donors, NAD or NADP as acceptor, GO:0019290: siderophore biosynthetic process, GO:0051287: NAD binding, GO:0055072: i…	00072: Synthesis and degradation of ketone bodies, 00650: Butanoate metabolism, 01100: Metabolic pathways	-2.30625	0.0340682	0.0702323	0.05693	-1.2153	0.240991	0.608424	0.547402	3.79728	0.00159015	0.202431	0.149293	-2.24087	-3.75925	0.00347422	0.228645	0.149815	1.2788	1.8408	0.0941219	0.488658	0.440304	-2.98256	-6.33169	9.15691e-05	0.00128085	0.000771343	-1.04081	0.308664	0.763274	0.854855	0.831185	5.68932	5.58439	5.7842	3.72159	3.64102	5.14651	4.95204	4.66975	3.41078	3.71283	4.31853
14293_at	14293	2357	Fpr1	formyl peptide receptor 1	GO:0004871: signal transducer activity, GO:0004930: G-protein coupled receptor activity, GO:0004982: N-formyl peptide receptor activity, GO:0005886: plasma membrane, GO:0006935: chemotaxis, GO:0007165: signal transduction, GO:0007186: G-protein coupled receptor signaling pathway, GO:0007186: G-protein coupled receptor signaling pathway, GO:0016020: membrane, GO:0016021: integral to membrane	04080: Neuroactive ligand-receptor interaction, 05150: Staphylococcus aureus infection	2.41399	0.0274395	0.0592869		2.83191	0.01157	0.212509		3.78511	0.00163144	0.204231		-1.01729	-0.289022	0.778239	0.958294		2.90364	4.8793	0.000561746	0.0890587		-1.12041	-1.52875	0.157791	0.256964		2.6364	4.12358	0.00164736	0.0150666		1.59616	1.63685	1.49309	1.30898	1.13305	1.72852	1.90433	1.34437	1.35505	1.40137	1.54098
258609_at	258609		Olfr305	olfactory receptor 305	GO:0004871: signal transducer activity, GO:0004930: G-protein coupled receptor activity, GO:0004984: olfactory receptor activity, GO:0007165: signal transduction, GO:0007186: G-protein coupled receptor signaling pathway, GO:0007608: sensory perception of smell, GO:0016021: integral to membrane, GO:0050911: detection of chemical stimulus involved in sensory perception of smell	04740: Olfactory transduction	-1.5204	0.146933	0.222385		-0.259396	0.798469	0.929446		3.77928	0.00165161	0.204231		-1.26862	-2.47974	0.0316993	0.41599		1.17771	2.27016	0.0454275	0.418768		-1.38208	-3.6472	0.00459863	0.0198792		1.08103	1.00711	0.335263	0.513093		1.32134	1.16501	1.43239	0.88711	1.01069	0.956918	1.01028	0.960571	0.743346	0.991965	0.649669
19850_at	19850		Rnu3a	U3A small nuclear RNA			-4.25026	0.000548474	0.00267095	0.0017046	1.54131	0.141792	0.506894	0.437133	3.77865	0.00165379	0.204231	0.152847	-1.30215	-1.4938	0.164905	0.654224	0.556073	2.17797	4.45891	0.00108708	0.124406	0.083553	-3.76507	-8.44984	8.03751e-06	0.000282557	0.000167221	-1.32757	-1.59531	0.138608	0.291437	0.237398	10.3026	9.72311	10.5383	9.32574	9.51797	10.2576	10.08	8.52416	8.57532	7.84494	8.19825
72148_at	72148	157695	2610019F03Rik	RIKEN cDNA 2610019F03 gene	GO:0003674: molecular_function, GO:0005575: cellular_component, GO:0008150: biological_process		1.15145	0.265608	0.355922		-1.65689	0.116024	0.470482		3.77853	0.00165423	0.204231		-1.38438	-3.32219	0.00731582	0.273155		1.06978	0.97445	0.3518	0.697195		-1.14174	-1.67855	0.12464	0.216205		1.29713	3.11606	0.00968361	0.0504412		3.21567	3.34196	3.49231	2.89912	2.76308	2.88481	2.9851	3.21457	3.21456	3.08624	3.13322
17766_at	17766	4521	Nudt1	nudix (nucleoside diphosphate linked moiety X)-type motif 1	GO:0005634: nucleus, GO:0005737: cytoplasm, GO:0005759: mitochondrial matrix, GO:0006195: purine nucleotide catabolic process, GO:0006203: dGTP catabolic process, GO:0006281: DNA repair, GO:0008413: 8-oxo-7,8-dihydroguanosine triphosphate pyrophosphatase activity, GO:0008413: 8-oxo-7,8-dihydroguanosine triphosphate pyrophosphatase activity, GO:0016787: hydrolase activity, GO:0035539: 8-oxo-7,8-di…		1.08692	0.29236	0.384495	0.360445	-2.70213	0.0151823	0.232594	0.172446	3.77801	0.00165604	0.204231	0.152847	-1.8695	-4.47095	0.00108264	0.179534	0.116376	-1.01501	-0.119693	0.906991	0.969138	0.965837	-1.24433	-2.04761	0.068214	0.139465	0.115005	1.4802	3.44915	0.00534174	0.0337369	0.0216088	4.09899	4.56344	4.2993	3.70953	3.67468	3.01566	3.19972	3.89482	4.11029	4.23868	3.78349
209318_at	209318	2873	Gps1	G protein pathway suppressor 1	GO:0005515: protein binding, GO:0005634: nucleus, GO:0005737: cytoplasm, GO:0008180: signalosome, GO:0008180: signalosome, GO:0010388: cullin deneddylation		0.351171	0.729808	0.789238	0.776501	0.787876	0.441702	0.75535	0.709868	3.77693	0.00165979	0.204231	0.152847	-1.27729	-1.88056	0.0882771	0.557762	0.448592	1.46831	3.95162	0.00248951	0.186204	0.136271	-1.35645	-2.75476	0.020587	0.0586299	0.0437658	1.38263	2.82875	0.01623	0.0715724	0.0482385	6.01251	5.60561	5.73411	5.27354	5.19183	5.27467	5.90301	5.49106	5.43755	4.95845	5.46715
72205_at	72205	24139	Eml2	echinoderm microtubule associated protein like 2	GO:0003824: catalytic activity, GO:0005102: receptor binding, GO:0005737: cytoplasm, GO:0005856: cytoskeleton, GO:0005874: microtubule, GO:0008022: protein C-terminus binding, GO:0008150: biological_process, GO:0008152: metabolic process, GO:0043231: intracellular membrane-bounded organelle		-2.64576	0.017069	0.0408703	0.031399	-0.846987	0.40886	0.735597	0.68787	3.77417	0.00166949	0.204231	0.152847	-1.37131	-2.98672	0.0130887	0.314828	0.224488	1.15677	1.88364	0.0876506	0.479739	0.431285	-1.59979	-5.72447	0.00020334	0.00217201	0.00131844	-1.00851	-0.0328044	0.974411	0.984567	0.981424	5.88213	6.01515	5.98389	5.42942	5.43441	5.30861	5.80211	5.3179	5.30874	5.06279	5.42154
100217427_at	100217427		Snord52	small nucleolar RNA, C/D box 52	GO:0003674: molecular_function, GO:0005575: cellular_component, GO:0008150: biological_process		-1.25209	0.227621	0.314413	0.290804	-0.636787	0.532812	0.80769	0.766579	3.77133	0.00167952	0.204231	0.152847	-1.46069	-2.6816	0.0222951	0.367781	0.268446	1.23992	3.11232	0.0104459	0.320706	0.263528	-1.60463	-5.43967	0.000300795	0.00285899	0.0017403	1.1287	1.15367	0.272792	0.450072	0.394713	7.02922	6.69656	6.91356	5.84666	6.58969	6.68832	6.06524	6.15777	6.05403	6.34276	6.24586
78249_at	78249	221393	Gpr115	G protein-coupled receptor 115	GO:0004871: signal transducer activity, GO:0004888: transmembrane signaling receptor activity, GO:0004930: G-protein coupled receptor activity, GO:0005886: plasma membrane, GO:0007165: signal transduction, GO:0007166: cell surface receptor signaling pathway, GO:0007186: G-protein coupled receptor signaling pathway, GO:0007218: neuropeptide signaling pathway, GO:0016020: membrane, GO:0016021: inte…		-2.91782	0.00965182	0.026264		-3.18753	0.00543201	0.166568		3.77053	0.00168232	0.204231		-1.51641	-4.49069	0.00104919	0.178656		-1.03972	-0.560509	0.58692	0.833131		-1.48774	-5.16176	0.000445655	0.00376517		-1.02007	-0.259579	0.799925	0.879145		2.96639	2.83237	2.82522	2.31476	2.19865	2.36052	2.2219	2.37952	2.37021	2.14387	2.30634
68271_at	68271		4930441O14Rik	RIKEN cDNA 4930441O14 gene	GO:0003674: molecular_function, GO:0005575: cellular_component, GO:0008150: biological_process		0.815018	0.426421	0.518743		-0.733797	0.47315	0.772323		3.76741	0.00169342	0.204231		-1.40398	-2.85866	0.0163648	0.336613		1.18628	2.23768	0.048046	0.421084		-1.22692	-2.28076	0.0461138	0.104886		1.35748	3.01408	0.0116299	0.0570326		2.47903	2.17853	2.25545	1.43991	1.95894	2.03624	1.77644	2.16841	1.9827	1.80245	2.0812
54123_at	54123	3665	Irf7	interferon regulatory factor 7	GO:0000975: regulatory region DNA binding, GO:0000979: RNA polymerase II core promoter sequence-specific DNA binding, GO:0000982: RNA polymerase II core promoter proximal region sequence-specific DNA binding transcription factor activity, GO:0002819: regulation of adaptive immune response, GO:0003677: DNA binding, GO:0003700: sequence-specific DNA binding transcription factor activity, GO:0005515…	04620: Toll-like receptor signaling pathway, 04622: RIG-I-like receptor signaling pathway, 04623: Cytosolic DNA-sensing pathway, 05160: Hepatitis C	-9.38857	4.14769e-08	1.5745e-06	9.35059e-07	3.94249	0.00106436	0.0899358	0.0592679	3.76165	0.00171412	0.20526	0.153348	1.1832	0.834256	0.422867	0.83082	0.773836	3.30657	7.55152	1.49311e-05	0.0133784	0.00845655	-9.22954	-15.9843	2.28152e-08	1.06496e-05	6.26741e-06	-3.30262	-6.26133	5.833e-05	0.00161103	0.000963946	8.05792	7.18206	7.76504	7.92195	7.29271	7.93053	8.4487	4.54288	4.46969	4.26111	4.71476
72333_at	72333	23022	Palld	palladin, cytoskeletal associated protein	GO:0003779: actin binding, GO:0005634: nucleus, GO:0005634: nucleus, GO:0005737: cytoplasm, GO:0005856: cytoskeleton, GO:0005884: actin filament, GO:0005884: actin filament, GO:0030054: cell junction, GO:0042995: cell projection		1.78477	0.0922941	0.153902	0.133945	-2.30329	0.0342695	0.307455	0.240058	3.75906	0.00172349	0.20526	0.153348	-1.73811	-4.38269	0.00124659	0.18216	0.119185	1.0361	0.338565	0.741627	0.906328	0.896521	-1.1421	-1.3544	0.205871	0.312212	0.281881	1.57678	3.93179	0.00229071	0.0187771	0.0117336	6.55269	6.48076	6.86557	5.71394	5.4845	6.07933	6.02466	6.27806	6.38846	6.67749	6.4306
621852_at	621852		Rhox3f	reproductive homeobox 3F	GO:0003677: DNA binding, GO:0005575: cellular_component, GO:0005634: nucleus, GO:0008150: biological_process		0.864765	0.3993	0.492646		1.05496	0.306322	0.665504		3.75424	0.0017411	0.206038		-1.20704	-1.81194	0.0989019	0.57439		1.43405	3.44901	0.00583155	0.257967		-1.22931	-2.34943	0.041052	0.0962474		1.40808	3.01064	0.011702	0.0571184		1.16176	1.26854	1.0029	0.623434	0.955936	0.992098	0.908337	0.741387	1.06509	0.701913	0.865945
57430_at	57430		Sult3a1	sulfotransferase family 3A, member 1	GO:0008152: metabolic process, GO:0016740: transferase activity		-1.42485	0.172441	0.252823		-1.32173	0.203905	0.572723		3.74182	0.00178728	0.206115		-1.32347	-3.03338	0.0120672	0.309996		1.08428	1.22854	0.246133	0.624925		-1.33082	-3.73219	0.00400182	0.0179547		1.0783	0.959162	0.357838	0.535724		1.14651	1.2863	1.25219	0.883512	0.73665	0.893335	0.781245	0.693629	0.874575	0.753383	0.934753
67773_at	67773	84148	Kat8	K(lysine) acetyltransferase 8	GO:0000123: histone acetyltransferase complex, GO:0000776: kinetochore, GO:0004402: histone acetyltransferase activity, GO:0005634: nucleus, GO:0005694: chromosome, GO:0006351: transcription, DNA-dependent, GO:0006355: regulation of transcription, DNA-dependent, GO:0008134: transcription factor binding, GO:0016407: acetyltransferase activity, GO:0016407: acetyltransferase activity, GO:0016568: ch…		3.13056	0.00613703	0.0184111	0.0131784	0.144359	0.886928	0.962059	0.952021	3.73816	0.0018011	0.206115	0.155251	-1.20111	-1.94941	0.0786856	0.539687	0.430709	1.19113	2.77422	0.018864	0.358996	0.305608	1.008	0.0933917	0.927465	0.949194	0.943429	1.44213	4.57903	0.000766825	0.00882641	0.00540933	5.68449	5.64551	5.75597	5.44889	5.51214	5.2613	5.49107	5.59446	5.71293	5.82057	5.69327
20941_at	20941		Svs4	seminal vesicle secretory protein 4	GO:0005576: extracellular region		-0.317482	0.754774	0.810016		-0.219795	0.828669	0.940831		3.73169	0.00182585	0.206115		-1.25956	-2.42494	0.0348671	0.429152		1.19066	2.3044	0.0428168	0.41564		-1.27089	-3.32844	0.00779903	0.029033		1.18004	1.80224	0.0986084	0.233954		1.7441	1.67053	1.74427	1.36428	1.5122	1.20785	1.44651	1.29729	1.40738	1.31756	1.468
17912_at	17912	4430	Myo1b	myosin IB	GO:0000146: microfilament motor activity, GO:0000166: nucleotide binding, GO:0003774: motor activity, GO:0003779: actin binding, GO:0005516: calmodulin binding, GO:0005524: ATP binding, GO:0005546: phosphatidylinositol-4,5-bisphosphate binding, GO:0005547: phosphatidylinositol-3,4,5-trisphosphate binding, GO:0005737: cytoplasm, GO:0005886: plasma membrane, GO:0005903: brush border, GO:0008152: me…		-0.0569166	0.95528	0.967338	0.964652	-0.175272	0.862952	0.952813	0.940492	3.73015	0.00183179	0.206115	0.155761	-1.29811	-2.56508	0.0273216	0.395559	0.288873	1.2145	2.33692	0.0404721	0.411489	0.354579	-1.28111	-2.65711	0.0243162	0.0659474	0.0498145	1.23063	2.34012	0.0388993	0.127364	0.0920324	7.35195	6.99674	7.26862	6.76955	6.802	6.85538	6.91733	6.72693	6.8837	7.05685	6.73152
20499_at	20499	10723	Slc12a7	solute carrier family 12, member 7	GO:0006810: transport, GO:0006811: ion transport, GO:0006813: potassium ion transport, GO:0006821: chloride transport, GO:0006884: cell volume homeostasis, GO:0015293: symporter activity, GO:0015377: cation:chloride symporter activity, GO:0015379: potassium:chloride symporter activity, GO:0016020: membrane, GO:0016021: integral to membrane, GO:0034220: ion transmembrane transport, GO:0055085: tra…	04966: Collecting duct acid secretion	-1.77858	0.0933381	0.155387	0.135309	-2.38785	0.0289263	0.289169	0.223537	3.72756	0.00184183	0.206115	0.155761	-1.50429	-4.09459	0.00198966	0.194592	0.128006	1.01238	0.200026	0.845291	0.946962	0.940518	-1.43321	-4.0461	0.00241306	0.0125824	0.00816313	1.0626	0.73493	0.477573	0.642045	0.596122	5.89028	5.62998	5.65862	5.24332	5.19313	4.98516	5.13357	5.0766	5.39973	5.27654	5.06704
79560_at	79560	134510	Ublcp1	ubiquitin-like domain containing CTD phosphatase 1	GO:0003674: molecular_function, GO:0004721: phosphoprotein phosphatase activity, GO:0005634: nucleus, GO:0005730: nucleolus, GO:0008150: biological_process, GO:0008152: metabolic process, GO:0016311: dephosphorylation, GO:0016787: hydrolase activity		3.02634	0.00766583	0.0219374	0.015922	-0.882191	0.390073	0.72434	0.675167	3.71173	0.00190434	0.210529	0.158702	-2.06627	-3.31618	0.00739199	0.273155	0.188611	1.34949	2.16976	0.053998	0.434899	0.381432	-1.08653	0.00637931	0.995037	0.996768	0.996717	2.56633	7.26253	1.51138e-05	0.000706786	0.000421424	3.11227	2.95618	4.28907	2.52354	2.47291	2.63748	2.50566	3.50521	3.26486	3.35426	3.69285
546901_at	546901		Vmn1r34	vomeronasal 1 receptor 34	GO:0003674: molecular_function, GO:0005575: cellular_component, GO:0008150: biological_process		-0.545443	0.59259	0.672224		-0.314638	0.756896	0.913764		3.70687	0.00192392	0.210877		-1.30284	-2.54893	0.0281018	0.399737		1.20162	2.32417	0.0413758	0.412874		-1.32986	-3.42095	0.00668361	0.0260486		1.1772	1.73328	0.110607	0.251871		3.82392	3.60684	3.86175	3.20948	3.59693	3.38296	3.33022	3.28992	3.52367	3.24485	3.35452
66784_at	66784		Fam187a	family with sequence similarity 187, member A	GO:0003674: molecular_function, GO:0005575: cellular_component, GO:0008150: biological_process, GO:0016020: membrane, GO:0016021: integral to membrane		-2.13313	0.0479076	0.0917181		-1.28446	0.216344	0.585892		3.70474	0.00193258	0.210877		-1.3944	-3.30041	0.00759581	0.274566		1.10724	1.27917	0.228446	0.611128		-1.48731	-4.61891	0.000991652	0.00667617		1.03807	0.389943	0.703933	0.812815		2.73774	2.92961	3.05335	2.58286	2.38703	2.34833	2.40244	2.32283	2.48734	2.34984	2.18389
100216540_at	100216540		Snord95	small nucleolar RNA, C/D box 95	GO:0003674: molecular_function, GO:0005575: cellular_component, GO:0008150: biological_process		-1.68028	0.111327	0.178403	0.157473	-1.4857	0.155809	0.522877	0.453458	3.6994	0.00195449	0.212349	0.161072	-1.67656	-3.28758	0.00776581	0.274566	0.191379	1.13382	1.76382	0.106861	0.500085	0.452072	-1.75615	-4.8882	0.000663357	0.00498081	0.00308085	1.08244	0.845588	0.41558	0.587994	0.537652	7.68087	7.36767	8.0212	6.61213	6.61834	7.41533	7.07002	7.08405	6.87704	6.70992	6.91312
16779_at	16779	3913	Lamb2	laminin, beta 2	GO:0000904: cell morphogenesis involved in differentiation, GO:0005178: integrin binding, GO:0005576: extracellular region, GO:0005578: proteinaceous extracellular matrix, GO:0005604: basement membrane, GO:0005604: basement membrane, GO:0005605: basal lamina, GO:0005608: laminin-3 complex, GO:0005608: laminin-3 complex, GO:0007155: cell adhesion, GO:0007411: axon guidance, GO:0007528: neuromuscul…	04510: Focal adhesion, 04512: ECM-receptor interaction, 05145: Toxoplasmosis, 05146: Amoebiasis, 05200: Pathways in cancer, 05222: Small cell lung cancer	2.35038	0.0311899	0.0656073	0.0528344	-2.00762	0.0609799	0.374832	0.305236	3.68791	0.00200242	0.216622	0.16411	-1.51604	-3.81898	0.00314278	0.220082	0.143912	1.0499	0.610856	0.554318	0.817924	0.796274	-1.05512	-0.662669	0.522751	0.626824	0.601403	1.50854	4.16293	0.00154044	0.0144118	0.00890524	6.71488	6.61385	6.83624	6.11612	5.97526	6.41643	5.93843	6.82906	6.65285	6.58428	6.50188
58203_at	58203	81030	Zbp1	Z-DNA binding protein 1	GO:0003677: DNA binding, GO:0003692: left-handed Z-DNA binding, GO:0003723: RNA binding, GO:0003726: double-stranded RNA adenosine deaminase activity, GO:0005634: nucleus, GO:0005737: cytoplasm, GO:0008150: biological_process, GO:0008152: metabolic process, GO:0009615: response to virus, GO:0019048: virus-host interaction, GO:0045087: innate immune response	04623: Cytosolic DNA-sensing pathway	-8.87407	9.22034e-08	2.87634e-06	1.70755e-06	5.53678	3.72664e-05	0.0154516	0.0093916	3.68369	0.00202031	0.217144	0.16452	1.4668	2.83068	0.0171842	0.339076	0.245467	3.6472	7.58898	1.4282e-05	0.013333	0.00845655	-6.43222	-12.263	2.76281e-07	4.19515e-05	2.46889e-05	-2.58686	-6.33401	5.26513e-05	0.00151499	0.000906067	6.49765	5.7602	6.28668	6.82483	6.4675	6.71761	7.00342	3.90297	3.66647	3.21222	3.20547
15932_at	15932	3425	Idua	iduronidase, alpha-L-	GO:0000902: cell morphogenesis, GO:0003824: catalytic activity, GO:0003940: L-iduronidase activity, GO:0004553: hydrolase activity, hydrolyzing O-glycosyl compounds, GO:0005764: lysosome, GO:0005975: carbohydrate metabolic process, GO:0007040: lysosome organization, GO:0008152: metabolic process, GO:0016787: hydrolase activity, GO:0016798: hydrolase activity, acting on glycosyl bonds, GO:0035108:…	00531: Glycosaminoglycan degradation, 01100: Metabolic pathways, 04142: Lysosome	-0.439552	0.665841	0.735009	0.72064	-1.44888	0.165708	0.533031	0.464671	3.67603	0.0020532	0.217144	0.16452	-1.43236	-3.73506	0.0036186	0.230329	0.151206	1.1007	1.02578	0.328103	0.681692	0.648339	-1.31814	-3.34632	0.00756934	0.0284214	0.0196541	1.19608	1.79998	0.0989816	0.234508	0.184452	4.96944	5.20074	5.10845	4.47813	4.60394	4.69271	4.52641	4.88785	4.60359	4.66884	4.61072
100041293_at	100041293		Gm3257	predicted gene 3257			2.29383	0.0349214	0.0716008		0.301277	0.766886	0.917772		3.67557	0.00205519	0.217144		-1.24556	-1.99124	0.073342	0.533765		1.27023	3.24671	0.0082697	0.297355		-1.05974	-0.692372	0.504704	0.610088		1.49295	4.16267	0.00154111	0.0144118		2.15026	1.94673	1.91664	1.84303	1.35872	1.66652	1.84535	1.93305	2.0635	1.71925	1.96133
232337_at	232337	7580	Zfp637	zinc finger protein 637	GO:0003676: nucleic acid binding, GO:0005622: intracellular, GO:0005634: nucleus, GO:0008150: biological_process, GO:0008270: zinc ion binding, GO:0046872: metal ion binding		-1.36574	0.189957	0.272435	0.24921	-2.51504	0.0223417	0.263398	0.200494	3.6695	0.00208169	0.217144	0.16452	-1.5451	-3.90624	0.00271659	0.215119	0.140716	1.00693	0.0604494	0.952936	0.986391	0.98441	-1.41694	-3.89152	0.00309086	0.0149364	0.00981373	1.098	1.05624	0.313232	0.491214	0.436492	5.83382	5.51114	5.94088	5.13443	4.99785	5.08703	5.34051	5.18822	5.28475	5.29817	5.30756
20556_at	20556		Slfn2	schlafen 2	GO:0008285: negative regulation of cell proliferation		-3.32955	0.0040031	0.0132158	0.00921652	4.77837	0.00017833	0.0370884	0.0235653	3.66482	0.00210231	0.217144	0.16452	1.33643	1.52676	0.156614	0.646828	0.545964	3.01366	8.81193	3.63179e-06	0.00832209	0.00489764	-2.57046	-7.77039	1.66219e-05	0.000441385	0.000262508	-1.13989	-0.686973	0.506153	0.666255	0.621907	6.38202	5.88513	6.41296	6.11393	6.30936	7.04744	6.96489	5.14206	4.67277	5.00728	4.65191
64297_at	64297	51704	Gprc5b	G protein-coupled receptor, family C, group 5, member B	GO:0003674: molecular_function, GO:0004871: signal transducer activity, GO:0004930: G-protein coupled receptor activity, GO:0005634: nucleus, GO:0005730: nucleolus, GO:0005794: Golgi apparatus, GO:0005886: plasma membrane, GO:0007165: signal transduction, GO:0007186: G-protein coupled receptor signaling pathway, GO:0008150: biological_process, GO:0016020: membrane, GO:0016021: integral to membran…		4.30844	0.000484131	0.00240833	0.00153158	-1.03988	0.313072	0.668697	0.614518	3.66322	0.00210942	0.217144	0.16452	-1.53588	-3.36301	0.00681933	0.273155	0.188464	1.15777	1.6509	0.128386	0.524287	0.475033	1.15227	1.07901	0.306304	0.420861	0.390655	2.04897	7.67539	8.978e-06	0.000509684	0.000303371	5.64778	6.20032	5.99213	5.03304	5.54698	5.44882	5.30181	6.36195	5.99915	5.80299	6.42205
232334_at	232334	9686	Vgll4	vestigial like 4 (Drosophila)	GO:0003674: molecular_function, GO:0005634: nucleus, GO:0005730: nucleolus, GO:0006351: transcription, DNA-dependent, GO:0006355: regulation of transcription, DNA-dependent, GO:0008150: biological_process		-7.2846	1.33658e-06	2.21643e-05	1.32179e-05	-1.50041	0.151994	0.518426	0.448844	3.65875	0.00212942	0.217304	0.16452	-1.44088	-3.26622	0.00805754	0.277339	0.194985	1.09527	1.19591	0.258102	0.634523	0.595445	-2.31534	-9.94976	1.87821e-06	0.000124258	7.35128e-05	-1.46711	-4.00035	0.00203505	0.0174178	0.0108356	7.41	7.07119	7.43161	6.5541	6.74298	6.85577	6.96191	6.13885	6.11967	6.05593	6.09309
258722_at	258722		Olfr611	olfactory receptor 611	GO:0004871: signal transducer activity, GO:0004930: G-protein coupled receptor activity, GO:0004984: olfactory receptor activity, GO:0007165: signal transduction, GO:0007186: G-protein coupled receptor signaling pathway, GO:0007608: sensory perception of smell, GO:0016021: integral to membrane, GO:0050911: detection of chemical stimulus involved in sensory perception of smell	04740: Olfactory transduction	1.27958	0.218014	0.303908		-0.238545	0.814332	0.935404		3.64342	0.00219939	0.219262		-1.33441	-2.64755	0.0236605	0.375323		1.22015	2.27655	0.044929	0.417349		-1.16132	-1.39294	0.194285	0.299245		1.40201	3.88076	0.00250249	0.0199866		1.37823	1.53693	1.83013	1.04576	1.17559	1.25172	1.22965	1.41307	1.0693	1.57398	1.41129
735252_at	735252		Mir181a-1	microRNA 181a-1	GO:0071222: cellular response to lipopolysaccharide		-0.943254	0.358867	0.451941		-0.992312	0.335068	0.684364		3.64323	0.00220026	0.219262		-1.4892	-3.23042	0.00857193	0.279152		1.17679	1.6762	0.12325	0.517664		-1.48576	-3.74466	0.00392127	0.0177005		1.17952	1.49884	0.161715	0.322253		1.73462	1.39704	1.14936	0.768226	0.920907	1.06504	0.709148	0.835685	0.738147	0.990556	0.926613
218921_at	218921		4930474N05Rik	RIKEN cDNA 4930474N05 gene	GO:0003674: molecular_function, GO:0005575: cellular_component, GO:0008150: biological_process		-3.44902	0.00309384	0.0107995		-2.02507	0.0589874	0.370689		3.64128	0.00220935	0.219262		-2.01824	-3.66857	0.00404841	0.241022		1.07803	0.929524	0.373543	0.711949		-2.47251	-5.40895	0.000313987	0.00294323		-1.13641	-1.05289	0.314699	0.492691		1.48399	2.56149	2.43393	0.999058	1.58945	0.973754	1.23001	1.05071	0.840414	0.935562	0.872637
234564_at	234564		Ces1f	carboxylesterase 1F	GO:0004091: carboxylesterase activity, GO:0008152: metabolic process, GO:0008152: metabolic process, GO:0016787: hydrolase activity		-3.15837	0.00578232	0.0175898		-0.467862	0.645871	0.865166		3.64124	0.0022095	0.219262		-1.47159	-2.59538	0.0259156	0.388714		1.24204	2.73849	0.0200823	0.363278		-1.95231	-4.85436	0.000697338	0.00517278		-1.06814	-0.706754	0.494241	0.656101		2.94252	2.89867	2.18678	2.18704	2.05496	2.36783	1.99149	1.89215	1.67757	1.50337	1.89017
232415_at	232415		Gm156	predicted gene 156	GO:0003823: antigen binding, GO:0008150: biological_process, GO:0016020: membrane		0.23484	0.81716	0.860878		-0.729211	0.475878	0.773919		3.62013	0.00231011	0.226593		-1.27417	-2.42565	0.0348239	0.429152		1.12555	1.96215	0.0768513	0.466774		-1.19837	-2.29228	0.0452243	0.103394		1.19675	2.26993	0.0440358	0.138486		1.77605	1.63233	1.49526	1.27262	1.13041	1.35093	1.39068	1.43174	1.40796	1.28298	1.38502
20530_at	20530	1318	Slc31a2	solute carrier family 31, member 2	GO:0003674: molecular_function, GO:0005375: copper ion transmembrane transporter activity, GO:0005575: cellular_component, GO:0006810: transport, GO:0006811: ion transport, GO:0006825: copper ion transport, GO:0008150: biological_process, GO:0016020: membrane, GO:0016021: integral to membrane, GO:0035434: copper ion transmembrane transport		1.12224	0.277481	0.368386	0.344649	1.21823	0.239904	0.607399	0.546482	3.62009	0.00231034	0.226593	0.173967	-1.28835	-2.16158	0.0549165	0.48934	0.377549	1.79456	3.27339	0.00789601	0.293983	0.238523	-1.30118	-2.36801	0.0397783	0.0940573	0.0743349	1.77687	3.22937	0.00790422	0.0440004	0.02857	6.83369	7.18852	6.76325	6.57079	6.82803	6.48348	6.3797	6.70914	6.33736	6.33887	6.79742
319433_at	319433	647174	Serpine3	serpin peptidase inhibitor, clade E (nexin, plasminogen activator inhibitor type 1), member 3	GO:0004867: serine-type endopeptidase inhibitor activity, GO:0005575: cellular_component, GO:0010951: negative regulation of endopeptidase activity, GO:0030162: regulation of proteolysis		-2.99858	0.00813221	0.0229541		0.449238	0.658979	0.872661		3.61619	0.0023294	0.227518		-1.18819	-1.6502	0.128712	0.615833		1.22366	3.39565	0.00639237	0.267122		-1.50238	-4.96167	0.000595517	0.0046158		-1.03332	-0.380114	0.71101	0.817929		2.07802	2.41271	2.15396	2.02611	1.93788	2.09695	1.81753	1.67934	1.56653	1.61435	1.67628
26897_at	26897		Acot1	acyl-CoA thioesterase 1	GO:0001676: long-chain fatty acid metabolic process, GO:0004091: carboxylesterase activity, GO:0005737: cytoplasm, GO:0005739: mitochondrion, GO:0005829: cytosol, GO:0006629: lipid metabolic process, GO:0006637: acyl-CoA metabolic process, GO:0008152: metabolic process, GO:0016290: palmitoyl-CoA hydrolase activity, GO:0016787: hydrolase activity, GO:0016790: thiolester hydrolase activity, GO:0047…	01040: Biosynthesis of unsaturated fatty acids	0.45641	0.653918	0.725117	0.710586	-0.772687	0.450401	0.75974	0.715383	3.60767	0.00237163	0.227797	0.176124	-2.03798	-3.62891	0.00432966	0.243026	0.160812	1.41091	1.9253	0.081756	0.475395	0.426785	-1.61385	-2.80751	0.0188173	0.0549478	0.0406904	1.7817	2.95165	0.0130113	0.0613471	0.0409351	5.66218	5.62761	5.89421	4.00029	4.04181	5.48749	4.75752	5.48914	4.28914	4.59252	5.43392
14325_at	14325	2512	Ftl1	ferritin light chain 1	GO:0005506: iron ion binding, GO:0005737: cytoplasm, GO:0008043: intracellular ferritin complex, GO:0042802: identical protein binding		-0.394802	0.697937	0.762359		-0.310791	0.759767	0.914988		3.60121	0.00240418	0.227797		-1.57861	-4.54439	0.000963576	0.1767		1.43222	1.84053	0.0941636	0.488658		-1.58825	-4.80266	0.000752877	0.00546259		1.42353	1.80993	0.0973471	0.231856		1.3701	1.70845	1.47374	0.83319	0.863145	0.784753	0.975294	1.12482	0.726225	0.812145	0.726253
259034_at	259034	144125	Olfr705	olfactory receptor 705	GO:0004984: olfactory receptor activity, GO:0007186: G-protein coupled receptor signaling pathway, GO:0007608: sensory perception of smell, GO:0016021: integral to membrane, GO:0050911: detection of chemical stimulus involved in sensory perception of smell	04740: Olfactory transduction	-1.55053	0.139573	0.21341		-0.743404	0.467467	0.768668		3.59973	0.00241172	0.227797		-1.34646	-2.51275	0.0299297	0.406224		1.14868	2.25933	0.0462852	0.420233		-1.4364	-3.60226	0.00495102	0.0210113		1.07676	0.950175	0.362188	0.540071		2.21687	2.35602	1.83275	1.66224	1.82778	1.54881	1.83183	1.74191	1.67237	1.5362	1.5566
12167_at	12167	658	Bmpr1b	bone morphogenetic protein receptor, type 1B	GO:0000166: nucleotide binding, GO:0001501: skeletal system development, GO:0001502: cartilage condensation, GO:0001550: ovarian cumulus expansion, GO:0001654: eye development, GO:0004672: protein kinase activity, GO:0004674: protein serine/threonine kinase activity, GO:0004675: transmembrane receptor protein serine/threonine kinase activity, GO:0005024: transforming growth factor beta-activated …	04060: Cytokine-cytokine receptor interaction, 04350: TGF-beta signaling pathway	-1.29635	0.212311	0.297471	0.273886	-2.69354	0.0154563	0.232594	0.172559	3.59701	0.00242558	0.227797	0.176124	-2.35557	-5.75224	0.000158217	0.0984397	0.0593122	1.01647	-0.147283	0.885705	0.963216	0.959669	-1.9303	-6.07776	0.000127067	0.00159346	0.000962671	1.24041	1.06837	0.307963	0.485643	0.430974	3.91601	3.64594	3.53233	2.41387	2.88882	1.89717	2.51566	2.61469	3.1001	2.69031	2.56344
56437_at	56437	6236	Rrad	Ras-related associated with diabetes	GO:0000166: nucleotide binding, GO:0005525: GTP binding, GO:0030308: negative regulation of cell growth		-0.823816	0.421541	0.514051	0.49245	-1.89182	0.0758121	0.406539	0.33644	3.5964	0.00242869	0.227797	0.176124	-1.72946	-4.01078	0.00228414	0.200606	0.131329	1.0981	0.731477	0.480532	0.77584	0.750767	-1.55741	-4.83695	0.000715531	0.00526857	0.00325988	1.21941	1.43978	0.177441	0.342312	0.286999	5.10234	5.11062	4.68529	3.72621	4.23408	4.49535	4.19762	4.32464	4.30361	4.38677	4.3442
100039055_at	100039055		Gm16404	predicted gene 16404			-1.42333	0.172876	0.253358		-0.536042	0.598928	0.841578		3.59445	0.0024387	0.227797		-1.74155	-3.2897	0.00773742	0.274566		1.35421	2.08383	0.062542	0.446367		-1.95531	-3.79042	0.00364001	0.0167887		1.20617	1.296	0.221189	0.394263		1.74736	2.40899	1.35211	1.15038	0.956125	1.08772	1.2053	1.16917	0.512757	0.857516	1.11392
22762_at	22762	23414	Zfpm2	zinc finger protein, multitype 2	GO:0000122: negative regulation of transcription from RNA polymerase II promoter, GO:0001071: nucleic acid binding transcription factor activity, GO:0001570: vasculogenesis, GO:0001570: vasculogenesis, GO:0001701: in utero embryonic development, GO:0003148: outflow tract septum morphogenesis, GO:0003151: outflow tract morphogenesis, GO:0003181: atrioventricular valve morphogenesis, GO:0003192: mi…		-6.01253	1.44635e-05	0.000139629	8.41387e-05	-0.547172	0.591428	0.838262	0.801355	3.59332	0.00244454	0.227797	0.176124	-1.37184	-2.76188	0.0193783	0.351111	0.255672	1.19285	2.15342	0.0555313	0.435542	0.384582	-2.29732	-8.4209	8.2824e-06	0.000286373	0.000169464	-1.40389	-3.17641	0.00869045	0.0469006	0.0305701	5.0922	4.9728	4.9725	4.2608	4.37647	4.88148	4.6307	4.13147	3.76577	3.75343	3.53981
22157_at	22157	7287	Tulp1	tubby like protein 1	GO:0001750: photoreceptor outer segment, GO:0001917: photoreceptor inner segment, GO:0005515: protein binding, GO:0005546: phosphatidylinositol-4,5-bisphosphate binding, GO:0005576: extracellular region, GO:0005737: cytoplasm, GO:0005886: plasma membrane, GO:0006909: phagocytosis, GO:0007601: visual perception, GO:0007602: phototransduction, GO:0008020: G-protein coupled photoreceptor activity, G…		-3.14648	0.00593142	0.0179502	0.0128128	-0.399154	0.694788	0.888344	0.859707	3.59307	0.00244584	0.227797	0.176124	-1.27324	-2.35293	0.0395027	0.445383	0.335283	1.16815	2.30429	0.0428249	0.41564	0.359506	-1.56383	-5.65505	0.000223469	0.00232566	0.00141242	-1.05143	-0.498958	0.627518	0.75929	0.72403	4.58364	4.65487	4.75097	4.12935	4.19517	4.3524	4.55103	4.13128	4.09752	3.85912	3.97507
258275_at	258275	79317	Olfr729	olfactory receptor 729	GO:0004871: signal transducer activity, GO:0004930: G-protein coupled receptor activity, GO:0004984: olfactory receptor activity, GO:0007165: signal transduction, GO:0007186: G-protein coupled receptor signaling pathway, GO:0007608: sensory perception of smell, GO:0016021: integral to membrane, GO:0050911: detection of chemical stimulus involved in sensory perception of smell	04740: Olfactory transduction	-0.668232	0.513027	0.600622		-0.699937	0.493509	0.7851		3.59118	0.00245561	0.227797		-1.5799	-2.90272	0.0151536	0.329554		1.26136	2.28016	0.0446498	0.417349		-1.58782	-3.39479	0.00698114	0.0268518		1.25507	1.87685	0.086969	0.215706		1.81314	1.08342	1.87094	0.917196	0.687353	0.942137	1.27543	1.10494	0.873902	0.962192	0.903013
214804_at	214804	84144	Syde2	synapse defective 1, Rho GTPase, homolog 2 (C. elegans)	GO:0003674: molecular_function, GO:0005575: cellular_component, GO:0008150: biological_process		2.19008	0.0428675	0.0841197	0.0691642	0.273314	0.78793	0.926722	0.908524	3.59013	0.00246105	0.227797	0.176363	-1.20825	-1.87058	0.0897529	0.561023	0.45198	1.21966	2.90665	0.0149603	0.341338	0.286048	-1.05776	-0.678419	0.513133	0.617848	0.592083	1.39318	3.8858	0.00248073	0.0198831	0.0124535	5.01233	4.8686	5.1583	4.76498	4.56192	4.79185	4.84563	4.98386	5.02202	4.8798	4.85524
18034_at	18034	4791	Nfkb2	nuclear factor of kappa light polypeptide gene enhancer in B cells 2, p49/p100	GO:0002268: follicular dendritic cell differentiation, GO:0002467: germinal center formation, GO:0003677: DNA binding, GO:0003700: sequence-specific DNA binding transcription factor activity, GO:0005634: nucleus, GO:0005634: nucleus, GO:0005737: cytoplasm, GO:0005829: cytosol, GO:0006351: transcription, DNA-dependent, GO:0006355: regulation of transcription, DNA-dependent, GO:0007165: signal tran…	04010: MAPK signaling pathway, 04380: Osteoclast differentiation, 05200: Pathways in cancer	-0.820867	0.423172	0.515563	0.494006	0.846123	0.409328	0.735638	0.68802	3.58609	0.00248209	0.227797	0.177007	-1.29613	-1.72389	0.114248	0.594956	0.489378	1.5483	4.05525	0.00209622	0.175539	0.126838	-1.62976	-4.23386	0.00179396	0.0101478	0.00649697	1.23134	1.54718	0.149751	0.306829	0.251945	5.98843	5.69458	6.35292	5.38566	5.36451	6.12408	5.64146	5.32009	5.35792	5.1392	5.4912
74314_at	74314		1700120G07Rik	RIKEN cDNA 1700120G07 gene			-1.01477	0.324552	0.417083		0.262483	0.796128	0.928546		3.57986	0.00251493	0.227797		-1.26864	-1.88068	0.0882596	0.557762		1.28063	3.76824	0.00338551	0.21053		-1.43452	-3.69911	0.00422389	0.0187179		1.13254	1.3642	0.199437	0.36909		2.73132	2.83291	2.37253	2.29125	1.9381	2.44338	2.52213	2.18095	2.00235	2.0735	2.28029
22364_at	22364	29802	Vpreb3	pre-B lymphocyte gene 3			-2.30919	0.0338686	0.0699174		0.387089	0.703531	0.891827		3.57678	0.00253132	0.227797		-1.26274	-2.2428	0.0477725	0.467126		1.32571	2.74573	0.0198294	0.363139		-1.62842	-6.01704	0.000137596	0.00168035		1.02801	0.183645	0.857593	0.913939		2.67903	2.80869	2.8343	2.14262	2.55847	2.44475	2.57055	1.9807	2.1201	1.92967	2.23767
57247_at	57247	92822	Zfp276	zinc finger protein (C2H2 type) 276	GO:0003676: nucleic acid binding, GO:0003677: DNA binding, GO:0005622: intracellular, GO:0005634: nucleus, GO:0006351: transcription, DNA-dependent, GO:0006355: regulation of transcription, DNA-dependent, GO:0008270: zinc ion binding, GO:0046872: metal ion binding		-2.04831	0.0564241	0.104364	0.0876711	-1.65153	0.117124	0.471858	0.402522	3.57631	0.00253382	0.227797	0.177007	-1.35258	-3.11733	0.0104283	0.296008	0.210181	1.05678	0.874258	0.401578	0.730316	0.698769	-1.38575	-3.92616	0.00292328	0.0143746	0.00941672	1.03149	0.410297	0.689371	0.803639	0.773417	4.72672	4.68836	4.95322	4.30023	4.30329	4.42306	4.40318	4.40931	4.19551	4.42488	4.25109
67769_at	67769	55105	Gpatch2	G patch domain containing 2	GO:0003674: molecular_function, GO:0003676: nucleic acid binding, GO:0005575: cellular_component, GO:0010923: negative regulation of phosphatase activity		-1.92365	0.0714436	0.125431	0.107451	-1.19859	0.247258	0.614515	0.554387	3.57458	0.00254312	0.227797	0.177007	-1.43919	-3.06657	0.0113902	0.306061	0.217495	1.12847	1.55691	0.149168	0.542457	0.494745	-1.55037	-5.07189	0.000507266	0.00412856	0.00253445	1.04755	0.512395	0.618384	0.752776	0.716366	5.45394	5.52104	5.76074	5.22841	5.29828	4.87874	4.76146	4.77193	5.04616	5.03338	4.94051
67483_at	67483	138255	1700028P14Rik	RIKEN cDNA 1700028P14 gene	GO:0003674: molecular_function, GO:0005575: cellular_component, GO:0008150: biological_process, GO:0016020: membrane, GO:0016021: integral to membrane		-5.6624	2.89438e-05	0.000242781	0.000147089	-2.20686	0.0414783	0.329718	0.260637	3.57166	0.00255884	0.227797	0.177007	-2.14032	-3.95951	0.00248647	0.208906	0.137059	1.06243	0.513575	0.618208	0.849093	0.832395	-4.06607	-14.8368	4.62518e-08	1.6896e-05	9.94347e-06	-1.78812	-2.57785	0.0254662	0.0957917	0.0670509	4.13051	3.88384	4.1586	2.33363	2.30893	3.72232	3.0069	2.23594	1.77657	2.03236	2.07486
17067_at	17067		Ly6c1	lymphocyte antigen 6 complex, locus C1	GO:0005886: plasma membrane, GO:0009897: external side of plasma membrane, GO:0016020: membrane, GO:0031225: anchored to membrane		5.14404	8.31567e-05	0.000578859		-0.936956	0.362005	0.704936		3.5707	0.00256398	0.227797		-1.66153	-3.43869	0.00598834	0.262965		1.20243	1.69436	0.119679	0.514501		1.31955	1.7633	0.108795	0.195575		2.6363	9.39047	1.25616e-06	0.000163886		2.14784	1.36922	1.80462	0.838918	1.0756	1.39163	0.935513	2.4836	2.38042	1.65376	2.18332
11303_at	11303	19	Abca1	ATP-binding cassette, sub-family A (ABC1), member 1	GO:0000166: nucleotide binding, GO:0002790: peptide secretion, GO:0005515: protein binding, GO:0005524: ATP binding, GO:0005548: phospholipid transporter activity, GO:0005548: phospholipid transporter activity, GO:0005548: phospholipid transporter activity, GO:0005622: intracellular, GO:0005794: Golgi apparatus, GO:0005886: plasma membrane, GO:0005887: integral to plasma membrane, GO:0005887: int…	02010: ABC transporters, 04975: Fat digestion and absorption	-2.50386	0.022858	0.051374	0.0404134	-1.23003	0.235566	0.603422	0.542607	3.57045	0.00256536	0.227797	0.177007	-2.23516	-3.66725	0.00405747	0.241022	0.159206	1.26263	1.60411	0.138387	0.532467	0.483361	-3.07102	-6.5261	7.16597e-05	0.00108715	0.000653159	-1.08817	0.0281295	0.978057	0.986826	0.984094	8.3833	8.17047	8.34405	5.91991	6.81407	7.68908	7.53491	7.4245	6.41781	6.14411	6.37726
94249_at	94249	57419	Slc24a3	solute carrier family 24 (sodium/potassium/calcium exchanger), member 3	GO:0005886: plasma membrane, GO:0006810: transport, GO:0006811: ion transport, GO:0006812: cation transport, GO:0006813: potassium ion transport, GO:0006814: sodium ion transport, GO:0006816: calcium ion transport, GO:0006874: cellular calcium ion homeostasis, GO:0008273: calcium, potassium:sodium antiporter activity, GO:0008273: calcium, potassium:sodium antiporter activity, GO:0008273: calcium,…		-5.60083	3.27527e-05	0.000268826	0.000163038	-3.91787	0.0011225	0.0924635	0.0612177	3.56764	0.00258059	0.227797	0.177007	-3.60339	-5.41082	0.000258176	0.110298	0.0660307	-1.30955	-2.15346	0.0555282	0.435542	0.384582	-5.62242	-14.0312	7.83443e-08	2.07868e-05	1.22333e-05	-2.04331	-2.6019	0.0243922	0.0929308	0.0648681	9.07608	8.59876	9.07809	6.34269	6.11629	7.82572	7.37286	6.23191	6.48071	6.19928	6.78341
72061_at	72061	84909	2010111I01Rik	RIKEN cDNA 2010111I01 gene	GO:0004177: aminopeptidase activity, GO:0005737: cytoplasm, GO:0006508: proteolysis, GO:0008233: peptidase activity, GO:0008237: metallopeptidase activity, GO:0008270: zinc ion binding, GO:0016787: hydrolase activity, GO:0019370: leukotriene biosynthetic process, GO:0046872: metal ion binding		-2.99272	0.00823417	0.02319	0.016906	-2.36185	0.03048	0.294811	0.228729	3.56691	0.00258458	0.227797	0.177007	-1.67518	-3.82743	0.0030986	0.220082	0.143912	1.01144	0.232564	0.820581	0.937116	0.931721	-1.81951	-6.40269	8.36799e-05	0.0012081	0.000726427	-1.07387	-0.398957	0.697468	0.808532	0.779143	5.74535	5.43567	5.69554	4.68083	4.57656	4.77533	5.37501	4.99971	4.70749	4.75174	4.58141
67417_at	67417	124454	Ears2	glutamyl-tRNA synthetase 2 (mitochondrial)(putative)	GO:0000166: nucleotide binding, GO:0003723: RNA binding, GO:0004812: aminoacyl-tRNA ligase activity, GO:0004818: glutamate-tRNA ligase activity, GO:0005524: ATP binding, GO:0005634: nucleus, GO:0005737: cytoplasm, GO:0005739: mitochondrion, GO:0005739: mitochondrion, GO:0006412: translation, GO:0006418: tRNA aminoacylation for protein translation, GO:0006424: glutamyl-tRNA aminoacylation, GO:0016…	00860: Porphyrin and chlorophyll metabolism, 00970: Aminoacyl-tRNA biosynthesis, 01100: Metabolic pathways	-0.49841	0.624632	0.69963	0.684024	-1.30487	0.209461	0.578269	0.514171	3.56249	0.00260879	0.227797	0.177007	-1.31379	-2.73971	0.0201434	0.35333	0.25715	1.08075	1.29227	0.224045	0.608527	0.566836	-1.24902	-2.74451	0.02095	0.0593332	0.0443453	1.13679	1.66716	0.123327	0.26996	0.217196	5.56637	5.28497	5.26568	4.99939	4.92569	4.94354	5.06824	5.02652	5.08629	5.09284	5.02586
232680_at	232680	1358	Cpa2	carboxypeptidase A2, pancreatic	GO:0004180: carboxypeptidase activity, GO:0004181: metallocarboxypeptidase activity, GO:0005576: extracellular region, GO:0006508: proteolysis, GO:0008152: metabolic process, GO:0008233: peptidase activity, GO:0008237: metallopeptidase activity, GO:0008270: zinc ion binding, GO:0016787: hydrolase activity, GO:0046872: metal ion binding	04972: Pancreatic secretion, 04974: Protein digestion and absorption	-0.898306	0.381667	0.475124		1.33026	0.201142	0.56908		3.56142	0.0026147	0.227797		-1.12168	-1.15675	0.27323	0.749769		1.33496	4.03174	0.00217935	0.178353		-1.3309	-3.74902	0.00389355	0.0176132		1.1251	1.30336	0.218753	0.391723		1.63923	1.52769	1.6055	1.22045	1.52198	1.29305	1.62985	1.04863	1.12151	1.31063	1.22218
27416_at	27416	10057	Abcc5	ATP-binding cassette, sub-family C (CFTR/MRP), member 5	GO:0000166: nucleotide binding, GO:0005524: ATP binding, GO:0006810: transport, GO:0016020: membrane, GO:0016021: integral to membrane, GO:0016887: ATPase activity, GO:0017111: nucleoside-triphosphatase activity, GO:0042626: ATPase activity, coupled to transmembrane movement of substances, GO:0048471: perinuclear region of cytoplasm, GO:0055085: transmembrane transport	02010: ABC transporters	1.74155	0.0997926	0.163601	0.143234	-1.79345	0.0908503	0.432046	0.363107	3.56041	0.00262026	0.227797	0.177007	-1.81328	-3.62538	0.00435569	0.243026	0.160812	1.08726	1.0255	0.328225	0.681753	0.64836	-1.17391	-1.21193	0.253819	0.365712	0.334978	1.67944	4.11195	0.00168043	0.0152528	0.00945656	6.13872	5.874	6.51658	4.93698	4.93393	5.81115	5.48896	6.20666	5.62477	5.84793	6.12584
277773_at	277773		BC049635	cDNA sequence BC049635	GO:0003674: molecular_function, GO:0005575: cellular_component, GO:0008150: biological_process, GO:0016020: membrane, GO:0016021: integral to membrane		-1.89509	0.0753523	0.130871		-1.2136	0.241621	0.609091		3.5587	0.00262976	0.227797		-1.42922	-3.16195	0.00965132	0.283203		1.11991	1.43037	0.181757	0.573634		-1.52792	-4.90724	0.000645017	0.00488971		1.04757	0.534628	0.603417	0.741848		2.24106	2.28047	2.1459	1.78381	1.39086	1.58522	2.00189	1.56367	1.56957	1.42451	1.85545
14972_at	14972	3105	H2-K1	histocompatibility 2, K1, K region	GO:0001916: positive regulation of T cell mediated cytotoxicity, GO:0002474: antigen processing and presentation of peptide antigen via MHC class I, GO:0002485: antigen processing and presentation of endogenous peptide antigen via MHC class I via ER pathway, TAP-dependent, GO:0006955: immune response, GO:0009897: external side of plasma membrane, GO:0016020: membrane, GO:0016021: integral to memb…	04144: Endocytosis, 04145: Phagosome, 04514: Cell adhesion molecules (CAMs), 04612: Antigen processing and presentation, 04650: Natural killer cell mediated cytotoxicity, 04940: Type I diabetes mellitus, 05320: Autoimmune thyroid disease, 05330: Allograft rejection, 05332: Graft-versus-host disease, 05416: Viral myocarditis	-3.50771	0.00272546	0.00974855	0.00664413	3.48887	0.00283866	0.136237	0.0934808	3.55632	0.00264297	0.227797	0.177007	1.04067	0.421197	0.682176	0.933723	0.901456	1.57195	5.64886	0.00017903	0.0446794	0.0282524	-1.62571	-5.29019	0.000371115	0.00330308	0.00201579	-1.07626	-0.894137	0.390163	0.565379	0.513729	6.75132	6.52575	6.78231	6.85664	6.64302	6.69124	6.79303	6.0436	6.15458	6.00189	5.72568
68108_at	68108		9430008C03Rik	RIKEN cDNA 9430008C03 gene	GO:0003674: molecular_function, GO:0005575: cellular_component, GO:0008150: biological_process		0.594422	0.560119	0.642211	0.625146	-2.67042	0.0162174	0.237101	0.176321	3.55501	0.00265027	0.227797	0.177007	-1.57552	-4.07274	0.00206238	0.194698	0.128006	-1.01436	-0.158904	0.876766	0.960041	0.955774	-1.21232	-1.86246	0.0926039	0.173829	0.147344	1.28119	3.02904	0.0113215	0.056163	0.0371293	5.99687	5.60767	6.07094	5.2147	5.21876	5.15232	5.4014	5.53865	5.72866	5.77015	5.45005
19283_at	19283	5803	Ptprz1	protein tyrosine phosphatase, receptor type Z, polypeptide 1	GO:0004721: phosphoprotein phosphatase activity, GO:0005515: protein binding, GO:0005578: proteinaceous extracellular matrix, GO:0007409: axonogenesis, GO:0008152: metabolic process, GO:0016311: dephosphorylation, GO:0016787: hydrolase activity, GO:0072534: perineuronal net		3.33568	0.00395057	0.0130839	0.00911572	-2.80027	0.0123656	0.217356	0.159506	3.55254	0.00266416	0.227797	0.177007	-2.6022	-4.79602	0.000650116	0.162341	0.10133	-1.03866	-0.352008	0.731811	0.901829	0.89207	1.07345	0.538072	0.602476	0.695585	0.673484	2.68937	5.11457	0.000323421	0.00494669	0.0029929	4.22339	4.22978	3.71697	2.26909	2.2104	3.53865	2.27904	4.38387	4.03356	4.40383	3.80621
194401_at	194401	57553	Mical3	microtubule associated monoxygenase, calponin and LIM domain containing 3	GO:0003674: molecular_function, GO:0003779: actin binding, GO:0004497: monooxygenase activity, GO:0005575: cellular_component, GO:0005737: cytoplasm, GO:0005856: cytoskeleton, GO:0006887: exocytosis, GO:0008150: biological_process, GO:0008152: metabolic process, GO:0008270: zinc ion binding, GO:0016491: oxidoreductase activity, GO:0046872: metal ion binding, GO:0055114: oxidation-reduction process		-6.39578	6.89619e-06	7.81588e-05	4.7012e-05	-2.32004	0.0331432	0.302684	0.236255	3.5509	0.00267335	0.227797	0.177007	-1.63821	-4.29229	0.00144187	0.182325	0.119222	1.0242	0.205726	0.840949	0.945406	0.939274	-2.39918	-8.89624	5.10929e-06	0.00021791	0.000128896	-1.4299	-3.47381	0.00511297	0.0327849	0.0209867	8.66405	8.33139	8.76529	7.7599	7.69618	7.99678	8.06009	7.2819	7.31555	7.54588	7.17471
245566_at	245566		Cypt2	cysteine-rich perinuclear theca 2	GO:0003674: molecular_function, GO:0005575: cellular_component, GO:0008150: biological_process		-2.37916	0.0294374	0.0627112		-0.834008	0.415932	0.740029		3.54292	0.00271873	0.227797		-1.4569	-2.8746	0.0159157	0.335606		1.18081	1.93839	0.0799807	0.472909		-1.69371	-4.61603	0.000995982	0.00669349		1.01572	0.137986	0.892715	0.935511		2.13157	2.17846	2.72788	1.95549	1.6309	1.73474	1.96799	1.41391	1.68786	1.65398	1.67581
13214_at	13214		Defb1	defensin beta 1	GO:0005576: extracellular region, GO:0006952: defense response, GO:0009617: response to bacterium, GO:0009617: response to bacterium, GO:0042742: defense response to bacterium, GO:0045087: innate immune response		1.17101	0.257875	0.347371	0.323494	2.83541	0.0114853	0.212086	0.154603	3.54268	0.00272011	0.227797	0.177007	1.00395	-0.160613	0.875472	0.979789	0.969252	4.11077	4.55416	0.000934019	0.115188	0.0766797	-1.51302	-4.93075	0.000623117	0.00477831	0.00294655	2.70623	2.95914	0.0128372	0.0608223	0.0405682	2.11402	1.80816	2.09636	1.47449	1.99515	2.51802	1.89274	1.51816	1.45434	1.36079	1.31991
67169_at	67169		Nradd	neurotrophin receptor associated death domain	GO:0005166: neurotrophin p75 receptor binding, GO:0005634: nucleus, GO:0005641: nuclear envelope lumen, GO:0005886: plasma membrane, GO:0006915: apoptotic process, GO:0007165: signal transduction, GO:0010942: positive regulation of cell death, GO:0016020: membrane, GO:0016021: integral to membrane, GO:0030027: lamellipodium, GO:0032589: neuron projection membrane, GO:0044298: cell body membrane		6.02416	1.4138e-05	0.000137326	8.27634e-05	-3.83544	0.00134146	0.100038	0.0662843	3.54267	0.00272016	0.227797	0.177007	-1.80493	-5.88273	0.00013178	0.0976953	0.0592089	-1.1145	-1.19956	0.256741	0.63371	0.594505	1.31725	3.3379	0.00767669	0.0286835	0.0198598	2.1333	6.98124	2.18058e-05	0.000873825	0.00052088	5.5485	5.5278	5.52125	4.69743	4.44032	4.86433	4.68911	5.80834	5.77538	6.04048	6.07166
72242_at	72242		Psg21	pregnancy-specific glycoprotein 21	GO:0003674: molecular_function, GO:0005575: cellular_component, GO:0007565: female pregnancy, GO:0008150: biological_process		-2.57474	0.0197657	0.0458506		-1.42377	0.172749	0.540104		3.54064	0.00273183	0.227797		-1.36893	-2.96388	0.0136203	0.31825		1.08003	1.17841	0.264709	0.640517		-1.4836	-4.33799	0.00152511	0.00897335		-1.00347	-0.052235	0.959267	0.975718		1.29913	1.73662	1.56223	1.08145	1.16995	1.09549	1.01149	0.985268	0.851939	1.06442	0.988867
245368_at	245368	163081	Zfp300	zinc finger protein 300	GO:0003674: molecular_function, GO:0005575: cellular_component, GO:0008150: biological_process, GO:0046872: metal ion binding		2.90262	0.009967	0.0268836		-1.67852	0.111674	0.466383		3.54032	0.00273372	0.227797		-1.53542	-3.52688	0.00515014	0.25554		1.07395	0.927209	0.374689	0.71269		-1.00698	-0.0295989	0.976978	0.983887		1.63753	5.48726	0.00018164	0.0033517		2.66484	3.14816	3.11776	2.53021	2.15035	2.50344	2.28005	3.03682	2.68278	2.99064	3.17837
226245_at	226245	79949	9930023K05Rik	RIKEN cDNA 9930023K05 gene	GO:0003674: molecular_function, GO:0005543: phospholipid binding, GO:0005575: cellular_component, GO:0008150: biological_process		5.20586	7.31984e-05	0.000522908	0.000319413	1.07123	0.299154	0.659882	0.604872	3.53797	0.00274728	0.227797	0.177007	-1.26263	-1.77147	0.105705	0.583424	0.476499	1.62405	3.5343	0.0050381	0.244701	0.192746	1.34087	2.70894	0.0222597	0.0619629	0.0464792	2.74954	6.75259	2.95891e-05	0.00106762	0.000636489	8.01742	7.86186	8.31521	7.29829	7.82564	7.69134	8.04806	8.64398	8.42857	8.20266	8.67732
100313519_at	100313519		Snord17	small nucleolar RNA, C/D box 17	GO:0003674: molecular_function, GO:0005575: cellular_component, GO:0008150: biological_process		-5.13875	8.40709e-05	0.000583833	0.000357477	0.534139	0.600215	0.841858	0.806189	3.53709	0.0027524	0.227797	0.177007	-1.27951	-1.98012	0.0747288	0.534138	0.423611	1.373	3.20003	0.0089677	0.307119	0.250521	-2.29148	-7.98295	1.31758e-05	0.000385276	0.000228328	-1.30437	-2.36859	0.0369846	0.123392	0.0888093	11.3867	10.9074	11.0365	10.4148	10.8711	10.9105	10.8279	9.86655	10.1721	9.8726	9.77003
100504249_at	100504249		Gm15350	predicted gene 15350			-1.5481	0.140156	0.214185	0.191973	-1.30671	0.208848	0.577474	0.513889	3.5364	0.00275642	0.227797	0.177007	-1.65282	-3.41754	0.00620954	0.266121	0.179817	1.15625	1.41183	0.18701	0.57839	0.534915	-1.71032	-4.19111	0.00191844	0.0106629	0.0068442	1.11738	0.955076	0.359811	0.537637	0.484033	4.84213	4.32955	5.03353	4.07754	3.64174	4.29769	4.06588	4.08615	3.68701	4.01357	4.13364
12269_at	12269		C4bp	complement component 4 binding protein	GO:0005515: protein binding, GO:0005576: extracellular region, GO:0005737: cytoplasm, GO:0006958: complement activation, classical pathway, GO:0045087: innate immune response	04610: Complement and coagulation cascades	-9.19291	5.59978e-08	1.94956e-06	1.15692e-06	-3.48809	0.00284345	0.136237	0.0934808	3.53417	0.00276941	0.228123	0.177075	-1.97813	-5.07414	0.000425255	0.143525	0.0888484	-1.11434	-1.1273	0.284778	0.656761	0.618686	-3.73229	-13.0529	1.54382e-07	2.9705e-05	1.74817e-05	-2.1025	-5.8657	0.000103161	0.00234681	0.00140651	4.80292	5.13134	4.93566	3.75574	4.37838	4.06286	3.59095	3.01123	3.30373	3.11075	2.77634
246728_at	246728	4939	Oas2	2'-5' oligoadenylate synthetase 2	GO:0001730: 2'-5'-oligoadenylate synthetase activity, GO:0001730: 2'-5'-oligoadenylate synthetase activity, GO:0003725: double-stranded RNA binding, GO:0003725: double-stranded RNA binding, GO:0005524: ATP binding, GO:0005737: cytoplasm, GO:0006164: purine nucleotide biosynthetic process, GO:0006401: RNA catabolic process, GO:0006486: protein glycosylation, GO:0008270: zinc ion binding, GO:000961…	05160: Hepatitis C	-10.6383	6.72924e-09	4.26174e-07	2.52075e-07	3.58228	0.00231966	0.124403	0.0851727	3.53004	0.00279361	0.229367	0.177387	1.10915	0.693982	0.502885	0.867627	0.820209	2.7338	5.75923	0.000152998	0.0419182	0.0267009	-9.61878	-11.8494	3.79797e-07	5.0385e-05	2.9809e-05	-3.9025	-9.44078	1.19088e-06	0.000162493	9.56288e-05	8.14007	7.39161	7.986	8.34844	7.74438	7.70333	8.18816	4.69377	5.06686	4.59027	3.81124
50773_at	50773	30833	Nt5c	5',3'-nucleotidase, cytosolic	GO:0000166: nucleotide binding, GO:0005634: nucleus, GO:0005737: cytoplasm, GO:0005739: mitochondrion, GO:0008252: nucleotidase activity, GO:0008253: 5'-nucleotidase activity, GO:0009117: nucleotide metabolic process, GO:0009223: pyrimidine deoxyribonucleotide catabolic process, GO:0009264: deoxyribonucleotide catabolic process, GO:0016311: dephosphorylation, GO:0016787: hydrolase activity, GO:00…	00230: Purine metabolism, 00240: Pyrimidine metabolism, 00760: Nicotinate and nicotinamide metabolism, 01100: Metabolic pathways	2.01202	0.0604713	0.11003	0.0930144	-1.38818	0.183145	0.551468	0.484418	3.52601	0.00281747	0.229466	0.177387	-1.30884	-2.85799	0.016384	0.336613	0.243556	1.07242	1.09717	0.29715	0.66365	0.627163	-1.05866	-0.768796	0.460057	0.570145	0.542529	1.32585	3.53446	0.00459219	0.0303728	0.019402	7.82522	7.84067	7.69438	7.28296	7.34781	7.4742	7.48479	7.80162	7.6035	7.68104	7.73059
223752_at	223752	23151	Gramd4	GRAM domain containing 4	GO:0003674: molecular_function, GO:0005575: cellular_component, GO:0005739: mitochondrion, GO:0006915: apoptotic process, GO:0008150: biological_process, GO:0016020: membrane, GO:0016021: integral to membrane		-2.59011	0.0191497	0.0447761	0.0346888	0.140951	0.889578	0.963003	0.952868	3.52565	0.00281962	0.229466	0.177387	-1.41146	-2.54525	0.0282824	0.400627	0.29359	1.38972	2.60923	0.0251813	0.378564	0.321493	-1.93358	-5.36648	0.00033325	0.00305896	0.00186474	1.01445	-0.0720346	0.943852	0.967103	0.960607	6.0874	5.72672	6.48054	5.50876	5.69514	5.60798	5.71428	4.98722	5.1949	5.2122	5.30614
69171_at	69171	27013	1810031K17Rik	RIKEN cDNA 1810031K17 gene	GO:0000079: regulation of cyclin-dependent protein kinase activity, GO:0003674: molecular_function, GO:0005575: cellular_component, GO:0008150: biological_process, GO:0016020: membrane, GO:0016021: integral to membrane, GO:0019901: protein kinase binding		-6.11021	1.19529e-05	0.000119986	7.2224e-05	0.37633	0.711364	0.89505	0.869327	3.52523	0.00282212	0.229466	0.177387	-1.21498	-1.86872	0.0900317	0.561247	0.452109	1.24783	2.95053	0.013855	0.33543	0.280455	-2.00088	-8.11348	1.14502e-05	0.000355436	0.000210474	-1.31976	-3.0516	0.0108718	0.0546537	0.0360948	6.53537	6.72446	6.82517	6.25108	6.48325	6.31548	6.59992	5.88936	5.598	5.65843	5.63282
243548_at	243548	166336	Prickle2	prickle homolog 2 (Drosophila)	GO:0005515: protein binding, GO:0005634: nucleus, GO:0005737: cytoplasm, GO:0008270: zinc ion binding, GO:0016020: membrane, GO:0016327: apicolateral plasma membrane, GO:0016328: lateral plasma membrane, GO:0031175: neuron projection development, GO:0045197: establishment or maintenance of epithelial cell apical/basal polarity, GO:0046872: metal ion binding	04310: Wnt signaling pathway	8.41291	1.93796e-07	5.03072e-06	2.98523e-06	-1.87212	0.0786341	0.410118	0.340125	3.52317	0.00283441	0.229724	0.177408	-1.69034	-3.7483	0.00353877	0.22965	0.150639	1.06851	0.753404	0.467804	0.769321	0.743037	1.78441	4.82275	0.000730756	0.00534517	0.00330994	3.2229	11.0114	2.50222e-07	7.02461e-05	4.13406e-05	5.10034	4.88371	5.54891	4.0649	4.55997	4.60969	4.4941	5.85363	6.00523	6.33123	5.92282
12562_at	12562	1003	Cdh5	cadherin 5	GO:0001955: blood vessel maturation, GO:0005102: receptor binding, GO:0005509: calcium ion binding, GO:0005515: protein binding, GO:0005886: plasma membrane, GO:0005911: cell-cell junction, GO:0005911: cell-cell junction, GO:0005923: tight junction, GO:0007155: cell adhesion, GO:0007156: homophilic cell adhesion, GO:0008013: beta-catenin binding, GO:0008285: negative regulation of cell proliferat…	04514: Cell adhesion molecules (CAMs), 04670: Leukocyte transendothelial migration	15.1389	3.01459e-11	1.28789e-08	7.57939e-09	-1.79389	0.0907775	0.431968	0.363061	3.51872	0.00286111	0.230406	0.178326	-1.57812	-4.09854	0.00197679	0.194592	0.128006	1.06665	0.68766	0.506608	0.790444	0.766812	3.3286	11.1419	6.69956e-07	6.94935e-05	4.10666e-05	5.60301	16.5627	3.39907e-09	4.75983e-06	2.80121e-06	5.94937	5.86078	5.66918	5.15968	5.06689	5.46044	4.95443	7.8695	7.2852	7.40287	7.63606
259011_at	259011		Olfr389	olfactory receptor 389	GO:0004871: signal transducer activity, GO:0004930: G-protein coupled receptor activity, GO:0004984: olfactory receptor activity, GO:0007165: signal transduction, GO:0007186: G-protein coupled receptor signaling pathway, GO:0007608: sensory perception of smell, GO:0016021: integral to membrane, GO:0050911: detection of chemical stimulus involved in sensory perception of smell	04740: Olfactory transduction	-1.06502	0.301877	0.394357		-1.40498	0.178178	0.546501		3.50875	0.00292193	0.232751		-1.47182	-3.2779	0.00789666	0.276096		1.09864	1.16763	0.268846	0.644251		-1.42345	-3.13013	0.0108842	0.0370539		1.13597	1.47745	0.167268	0.32931		1.54501	1.69209	1.11421	0.901848	0.964989	0.95471	0.826264	1.07016	0.714714	1.06306	0.969053
547267_at	547267		Gm6030	predicted gene 6030			-2.36324	0.0303951	0.0643057		-2.81921	0.0118831	0.213205		3.50857	0.002923	0.232751		-1.90641	-4.55862	0.00094214	0.1767		-1.03498	-0.371327	0.717795	0.89589		-1.85033	-6.66032	6.067e-05	0.000975909		-1.00453	0.120675	0.906098	0.943492		2.5811	2.59532	2.41151	1.58805	1.37572	2.10873	1.1494	1.92752	1.57279	1.57013	1.46065
73300_at	73300		1700031F05Rik	RIKEN cDNA 1700031F05 gene	GO:0003674: molecular_function, GO:0005575: cellular_component, GO:0008150: biological_process		-1.69371	0.108704	0.175096	0.154233	-1.38781	0.183256	0.551468	0.484418	3.50439	0.00294894	0.232858	0.180285	-1.74421	-3.17119	0.00949792	0.281776	0.200405	1.14261	1.63169	0.132411	0.526678	0.477216	-1.8104	-3.56772	0.00524091	0.0218568	0.0147633	1.10083	1.02604	0.326641	0.504925	0.450483	4.5162	4.71293	3.67937	3.57677	3.60741	3.30783	3.73457	3.72824	3.53098	3.35912	3.39645
225998_at	225998	6096	Rorb	RAR-related orphan receptor beta	GO:0003677: DNA binding, GO:0003700: sequence-specific DNA binding transcription factor activity, GO:0003700: sequence-specific DNA binding transcription factor activity, GO:0003707: steroid hormone receptor activity, GO:0004879: ligand-activated sequence-specific DNA binding RNA polymerase II transcription factor activity, GO:0005515: protein binding, GO:0005634: nucleus, GO:0006351: transcripti…	04710: Circadian rhythm - mammal	18.1558	1.66466e-12	1.58761e-09	9.34324e-10	-1.07038	0.299528	0.660334	0.604938	3.49637	0.00299922	0.234762	0.181405	-1.52993	-3.33156	0.0071987	0.273155	0.188611	1.15514	1.51098	0.160359	0.553768	0.50912	5.34618	13.9392	8.33457e-08	2.13939e-05	1.25905e-05	9.44823	20.1018	4.19653e-10	1.76296e-06	1.03752e-06	4.39411	4.21461	4.0142	3.69557	3.34102	3.32324	3.95309	6.88715	6.31731	6.3901	6.85074
20360_at	20360	10500	Sema6c	sema domain, transmembrane domain (TM), and cytoplasmic domain, (semaphorin) 6C	GO:0004872: receptor activity, GO:0005886: plasma membrane, GO:0007275: multicellular organismal development, GO:0007399: nervous system development, GO:0007411: axon guidance, GO:0016020: membrane, GO:0016021: integral to membrane, GO:0030154: cell differentiation, GO:0030215: semaphorin receptor binding	04360: Axon guidance	0.600757	0.555989	0.638842	0.621471	0.297057	0.77005	0.919119	0.899301	3.49493	0.00300833	0.234762	0.181405	-1.32459	-2.29122	0.0439492	0.457303	0.346421	1.34129	2.81095	0.0176889	0.357839	0.304521	-1.27338	-2.03768	0.0693518	0.141202	0.116587	1.39523	3.15063	0.00910144	0.0483989	0.0316481	4.2471	4.48633	4.57349	3.625	3.97622	4.16513	4.29479	4.44119	3.92199	3.66941	4.22333
100125261_at	100125261		Trbj2-7	T cell receptor beta joining 2-7			-0.746754	0.465495	0.556976	0.536448	0.185905	0.854737	0.949994	0.937184	3.48486	0.00307292	0.23759	0.18455	-1.37665	-2.56735	0.0272137	0.394798	0.288191	1.4207	2.59597	0.0257721	0.378564	0.321493	-1.56242	-4.68924	0.000891914	0.00617709	0.00384775	1.25178	1.46798	0.169777	0.33264	0.277427	3.8412	4.03227	4.04	3.14599	3.88874	3.29721	3.60482	3.6057	3.3639	3.16809	3.13327
171272_at	171272		Vmn1r219	vomeronasal 1 receptor 219	GO:0005550: pheromone binding, GO:0005887: integral to plasma membrane, GO:0016503: pheromone receptor activity, GO:0019236: response to pheromone		-2.77097	0.0131492	0.0332295		-0.0979817	0.923102	0.974074		3.48483	0.0030731	0.23759		-1.26123	-2.21819	0.0498373	0.474197		1.20409	2.3783	0.0376678	0.407828		-1.54566	-5.03263	0.00053698	0.00428462		-1.0178	-0.233565	0.819561	0.890962		1.78462	1.47856	1.44629	1.09267	1.25815	1.25676	1.3533	0.908695	0.894551	0.895522	1.09083
116732_at	116732	114960	Tsga13	testis specific gene A13	GO:0003674: molecular_function, GO:0005575: cellular_component, GO:0008150: biological_process		-4.47041	0.000342459	0.00182072		-0.264287	0.794761	0.927639		3.48169	0.0030935	0.23759		-1.22134	-2.04851	0.0665766	0.516978		1.15368	2.3584	0.0389918	0.409439		-1.60663	-6.62082	6.37016e-05	0.00100711		-1.14024	-1.50653	0.15976	0.320037		1.79755	1.79811	1.89618	1.4394	1.48573	1.76777	1.45274	1.08465	1.1047	1.16449	1.23092
434586_at	434586		Igkv4-71	immunoglobulin kappa chain variable 4-71	GO:0003674: molecular_function, GO:0005575: cellular_component, GO:0008150: biological_process		-0.693584	0.497384	0.586091		0.138712	0.891321	0.963365		3.48123	0.00309653	0.23759		-1.19507	-1.87036	0.0897868	0.561023		1.18273	2.50234	0.0303516	0.388401		-1.25858	-2.91874	0.0155723	0.0478951		1.12305	1.44627	0.175651	0.339926		1.06901	0.807775	0.888069	0.670235	0.633793	0.687688	0.682471	0.558823	0.619536	0.685401	0.506018
19328_at	19328	201475	Rab12	RAB12, member RAS oncogene family	GO:0000166: nucleotide binding, GO:0005525: GTP binding, GO:0005794: Golgi apparatus, GO:0006810: transport, GO:0007264: small GTPase mediated signal transduction, GO:0015031: protein transport, GO:0016020: membrane, GO:0030141: secretory granule		1.04224	0.31201	0.404782	0.38106	-2.88151	0.0104216	0.206909	0.149564	3.47535	0.00313517	0.23759	0.186087	-1.52049	-4.13753	0.00185446	0.192005	0.127122	-1.03055	-0.388489	0.705434	0.889546	0.878008	-1.14419	-1.54245	0.154465	0.252902	0.223697	1.28949	3.05109	0.0108818	0.0546714	0.0361039	6.93467	6.94069	7.19724	6.59024	6.39618	6.40146	6.296	6.61834	6.91087	6.86421	6.92645
103712_at	103712	728392	6330403K07Rik	RIKEN cDNA 6330403K07 gene	GO:0003674: molecular_function, GO:0005575: cellular_component, GO:0008150: biological_process		-0.0238592	0.981245	0.986489	0.985163	-0.953575	0.353766	0.698245	0.644768	3.4752	0.00313615	0.23759	0.186087	-1.68053	-3.21726	0.00876937	0.280608	0.198822	1.23905	1.8252	0.0965846	0.490829	0.441793	-1.50556	-3.45498	0.00631595	0.0250118	0.0171	1.38305	2.1998	0.0498148	0.149765	0.110671	4.06126	3.82715	4.04318	2.53405	2.93854	3.619	3.56579	3.82303	3.01387	3.2634	3.33938
100124347_at	100124347		Traj41	T cell receptor alpha joining 41			-0.500355	0.62329	0.698469		-2.53437	0.0214746	0.259179		3.46947	0.00317426	0.23759		-1.92559	-4.45157	0.00111658	0.179585		-1.01564	-0.0489239	0.9619	0.988828		-1.51556	-3.68867	0.00429663	0.0189405		1.25099	1.79219	0.100281	0.236351		3.40425	3.31206	3.61084	2.18464	2.57629	2.99967	2.05631	2.68912	3.25798	2.76182	2.58544
14365_at	14365	7976	Fzd3	frizzled homolog 3 (Drosophila)	GO:0001736: establishment of planar polarity, GO:0001764: neuron migration, GO:0001843: neural tube closure, GO:0001944: vasculature development, GO:0004871: signal transducer activity, GO:0004888: transmembrane signaling receptor activity, GO:0004930: G-protein coupled receptor activity, GO:0005515: protein binding, GO:0005737: cytoplasm, GO:0005737: cytoplasm, GO:0005886: plasma membrane, GO:00…	04310: Wnt signaling pathway, 04916: Melanogenesis, 05200: Pathways in cancer, 05217: Basal cell carcinoma	1.86688	0.0793993	0.136405	0.117534	-3.93798	0.00107477	0.0900018	0.0592679	3.46832	0.00318194	0.23759	0.186432	-2.1933	-5.90275	0.00012816	0.0976953	0.0592089	-1.1596	-1.50534	0.161782	0.554543	0.510237	-1.1308	-1.69673	0.121075	0.211506	0.183474	1.67265	3.40915	0.00573522	0.0353366	0.022693	5.65726	5.61126	5.52152	4.34255	4.09143	4.94823	4.33009	5.3564	5.37368	5.4389	5.50781
258310_at	258310	26493	Olfr145	olfactory receptor 145	GO:0004871: signal transducer activity, GO:0004930: G-protein coupled receptor activity, GO:0004984: olfactory receptor activity, GO:0005886: plasma membrane, GO:0007165: signal transduction, GO:0007186: G-protein coupled receptor signaling pathway, GO:0007186: G-protein coupled receptor signaling pathway, GO:0007608: sensory perception of smell, GO:0016020: membrane, GO:0016021: integral to memb…	04740: Olfactory transduction	-0.832455	0.416784	0.509482		0.077447	0.939179	0.980047		3.46796	0.00318436	0.23759		-1.37725	-2.55831	0.0276458	0.397513		1.37522	2.5534	0.0277628	0.380888		-1.55606	-4.42124	0.0013409	0.00822554		1.21719	1.42061	0.182816	0.349085		1.79211	1.70888	1.865	1.00015	1.79941	1.192	1.18808	0.768995	1.19032	1.22941	1.35565
67687_at	67687	646603	1700011L22Rik	RIKEN cDNA 1700011L22 gene	GO:0003674: molecular_function, GO:0005575: cellular_component, GO:0008150: biological_process		-2.36115	0.0305229	0.0644786		0.231365	0.819814	0.937366		3.46515	0.0032033	0.23759		-1.24043	-1.95738	0.0776399	0.537045		1.25688	2.91924	0.0146345	0.339354		-1.54749	-5.41327	0.000312095	0.00293204		1.00748	0.102122	0.920476	0.952889		3.72434	3.53204	3.81217	3.35428	3.09873	3.62891	3.40268	3.17105	3.03539	2.95464	3.08743
233107_at	233107	79047	Kctd15	potassium channel tetramerisation domain containing 15	GO:0003674: molecular_function, GO:0005216: ion channel activity, GO:0005575: cellular_component, GO:0008150: biological_process, GO:0034220: ion transmembrane transport, GO:0051260: protein homooligomerization		-3.17824	0.00554125	0.0170374	0.0121023	-1.32997	0.201234	0.569159	0.505437	3.46457	0.0032072	0.23759	0.186432	-1.55256	-3.22194	0.00869868	0.280139	0.198294	1.12944	1.42308	0.183806	0.575602	0.531477	-1.93093	-6.75653	5.39205e-05	0.000917705	0.000550866	-1.10117	-0.59045	0.566678	0.713448	0.674713	6.03637	5.83927	6.10109	4.80345	5.40518	5.72102	5.37293	4.82065	5.02879	4.95628	5.33293
15945_at	15945	3627	Cxcl10	chemokine (C-X-C motif) ligand 10	GO:0002690: positive regulation of leukocyte chemotaxis, GO:0005125: cytokine activity, GO:0005576: extracellular region, GO:0005615: extracellular space, GO:0005615: extracellular space, GO:0005623: cell, GO:0006935: chemotaxis, GO:0006954: inflammatory response, GO:0006955: immune response, GO:0007165: signal transduction, GO:0008009: chemokine activity, GO:0008284: positive regulation of cell …	04060: Cytokine-cytokine receptor interaction, 04062: Chemokine signaling pathway, 04620: Toll-like receptor signaling pathway, 04622: RIG-I-like receptor signaling pathway, 04623: Cytosolic DNA-sensing pathway	1.2254	0.237259	0.325249	0.301508	3.97098	0.00100083	0.0873355	0.0571307	3.46365	0.00321347	0.23759	0.186432	1.3882	1.10326	0.294763	0.765314	0.688043	4.85365	6.42888	6.11211e-05	0.0266337	0.0165292	-1.46509	-4.49549	0.00119645	0.00762487	0.00480169	2.38645	2.95311	0.0129771	0.0612802	0.0408813	3.76866	3.60125	3.80087	3.6689	3.28902	4.61735	4.72517	3.34315	2.98017	3.11704	3.23534
634331_at	634331		Gm7133	predicted gene 7133	GO:0003674: molecular_function, GO:0005575: cellular_component, GO:0008150: biological_process		-2.30943	0.0338527	0.0698904		-1.55256	0.139088	0.502777		3.46286	0.00321882	0.23759		-1.41731	-3.42898	0.00608885	0.263448		1.0831	0.882449	0.397333	0.728059		-1.50408	-4.92368	0.000629622	0.00481354		1.02062	0.144703	0.887531	0.93244		1.35733	1.66723	1.36956	1.08596	0.980109	0.863978	0.936233	0.780076	0.914751	0.925316	0.907473
18197_at	18197	51617	Nsg2	neuron specific gene family member 2	GO:0005768: endosome, GO:0005794: Golgi apparatus, GO:0007212: dopamine receptor signaling pathway, GO:0016020: membrane, GO:0016021: integral to membrane, GO:0031410: cytoplasmic vesicle, GO:0050780: dopamine receptor binding		-0.588837	0.563774	0.645871	0.628799	-1.226	0.237042	0.604484	0.543851	3.45969	0.00324041	0.23759	0.186432	-1.60029	-4.41562	0.00118256	0.179871	0.117933	1.13229	1.08083	0.30403	0.668991	0.633384	-1.45105	-2.8403	0.0177955	0.0527201	0.0389061	1.24875	2.11389	0.0578817	0.16564	0.124042	4.01719	4.38114	4.3217	3.58254	3.39767	3.56946	3.71401	4.24466	3.48264	3.44183	3.51073
74732_at	74732	8676	Stx11	syntaxin 11	GO:0005484: SNAP receptor activity, GO:0005794: Golgi apparatus, GO:0006810: transport, GO:0006886: intracellular protein transport, GO:0015031: protein transport, GO:0016020: membrane, GO:0016192: vesicle-mediated transport	04130: SNARE interactions in vesicular transport	-1.92305	0.0715233	0.125553	0.10755	2.31945	0.0331825	0.302737	0.236272	3.45938	0.00324252	0.23759	0.186432	-1.04333	-0.471392	0.647085	0.92152	0.887016	1.65933	5.14385	0.000375566	0.0706457	0.0448473	-1.64857	-5.56968	0.000251207	0.00252454	0.00153528	1.05013	0.47007	0.647376	0.773427	0.740186	3.96588	3.85096	3.93868	3.68147	3.43566	4.13233	4.07201	3.36787	3.23757	2.89827	3.24783
12394_at	12394	861	Runx1	runt related transcription factor 1	GO:0000975: regulatory region DNA binding, GO:0001501: skeletal system development, GO:0001701: in utero embryonic development, GO:0001889: liver development, GO:0002318: myeloid progenitor cell differentiation, GO:0003677: DNA binding, GO:0003677: DNA binding, GO:0003700: sequence-specific DNA binding transcription factor activity, GO:0003700: sequence-specific DNA binding transcription factor a…	05200: Pathways in cancer, 05220: Chronic myeloid leukemia, 05221: Acute myeloid leukemia	-10.1001	1.4431e-08	7.28956e-07	4.31593e-07	-2.11296	0.0498183	0.351205	0.282278	3.45127	0.00329841	0.239734	0.187324	-1.70794	-3.69756	0.00385483	0.235837	0.154966	1.05047	0.49546	0.630505	0.855424	0.839882	-4.26292	-17.2209	1.12111e-08	8.21228e-06	4.83301e-06	-2.37603	-6.14563	6.87612e-05	0.00179899	0.00107546	7.04966	6.6949	6.74615	5.4954	5.99112	6.17647	6.44393	4.7588	4.80999	4.65462	4.76048
68487_at	68487	55281	Tmem140	transmembrane protein 140	GO:0003674: molecular_function, GO:0005575: cellular_component, GO:0008150: biological_process, GO:0016020: membrane, GO:0016021: integral to membrane		-8.83721	9.77508e-08	3.00477e-06	1.78356e-06	-0.490708	0.629956	0.857695	0.823569	3.44739	0.00332556	0.239734	0.187324	-1.35121	-2.75251	0.0196981	0.351275	0.255846	1.19319	1.96315	0.0767217	0.46641	0.416121	-2.91188	-11.0183	7.42185e-07	7.39427e-05	4.36888e-05	-1.80609	-5.63017	0.000146352	0.00296063	0.00177513	4.87112	4.90208	4.82712	4.07555	4.40824	4.5444	4.64186	3.61428	3.09819	3.13806	3.38906
212670_at	212670	117155	Catsper2	cation channel, sperm associated 2	GO:0001539: ciliary or flagellar motility, GO:0005216: ion channel activity, GO:0005244: voltage-gated ion channel activity, GO:0005262: calcium channel activity, GO:0005886: plasma membrane, GO:0005929: cilium, GO:0006810: transport, GO:0006811: ion transport, GO:0006816: calcium ion transport, GO:0007275: multicellular organismal development, GO:0007283: spermatogenesis, GO:0009434: microtubule…		-1.86627	0.0794891	0.136541	0.117655	-0.475955	0.640213	0.862591	0.828854	3.44327	0.00335456	0.239734	0.187324	-1.25582	-2.19635	0.0517407	0.480183	0.369178	1.14478	2.21837	0.0496709	0.423691	0.370261	-1.38517	-4.08696	0.00226139	0.01199	0.00775618	1.03788	0.492277	0.632084	0.762566	0.727863	3.86791	3.6627	3.92288	3.26462	3.47002	3.59302	3.61965	3.46146	3.25012	3.33667	3.35209
76877_at	76877	9609	Rab36	RAB36, member RAS oncogene family	GO:0000166: nucleotide binding, GO:0005525: GTP binding, GO:0005575: cellular_component, GO:0005794: Golgi apparatus, GO:0006810: transport, GO:0007264: small GTPase mediated signal transduction, GO:0015031: protein transport, GO:0016020: membrane		1.03583	0.314906	0.407721	0.384027	-0.313578	0.757686	0.9141	0.892821	3.4431	0.00335573	0.239734	0.187324	-1.37066	-2.28337	0.0445483	0.458215	0.34732	1.2492	3.07489	0.0111503	0.32187	0.266458	-1.21434	-2.0721	0.0654854	0.135386	0.111273	1.41001	2.96763	0.0126428	0.0601725	0.0401161	4.35804	4.68643	4.60543	4.41392	3.5434	3.98343	4.31345	4.51329	4.14164	4.13982	4.27807
80859_at	80859	64332	Nfkbiz	nuclear factor of kappa light polypeptide gene enhancer in B cells inhibitor, zeta	GO:0005634: nucleus, GO:0006351: transcription, DNA-dependent, GO:0006355: regulation of transcription, DNA-dependent, GO:0006954: inflammatory response		-8.10202	3.24555e-07	7.41008e-06	4.4048e-06	4.93785	0.000127636	0.033167	0.02058	3.44085	0.00337168	0.239734	0.187324	1.20804	1.91843	0.0828746	0.54865	0.439306	2.04192	6.48126	5.70313e-05	0.0264399	0.0164579	-2.8482	-10.1259	1.60265e-06	0.000113917	6.723e-05	-1.68506	-5.11782	0.000321771	0.00493643	0.00298695	6.65822	6.44207	6.8499	6.9954	6.91215	6.96254	6.85526	5.27548	5.27197	5.17518	4.83194
73072_at	73072	80164	BC068157	cDNA sequence BC068157	GO:0003674: molecular_function, GO:0005575: cellular_component, GO:0008150: biological_process		-2.16403	0.0451087	0.0875431		0.878789	0.391863	0.725143		3.44033	0.0033754	0.239734		-1.14585	-1.39242	0.192822	0.686521		1.25497	3.24294	0.00832395	0.29803		-1.40664	-4.31351	0.00158422	0.00921151		1.0223	0.250017	0.807126	0.883433		2.67556	2.8402	2.58853	2.61375	2.42533	2.56407	2.42222	2.08392	2.29466	2.21421	2.2507
16011_at	16011	3488	Igfbp5	insulin-like growth factor binding protein 5	GO:0001558: regulation of cell growth, GO:0001968: fibronectin binding, GO:0005520: insulin-like growth factor binding, GO:0005520: insulin-like growth factor binding, GO:0005576: extracellular region, GO:0006006: glucose metabolic process, GO:0010906: regulation of glucose metabolic process, GO:0014912: negative regulation of smooth muscle cell migration, GO:0016942: insulin-like growth factor b…		3.13386	0.00609382	0.0183142	0.0131084	-2.85173	0.0110972	0.210154	0.152705	3.43406	0.00342029	0.241363	0.188141	-1.99281	-5.51413	0.000222236	0.106275	0.0637239	-1.03793	-0.350625	0.732819	0.901936	0.892206	1.03795	0.263719	0.797433	0.854624	0.841152	1.99286	4.98245	0.000398702	0.00568401	0.00344836	8.30193	8.04949	8.41801	6.91127	7.13015	7.49833	7.45947	8.25955	8.05763	8.67658	8.20312
74519_at	74519		Cyp2j9	cytochrome P450, family 2, subfamily j, polypeptide 9	GO:0003674: molecular_function, GO:0004497: monooxygenase activity, GO:0005575: cellular_component, GO:0008150: biological_process, GO:0016491: oxidoreductase activity, GO:0046872: metal ion binding, GO:0055114: oxidation-reduction process	00590: Arachidonic acid metabolism, 00591: Linoleic acid metabolism, 01100: Metabolic pathways	-0.118133	0.907358	0.931527	0.926661	-1.15674	0.263501	0.628023	0.568616	3.43253	0.00343134	0.241363	0.188141	-1.52218	-3.03449	0.0120439	0.309996	0.221381	1.1431	1.65027	0.128516	0.52441	0.475096	-1.38116	-2.98185	0.0139896	0.0443239	0.0320943	1.2598	2.13306	0.0559808	0.162041	0.120911	4.9279	4.5114	4.69548	3.8697	3.97471	4.62048	3.84789	4.51286	4.08626	3.99777	4.36636
19659_at	19659	5947	Rbp1	retinol binding protein 1, cellular	GO:0005215: transporter activity, GO:0005501: retinoid binding, GO:0005737: cytoplasm, GO:0006810: transport, GO:0008289: lipid binding, GO:0016918: retinal binding, GO:0019841: retinol binding, GO:0030852: regulation of granulocyte differentiation, GO:0033189: response to vitamin A, GO:0042572: retinol metabolic process, GO:0042572: retinol metabolic process, GO:0042572: retinol metabolic proces…		-1.04505	0.310749	0.403399	0.379679	-1.98678	0.0634397	0.379824	0.31089	3.42975	0.00345152	0.241664	0.188141	-1.59956	-4.24789	0.00154932	0.184371	0.120553	1.0314	0.451937	0.660529	0.87002	0.85648	-1.4411	-2.96854	0.0143091	0.0450505	0.0326806	1.14481	1.6216	0.132833	0.283289	0.229682	8.44678	8.55744	8.10976	7.55396	7.68097	7.72103	7.85196	7.79806	7.85103	7.45909	8.21713
69430_at	69430		1700048O20Rik	RIKEN cDNA 1700048O20 gene	GO:0003674: molecular_function, GO:0005575: cellular_component, GO:0008150: biological_process		5.09808	9.14525e-05	0.0006264	0.000383547	-1.94304	0.0688943	0.393152	0.323206	3.42654	0.00347497	0.241975	0.188141	-1.48944	-3.3654	0.00679133	0.273155	0.188464	1.04206	0.640529	0.535589	0.807855	0.785694	1.20729	2.15384	0.0571109	0.122393	0.099458	1.87381	6.3189	5.37809e-05	0.00153257	0.000916433	4.44897	4.17249	4.28876	3.4113	3.63999	3.74016	4.06373	4.66835	4.45798	4.43605	4.73308
474332_at	474332		Dnm3os	dynamin 3, opposite strand	GO:0001501: skeletal system development, GO:0003674: molecular_function, GO:0005575: cellular_component, GO:0030282: bone mineralization		0.549675	0.589747	0.669693	0.652908	-2.64639	0.0170466	0.240177	0.180481	3.42651	0.00347516	0.241975	0.188141	-1.90731	-4.81781	0.0006286	0.160692	0.10067	-1.02828	-0.177043	0.862851	0.954156	0.949098	-1.30419	-2.47106	0.0333878	0.0826856	0.0643131	1.42223	2.71076	0.0200643	0.0819278	0.0561467	4.46709	4.49041	4.34227	3.05515	3.25252	3.80295	3.76074	4.46823	3.88026	3.7658	3.98781
93715_at	93715	56108	Pcdhga7	protocadherin gamma subfamily A, 7	GO:0003674: molecular_function, GO:0005886: plasma membrane, GO:0007155: cell adhesion, GO:0016020: membrane, GO:0016021: integral to membrane		4.64022	0.000238729	0.00136598	0.000852459	-1.03246	0.316433	0.670722	0.616538	3.41937	0.00352788	0.243546	0.189611	-1.83248	-3.34485	0.00703581	0.273155	0.188464	1.29424	1.66523	0.125455	0.520187	0.471696	1.33152	2.34255	0.0415333	0.097051	0.0770036	3.15792	6.09633	7.37951e-05	0.00187887	0.00112505	4.15479	4.66676	4.66168	3.90225	4.03244	2.80728	3.52891	4.84003	5.07916	4.57854	5.14214
258508_at	258508		Olfr99	olfactory receptor 99	GO:0004871: signal transducer activity, GO:0004930: G-protein coupled receptor activity, GO:0004984: olfactory receptor activity, GO:0007165: signal transduction, GO:0007186: G-protein coupled receptor signaling pathway, GO:0007608: sensory perception of smell, GO:0016021: integral to membrane, GO:0050911: detection of chemical stimulus involved in sensory perception of smell	04740: Olfactory transduction	-0.234599	0.817344	0.860998		-0.153173	0.880079	0.959912		3.41823	0.00353637	0.243546		-1.39403	-2.41476	0.0354886	0.430946		1.30029	2.56096	0.0273983	0.380888		-1.4203	-3.16074	0.0103363	0.0356558		1.27624	1.98698	0.0720812	0.190764		1.6122	1.86736	2.24658	1.32671	1.78819	1.42709	1.2027	1.50071	1.44672	1.26943	1.4771
667604_at	667604		Trav8d-2	T cell receptor alpha variable 8D-2			0.0448297	0.96477	0.97463		0.206582	0.83881	0.944516		3.41316	0.00357437	0.244825		-1.27691	-2.35594	0.039298	0.444789		1.30426	2.41959	0.0350593	0.402837		-1.30302	-3.48761	0.00598316	0.0240512		1.27812	1.96487	0.0748657	0.195288		2.04725	1.90478	1.83781	1.63648	1.4076	1.80226	1.43762	1.55554	1.44836	1.56033	1.6328
20737_at	20737	6693	Spn	sialophorin	GO:0001562: response to protozoan, GO:0001808: negative regulation of type IV hypersensitivity, GO:0001931: uropod, GO:0005515: protein binding, GO:0005604: basement membrane, GO:0005615: extracellular space, GO:0005887: integral to plasma membrane, GO:0005902: microvillus, GO:0007162: negative regulation of cell adhesion, GO:0007162: negative regulation of cell adhesion, GO:0007166: cell surface…	04514: Cell adhesion molecules (CAMs)	-0.0594415	0.953299	0.965907	0.9633	0.709319	0.487817	0.781188	0.738546	3.41135	0.00358798	0.245091	0.191454	-1.2102	-1.69863	0.119031	0.60255	0.496143	1.32997	3.19254	0.0090851	0.308209	0.250965	-1.29928	-2.81593	0.0185495	0.0543989	0.0402462	1.23879	2.06178	0.0633601	0.175732	0.132677	4.02577	3.83429	3.65592	3.31571	3.52533	3.79685	3.60629	3.65159	3.34607	3.52587	3.32684
93703_at	93703	56100	Pcdhgb6	protocadherin gamma subfamily B, 6	GO:0003674: molecular_function, GO:0008150: biological_process, GO:0016020: membrane		2.65518	0.0167386	0.0402339	0.0308666	-3.19918	0.00529798	0.165719	0.11659	3.4087	0.00360808	0.245798	0.191836	-1.62763	-4.35598	0.0013012	0.18216	0.119185	-1.06655	-0.803695	0.439431	0.752556	0.724793	-1.0135	-0.209913	0.838015	0.884178	0.873831	1.50575	4.24191	0.00134709	0.0131353	0.00808692	5.07437	5.20422	5.09296	4.0508	4.59792	4.55023	4.42899	5.34163	5.02426	4.95117	5.07459
227449_at	227449	54877	Zcchc2	zinc finger, CCHC domain containing 2	GO:0003674: molecular_function, GO:0003676: nucleic acid binding, GO:0005737: cytoplasm, GO:0007154: cell communication, GO:0008150: biological_process, GO:0008270: zinc ion binding, GO:0035091: phosphatidylinositol binding, GO:0046872: metal ion binding		-5.24383	6.76984e-05	0.000490487	0.000299683	0.151049	0.881729	0.96019	0.949681	3.40582	0.00363008	0.246509	0.192316	-1.20298	-1.77608	0.104909	0.582582	0.475618	1.1935	2.86824	0.0160006	0.348584	0.291511	-1.74294	-6.83704	4.88956e-05	0.000864279	0.000517344	-1.21395	-2.26492	0.0444264	0.139211	0.101732	6.39243	6.11249	6.33593	5.78821	6.139	6.03413	6.08881	5.3583	5.46267	5.55288	5.55231
15220_at	15220	94234	Foxq1	forkhead box Q1	GO:0000122: negative regulation of transcription from RNA polymerase II promoter, GO:0003677: DNA binding, GO:0003690: double-stranded DNA binding, GO:0003700: sequence-specific DNA binding transcription factor activity, GO:0003705: RNA polymerase II distal enhancer sequence-specific DNA binding transcription factor activity, GO:0005634: nucleus, GO:0005667: transcription factor complex, GO:00063…		-9.14557	6.02558e-08	2.08592e-06	1.23778e-06	-1.4123	0.176047	0.544951	0.477199	3.3981	0.00368962	0.248437	0.193904	-1.77713	-3.17248	0.00947661	0.281776	0.200405	1.15322	1.56754	0.146678	0.540621	0.492471	-5.33455	-12.3803	2.52889e-07	3.93477e-05	2.31566e-05	-2.60295	-6.23258	6.07535e-05	0.00166451	0.00099582	5.6714	4.85743	5.3199	4.29706	3.94885	4.40408	5.07392	2.69582	2.9918	2.7424	3.14431
66361_at	66361	79752	Zfand1	zinc finger, AN1-type domain 1	GO:0003674: molecular_function, GO:0005575: cellular_component, GO:0008150: biological_process, GO:0008270: zinc ion binding, GO:0046872: metal ion binding		-0.349965	0.730697	0.789977	0.777183	-0.0997425	0.921725	0.973504	0.966964	3.39474	0.00371582	0.248437	0.193904	-1.35237	-2.15027	0.0559889	0.490968	0.379324	1.30765	3.29974	0.00754382	0.286145	0.230898	-1.43512	-4.4479	0.00128703	0.00799308	0.00504854	1.23225	1.67756	0.121244	0.267093	0.214699	5.75074	5.56708	5.62565	5.01294	5.61182	5.42168	4.6119	5.25765	5.22144	4.98051	5.0359
387135_at	387135		Mir18	microRNA 18	GO:0001701: in utero embryonic development, GO:0001783: B cell apoptotic process, GO:0002329: pre-B cell differentiation, GO:0021522: spinal cord motor neuron differentiation, GO:0030324: lung development, GO:0030424: axon, GO:0043066: negative regulation of apoptotic process, GO:0060412: ventricular septum morphogenesis, GO:0071241: cellular response to inorganic substance, GO:0071391: cellular …		-1.40182	0.179102	0.260304	0.23713	-2.23025	0.0396111	0.323359	0.254392	3.39301	0.00372938	0.248509	0.193904	-1.71234	-4.86276	0.000586566	0.153431	0.0962495	1.03957	0.20406	0.842217	0.945693	0.939498	-1.56673	-4.48709	0.00121193	0.00768886	0.00484575	1.13618	0.911679	0.381248	0.557571	0.505491	4.51535	4.13493	4.23554	3.41655	3.33854	3.6581	3.67106	3.40422	3.87641	3.61995	3.68677
17873_at	17873	4616	Gadd45b	growth arrest and DNA-damage-inducible 45 beta	GO:0000186: activation of MAPKK activity, GO:0005515: protein binding, GO:0005634: nucleus, GO:0006469: negative regulation of protein kinase activity, GO:0006915: apoptotic process, GO:0006950: response to stress, GO:0007275: multicellular organismal development, GO:0030154: cell differentiation, GO:0051726: regulation of cell cycle	04010: MAPK signaling pathway, 04110: Cell cycle, 04115: p53 signaling pathway	-5.24249	6.78845e-05	0.000491553	0.000300328	0.757236	0.459357	0.764514	0.720377	3.3903	0.00375072	0.248509	0.193904	-1.28167	-1.79205	0.102194	0.577427	0.470937	1.49423	3.34103	0.00702404	0.27946	0.226184	-2.62678	-9.56773	2.67166e-06	0.00015133	8.94615e-05	-1.37161	-2.3435	0.0386667	0.126889	0.0916709	6.6384	6.34453	6.95099	6.02415	6.07023	6.48283	6.57253	5.24699	5.31029	5.2765	5.25564
21938_at	21938	7133	Tnfrsf1b	tumor necrosis factor receptor superfamily, member 1b	GO:0005031: tumor necrosis factor-activated receptor activity, GO:0005031: tumor necrosis factor-activated receptor activity, GO:0005515: protein binding, GO:0005634: nucleus, GO:0006954: inflammatory response, GO:0006955: immune response, GO:0007166: cell surface receptor signaling pathway, GO:0008219: cell death, GO:0008283: cell proliferation, GO:0016020: membrane, GO:0016021: integral to memb…	04060: Cytokine-cytokine receptor interaction, 04920: Adipocytokine signaling pathway, 05014: Amyotrophic lateral sclerosis (ALS)	-2.60389	0.0186129	0.0438301	0.033882	3.06359	0.00708097	0.182417	0.13016	3.38959	0.00375632	0.248509	0.193904	1.0208	0.238297	0.816276	0.968632	0.952761	2.01563	4.48856	0.00103679	0.122118	0.0818068	-1.9339	-6.54973	6.95782e-05	0.00106808	0.000641868	1.02103	-0.122537	0.904657	0.942537	0.932711	5.92967	5.87914	6.18756	5.99247	5.95855	6.15681	6.02392	5.2154	5.08402	5.14525	4.72216
20750_at	20750	6696	Spp1	secreted phosphoprotein 1	GO:0001503: ossification, GO:0001649: osteoblast differentiation, GO:0005125: cytokine activity, GO:0005576: extracellular region, GO:0005615: extracellular space, GO:0005737: cytoplasm, GO:0006916: anti-apoptosis, GO:0007155: cell adhesion, GO:0010033: response to organic substance, GO:0010811: positive regulation of cell-substrate adhesion, GO:0030593: neutrophil chemotaxis, GO:0030593: neutrop…	04510: Focal adhesion, 04512: ECM-receptor interaction, 04620: Toll-like receptor signaling pathway	-3.9	0.00116668	0.00491928	0.00321863	2.17767	0.0439221	0.336461	0.266525	3.38638	0.00378185	0.249038	0.193904	-1.18244	-0.75598	0.466423	0.849531	0.799783	2.11218	4.25847	0.0015021	0.146289	0.102212	-3.25428	-4.84558	0.000706451	0.00521582	0.00322744	-1.30301	-2.665	0.0217827	0.086441	0.0597403	6.31849	7.27501	6.34165	6.54318	6.71319	6.2402	6.36307	5.82588	4.99456	4.42371	4.27198
73692_at	73692	65250	2410089E03Rik	RIKEN cDNA 2410089E03 gene	GO:0003674: molecular_function, GO:0005575: cellular_component, GO:0008150: biological_process, GO:0016020: membrane, GO:0016021: integral to membrane		6.36226	7.35197e-06	8.21426e-05	4.94151e-05	-2.25921	0.0374071	0.317599	0.249158	3.38468	0.00379538	0.249038	0.193904	-1.49109	-3.57536	0.00474193	0.24901	0.16435	1.01217	0.218635	0.831136	0.941809	0.936717	1.3255	3.30701	0.00808382	0.029807	0.0207287	2.00048	7.24296	1.54992e-05	0.000712908	0.000424983	5.88382	5.8025	6.00356	5.1261	5.1368	5.64483	5.31973	6.38457	6.13418	6.21443	6.46501
100642166_at	100642166		LOC100642166	uncharacterized LOC100642166			-0.561813	0.581633	0.662209	0.645176	-2.86826	0.0107172	0.207958	0.150263	3.38363	0.00380384	0.249038	0.193904	-2.11715	-4.60281	0.000878748	0.173676	0.10994	-1.04345	-0.49425	0.631331	0.855647	0.840226	-1.59892	-4.60726	0.00100929	0.00676063	0.00422576	1.26898	1.57009	0.144353	0.299537	0.24513	5.05136	4.85765	4.59487	3.07681	3.74948	3.78301	4.22563	4.21413	3.90954	4.19772	4.32502
107986_at	107986	1643	Ddb2	damage specific DNA binding protein 2	GO:0000209: protein polyubiquitination, GO:0003677: DNA binding, GO:0005634: nucleus, GO:0006281: DNA repair, GO:0006290: pyrimidine dimer repair, GO:0006974: response to DNA damage stimulus, GO:0009411: response to UV, GO:0043234: protein complex, GO:0051865: protein autoubiquitination	03420: Nucleotide excision repair, 04115: p53 signaling pathway, 04120: Ubiquitin mediated proteolysis	-0.482142	0.635902	0.709668	0.694163	-0.917836	0.371643	0.711507	0.660681	3.37654	0.00386107	0.25213	0.196147	-1.38664	-2.72027	0.020839	0.357933	0.261307	1.15358	1.80447	0.0999503	0.492892	0.444187	-1.35257	-4.03343	0.00246225	0.012765	0.00828043	1.18264	1.52959	0.154013	0.312388	0.257481	6.19879	6.17645	6.30911	5.94959	5.91043	5.27883	5.79829	5.80303	5.69086	5.91584	5.75521
71743_at	71743	80347	Coasy	Coenzyme A synthase	GO:0000166: nucleotide binding, GO:0003824: catalytic activity, GO:0004140: dephospho-CoA kinase activity, GO:0004140: dephospho-CoA kinase activity, GO:0004140: dephospho-CoA kinase activity, GO:0004595: pantetheine-phosphate adenylyltransferase activity, GO:0004595: pantetheine-phosphate adenylyltransferase activity, GO:0004595: pantetheine-phosphate adenylyltransferase activity, GO:0004595: pa…	00770: Pantothenate and CoA biosynthesis, 01100: Metabolic pathways	-2.79282	0.0125604	0.0320251	0.02406	-0.169542	0.867387	0.954645	0.942537	3.37143	0.00390284	0.25299	0.196921	-1.2531	-2.51509	0.0298082	0.405695	0.299172	1.194	1.90611	0.084424	0.478308	0.428299	-1.52142	-5.54089	0.00026138	0.00259077	0.00157676	-1.01686	-0.269001	0.792847	0.874175	0.853057	4.6611	4.6243	4.59476	4.35831	4.29192	4.32021	4.23256	4.0519	4.01726	3.8622	4.14097
330490_at	330490		Nlrp9c	NLR family, pyrin domain containing 9C	GO:0000166: nucleotide binding, GO:0003674: molecular_function, GO:0005524: ATP binding, GO:0005575: cellular_component, GO:0005737: cytoplasm, GO:0008150: biological_process		-1.10189	0.285984	0.377646		-0.941827	0.359576	0.70314		3.37054	0.00391018	0.25299		-1.53604	-3.18436	0.00928349	0.280805		1.19143	1.53953	0.153321	0.546757		-1.56424	-3.65213	0.00456161	0.0197526		1.16996	1.27357	0.228754	0.403144		1.37845	1.41091	1.99173	0.990731	0.749993	1.20523	1.03032	0.989872	1.01704	0.72213	1.1462
243864_at	243864	4277	Mill2	MHC I like leukocyte 2	GO:0002429: immune response-activating cell surface receptor signaling pathway, GO:0005515: protein binding, GO:0006979: response to oxidative stress, GO:0009408: response to heat, GO:0031362: anchored to external side of plasma membrane, GO:0032526: response to retinoic acid, GO:0046629: gamma-delta T cell activation, GO:0046703: natural killer cell lectin-like receptor binding, GO:0050689: nega…		2.37707	0.0295613	0.0629114	0.0504269	0.0402042	0.968402	0.989395	0.987644	3.36313	0.00397163	0.25299	0.197295	-1.29631	-2.36798	0.0384872	0.442402	0.332326	1.2618	2.33101	0.0408884	0.411999	0.354832	-1.04159	-0.447292	0.664343	0.748525	0.728611	1.57037	4.23629	0.00135998	0.0131946	0.0081248	5.33335	5.316	5.61137	5.06292	5.03568	5.26946	4.80361	5.65936	5.31999	5.21561	5.23034
631323_at	631323		Gm12250	predicted gene 12250			-5.29364	6.11191e-05	0.000451912	0.000275826	4.21038	0.000597524	0.069088	0.0452228	3.36269	0.00397537	0.25299	0.197295	1.18709	1.29448	0.223475	0.71393	0.624652	2.76049	6.47252	5.76925e-05	0.0264399	0.0164579	-3.38313	-9.05703	4.35919e-06	0.000200868	0.00011886	-1.45484	-2.55467	0.0265449	0.0988463	0.0693496	6.11464	5.30869	5.33974	5.6797	5.76225	5.85021	6.19544	3.97318	3.9261	3.83741	3.77494
239273_at	239273	10257	Abcc4	ATP-binding cassette, sub-family C (CFTR/MRP), member 4	GO:0000166: nucleotide binding, GO:0005524: ATP binding, GO:0005886: plasma membrane, GO:0006855: drug transmembrane transport, GO:0015238: drug transmembrane transporter activity, GO:0016020: membrane, GO:0016323: basolateral plasma membrane, GO:0031088: platelet dense granule membrane, GO:0048661: positive regulation of smooth muscle cell proliferation	02010: ABC transporters, 04976: Bile secretion	3.16796	0.00566477	0.0172948	0.0123105	-3.04128	0.00742582	0.185322	0.13208	3.36152	0.00398513	0.25299	0.197295	-1.54073	-4.11997	0.00190853	0.192005	0.127122	-1.04255	-0.6065	0.557099	0.819905	0.798394	1.01904	0.266259	0.795532	0.853206	0.839624	1.50598	4.73807	0.000590941	0.00744762	0.00455614	6.41639	6.45133	6.09793	5.68047	5.86636	5.6438	5.62345	6.2648	6.27933	6.44021	6.43651
257667_at	257667		Olfr769	olfactory receptor 769	GO:0004871: signal transducer activity, GO:0004930: G-protein coupled receptor activity, GO:0004984: olfactory receptor activity, GO:0007165: signal transduction, GO:0007186: G-protein coupled receptor signaling pathway, GO:0007608: sensory perception of smell, GO:0016021: integral to membrane, GO:0050911: detection of chemical stimulus involved in sensory perception of smell	04740: Olfactory transduction	-1.75814	0.0968544	0.159991		0.0515313	0.959508	0.986434		3.36151	0.00398521	0.25299		-1.37835	-2.65021	0.0235508	0.374066		1.34191	2.26746	0.0456403	0.419245		-1.67861	-4.57709	0.00105654	0.0069624		1.10187	0.61885	0.548464	0.699539		2.14369	2.55152	1.99345	1.69035	1.84398	1.65259	1.93965	1.59002	1.71452	1.34115	1.32393
12738_at	12738	9075	Cldn2	claudin 2	GO:0005198: structural molecule activity, GO:0005515: protein binding, GO:0005886: plasma membrane, GO:0005923: tight junction, GO:0016020: membrane, GO:0016021: integral to membrane, GO:0016338: calcium-independent cell-cell adhesion, GO:0030054: cell junction, GO:0042802: identical protein binding	04514: Cell adhesion molecules (CAMs), 04530: Tight junction, 04670: Leukocyte transendothelial migration, 05160: Hepatitis C	-6.12403	1.16362e-05	0.00011732	7.06264e-05	-2.6331	0.0175225	0.241852	0.181874	3.36093	0.00399006	0.25299	0.197295	-2.04086	-4.065	0.00208881	0.195347	0.12857	-1.03257	-0.261758	0.798584	0.92856	0.922682	-3.23823	-7.76572	1.6708e-05	0.000441385	0.000262508	-1.63838	-3.8741	0.00253161	0.0201362	0.0126274	4.84838	5.70726	5.57915	4.08268	4.70507	4.64535	4.01205	3.89715	3.77562	3.83486	3.34969
319146_at	319146		Ifnz	interferon zeta	GO:0005125: cytokine activity, GO:0005132: interferon-alpha/beta receptor binding, GO:0005576: extracellular region, GO:0005615: extracellular space, GO:0006915: apoptotic process, GO:0009615: response to virus, GO:0019221: cytokine-mediated signaling pathway, GO:0030183: B cell differentiation, GO:0051726: regulation of cell cycle		-2.55295	0.0206712	0.0474534		1.518	0.147533	0.513695		3.36067	0.00399226	0.25299		-1.17834	-1.29686	0.222687	0.713129		1.72839	3.71894	0.0036796	0.218331		-2.04109	-6.77615	5.26464e-05	0.00090211		-1.00219	-0.0893616	0.930381	0.958894		2.65296	2.50103	2.886	2.46863	2.46863	1.97978	2.78076	1.77199	1.87903	1.57216	1.3609
12043_at	12043	596	Bcl2	B cell leukemia/lymphoma 2	GO:0000082: G1/S transition of mitotic cell cycle, GO:0000082: G1/S transition of mitotic cell cycle, GO:0000209: protein polyubiquitination, GO:0000902: cell morphogenesis, GO:0001101: response to acid, GO:0001503: ossification, GO:0001541: ovarian follicle development, GO:0001656: metanephros development, GO:0001657: ureteric bud development, GO:0001658: branching involved in ureteric bud morph…	04141: Protein processing in endoplasmic reticulum, 04210: Apoptosis, 04510: Focal adhesion, 04722: Neurotrophin signaling pathway, 05014: Amyotrophic lateral sclerosis (ALS), 05145: Toxoplasmosis, 05200: Pathways in cancer, 05210: Colorectal cancer, 05215: Prostate cancer, 05222: Small cell lung cancer	-3.30573	0.00421378	0.013779	0.00962835	-3.25138	0.00473627	0.161081	0.112515	3.35627	0.0040294	0.254549	0.198579	-1.78505	-4.9686	0.000498928	0.143525	0.0893202	-1.09093	-0.805924	0.4382	0.752086	0.72382	-1.79886	-5.88927	0.000162951	0.00188357	0.00114074	-1.09937	-0.760654	0.462665	0.629388	0.582266	5.92167	5.93378	5.95166	4.8794	4.87116	5.47809	5.08298	5.44622	4.86969	5.03823	4.92693
258345_at	258345		Olfr1121	olfactory receptor 1121	GO:0004871: signal transducer activity, GO:0004930: G-protein coupled receptor activity, GO:0004984: olfactory receptor activity, GO:0007165: signal transduction, GO:0007186: G-protein coupled receptor signaling pathway, GO:0007608: sensory perception of smell, GO:0016021: integral to membrane, GO:0050911: detection of chemical stimulus involved in sensory perception of smell	04740: Olfactory transduction	-0.326217	0.748273	0.804894		1.39944	0.179803	0.548349		3.35165	0.00406883	0.256397		-1.10367	-1.05079	0.317134	0.773308		1.30671	3.48616	0.00547112	0.249492		-1.24338	-2.84569	0.0176329	0.0523387		1.15988	1.6522	0.126379	0.274518		1.02585	1.11743	0.968809	0.868248	0.891473	0.776183	1.03728	0.782928	0.8347	0.679071	0.588443
245502_at	245502		Gm41	melanoma antigen, family B, 4 pseudogene			-2.00913	0.0608051	0.110525		-0.44154	0.66443	0.875007		3.34392	0.00413558	0.2572		-1.27545	-2.30168	0.0431627	0.45588		1.15813	2.08064	0.062882	0.446427		-1.43905	-4.21798	0.00183917	0.0103178		1.02647	0.357623	0.727311	0.829342		2.02092	2.18324	2.25607	1.63442	1.80587	2.06547	1.67688	1.86072	1.55907	1.55899	1.5207
26457_at	26457	376497	Slc27a1	solute carrier family 27 (fatty acid transporter), member 1	GO:0000166: nucleotide binding, GO:0001579: medium-chain fatty acid transport, GO:0001676: long-chain fatty acid metabolic process, GO:0003824: catalytic activity, GO:0004467: long-chain fatty acid-CoA ligase activity, GO:0005737: cytoplasm, GO:0005739: mitochondrion, GO:0005743: mitochondrial inner membrane, GO:0005783: endoplasmic reticulum, GO:0005886: plasma membrane, GO:0005886: plasma membr…	03320: PPAR signaling pathway	-4.01526	0.0009096	0.00402235	0.00261492	-1.283	0.216843	0.585892	0.522406	3.34375	0.00413704	0.2572	0.201871	-1.38716	-3.13129	0.0101785	0.292213	0.207689	1.10116	1.1103	0.291709	0.660452	0.623517	-1.7298	-6.63263	6.27783e-05	0.000997096	0.000599262	-1.13244	-1.27396	0.22862	0.403092	0.34687	4.92292	4.85758	5.11516	4.44598	4.27288	4.65989	4.58089	4.27854	4.11173	4.0384	4.27183
11875_at	11875	116969	Art5	ADP-ribosyltransferase 5	GO:0003950: NAD+ ADP-ribosyltransferase activity, GO:0003953: NAD+ nucleosidase activity, GO:0003956: NAD(P)+-protein-arginine ADP-ribosyltransferase activity, GO:0005576: extracellular region, GO:0006471: protein ADP-ribosylation, GO:0008152: metabolic process, GO:0016020: membrane, GO:0016740: transferase activity, GO:0016757: transferase activity, transferring glycosyl groups		-1.76549	0.0955768	0.158338		1.24851	0.228897	0.597573		3.33646	0.00420106	0.2572		-1.1352	-1.12149	0.287282	0.761762		1.35562	4.1102	0.00191459	0.16815		-1.46484	-4.37569	0.00143858	0.00863147		1.05056	0.550949	0.592549	0.733838		2.85939	2.98055	3.21858	2.69614	2.7801	3.15922	2.68803	2.45819	2.43527	2.37367	2.62677
54396_at	54396	345611	Irgm2	immunity-related GTPase family M member 2	GO:0003924: GTPase activity, GO:0005794: Golgi apparatus, GO:0020003: symbiont-containing vacuole, GO:0034341: response to interferon-gamma, GO:0034341: response to interferon-gamma, GO:0042742: defense response to bacterium, GO:0042832: defense response to protozoan		-2.18629	0.0431866	0.0846131	0.0696412	2.91413	0.00972735	0.203544	0.146802	3.3349	0.0042149	0.2572	0.202063	1.01757	0.0775096	0.939688	0.989967	0.985018	2.27723	4.77854	0.000656561	0.0979247	0.0636564	-2.09817	-5.80141	0.000183284	0.00202501	0.00122723	1.0666	0.220017	0.829839	0.89664	0.879211	5.28588	4.81521	4.84903	4.74463	4.86996	5.44608	4.93477	4.33773	3.6545	3.71911	3.9083
100504116_at	100504116		Gm20071	predicted gene, 20071			3.81306	0.00140796	0.00570657	0.00377544	-1.44062	0.167999	0.535726	0.467773	3.32981	0.00426026	0.2572	0.202063	-1.45011	-3.54639	0.0049817	0.252441	0.168334	1.07603	0.905299	0.385657	0.719794	0.688723	1.09981	0.75092	0.470266	0.579266	0.551892	1.71611	6.37551	4.96758e-05	0.00146963	0.000879345	4.22911	4.30118	4.5179	3.83344	3.74468	3.64815	4.02128	4.59919	4.04539	4.59322	4.6507
100039672_at	100039672	692094	Msmp	microseminoprotein, prostate associated	GO:0003674: molecular_function, GO:0005575: cellular_component, GO:0005576: extracellular region, GO:0008150: biological_process		-1.61567	0.124714	0.19478	0.173352	0.039462	0.968985	0.989629	0.987818	3.32944	0.00426357	0.2572	0.202063	-1.24917	-1.87193	0.0895525	0.560531	0.451537	1.22488	3.10789	0.010527	0.321342	0.264581	-1.44508	-4.36802	0.00145576	0.00870347	0.00553001	1.05882	0.657292	0.524345	0.680457	0.63737	3.79094	3.86905	4.15269	3.77186	3.4296	3.36182	3.87186	3.39742	3.44469	3.46917	3.34541
627814_at	627814		Vmn2r109	vomeronasal 2, receptor 109	GO:0003674: molecular_function, GO:0004871: signal transducer activity, GO:0004930: G-protein coupled receptor activity, GO:0005575: cellular_component, GO:0005886: plasma membrane, GO:0007165: signal transduction, GO:0007186: G-protein coupled receptor signaling pathway, GO:0008150: biological_process, GO:0016020: membrane, GO:0016021: integral to membrane		-2.74359	0.0139243	0.0348431		1.84171	0.0831729	0.41886		3.3284	0.00427295	0.2572		-1.1251	-0.786965	0.448848	0.842899		1.53085	4.39792	0.0011988	0.13357		-1.75267	-4.70032	0.000877198	0.00610117		-1.01759	-0.303275	0.76727	0.856844		2.6968	2.2428	1.97641	2.20786	2.1703	2.10635	2.17924	1.60397	1.58604	1.35147	1.55238
236690_at	236690	60506	Nyx	nyctalopin	GO:0005576: extracellular region, GO:0005578: proteinaceous extracellular matrix, GO:0005622: intracellular, GO:0007601: visual perception, GO:0050896: response to stimulus		-2.08464	0.0526203	0.0987969		-0.497432	0.625306	0.854929		3.32812	0.00427544	0.2572		-1.34648	-2.79003	0.0184485	0.344965		1.1819	1.79918	0.100826	0.494493		-1.55078	-4.22486	0.00181943	0.0102253		1.0262	0.322013	0.753407	0.84766		2.30884	2.43353	2.32869	1.84787	1.68249	1.91826	2.21446	1.6872	1.82234	1.33059	1.98258
432480_at	432480		Gm1553	predicted gene 1553	GO:0003674: molecular_function, GO:0005575: cellular_component, GO:0008150: biological_process		-2.31848	0.0332465	0.0689437		-1.67942	0.111497	0.466383		3.32409	0.00431191	0.258162		-1.35398	-3.17748	0.00939491	0.280805		1.05423	0.684345	0.508615	0.79165		-1.41272	-4.43742	0.00130792	0.00807632		1.01039	0.084394	0.934241	0.96138		1.37163	1.59091	1.39536	0.924175	1.10725	1.01903	1.01903	0.967223	1.01191	1.01191	0.831727
76000_at	76000		5033430I15Rik	RIKEN cDNA 5033430I15 gene	GO:0003674: molecular_function, GO:0005575: cellular_component, GO:0008150: biological_process		-4.37275	0.000421862	0.00215864	0.00136457	1.88273	0.0771027	0.408514	0.338185	3.31943	0.00435435	0.260085	0.205055	-1.08027	-0.750793	0.469408	0.851306	0.801778	1.44895	4.09902	0.00195014	0.169501	0.122061	-1.84825	-6.80531	5.08124e-05	0.000882127	0.000528236	-1.1808	-1.63522	0.129926	0.279348	0.225867	4.12699	3.94916	4.21205	3.8546	3.89327	3.90416	4.2636	3.37881	3.32143	3.12205	3.00222
625530_at	625530		Dub3	deubiquitinating enzyme 3	GO:0004843: ubiquitin-specific protease activity, GO:0006508: proteolysis, GO:0008233: peptidase activity, GO:0008234: cysteine-type peptidase activity, GO:0016579: protein deubiquitination, GO:0016787: hydrolase activity		0.0564957	0.955611	0.967598		0.677454	0.507305	0.793669		3.31644	0.00438191	0.261112		-1.3124	-2.10877	0.0600982	0.501893		1.42904	2.79643	0.0181445	0.358547		-1.38149	-2.18873	0.0538586	0.117132		1.35757	2.8668	0.0151563	0.0682928		1.69981	1.97844	2.33956	1.83804	1.54413	1.64252	1.50208	1.32292	2.00884	1.64286	1.12067
70594_at	70594		5730460C07Rik	RIKEN cDNA 5730460C07 gene	GO:0003674: molecular_function, GO:0005575: cellular_component, GO:0008150: biological_process		-2.03708	0.0576495	0.106043		-0.698514	0.494375	0.785354		3.30951	0.00444622	0.263079		-1.28926	-2.40572	0.0360498	0.432083		1.13322	1.84677	0.0931945	0.487498		-1.43106	-4.46956	0.00124492	0.00781947		1.02094	0.306409	0.764945	0.85565		3.42779	3.37656	3.2927	3.02401	2.72152	3.2491	2.95735	3.02485	2.69195	2.79109	2.8701
211961_at	211961	80816	Asxl3	additional sex combs like 3 (Drosophila)	GO:0003674: molecular_function, GO:0005575: cellular_component, GO:0005634: nucleus, GO:0006351: transcription, DNA-dependent, GO:0006355: regulation of transcription, DNA-dependent, GO:0008150: biological_process, GO:0046872: metal ion binding		2.54777	0.0208922	0.0478408	0.0373949	-1.78453	0.0923356	0.433855	0.365157	3.30773	0.00446293	0.263449	0.208842	-1.53092	-3.68387	0.00394501	0.23846	0.156891	1.0533	0.619181	0.549027	0.815476	0.793632	-1.02653	-0.218224	0.831711	0.879906	0.868928	1.57084	5.0302	0.000369555	0.00539687	0.00327282	4.18116	4.69002	4.34268	3.76329	3.94139	3.63266	3.86855	4.50941	4.04316	4.33805	4.58245
22031_at	22031	7187	Traf3	TNF receptor-associated factor 3	GO:0001817: regulation of cytokine production, GO:0002224: toll-like receptor signaling pathway, GO:0004842: ubiquitin-protein ligase activity, GO:0005515: protein binding, GO:0005737: cytoplasm, GO:0005768: endosome, GO:0006915: apoptotic process, GO:0007165: signal transduction, GO:0008270: zinc ion binding, GO:0009898: internal side of plasma membrane, GO:0016567: protein ubiquitination, GO:00…	04620: Toll-like receptor signaling pathway, 04622: RIG-I-like receptor signaling pathway, 05160: Hepatitis C, 05200: Pathways in cancer, 05222: Small cell lung cancer	-0.119799	0.906057	0.930533	0.925587	-1.58255	0.132093	0.492984	0.423305	3.30599	0.00447927	0.263529	0.208886	-1.42173	-3.50017	0.00539042	0.255779	0.171846	1.06772	0.760364	0.463809	0.766269	0.740212	-1.26052	-2.55943	0.0287226	0.0743829	0.0570424	1.20428	1.98016	0.0729288	0.192084	0.146668	5.56537	5.35601	5.46947	4.75551	5.11234	4.9249	5.01751	4.85368	5.24789	5.292	5.09531
26410_at	26410	1326	Map3k8	mitogen-activated protein kinase kinase kinase 8	GO:0000166: nucleotide binding, GO:0000186: activation of MAPKK activity, GO:0000287: magnesium ion binding, GO:0004672: protein kinase activity, GO:0004674: protein serine/threonine kinase activity, GO:0004709: MAP kinase kinase kinase activity, GO:0005524: ATP binding, GO:0005737: cytoplasm, GO:0006468: protein phosphorylation, GO:0007049: cell cycle, GO:0007165: signal transduction, GO:0016301…	04010: MAPK signaling pathway, 04620: Toll-like receptor signaling pathway, 04660: T cell receptor signaling pathway	-1.8004	0.0897077	0.150524	0.130771	1.9234	0.071477	0.397884	0.327924	3.30458	0.00449264	0.263529	0.208886	-1.07404	-0.701358	0.498458	0.866948	0.819024	1.51155	4.45964	0.00108581	0.124406	0.083553	-1.53949	-5.20238	0.000420481	0.00360515	0.00220414	1.05455	0.494856	0.63032	0.76124	0.726211	4.51155	4.66271	4.69124	4.27432	4.46263	4.90055	4.36201	4.19711	3.97647	3.84394	3.96569
100126766_at	100126766		Esp3	exocrine gland-secreting peptide 3			-0.946544	0.357235	0.450381		-1.09975	0.286889	0.648597		3.30415	0.00449669	0.263529		-1.29713	-2.56037	0.027547	0.396621		1.08942	1.33942	0.208772	0.596165		-1.28399	-2.94027	0.015013	0.0467066		1.10057	1.21932	0.247918	0.42372		1.07527	1.4226	1.24953	0.798259	0.931543	0.977657	0.807217	0.863301	0.849842	0.827839	1.03161
13107_at	13107	1572	Cyp2f2	cytochrome P450, family 2, subfamily f, polypeptide 2	GO:0004497: monooxygenase activity, GO:0005506: iron ion binding, GO:0005783: endoplasmic reticulum, GO:0009055: electron carrier activity, GO:0009636: response to toxin, GO:0016020: membrane, GO:0016491: oxidoreductase activity, GO:0016705: oxidoreductase activity, acting on paired donors, with incorporation or reduction of molecular oxygen, GO:0016712: oxidoreductase activity, acting on paired …	00980: Metabolism of xenobiotics by cytochrome P450	-6.01548	1.43802e-05	0.000139143	8.38505e-05	-2.63262	0.0175397	0.241852	0.181874	3.30315	0.00450611	0.263529	0.208886	-2.30355	-3.95481	0.00250594	0.209155	0.13717	-1.03445	-0.346526	0.735808	0.903419	0.893802	-4.05044	-8.66375	6.45411e-06	0.000247451	0.000146293	-1.81891	-3.47783	0.0050767	0.0326354	0.0208956	5.94012	5.23348	4.89102	4.02406	3.65303	4.01824	4.87951	3.36261	3.16054	3.3789	3.67043
14347_at	14347	2529	Fut7	fucosyltransferase 7	GO:0002361: CD4-positive, CD25-positive, alpha-beta regulatory T cell differentiation, GO:0002522: leukocyte migration involved in immune response, GO:0005794: Golgi apparatus, GO:0006486: protein glycosylation, GO:0008417: fucosyltransferase activity, GO:0016020: membrane, GO:0016021: integral to membrane, GO:0016740: transferase activity, GO:0016757: transferase activity, transferring glycosyl …	00514: Other types of O-glycan biosynthesis, 00601: Glycosphingolipid biosynthesis - lacto and neolacto series, 01100: Metabolic pathways	-0.134005	0.894985	0.921941		-0.878248	0.392148	0.725574		3.30078	0.00452862	0.264021		-1.59407	-3.51835	0.00522568	0.255779		1.25142	1.44443	0.177859	0.569852		-1.46587	-3.72061	0.00407814	0.0182291		1.36086	1.89404	0.0844726	0.2119		3.16279	3.4715	3.58975	3.15509	2.4551	2.74067	2.52708	2.9981	2.83629	2.59393	3.00323
433586_at	433586	55534	Maml3	mastermind like 3 (Drosophila)	GO:0003713: transcription coactivator activity, GO:0003713: transcription coactivator activity, GO:0005634: nucleus, GO:0005634: nucleus, GO:0007219: Notch signaling pathway, GO:0045944: positive regulation of transcription from RNA polymerase II promoter, GO:0045944: positive regulation of transcription from RNA polymerase II promoter	04330: Notch signaling pathway	-1.0785	0.295992	0.388319	0.364196	-1.46293	0.161873	0.530299	0.460887	3.29598	0.00457464	0.265016	0.209878	-1.77868	-3.28442	0.00780827	0.275285	0.192086	1.12258	1.25019	0.238441	0.618836	0.578001	-1.72804	-3.82817	0.00342392	0.0160974	0.0106167	1.15548	1.2736	0.228745	0.403144	0.346979	4.95375	4.53882	5.1779	3.42819	3.85849	4.62448	4.1583	4.27852	4.11049	3.60781	4.38584
547253_at	547253	54625	Parp14	poly (ADP-ribose) polymerase family, member 14	GO:0000166: nucleotide binding, GO:0003676: nucleic acid binding, GO:0003950: NAD+ ADP-ribosyltransferase activity, GO:0005515: protein binding, GO:0005634: nucleus, GO:0005737: cytoplasm, GO:0005886: plasma membrane, GO:0006351: transcription, DNA-dependent, GO:0006355: regulation of transcription, DNA-dependent, GO:0016740: transferase activity, GO:0016757: transferase activity, transferring gl…		-5.23208	6.9353e-05	0.000500462	0.000305819	3.8679	0.00125052	0.0975867	0.0644103	3.29499	0.00458411	0.265016	0.209878	1.1432	1.0582	0.313898	0.773285	0.69905	2.19218	5.52388	0.000214336	0.0496029	0.0311757	-2.63458	-9.85522	2.04718e-06	0.000129651	7.66865e-05	-1.3739	-2.32116	0.0402266	0.130362	0.0943586	7.5327	7.24287	7.49197	7.26866	7.5508	7.80358	7.79696	6.30119	5.91638	5.8151	6.04257
245583_at	245583	90316	Tgif2lx1	TGFB-induced factor homeobox 2-like, X-linked 1	GO:0003674: molecular_function, GO:0005575: cellular_component, GO:0008150: biological_process		-1.17151	0.257678	0.34718		0.119782	0.906071	0.968756		3.2894	0.00463835	0.266319		-1.32657	-1.96152	0.0771018	0.536358		1.28836	3.02765	0.0121083	0.324194		-1.50973	-3.26944	0.0086092	0.031188		1.13205	1.23916	0.240764	0.416008		1.38522	1.35135	0.694937	0.789651	0.777643	0.943411	0.536981	0.560782	0.588392	0.443113	0.724024
100302594_at	100302594		Snord14e	small nucleolar RNA, C/D box 14E			-0.613083	0.548	0.631908	0.614532	1.35193	0.19425	0.563047	0.497402	3.28765	0.0046555	0.266696	0.211192	-1.11264	-0.953555	0.361925	0.798281	0.731344	1.33067	4.61926	0.00084261	0.109479	0.0730952	-1.30251	-3.15847	0.010376	0.0357585	0.0252863	1.13669	1.44529	0.17592	0.340362	0.285046	9.44638	9.09677	9.28051	8.84154	9.14594	9.392	9.07764	8.99433	8.846	8.92199	8.83304
15953_at	15953		Ifi47	interferon gamma inducible protein 47	GO:0005783: endoplasmic reticulum, GO:0006952: defense response		-5.16641	7.94016e-05	0.000558114	0.000341206	5.26667	6.45955e-05	0.0208743	0.0129488	3.28497	0.00468183	0.267597	0.211739	1.32026	2.73292	0.0203836	0.354827	0.258657	2.45839	6.29578	7.29981e-05	0.0287498	0.0180476	-2.47709	-8.35114	8.90677e-06	0.000301122	0.000178169	-1.33031	-2.39402	0.0353523	0.119529	0.0858269	6.53205	6.27663	6.61866	6.9151	7.02148	6.75909	6.82591	5.25032	5.37188	5.22323	4.78714
258666_at	258666	403282	Olfr822	olfactory receptor 822	GO:0004871: signal transducer activity, GO:0004930: G-protein coupled receptor activity, GO:0004984: olfactory receptor activity, GO:0007165: signal transduction, GO:0007186: G-protein coupled receptor signaling pathway, GO:0007608: sensory perception of smell, GO:0016021: integral to membrane, GO:0050911: detection of chemical stimulus involved in sensory perception of smell	04740: Olfactory transduction	-1.02673	0.319046	0.41177		0.0270829	0.978711	0.993649		3.28226	0.00470852	0.268174		-1.24703	-1.84752	0.0932537	0.565844		1.21578	3.04713	0.0117036	0.322783		-1.36877	-3.52333	0.00563952	0.0229941		1.10764	1.14366	0.276752	0.453741		1.38505	1.44448	1.76616	0.873184	1.37106	1.20211	1.38981	1.08961	0.973878	1.19432	1.08961
382059_at	382059		Defa22	defensin, alpha, 22	GO:0003674: molecular_function, GO:0005576: extracellular region, GO:0005615: extracellular space, GO:0006952: defense response, GO:0042742: defense response to bacterium		-3.32265	0.00406299	0.0133802	0.00933701	1.95115	0.0678516	0.390827	0.321393	3.28179	0.00471321	0.268174	0.21251	-1.14002	-0.862003	0.408103	0.823723	0.763073	2.59002	4.28059	0.00144906	0.14592	0.0999783	-3.5904	-7.28293	2.88432e-05	0.000604394	0.000360487	-1.21598	-0.817353	0.430866	0.601617	0.551892	3.96097	4.16206	4.5766	3.81675	3.16018	4.65603	4.23389	2.26258	2.24254	1.81766	3.04205
78795_at	78795	80210	Armc9	armadillo repeat containing 9	GO:0003674: molecular_function, GO:0005575: cellular_component, GO:0008150: biological_process		2.67909	0.0159281	0.0386519	0.0295408	-0.705047	0.490404	0.782939	0.740217	3.27588	0.00477214	0.270916	0.214515	-1.34123	-2.52695	0.0291986	0.403993	0.297071	1.15801	1.90714	0.0842791	0.478132	0.428281	-1.00652	-0.132897	0.896951	0.926711	0.919505	1.5431	4.12123	0.00165397	0.0151051	0.00935736	4.93982	4.99738	5.06091	4.36605	4.38373	4.47091	4.98992	5.04349	4.94135	4.76395	5.18253
70920_at	70920	219557	4921511H03Rik	RIKEN cDNA 4921511H03 gene	GO:0003674: molecular_function, GO:0005575: cellular_component, GO:0008150: biological_process		-0.404896	0.690643	0.756424		0.145845	0.885772	0.961536		3.26017	0.0049324	0.275058		-1.2177	-1.86212	0.0910234	0.562199		1.21173	2.5398	0.0284302	0.383127		-1.27171	-2.88235	0.0165664	0.0501556		1.16028	1.5947	0.138743	0.291697		0.938623	1.25405	1.23826	0.774741	1.05467	0.866628	0.750128	0.791189	0.723709	0.87219	0.824865
435951_at	435951		Vmn1r122	vomeronasal 1 receptor 122	GO:0003674: molecular_function, GO:0005575: cellular_component, GO:0008150: biological_process		0.712281	0.486028	0.575777		0.237785	0.814912	0.935453		3.25642	0.00497141	0.276098		-1.23871	-1.87244	0.0894761	0.560193		1.24175	2.69251	0.0217659	0.36665		-1.1919	-1.75245	0.110714	0.198104		1.29052	2.76117	0.0183269	0.0774423		1.12011	0.992582	1.43368	0.717843	1.09968	0.840464	0.856514	1.01934	0.925186	1.07359	0.721329
235256_at	235256		Olfr149	olfactory receptor 149	GO:0004871: signal transducer activity, GO:0004930: G-protein coupled receptor activity, GO:0004984: olfactory receptor activity, GO:0005886: plasma membrane, GO:0007165: signal transduction, GO:0007186: G-protein coupled receptor signaling pathway, GO:0007186: G-protein coupled receptor signaling pathway, GO:0007608: sensory perception of smell, GO:0016020: membrane, GO:0016021: integral to memb…	04740: Olfactory transduction	-2.5696	0.0199759	0.0462574		-1.78098	0.0929319	0.435356		3.2554	0.00498205	0.276098		-1.57453	-3.43497	0.0060267	0.263448		1.07154	0.677164	0.512979	0.794277		-1.70559	-4.75769	0.000805021	0.00571484		-1.01092	-0.155171	0.879463	0.927443		2.0665	1.75336	1.37875	1.08318	1.09477	0.902069	1.31083	0.905964	1.05467	0.951689	1.0411
83490_at	83490	118788	Pik3ap1	phosphoinositide-3-kinase adaptor protein 1	GO:0005515: protein binding, GO:0005737: cytoplasm, GO:0005886: plasma membrane, GO:0016020: membrane, GO:0042802: identical protein binding	04662: B cell receptor signaling pathway	-1.03673	0.314496	0.407359	0.383655	3.1887	0.00541841	0.166562	0.117261	3.24686	0.00507227	0.278311	0.220651	1.03791	0.299989	0.770091	0.954744	0.933828	1.5891	5.43017	0.00024566	0.0543166	0.0347058	-1.37095	-3.41504	0.0067497	0.0262146	0.017979	1.11678	1.15825	0.270997	0.448476	0.39292	6.91571	6.7928	7.0599	6.97361	6.68373	7.09314	7.13083	6.73294	6.30649	6.46114	6.34695
76920_at	76920	645432	Arrdc5	arrestin domain containing 5	GO:0003674: molecular_function, GO:0005575: cellular_component, GO:0007165: signal transduction, GO:0008150: biological_process		-2.40249	0.0280848	0.0604273		-0.857599	0.403136	0.732567		3.24594	0.00508213	0.278311		-1.2998	-2.76304	0.0193391	0.351111		1.11815	1.34892	0.2058	0.594112		-1.45005	-4.51657	0.00115851	0.00745316		1.0023	-0.00775812	0.993947	0.996581		3.19484	3.29935	3.13807	2.78929	2.71782	2.84494	2.97192	2.88372	2.59387	2.54398	2.65931
68205_at	68205	81605	Urm1	ubiquitin related modifier 1 homolog (S. cerevisiae)	GO:0002098: tRNA wobble uridine modification, GO:0003674: molecular_function, GO:0005575: cellular_component, GO:0005737: cytoplasm, GO:0008033: tRNA processing, GO:0034227: tRNA thio-modification	04122: Sulfur relay system	-1.87907	0.0776287	0.134021	0.115212	-0.0517421	0.959342	0.986434	0.983052	3.24294	0.00511421	0.278311	0.220901	-1.26228	-2.41611	0.0354052	0.430659	0.321147	1.20803	1.99179	0.0731063	0.462429	0.411797	-1.45538	-3.87081	0.00319586	0.015303	0.0100695	1.04775	0.459762	0.654532	0.778688	0.746126	5.65822	5.78063	5.87136	5.41869	5.29601	5.47246	5.54792	5.16551	5.30988	4.92556	5.4696
269951_at	269951	3418	Idh2	isocitrate dehydrogenase 2 (NADP+), mitochondrial	GO:0000287: magnesium ion binding, GO:0004450: isocitrate dehydrogenase (NADP+) activity, GO:0005739: mitochondrion, GO:0005739: mitochondrion, GO:0005743: mitochondrial inner membrane, GO:0006097: glyoxylate cycle, GO:0006099: tricarboxylic acid cycle, GO:0006102: isocitrate metabolic process, GO:0006950: response to stress, GO:0016491: oxidoreductase activity, GO:0016616: oxidoreductase activit…	00020: Citrate cycle (TCA cycle), 00480: Glutathione metabolism, 01100: Metabolic pathways, 04146: Peroxisome	3.63249	0.00208091	0.00783208	0.00528384	-3.30043	0.00426207	0.153911	0.107706	3.24144	0.00513042	0.278311	0.220901	-1.7552	-4.71027	0.00074266	0.164192	0.101899	-1.0994	-0.931254	0.372689	0.711503	0.680594	1.09336	0.773523	0.457382	0.567508	0.539983	1.74557	5.29417	0.00024432	0.00407766	0.00247004	7.56355	7.48369	7.69314	6.56348	6.47689	7.09884	6.85982	7.60513	7.467	7.65737	8.04925
258486_at	258486	390431	Olfr730	olfactory receptor 730	GO:0004871: signal transducer activity, GO:0004930: G-protein coupled receptor activity, GO:0004984: olfactory receptor activity, GO:0007165: signal transduction, GO:0007186: G-protein coupled receptor signaling pathway, GO:0007608: sensory perception of smell, GO:0016021: integral to membrane, GO:0050911: detection of chemical stimulus involved in sensory perception of smell	04740: Olfactory transduction	-0.287731	0.777058	0.828288		0.325449	0.748844	0.910747		3.24034	0.00514225	0.278311		-1.18536	-1.80943	0.0993121	0.57439		1.21011	2.41826	0.0351403	0.402837		-1.23631	-2.68218	0.0232988	0.0640984		1.16025	1.66427	0.123913	0.270829		1.14962	1.12356	1.17386	0.90165	0.733133	0.921843	1.04203	0.974942	0.868608	0.628135	0.878655
71274_at	71274		4933433G15Rik	RIKEN cDNA 4933433G15 gene	GO:0003674: molecular_function, GO:0005575: cellular_component, GO:0008150: biological_process		-2.29667	0.0347246	0.0713066		-1.05357	0.306939	0.665504		3.23951	0.00515124	0.278311		-1.32744	-2.66799	0.0228309	0.369046		1.09981	1.32729	0.212615	0.598752		-1.44943	-3.93548	0.00287984	0.0142444		1.00725	0.0826328	0.93561	0.961786		1.7395	2.14641	1.85836	1.43398	1.55012	1.62831	1.44423	1.48422	1.29366	1.23927	1.52101
100124348_at	100124348		Traj40	T cell receptor alpha joining 40			-1.88915	0.0761892	0.132021		-1.79253	0.0910016	0.432464		3.23656	0.00518329	0.278311		-1.7366	-3.3025	0.00756848	0.274491		1.08356	0.870712	0.403425	0.731955		-1.829	-6.08777	0.000125416	0.00157904		1.02882	0.408384	0.690734	0.804423		2.46485	2.06948	2.48198	0.811781	1.41502	1.97624	1.763	1.67919	1.4502	1.45901	1.3062
18037_at	18037	4794	Nfkbie	nuclear factor of kappa light polypeptide gene enhancer in B cells inhibitor, epsilon	GO:0005737: cytoplasm, GO:0005794: Golgi apparatus, GO:0042942: D-serine transport, GO:0045892: negative regulation of transcription, DNA-dependent, GO:0048471: perinuclear region of cytoplasm	04660: T cell receptor signaling pathway, 04662: B cell receptor signaling pathway, 04722: Neurotrophin signaling pathway, 04920: Adipocytokine signaling pathway	0.460995	0.650691	0.722302	0.707702	0.915868	0.372645	0.712501	0.661777	3.23599	0.00518949	0.278311	0.222488	-1.26619	-1.5306	0.155671	0.645037	0.54464	1.5649	3.61659	0.00437783	0.236161	0.181399	-1.37137	-2.76256	0.0203151	0.0580266	0.0432712	1.44487	2.38854	0.035698	0.120295	0.0863999	3.79231	3.89951	4.41688	3.18573	3.64543	3.98033	3.94502	3.62277	3.70642	3.47547	3.61501
347722_at	347722	116987	Agap1	ArfGAP with GTPase domain, ankyrin repeat and PH domain 1	GO:0000166: nucleotide binding, GO:0003924: GTPase activity, GO:0005096: GTPase activator activity, GO:0005525: GTP binding, GO:0005543: phospholipid binding, GO:0005622: intracellular, GO:0005737: cytoplasm, GO:0005829: cytosol, GO:0006810: transport, GO:0007264: small GTPase mediated signal transduction, GO:0008060: ARF GTPase activator activity, GO:0008270: zinc ion binding, GO:0015031: protei…	04144: Endocytosis	0.125712	0.901447	0.926818	0.921766	-1.15956	0.262379	0.62665	0.56762	3.23224	0.00523051	0.279776	0.223601	-1.33527	-2.7613	0.0193978	0.351111	0.255672	1.09729	1.22134	0.248733	0.627094	0.588816	-1.21817	-2.40061	0.0376365	0.0902976	0.0710035	1.20277	1.99639	0.0709255	0.189015	0.143947	7.01107	6.71983	6.86895	6.22043	6.54242	6.58397	6.44394	6.55193	6.65892	6.66966	6.45628
16532_at	16532	157855	Kcnu1	potassium channel, subfamily U, member 1	GO:0000166: nucleotide binding, GO:0005216: ion channel activity, GO:0005244: voltage-gated ion channel activity, GO:0005249: voltage-gated potassium channel activity, GO:0005267: potassium channel activity, GO:0006810: transport, GO:0006811: ion transport, GO:0006813: potassium ion transport, GO:0008076: voltage-gated potassium channel complex, GO:0015269: calcium-activated potassium channel act…	04270: Vascular smooth muscle contraction	-3.43154	0.00321285	0.0111271		-0.587684	0.56453	0.824232		3.2312	0.00524196	0.279776		-1.33288	-2.32912	0.0411642	0.449695		1.1688	2.185	0.0526037	0.431617		-1.73086	-5.98874	0.000142822	0.00172909		-1.11104	-0.865575	0.404983	0.579145		2.69702	2.69795	3.01571	2.05388	2.39601	2.74667	2.30474	2.21119	2.04192	1.90621	1.89808
100217455_at	100217455		Snord49a	small nucleolar RNA, C/D box 49A	GO:0003674: molecular_function, GO:0005575: cellular_component, GO:0008150: biological_process		-1.08893	0.2915	0.383584	0.359593	0.458258	0.652616	0.869258	0.836383	3.22928	0.00526309	0.279877	0.223704	-1.24135	-1.64781	0.129207	0.616235	0.510429	1.32315	3.57845	0.00467199	0.242052	0.187099	-1.46974	-3.98193	0.00267325	0.0135359	0.00881613	1.11754	1.08377	0.301372	0.478845	0.424152	10.6996	10.3082	10.6583	10.0087	9.89223	10.6265	10.3691	10.2154	9.97497	9.84905	9.97641
105663_at	105663	79178	Thtpa	thiamine triphosphatase	GO:0005634: nucleus, GO:0005730: nucleolus, GO:0005737: cytoplasm, GO:0006772: thiamine metabolic process, GO:0006796: phosphate-containing compound metabolic process, GO:0016311: dephosphorylation, GO:0016787: hydrolase activity, GO:0046872: metal ion binding, GO:0050333: thiamin-triphosphatase activity	00730: Thiamine metabolism, 01100: Metabolic pathways	-1.60887	0.1262	0.196662	0.175155	-2.49458	0.0232953	0.268871	0.205281	3.2239	0.00532298	0.281872	0.22496	-1.38877	-3.46107	0.00576316	0.261816	0.176213	-1.00406	-0.105818	0.917726	0.973048	0.970587	-1.31605	-3.7899	0.00364312	0.0167938	0.0111175	1.05099	0.571646	0.578916	0.722458	0.684438	4.59026	4.47954	4.39527	4.04083	4.0518	3.87766	4.08786	4.10195	4.10741	4.1163	4.05087
22329_at	22329	7412	Vcam1	vascular cell adhesion molecule 1	GO:0002102: podosome, GO:0005178: integrin binding, GO:0005615: extracellular space, GO:0005886: plasma membrane, GO:0005902: microvillus, GO:0007155: cell adhesion, GO:0007155: cell adhesion, GO:0007157: heterophilic cell-cell adhesion, GO:0007157: heterophilic cell-cell adhesion, GO:0007159: leukocyte cell-cell adhesion, GO:0007159: leukocyte cell-cell adhesion, GO:0007507: heart development, G…	04514: Cell adhesion molecules (CAMs), 04670: Leukocyte transendothelial migration, 05143: African trypanosomiasis, 05144: Malaria	-1.19076	0.250237	0.33893	0.315326	2.12136	0.0490143	0.349143	0.280076	3.22155	0.00534927	0.28267	0.225429	-1.09858	-0.846909	0.416091	0.827752	0.768408	2.23261	3.7222	0.00365934	0.218331	0.166488	-1.91052	-4.97206	0.000586537	0.00456586	0.0028103	1.28379	1.0206	0.329103	0.506929	0.452826	5.59066	5.69533	5.49089	5.48176	4.98189	5.44871	5.80723	5.1649	4.63482	4.40183	4.27202
258842_at	258842		Olfr1098	olfactory receptor 1098	GO:0004871: signal transducer activity, GO:0004930: G-protein coupled receptor activity, GO:0004984: olfactory receptor activity, GO:0007165: signal transduction, GO:0007186: G-protein coupled receptor signaling pathway, GO:0007608: sensory perception of smell, GO:0016021: integral to membrane, GO:0050911: detection of chemical stimulus involved in sensory perception of smell	04740: Olfactory transduction	-0.307373	0.762323	0.815928		-1.6447	0.118539	0.473549		3.21818	0.00538728	0.283624		-1.34538	-3.02467	0.0122515	0.310141		1.04935	0.69555	0.50185	0.787208		-1.22921	-2.54254	0.0295614	0.0758165		1.14853	1.65776	0.125237	0.272909		1.31032	1.19273	1.10402	0.868993	0.609674	0.882428	0.729116	0.788204	0.792208	0.984617	1.04523
83673_at	83673		Snhg1	small nucleolar RNA host gene (non-protein coding) 1			4.4006	0.000397476	0.00205261	0.00129557	-2.44629	0.0257017	0.277635	0.212635	3.21597	0.00541232	0.283624	0.226159	-1.465	-3.34463	0.0070385	0.273155	0.188464	-1.00449	-0.0810308	0.936945	0.980676	0.97864	1.12187	1.46685	0.173614	0.275165	0.245515	1.63619	5.37956	0.000214159	0.00373829	0.00226109	8.02672	7.74887	8.09242	7.374	7.227	7.70786	7.2924	8.14004	8.12667	8.1822	8.06636
434510_at	434510		Gm5627	predicted gene 5627			-1.7683	0.0950911	0.157667	0.137537	-0.854699	0.404695	0.733481	0.685785	3.20882	0.00549412	0.285536	0.227019	-1.29141	-2.51758	0.029679	0.405248	0.298575	1.10742	1.44501	0.177699	0.569768	0.526189	-1.37118	-3.41615	0.00673714	0.026182	0.0179552	1.04299	0.535619	0.602754	0.741412	0.70398	3.91951	3.94756	4.2395	3.56778	3.69542	3.76166	3.66437	3.8097	3.44395	3.53491	3.53466
100861675_at	100861675		LOC100861675	uncharacterized LOC100861675			-3.38226	0.00357322	0.0120889	0.00836911	-1.19023	0.250438	0.616639	0.556971	3.20494	0.00553909	0.286182	0.228138	-1.42831	-2.87528	0.0158969	0.335592	0.241846	1.11528	1.29206	0.224113	0.608527	0.566836	-1.74537	-5.46899	0.00028876	0.00277844	0.00168995	-1.09568	-0.880035	0.397433	0.572145	0.520989	5.68144	5.21935	5.68925	4.93226	5.32279	4.961	4.8654	4.79565	4.87515	4.58171	4.70125
666049_at	666049		Gm13080	predicted gene 13080			1.46995	0.159983	0.23817		-0.520382	0.609561	0.847327		3.20407	0.00554918	0.286182		-1.36898	-2.66919	0.0227833	0.369046		1.19494	1.82045	0.0973468	0.491183		-1.12596	-1.22919	0.247566	0.358939		1.45284	3.36435	0.00621137	0.0372771		2.71543	2.68074	2.5287	2.1317	1.79185	2.47275	2.28275	2.75389	2.11101	2.47464	2.48024
329716_at	329716		BC107364	cDNA sequence BC107364	GO:0003674: molecular_function, GO:0005575: cellular_component, GO:0008150: biological_process		-3.25368	0.00471294	0.0149879		1.02372	0.320425	0.673172		3.20009	0.00559583	0.287854		-1.15609	-1.22574	0.247301	0.727897		1.31562	3.60571	0.00445975	0.236161		-1.63247	-5.04895	0.000524409	0.00421769		-1.0733	-0.765906	0.459658	0.62665		2.33428	1.96173	2.4287	1.98063	1.85226	2.11768	2.20814	1.65596	1.50441	1.61467	1.4044
26569_at	26569	10999	Slc27a4	solute carrier family 27 (fatty acid transporter), member 4	GO:0000038: very long-chain fatty acid metabolic process, GO:0000038: very long-chain fatty acid metabolic process, GO:0000166: nucleotide binding, GO:0001579: medium-chain fatty acid transport, GO:0001579: medium-chain fatty acid transport, GO:0001676: long-chain fatty acid metabolic process, GO:0001676: long-chain fatty acid metabolic process, GO:0001676: long-chain fatty acid metabolic process…	03320: PPAR signaling pathway, 04975: Fat digestion and absorption	-1.62613	0.122457	0.192297	0.170771	-0.559134	0.583419	0.833805	0.796616	3.198	0.00562036	0.288527	0.230191	-1.25361	-2.23876	0.048106	0.468992	0.356165	1.12626	1.74916	0.109458	0.502602	0.453799	-1.3442	-3.34074	0.00764033	0.0285784	0.0197833	1.05036	0.633441	0.539236	0.692374	0.650328	5.34454	5.3759	5.07738	5.07761	4.92335	4.85301	4.92022	4.73368	5.0085	4.71435	4.90381
56386_at	56386	9331	B4galt6	UDP-Gal:betaGlcNAc beta 1,4-galactosyltransferase, polypeptide 6	GO:0005575: cellular_component, GO:0005794: Golgi apparatus, GO:0005975: carbohydrate metabolic process, GO:0008378: galactosyltransferase activity, GO:0008489: UDP-galactose:glucosylceramide beta-1,4-galactosyltransferase activity, GO:0016020: membrane, GO:0016021: integral to membrane, GO:0016740: transferase activity, GO:0016757: transferase activity, transferring glycosyl groups, GO:0030148: …	00600: Sphingolipid metabolism, 01100: Metabolic pathways	6.93899	2.49768e-06	3.61819e-05	2.16544e-05	-2.03171	0.0582447	0.369059	0.299689	3.19693	0.00563295	0.288586	0.230191	-1.84723	-4.943	0.000518773	0.143525	0.0893202	1.06012	0.295986	0.773026	0.919324	0.911169	1.68835	4.03861	0.00244201	0.0127045	0.0082404	3.30629	8.55151	3.16698e-06	0.000275265	0.00016369	5.80127	6.21727	5.62806	4.79327	5.09197	4.98715	5.17394	6.80032	6.38267	6.40974	6.95927
212167_at	212167	54103	Pion	pigeon homolog (Drosophila)	GO:0001540: beta-amyloid binding, GO:0005794: Golgi apparatus, GO:0005802: trans-Golgi network, GO:0030162: regulation of proteolysis, GO:0034205: beta-amyloid formation, GO:0034205: beta-amyloid formation		-1.74176	0.0997546	0.163582	0.143207	1.71779	0.104136	0.456908	0.38806	3.19386	0.00566942	0.289593	0.230662	-1.09187	-0.755983	0.466422	0.849531	0.799783	1.56444	5.28438	0.000304484	0.0619654	0.0393667	-1.63717	-5.25944	0.000387655	0.00340817	0.00208275	1.04336	0.511491	0.618996	0.753194	0.716798	6.02697	6.16403	6.29477	5.39946	6.03117	6.14228	6.40637	5.45022	5.32701	5.27955	5.72081
241547_at	241547	283254	Harbi1	harbinger transposase derived 1	GO:0003674: molecular_function, GO:0004518: nuclease activity, GO:0005634: nucleus, GO:0005737: cytoplasm, GO:0005813: centrosome, GO:0008150: biological_process, GO:0008152: metabolic process, GO:0016787: hydrolase activity, GO:0046872: metal ion binding, GO:0090305: nucleic acid phosphodiester bond hydrolysis		-2.71648	0.0147351	0.0363347	0.0276195	-0.475946	0.640219	0.862591	0.828854	3.19334	0.00567558	0.289593	0.230662	-1.25078	-2.40263	0.0362436	0.433202	0.324628	1.13397	1.62209	0.134465	0.529344	0.479914	-1.44959	-4.16028	0.00201383	0.0110445	0.0071042	-1.02203	-0.300373	0.769426	0.858334	0.835492	5.02273	5.04784	5.22493	4.77989	4.82118	4.73473	4.77698	4.82108	4.47242	4.40381	4.52932
14183_at	14183	2263	Fgfr2	fibroblast growth factor receptor 2	GO:0000122: negative regulation of transcription from RNA polymerase II promoter, GO:0000166: nucleotide binding, GO:0001525: angiogenesis, GO:0001657: ureteric bud development, GO:0001701: in utero embryonic development, GO:0001701: in utero embryonic development, GO:0001837: epithelial to mesenchymal transition, GO:0002053: positive regulation of mesenchymal cell proliferation, GO:0003148: outf…	04010: MAPK signaling pathway, 04144: Endocytosis, 04810: Regulation of actin cytoskeleton, 05200: Pathways in cancer, 05215: Prostate cancer	0.486548	0.63284	0.707002	0.691583	-2.63714	0.0173763	0.241792	0.181874	3.19151	0.00569743	0.29012	0.230917	-1.87942	-4.02345	0.00223687	0.199232	0.130637	-1.03306	-0.337984	0.742052	0.906604	0.896627	-1.31964	-3.0692	0.0120647	0.0398877	0.0285846	1.37861	2.27336	0.0437704	0.138048	0.100728	7.4068	7.36934	7.48962	6.03029	6.00394	6.91539	6.84486	7.22995	6.91936	6.76128	7.13407
13088_at	13088	1555	Cyp2b10	cytochrome P450, family 2, subfamily b, polypeptide 10	GO:0004497: monooxygenase activity, GO:0008202: steroid metabolic process, GO:0008395: steroid hydroxylase activity, GO:0016491: oxidoreductase activity, GO:0017144: drug metabolic process, GO:0042180: cellular ketone metabolic process, GO:0042738: exogenous drug catabolic process, GO:0046872: metal ion binding, GO:0055114: oxidation-reduction process	00590: Arachidonic acid metabolism, 00830: Retinol metabolism, 00980: Metabolism of xenobiotics by cytochrome P450, 00982: Drug metabolism - cytochrome P450, 01100: Metabolic pathways	-0.279623	0.783167	0.833179		1.24259	0.231016	0.599689		3.18941	0.00572258	0.290813		-1.21095	-1.45196	0.175974	0.665339		1.65058	3.3158	0.00733717	0.284397		-1.49224	-3.69878	0.00422617	0.0187247		1.33944	1.72917	0.111363	0.252898		2.04543	1.54035	1.8416	1.32166	1.29692	1.95308	1.51878	1.45801	1.10829	1.33926	1.04005
208211_at	208211	56052	Alg1	asparagine-linked glycosylation 1 (beta-1,4-mannosyltransferase)	GO:0003674: molecular_function, GO:0004578: chitobiosyldiphosphodolichol beta-mannosyltransferase activity, GO:0005575: cellular_component, GO:0005783: endoplasmic reticulum, GO:0008150: biological_process, GO:0008152: metabolic process, GO:0016020: membrane, GO:0016021: integral to membrane, GO:0016740: transferase activity, GO:0016757: transferase activity, transferring glycosyl groups	00510: N-Glycan biosynthesis, 01100: Metabolic pathways	-1.71121	0.105369	0.171013	0.150325	-1.00905	0.327209	0.678333	0.623628	3.18414	0.00578622	0.292279	0.233241	-1.25175	-2.28654	0.0443054	0.457303	0.346548	1.08496	1.40161	0.18996	0.579602	0.537579	-1.3097	-3.72141	0.00407281	0.0182181	0.0121212	1.03695	0.478806	0.641339	0.769204	0.735551	5.16783	5.23954	5.36604	4.74921	4.98026	4.93011	5.06683	4.8755	4.83832	4.88993	4.87937
226777_at	226777	79762	C130074G19Rik	RIKEN cDNA C130074G19 gene	GO:0003674: molecular_function, GO:0005575: cellular_component, GO:0008150: biological_process, GO:0016020: membrane, GO:0016021: integral to membrane		-5.20308	7.36184e-05	0.000525078	0.000320721	-0.393714	0.698725	0.889947	0.861873	3.18063	0.00582901	0.292464	0.233696	-1.29915	-2.65188	0.0234822	0.374066	0.273025	1.18944	1.6908	0.120372	0.515006	0.465533	-1.9399	-8.05858	1.21441e-05	0.000368164	0.000218242	-1.25539	-2.23283	0.0470087	0.144324	0.106057	5.75536	5.6216	5.54221	5.32297	5.28026	5.06896	5.36933	4.74812	4.60122	4.54135	4.83614
83702_at	83702	1109	Akr1c6	aldo-keto reductase family 1, member C6	GO:0004032: alditol:NADP+ 1-oxidoreductase activity, GO:0004303: estradiol 17-beta-dehydrogenase activity, GO:0005829: cytosol, GO:0006694: steroid biosynthetic process, GO:0007586: digestion, GO:0008202: steroid metabolic process, GO:0008206: bile acid metabolic process, GO:0008610: lipid biosynthetic process, GO:0016491: oxidoreductase activity, GO:0016655: oxidoreductase activity, acting on NA…	00051: Fructose and mannose metabolism, 00591: Linoleic acid metabolism, 00650: Butanoate metabolism, 01100: Metabolic pathways	-1.30222	0.210343	0.295403		0.567358	0.577945	0.83132		3.18003	0.00583628	0.292464		-1.27434	-1.57748	0.144562	0.633982		1.42919	4.02764	0.00219423	0.178438		-1.65144	-4.47044	0.00124324	0.00781281		1.10284	0.900813	0.386753	0.562424		2.11867	2.71431	2.33253	1.74361	2.65477	1.90061	1.72283	1.5039	1.76972	1.86212	1.58032
100861903_at	100861903		LOC100861903	uncharacterized LOC100861903			-1.70485	0.106571	0.172437		-0.586395	0.565376	0.824693		3.17537	0.00589358	0.293768		-1.24746	-2.2235	0.0493847	0.473845		1.12429	1.72177	0.114463	0.508101		-1.3451	-3.67817	0.00437106	0.0191745		1.04268	0.517128	0.615182	0.750364		1.10198	0.887026	1.06921	0.541268	0.86023	0.743979	0.649188	0.429991	0.580221	0.676565	0.678262
634104_at	634104	121275	Olfr287	olfactory receptor 287	GO:0004871: signal transducer activity, GO:0004930: G-protein coupled receptor activity, GO:0004984: olfactory receptor activity, GO:0007165: signal transduction, GO:0007186: G-protein coupled receptor signaling pathway, GO:0007608: sensory perception of smell, GO:0016021: integral to membrane, GO:0050911: detection of chemical stimulus involved in sensory perception of smell	04740: Olfactory transduction	-3.00437	0.00803273	0.022737	0.016552	-2.78879	0.012667	0.219482	0.161293	3.17488	0.00589972	0.293768	0.235703	-1.72421	-3.81413	0.00316841	0.220853	0.144327	-1.04371	-0.574762	0.577588	0.828976	0.809059	-1.78945	-5.52737	0.000266307	0.00262824	0.00159935	-1.0832	-0.552262	0.591679	0.733193	0.695591	3.72687	4.21688	4.22687	3.60929	2.84292	3.40764	3.18709	3.23669	3.17358	3.10152	3.41153
258420_at	258420	390445	Olfr221	olfactory receptor 221	GO:0004871: signal transducer activity, GO:0004930: G-protein coupled receptor activity, GO:0004984: olfactory receptor activity, GO:0007165: signal transduction, GO:0007186: G-protein coupled receptor signaling pathway, GO:0007608: sensory perception of smell, GO:0016021: integral to membrane, GO:0050911: detection of chemical stimulus involved in sensory perception of smell	04740: Olfactory transduction	-0.308829	0.761233	0.815073		1.71007	0.105582	0.458363		3.17457	0.00590354	0.293768		-1.08585	-0.721231	0.486649	0.860928		1.41692	4.70045	0.000741657	0.102715		-1.30235	-3.05434	0.0123721	0.0406057		1.18138	1.6365	0.129655	0.279045		2.22957	2.46987	2.60202	2.53122	2.15727	2.01718	2.51784	2.05992	2.16544	2.05498	1.95529
319616_at	319616		5930412G12Rik	RIKEN cDNA 5930412G12 gene	GO:0003674: molecular_function, GO:0005575: cellular_component, GO:0008150: biological_process		-3.63807	0.00205594	0.0077601	0.00523028	-2.08102	0.0529887	0.358365	0.288289	3.17398	0.00591086	0.293768	0.235703	-1.8993	-3.50474	0.00534851	0.255779	0.171827	1.04505	0.407883	0.691572	0.884143	0.870864	-2.4395	-6.94726	4.28208e-05	0.000785709	0.00047027	-1.22905	-1.10926	0.290696	0.468077	0.413163	4.18229	3.68448	4.46297	3.27717	2.57391	3.032	3.74682	2.95105	3.02694	2.67159	2.75456
14776_at	14776	2877	Gpx2	glutathione peroxidase 2	GO:0001659: temperature homeostasis, GO:0002862: negative regulation of inflammatory response to antigenic stimulus, GO:0004601: peroxidase activity, GO:0004602: glutathione peroxidase activity, GO:0004602: glutathione peroxidase activity, GO:0004602: glutathione peroxidase activity, GO:0005634: nucleus, GO:0005737: cytoplasm, GO:0005829: cytosol, GO:0006979: response to oxidative stress, GO:0009…	00480: Glutathione metabolism, 00590: Arachidonic acid metabolism	0.156435	0.877547	0.908732		-0.135778	0.893604	0.964394		3.17252	0.00592895	0.293768		-1.42755	-2.38186	0.0375722	0.438462		1.29959	2.32733	0.0411498	0.412343		-1.3751	-2.23255	0.0500255	0.111067		1.34916	2.53295	0.0275965	0.101443		2.34202	2.76621	2.0803	1.95407	2.29399	1.58388	1.7062	2.38497	1.9492	1.76772	1.64296
100306944_at	100306944		Snora73a	small nucleolar RNA, H/ACA box 73a	GO:0003674: molecular_function, GO:0005575: cellular_component, GO:0008150: biological_process		-3.65615	0.00197708	0.0074984	0.00504525	1.33556	0.199436	0.56767	0.503345	3.16758	0.00599068	0.294924	0.236345	-1.1456	-1.04703	0.318785	0.773983	0.701334	1.49818	4.36488	0.00126429	0.136187	0.0923866	-1.99545	-7.53731	2.15635e-05	0.000508923	0.000303485	-1.16263	-1.03631	0.322033	0.500103	0.445661	10.3965	9.98831	10.1265	9.43058	10.004	10.2929	10.0775	9.26524	9.30195	9.05695	9.09568
76113_at	76113	4025	Lpo	lactoperoxidase	GO:0003674: molecular_function, GO:0004601: peroxidase activity, GO:0005575: cellular_component, GO:0008150: biological_process	04970: Salivary secretion	-5.47855	4.19268e-05	0.000331287	0.000201211	1.37496	0.187135	0.555915	0.489502	3.16616	0.00600854	0.295227	0.236421	-1.18717	-1.02986	0.326411	0.778939	0.707132	1.53722	4.45921	0.00108656	0.124406	0.083553	-2.61583	-7.17756	3.26065e-05	0.000658778	0.000393691	-1.43338	-3.01586	0.0115928	0.0569052	0.0376626	4.61793	5.42734	4.87526	5.0078	4.65657	4.92966	4.39226	3.57823	3.72576	3.38051	3.78883
627264_at	627264		Gm14347	predicted gene 14347	GO:0003674: molecular_function, GO:0005575: cellular_component, GO:0008150: biological_process		-2.64529	0.0170855	0.040896		0.153158	0.880091	0.959912		3.15814	0.00611048	0.298027		-1.23783	-2.08975	0.0620752	0.506201		1.22887	2.22211	0.0493522	0.423628		-1.55423	-4.60933	0.00100614	0.00674306		-1.02176	-0.251281	0.806173	0.882843		1.7399	1.89853	2.00745	1.55224	1.56388	1.40677	1.76729	1.16613	0.975362	1.38983	1.42354
100043051_at	100043051		Vmn1r149	vomeronasal 1 receptor 149	GO:0003674: molecular_function, GO:0005575: cellular_component, GO:0008150: biological_process		-1.43205	0.170401	0.250547		0.0201934	0.984126	0.995461		3.15778	0.00611507	0.298027		-1.23713	-1.85938	0.0914385	0.563107		1.21113	2.60211	0.0254968	0.378564		-1.39744	-3.98173	0.00267408	0.0135374		1.07219	0.726847	0.482319	0.646563		1.57883	1.72796	1.34225	1.48676	1.25337	1.24253	0.977985	1.11164	1.06574	1.03656	1.08714
66408_at	66408	54840	Aptx	aprataxin	GO:0000012: single strand break repair, GO:0000012: single strand break repair, GO:0000785: chromatin, GO:0003677: DNA binding, GO:0003682: chromatin binding, GO:0003684: damaged DNA binding, GO:0003690: double-stranded DNA binding, GO:0003725: double-stranded RNA binding, GO:0003824: catalytic activity, GO:0005622: intracellular, GO:0005634: nucleus, GO:0005654: nucleoplasm, GO:0005654: nucleopl…		0.421867	0.67845	0.745662	0.732043	-1.2792	0.218144	0.58697	0.523489	3.15256	0.00618237	0.299624	0.240249	-1.3898	-2.83511	0.0170518	0.338911	0.244866	1.08636	1.13688	0.280926	0.653193	0.614492	-1.21071	-1.89674	0.0875472	0.166708	0.140778	1.24706	2.47354	0.0306854	0.10906	0.0772683	5.13027	5.49772	5.13119	4.88637	4.97321	4.74072	4.51397	5.18411	4.73935	5.01984	4.97347
69269_at	69269	79005	Scnm1-ps	sodium channel modifier 1, pseudogene			-1.90947	0.0733619	0.128129	0.109769	-1.0953	0.288778	0.650431	0.594016	3.15173	0.00619313	0.299624	0.240249	-1.34008	-2.49176	0.0310432	0.411829	0.304359	1.09543	1.42831	0.182334	0.574345	0.530238	-1.42175	-3.40083	0.00691126	0.0266654	0.0183336	1.03251	0.413515	0.68708	0.801933	0.771723	6.64953	6.21755	6.76019	6.17831	6.05956	6.07999	6.22914	5.98929	6.07149	6.17713	5.96482
100861755_at	100861755		LOC100861755	disks large homolog 5-like			-2.17323	0.044305	0.0862289	0.0710738	-0.70475	0.490584	0.782939	0.740217	3.14959	0.00622093	0.300306	0.240249	-1.46435	-2.75581	0.0195847	0.351275	0.255846	1.19456	1.7398	0.111145	0.504577	0.455837	-1.74274	-4.54671	0.00110648	0.00719446	0.00451417	1.00374	0.164864	0.872006	0.922203	0.908955	5.75067	5.69612	6.11723	5.41324	4.97595	5.02483	5.7224	5.44883	5.08811	4.85172	4.77616
106618_at	106618	197335	Wdr90	WD repeat domain 90	GO:0003674: molecular_function, GO:0005575: cellular_component, GO:0008150: biological_process		2.26639	0.0368781	0.0746816	0.0608517	-2.82892	0.0116431	0.212509	0.1549	3.1479	0.00624298	0.300306	0.240249	-1.5257	-3.68172	0.00395938	0.238756	0.157041	-1.03463	-0.553427	0.591587	0.835498	0.816807	-1.04031	-0.481725	0.640529	0.728507	0.707385	1.4175	3.49816	0.00489698	0.0318115	0.0203566	4.67755	4.47952	4.41043	3.58829	4.0343	4.14524	3.84163	4.41986	4.47368	4.49063	4.49457
11735_at	11735	288	Ank3	ankyrin 3, epithelial	GO:0000281: cytokinesis after mitosis, GO:0005200: structural constituent of cytoskeleton, GO:0005515: protein binding, GO:0005622: intracellular, GO:0005886: plasma membrane, GO:0007009: plasma membrane organization, GO:0007411: axon guidance, GO:0010650: positive regulation of cell communication by electrical coupling, GO:0014704: intercalated disc, GO:0016020: membrane, GO:0016323: basolateral…		2.53003	0.0216662	0.0492398	0.0385784	-4.70781	0.000206933	0.0407496	0.0257911	3.14492	0.00628216	0.300558	0.240249	-1.81293	-5.79824	0.000148302	0.0983708	0.0593122	-1.21517	-2.12495	0.0583039	0.439739	0.38871	-1.01007	-0.171002	0.867685	0.905926	0.897263	1.47704	4.30491	0.0012111	0.0121828	0.00749263	6.79155	6.55879	6.67092	5.60868	5.77978	5.99321	5.86572	6.68001	6.3567	6.65743	6.90388
20361_at	20361	8482	Sema7a	sema domain, immunoglobulin domain (Ig), and GPI membrane anchor, (semaphorin) 7A	GO:0004872: receptor activity, GO:0005178: integrin binding, GO:0005886: plasma membrane, GO:0006954: inflammatory response, GO:0007229: integrin-mediated signaling pathway, GO:0007229: integrin-mediated signaling pathway, GO:0007275: multicellular organismal development, GO:0007399: nervous system development, GO:0009897: external side of plasma membrane, GO:0016020: membrane, GO:0030154: cell d…	04360: Axon guidance	7.25145	1.41819e-06	2.31522e-05	1.38132e-05	-1.69126	0.109178	0.462832	0.394052	3.14478	0.00628397	0.300558	0.240249	-1.44722	-3.25547	0.00820864	0.277415	0.195479	1.06637	0.674106	0.514845	0.795658	0.772294	1.47803	5.43691	0.000301954	0.00286561	0.00174423	2.281	7.14353	1.76282e-05	0.000766099	0.000456365	4.38867	4.38327	4.35756	3.99757	3.47746	4.08184	3.74057	4.8508	4.91216	5.04053	4.95086
723954_at	723954		Mir133a-2	microRNA 133a-2	GO:0010629: negative regulation of gene expression, GO:0035195: gene silencing by miRNA, GO:0045668: negative regulation of osteoblast differentiation, GO:0060043: regulation of cardiac muscle cell proliferation, GO:0070482: response to oxygen levels		-1.76431	0.0957813	0.158593		-0.66698	0.513807	0.797869		3.14383	0.00629651	0.300587		-1.4592	-2.62607	0.0245645	0.382441		1.20873	1.89038	0.0866719	0.479499		-1.67704	-4.51403	0.00116303	0.00747457		1.05171	0.511378	0.619072	0.753204		2.86282	2.62246	3.07609	2.55119	1.7144	2.46446	2.41076	2.31958	2.33103	1.82985	1.92817
100316736_at	100316736		Mir599	microRNA 599			-1.65458	0.116497	0.185054		-0.144396	0.886899	0.962059		3.13889	0.00636201	0.30141		-1.22807	-1.8976	0.0858061	0.553515		1.17272	2.36617	0.03847	0.409074		-1.37632	-3.8809	0.00314424	0.015119		1.04639	0.542838	0.597937	0.737683		1.20983	1.36149	1.52076	0.813908	1.26698	1.04304	1.13185	0.861074	0.828365	1.03711	0.899722
68484_at	68484		Krtap6-5	keratin associated protein 6-5	GO:0003674: molecular_function, GO:0005575: cellular_component, GO:0005882: intermediate filament, GO:0008150: biological_process		-2.41975	0.0271217	0.0587707		-0.609807	0.550117	0.816479		3.13835	0.00636917	0.30141		-1.27945	-2.24638	0.0474794	0.466938		1.13929	1.81203	0.0987105	0.491719		-1.46616	-4.50965	0.00117084	0.00750753		-1.00583	-0.0601194	0.953126	0.972336		1.07429	1.36628	0.986849	0.617102	0.992207	0.77233	0.77843	0.617304	0.586474	0.549188	0.644218
100271704_at	100271704		Gm17660	predicted gene, 17660			-2.17738	0.0439471	0.0856913		-1.38339	0.184584	0.55333		3.13742	0.00638158	0.30141		-1.30907	-2.58025	0.0266083	0.392031		1.06598	1.02414	0.328841	0.68215		-1.38381	-4.09467	0.00223391	0.0118943		1.0084	0.127265	0.900999	0.940316		1.61131	1.45611	1.28515	0.971945	0.971367	1.27145	1.03737	0.958714	0.992726	1.00866	0.992813
76974_at	76974		1190003J15Rik	RIKEN cDNA 1190003J15 gene	GO:0005739: mitochondrion, GO:0005777: peroxisome, GO:0006144: purine nucleobase metabolic process, GO:0006810: transport, GO:0016787: hydrolase activity, GO:0033971: hydroxyisourate hydrolase activity	00230: Purine metabolism, 01100: Metabolic pathways	-6.90624	2.65241e-06	3.77935e-05	2.26126e-05	6.27733	8.65185e-06	0.00703823	0.00414207	3.13586	0.0064025	0.30141	0.24217	1.79042	3.59566	0.00458103	0.246418	0.162625	3.7847	7.76081	1.1671e-05	0.013333	0.00845655	-4.31991	-9.58439	2.6303e-06	0.000151024	8.92859e-05	-2.0436	-4.24315	0.00134427	0.013127	0.00808196	6.84584	6.56475	6.61443	8.09686	7.32981	7.16615	7.28729	4.43525	5.17795	4.32201	4.09814
723927_at	723927		Mir299	microRNA 299			-2.52899	0.0217128	0.0493191		-1.30365	0.209868	0.578582		3.13424	0.00642429	0.30141		-1.58059	-2.88221	0.0157056	0.334072		1.11162	1.32613	0.212986	0.598964		-1.80392	-3.96179	0.00276083	0.0138184		-1.0267	-0.207762	0.839165	0.902813		2.04604	2.07938	1.27291	1.08048	1.38968	1.30463	0.912349	1.07477	1.14418	0.660556	1.0461
16518_at	16518	3759	Kcnj2	potassium inwardly-rectifying channel, subfamily J, member 2	GO:0005216: ion channel activity, GO:0005242: inward rectifier potassium channel activity, GO:0005244: voltage-gated ion channel activity, GO:0005515: protein binding, GO:0006810: transport, GO:0006811: ion transport, GO:0006813: potassium ion transport, GO:0015693: magnesium ion transport, GO:0016020: membrane, GO:0016021: integral to membrane, GO:0030425: dendrite, GO:0034765: regulation of ion…	04971: Gastric acid secretion	2.95929	0.00883985	0.0244746		0.28255	0.78096	0.924563		3.13133	0.00646347	0.30141		-1.30401	-2.73596	0.0202758	0.354075		1.38545	2.07924	0.063032	0.446664		1.02521	0.327619	0.750059	0.817839		1.85218	4.00261	0.00202714	0.0173737		2.38215	2.52627	2.39214	1.97648	2.02726	1.9446	2.24098	2.59217	2.43311	2.46305	2.38732
67654_at	67654		4930558C23Rik	RIKEN cDNA 4930558C23 gene			-0.0897724	0.929525	0.947915		-0.0485319	0.961862	0.987444		3.13093	0.00646893	0.30141		-1.24517	-2.03232	0.0684279	0.522032		1.19882	2.15176	0.0556897	0.435542		-1.24845	-2.38896	0.0383884	0.0916218		1.19568	1.87359	0.0874503	0.216394		1.80595	1.72813	1.37988	1.25383	1.37462	1.30865	1.39155	1.38078	1.20297	1.35611	1.37064
449631_at	449631		Snord15b	small nucleolar RNA, C/D box 14B	GO:0003674: molecular_function, GO:0005575: cellular_component, GO:0008150: biological_process		-1.50547	0.1507	0.227037	0.20436	-0.206896	0.838568	0.944457	0.931226	3.12558	0.00654177	0.30141	0.242314	-1.35678	-2.18368	0.0528771	0.483166	0.372056	1.26045	2.46911	0.0321624	0.395264	0.337649	-1.58562	-4.29372	0.0016338	0.00942803	0.00602731	1.07854	0.710708	0.491881	0.654267	0.609354	11.3083	10.8616	11.2656	10.4548	10.3128	11.0183	10.959	10.5876	10.7109	10.3383	10.2966
67963_at	67963	10577	Npc2	Niemann Pick type C2	GO:0005576: extracellular region, GO:0005622: intracellular, GO:0005622: intracellular, GO:0005764: lysosome, GO:0005764: lysosome, GO:0015485: cholesterol binding, GO:0015485: cholesterol binding, GO:0019899: enzyme binding, GO:0030301: cholesterol transport, GO:0030301: cholesterol transport, GO:0032366: intracellular sterol transport, GO:0032366: intracellular sterol transport, GO:0032367: int…	04142: Lysosome	-2.576	0.0197143	0.0457698	0.0355726	-0.0814069	0.936077	0.979122	0.974309	3.12501	0.00654961	0.30141	0.242314	-1.25294	-2.28264	0.0446041	0.458239	0.34732	1.19949	1.94381	0.0792561	0.472535	0.423249	-1.52536	-4.55476	0.00109301	0.00712815	0.00447026	-1.01495	-0.200561	0.844657	0.906015	0.890143	8.34321	8.263	8.1177	7.79034	7.83815	8.08179	7.94802	7.82621	7.44801	7.45339	7.77059
71640_at	71640		Zfp949	zinc finger protein 949	GO:0003674: molecular_function, GO:0005575: cellular_component, GO:0008150: biological_process, GO:0046872: metal ion binding		-4.58463	0.000268588	0.00149978	0.000938128	-0.454409	0.655328	0.871121	0.838101	3.12479	0.0065526	0.30141	0.242314	-1.28056	-2.41856	0.0352551	0.430659	0.320808	1.15227	1.71323	0.116066	0.510887	0.461192	-1.76281	-5.92733	0.00015491	0.00182076	0.00110183	-1.19467	-1.96284	0.0751261	0.195845	0.149888	6.73439	6.71721	6.93464	6.23883	6.55627	6.57526	6.37157	6.28828	5.88003	5.82497	5.88038
239789_at	239789	647309	Gm606	predicted gene 606	GO:0003674: molecular_function, GO:0005575: cellular_component, GO:0005634: nucleus, GO:0006260: DNA replication, GO:0007049: cell cycle, GO:0008283: cell proliferation		-5.20036	7.40323e-05	0.00052788		-0.990542	0.335908	0.685109		3.12469	0.006554	0.30141		-1.33329	-2.72175	0.0207851	0.357373		1.10365	1.27684	0.229239	0.611384		-1.84205	-6.25804	0.000100609	0.00136268		-1.25183	-2.54585	0.0269672	0.0997264		3.32149	3.53012	3.63902	2.95706	2.94912	3.27707	3.14184	2.83671	2.66735	2.34447	2.59465
723960_at	723960		Mir24-2	microRNA 24-2	GO:0042552: myelination, GO:0045069: regulation of viral genome replication, GO:0045069: regulation of viral genome replication, GO:0045766: positive regulation of angiogenesis, GO:0061298: retina vasculature development in camera-type eye, GO:0071222: cellular response to lipopolysaccharide		-0.44208	0.664047	0.733676		0.26886	0.791298	0.927632		3.12434	0.00655878	0.30141		-1.20872	-1.59043	0.141619	0.631391		1.20655	2.94036	0.0141037	0.336647		-1.27199	-2.30091	0.0445688	0.102258		1.14653	1.77311	0.103525	0.240925		1.04707	1.60371	1.3723	1.0135	1.21121	1.05761	1.05109	1.07365	1.03802	0.849867	1.0738
11837_at	11837	6175	Rplp0	ribosomal protein, large, P0	GO:0003735: structural constituent of ribosome, GO:0005622: intracellular, GO:0005634: nucleus, GO:0005737: cytoplasm, GO:0005840: ribosome, GO:0006414: translational elongation, GO:0022625: cytosolic large ribosomal subunit, GO:0030529: ribonucleoprotein complex, GO:0042254: ribosome biogenesis	03010: Ribosome	1.84155	0.0831971	0.141655	0.122472	0.483227	0.635148	0.860387	0.825965	3.1242	0.00656076	0.30141	0.242314	-1.20484	-1.85045	0.0928021	0.565154	0.456744	1.28682	2.47742	0.0316996	0.394235	0.336661	-1.07629	-0.970096	0.355224	0.469768	0.439702	1.44051	3.19323	0.0084326	0.0459607	0.0299065	4.87406	4.88988	4.9788	4.75815	4.8201	4.55703	4.41344	4.844	4.96248	4.67535	4.73721
13058_at	13058	1536	Cybb	cytochrome b-245, beta polypeptide	GO:0005216: ion channel activity, GO:0005244: voltage-gated ion channel activity, GO:0005622: intracellular, GO:0005737: cytoplasm, GO:0005739: mitochondrion, GO:0005783: endoplasmic reticulum, GO:0005791: rough endoplasmic reticulum, GO:0005794: Golgi apparatus, GO:0005886: plasma membrane, GO:0005886: plasma membrane, GO:0005887: integral to plasma membrane, GO:0006801: superoxide metabolic pro…	04145: Phagosome, 04380: Osteoclast differentiation, 04670: Leukocyte transendothelial migration	6.47858	5.89187e-06	6.97887e-05	4.18984e-05	4.89927	0.000138361	0.0348753	0.0218345	3.12135	0.00660005	0.301546	0.242314	1.35169	1.7977	0.10125	0.576687	0.469972	2.4961	7.48273	1.62078e-05	0.0136178	0.00858664	1.62443	4.28655	0.00165215	0.00951646	0.0060844	2.99974	7.33995	1.36863e-05	0.00066598	0.000395756	4.12847	3.93625	3.9105	3.76528	4.63599	4.68805	4.4577	4.77663	4.35085	5.00758	4.56222
17220_at	17220	4176	Mcm7	minichromosome maintenance deficient 7 (S. cerevisiae)	GO:0000166: nucleotide binding, GO:0003677: DNA binding, GO:0003678: DNA helicase activity, GO:0003697: single-stranded DNA binding, GO:0004386: helicase activity, GO:0005515: protein binding, GO:0005524: ATP binding, GO:0005634: nucleus, GO:0005634: nucleus, GO:0005829: cytosol, GO:0006260: DNA replication, GO:0006268: DNA unwinding involved in replication, GO:0006270: DNA-dependent DNA replicat…	03030: DNA replication, 04110: Cell cycle	3.45339	0.00306476	0.0107203	0.00735404	-3.16436	0.00570857	0.170688	0.1208	3.12043	0.00661278	0.301546	0.242314	-1.89335	-5.28879	0.000308787	0.123544	0.0738798	-1.10603	-0.743578	0.473481	0.771365	0.745686	1.09546	0.600908	0.561478	0.659703	0.636187	1.87525	5.73806	0.000124568	0.00265039	0.00158656	7.44218	7.01567	7.1072	6.00859	6.16407	6.37088	6.52096	7.09216	6.98166	7.40393	7.72934
114674_at	114674		Gtf2ird2	GTF2I repeat domain containing 2	GO:0003674: molecular_function, GO:0003677: DNA binding, GO:0005575: cellular_component, GO:0005634: nucleus, GO:0006351: transcription, DNA-dependent, GO:0006355: regulation of transcription, DNA-dependent, GO:0008150: biological_process		-2.05349	0.0558668	0.103558	0.0869325	-1.67622	0.112131	0.467167	0.397892	3.12022	0.00661569	0.301546	0.242314	-1.36884	-2.94147	0.014163	0.322194	0.230108	1.04444	0.66229	0.52209	0.800928	0.777603	-1.40275	-3.54683	0.0054247	0.0223569	0.0151573	1.01919	0.250009	0.807132	0.883433	0.863292	5.43273	5.20245	5.63299	4.88132	5.04201	5.07077	4.9188	4.75483	5.03721	5.05879	4.90965
258242_at	258242		Olfr955	olfactory receptor 955	GO:0004871: signal transducer activity, GO:0004930: G-protein coupled receptor activity, GO:0004984: olfactory receptor activity, GO:0007165: signal transduction, GO:0007186: G-protein coupled receptor signaling pathway, GO:0007608: sensory perception of smell, GO:0016021: integral to membrane, GO:0050911: detection of chemical stimulus involved in sensory perception of smell	04740: Olfactory transduction	-1.00781	0.327786	0.420617		-1.05439	0.306576	0.665504		3.11756	0.00665256	0.30268		-1.56772	-3.24941	0.00829513	0.277415		1.1903	1.22792	0.246355	0.625088		-1.56546	-3.71566	0.00411119	0.0183378		1.19202	1.15861	0.270855	0.44835		3.02336	3.08661	2.40684	1.97945	2.39615	2.2565	2.22168	2.22127	2.22841	2.10891	2.32601
11450_at	11450	9370	Adipoq	adiponectin, C1Q and collagen domain containing	GO:0001934: positive regulation of protein phosphorylation, GO:0005102: receptor binding, GO:0005179: hormone activity, GO:0005179: hormone activity, GO:0005179: hormone activity, GO:0005515: protein binding, GO:0005576: extracellular region, GO:0005581: collagen, GO:0005615: extracellular space, GO:0005615: extracellular space, GO:0005783: endoplasmic reticulum, GO:0006006: glucose metabolic pro…	03320: PPAR signaling pathway, 04920: Adipocytokine signaling pathway, 04930: Type II diabetes mellitus	-2.53627	0.0213911	0.0487332		-1.89381	0.075533	0.406419		3.1153	0.00668415	0.302796		-1.47499	-3.2504	0.00828084	0.277415		1.04286	0.468377	0.64911	0.864047		-1.56111	-4.53771	0.00112175	0.00726488		-1.01489	-0.171813	0.866666	0.919372		2.02911	2.43858	2.54264	1.74312	1.86926	1.94784	1.584	1.76236	1.63766	1.66324	1.77446
54484_at	54484	23608	Mkrn1	makorin, ring finger protein, 1	GO:0003676: nucleic acid binding, GO:0003682: chromatin binding, GO:0008152: metabolic process, GO:0008270: zinc ion binding, GO:0016874: ligase activity, GO:0046872: metal ion binding		-8.99535	7.61644e-08	2.48679e-06	1.47689e-06	-0.582333	0.568046	0.826131	0.788215	3.11357	0.00670835	0.302796	0.244097	-1.25919	-2.32353	0.0415636	0.451173	0.341581	1.13611	1.60884	0.137346	0.531488	0.482583	-2.27122	-10.7561	9.25275e-07	8.4809e-05	5.00932e-05	-1.58763	-5.0305	0.000369376	0.00539687	0.00327282	6.96322	7.07157	7.21136	6.89467	6.80928	6.63278	6.6597	5.91978	5.9802	5.8632	5.84147
235611_at	235611	5364	Plxnb1	plexin B1	GO:0002116: semaphorin receptor complex, GO:0004872: receptor activity, GO:0005096: GTPase activator activity, GO:0005515: protein binding, GO:0005622: intracellular, GO:0005886: plasma membrane, GO:0005887: integral to plasma membrane, GO:0007165: signal transduction, GO:0007275: multicellular organismal development, GO:0008360: regulation of cell shape, GO:0008360: regulation of cell shape, GO:…	04360: Axon guidance	1.81106	0.0879791	0.148097	0.128453	-2.46879	0.0245529	0.273962	0.209441	3.11342	0.00671051	0.302796	0.244097	-2.06896	-4.23415	0.00158425	0.184371	0.120553	-1.02982	-0.147124	0.885828	0.963216	0.959669	-1.12354	-1.04117	0.322686	0.437338	0.407138	1.78815	3.55385	0.0044374	0.0296446	0.0189259	5.80784	5.46692	5.6113	4.07646	3.99916	4.94925	5.01578	5.96231	5.30519	5.17629	5.28287
100316699_at	100316699		Mir1948	microRNA 1948	GO:0071230: cellular response to amino acid stimulus		-0.685696	0.502221	0.590658		-0.500563	0.623147	0.854015		3.11044	0.0067524	0.303259		-1.35864	-3.07967	0.0111336	0.305634		1.19894	1.49882	0.163439	0.55705		-1.3716	-3.1699	0.010178	0.0352498		1.18762	1.41017	0.185802	0.352613		3.37527	3.45917	3.185	2.84212	2.86323	2.82558	3.06445	2.73595	2.8248	2.71543	3.21789
259113_at	259113	81282	Olfr577	olfactory receptor 577	GO:0004871: signal transducer activity, GO:0004930: G-protein coupled receptor activity, GO:0004984: olfactory receptor activity, GO:0007165: signal transduction, GO:0007186: G-protein coupled receptor signaling pathway, GO:0007608: sensory perception of smell, GO:0016021: integral to membrane, GO:0050911: detection of chemical stimulus involved in sensory perception of smell	04740: Olfactory transduction	-1.5382	0.142548	0.217124		-1.92525	0.0712303	0.397149		3.10874	0.00677655	0.303259		-1.39127	-3.06142	0.0114927	0.306632		1.02876	0.427588	0.677609	0.877535		-1.35859	-3.6479	0.00459333	0.0198687		1.05352	0.63001	0.541398	0.693842		2.54836	2.84821	2.62934	2.27384	2.07823	2.01556	2.41539	2.3436	2.10566	2.18653	2.3071
233529_at	233529	65987	Kctd14	potassium channel tetramerisation domain containing 14	GO:0003674: molecular_function, GO:0005216: ion channel activity, GO:0005575: cellular_component, GO:0008150: biological_process, GO:0034220: ion transmembrane transport		-4.72062	0.000201413	0.0011859		-3.09325	0.00664656	0.177976		3.10824	0.00678355	0.303259		-1.58788	-4.91365	0.000542555	0.14705		-1.06689	-0.626634	0.544314	0.812832		-1.79076	-5.88798	0.000163232	0.00188357		-1.2032	-2.14443	0.0548816	0.160017		3.5011	3.62274	3.41007	2.87988	2.73706	2.87665	2.88841	2.33645	2.62994	2.79571	2.8743
20720_at	20720	5270	Serpine2	serine (or cysteine) peptidase inhibitor, clade E, member 2	GO:0004867: serine-type endopeptidase inhibitor activity, GO:0004867: serine-type endopeptidase inhibitor activity, GO:0005102: receptor binding, GO:0005102: receptor binding, GO:0005539: glycosaminoglycan binding, GO:0005576: extracellular region, GO:0005615: extracellular space, GO:0005615: extracellular space, GO:0005623: cell, GO:0005829: cytosol, GO:0007275: multicellular organismal developm…		13.2171	2.51333e-10	4.52508e-08	2.66306e-08	-1.91079	0.0731811	0.401175	0.331067	3.1081	0.00678561	0.303259	0.245507	-2.09148	-3.29169	0.00771092	0.274566	0.190763	1.08002	0.664304	0.520851	0.79999	0.776915	4.41317	8.62783	6.69429e-06	0.000252221	0.000149104	9.96859	17.0562	2.47928e-09	4.16619e-06	2.45185e-06	5.30914	5.70519	4.35114	4.04	4.35333	4.44747	3.6823	7.38263	7.28324	7.43492	7.36364
52668_at	52668		Ifi27l1	interferon, alpha-inducible protein 27 like 1	GO:0003674: molecular_function		-0.533908	0.600372	0.679156	0.662494	2.2302	0.0396148	0.323359	0.254392	3.10669	0.00680562	0.303615	0.245631	-1.02797	-0.295431	0.773473	0.956513	0.935636	1.31331	4.55461	0.000933353	0.115188	0.0766797	-1.21564	-2.67446	0.0236074	0.0646863	0.0487259	1.11057	1.31059	0.216379	0.388992	0.332618	6.63874	6.5552	6.75135	6.6117	6.47145	6.56912	6.77446	6.42115	6.37334	6.34744	6.33235
66102_at	66102	58191	Cxcl16	chemokine (C-X-C motif) ligand 16	GO:0005041: low-density lipoprotein receptor activity, GO:0005044: scavenger receptor activity, GO:0005125: cytokine activity, GO:0005615: extracellular space, GO:0006898: receptor-mediated endocytosis, GO:0006935: chemotaxis, GO:0008009: chemokine activity, GO:0008009: chemokine activity, GO:0016020: membrane, GO:0016021: integral to membrane, GO:0030307: positive regulation of cell growth, GO:0…	04060: Cytokine-cytokine receptor interaction, 04062: Chemokine signaling pathway	-8.54793	1.55498e-07	4.24187e-06	2.51819e-06	1.7864	0.092022	0.433444	0.364427	3.10242	0.00686669	0.305381	0.247234	-1.1457	-0.901474	0.387717	0.811818	0.748517	1.65911	3.62266	0.00433286	0.235856	0.180544	-3.98722	-9.09123	4.2157e-06	0.000196779	0.000116454	-2.09761	-6.61396	3.57205e-05	0.0011989	0.000717992	8.21809	7.59863	8.30316	7.85423	7.80093	7.8852	7.95939	5.90919	6.34486	6.30908	5.62501
12266_at	12266	718	C3	complement component 3	GO:0001798: positive regulation of type IIa hypersensitivity, GO:0001970: positive regulation of activation of membrane attack complex, GO:0004866: endopeptidase inhibitor activity, GO:0005515: protein binding, GO:0005576: extracellular region, GO:0005615: extracellular space, GO:0006954: inflammatory response, GO:0006956: complement activation, GO:0006956: complement activation, GO:0006957: comp…	04145: Phagosome, 04610: Complement and coagulation cascades, 05140: Leishmaniasis, 05142: Chagas disease (American trypanosomiasis), 05150: Staphylococcus aureus infection, 05322: Systemic lupus erythematosus	-13.6213	1.57572e-10	3.54622e-08	2.08699e-08	2.63856	0.0173252	0.241792	0.181874	3.09827	0.00692657	0.305981	0.248362	1.04968	-0.0684144	0.946752	0.991062	0.986901	2.25938	5.23622	0.000327082	0.0639102	0.0407725	-14.6511	-18.1625	6.7355e-09	8.21228e-06	4.83301e-06	-6.80674	-9.89409	7.43678e-07	0.000128391	7.55597e-05	11.4172	11.471	11.1849	11.447	12.1137	10.7441	11.0497	7.45522	7.88244	7.59189	6.84158
259107_at	259107		Olfr555	olfactory receptor 555	GO:0004871: signal transducer activity, GO:0004930: G-protein coupled receptor activity, GO:0004984: olfactory receptor activity, GO:0007165: signal transduction, GO:0007186: G-protein coupled receptor signaling pathway, GO:0007608: sensory perception of smell, GO:0016021: integral to membrane, GO:0050911: detection of chemical stimulus involved in sensory perception of smell	04740: Olfactory transduction	-0.477018	0.639471	0.712816		-1.02623	0.319276	0.672769		3.09798	0.00693079	0.305981		-1.3674	-2.82852	0.0172491	0.339076		1.11951	1.21935	0.249459	0.627557		-1.30671	-2.76247	0.0203183	0.0580266		1.17151	1.56191	0.146259	0.302329		1.38377	1.73785	1.82962	1.05913	1.2501	1.31736	1.20682	1.36633	1.24855	1.36409	1.11408
71742_at	71742	25989	Ulk3	unc-51-like kinase 3	GO:0000166: nucleotide binding, GO:0004672: protein kinase activity, GO:0004674: protein serine/threonine kinase activity, GO:0005524: ATP binding, GO:0005737: cytoplasm, GO:0006468: protein phosphorylation, GO:0006914: autophagy, GO:0016301: kinase activity, GO:0016310: phosphorylation, GO:0016740: transferase activity, GO:0016772: transferase activity, transferring phosphorus-containing groups,…	04140: Regulation of autophagy, 04150: mTOR signaling pathway	-1.76517	0.0956323	0.158409	0.138251	0.037149	0.970802	0.990244	0.988647	3.09672	0.0069491	0.306222	0.248393	-1.23904	-1.86165	0.0910949	0.562296	0.453305	1.20233	2.47773	0.0316829	0.394235	0.336661	-1.43196	-3.61309	0.00486357	0.020736	0.0139521	1.04034	0.494248	0.630735	0.761543	0.726592	4.67861	4.58158	4.98857	4.19303	4.42351	4.50253	4.64797	4.31983	4.40313	3.99829	4.21656
170722_at	170722		Nxf7	nuclear RNA export factor 7	GO:0003723: RNA binding, GO:0003729: mRNA binding, GO:0005737: cytoplasm	03008: Ribosome biogenesis in eukaryotes, 03013: RNA transport, 03015: mRNA surveillance pathway	-2.13809	0.0474477	0.0910687		0.689476	0.4999	0.788714		3.0948	0.00697699	0.306915		-1.16448	-1.48957	0.165995	0.654683		1.23877	2.70527	0.021285	0.366176		-1.42359	-3.51435	0.00572395	0.0232332		1.0133	0.175014	0.86421	0.917925		2.19029	2.52688	2.43271	2.04903	2.17607	2.23889	2.21066	2.1087	1.95637	1.60025	1.80875
217335_at	217335	85302	Fbf1	Fas (TNFRSF6) binding factor 1	GO:0000922: spindle pole, GO:0005515: protein binding, GO:0005737: cytoplasm, GO:0005856: cytoskeleton, GO:0030054: cell junction, GO:0043297: apical junction assembly, GO:0090162: establishment of epithelial cell polarity		-1.50985	0.149587	0.225711	0.203091	-1.59699	0.128832	0.488312	0.418729	3.09255	0.00700994	0.307292	0.249965	-1.34473	-2.812	0.0177538	0.340615	0.247361	1.04831	0.737765	0.47686	0.7737	0.74807	-1.33703	-3.25549	0.00881314	0.0317621	0.0222148	1.05434	0.678726	0.51117	0.670232	0.626151	5.02928	5.17214	5.38935	4.75754	4.61143	4.79378	4.92863	4.79984	4.81677	4.6041	4.90499
319924_at	319924	320	Apba1	amyloid beta (A4) precursor protein binding, family A, member 1	GO:0001540: beta-amyloid binding, GO:0001701: in utero embryonic development, GO:0005515: protein binding, GO:0005546: phosphatidylinositol-4,5-bisphosphate binding, GO:0005622: intracellular, GO:0005623: cell, GO:0005634: nucleus, GO:0005886: plasma membrane, GO:0006810: transport, GO:0006886: intracellular protein transport, GO:0007268: synaptic transmission, GO:0007268: synaptic transmission, …		-4.10516	0.000749332	0.00343727	0.00221691	-2.93817	0.00924466	0.200018	0.143447	3.09041	0.00704145	0.307658	0.250359	-1.99668	-4.10177	0.00196633	0.194592	0.128006	-1.06831	-0.815511	0.432933	0.749564	0.720659	-2.4158	-9.06076	4.34331e-06	0.000200508	0.000118653	-1.29256	-1.40732	0.186624	0.353582	0.297868	5.74099	5.4572	5.98029	4.12536	4.42434	5.19007	4.98997	4.60913	4.44243	4.41856	4.3975
100503481_at	100503481		4930453H23Rik	RIKEN cDNA 4930453H23 gene	GO:0003674: molecular_function, GO:0005575: cellular_component, GO:0008150: biological_process		-1.3983	0.18014	0.261496		0.60604	0.552558	0.817729		3.09032	0.00704272	0.307658		-1.22169	-1.37352	0.198445	0.690885		1.28306	3.86568	0.00287393	0.19943		-1.45161	-3.00932	0.0133527	0.0429242		1.07983	0.946396	0.364029	0.541883		1.81545	1.95398	2.53486	1.85443	1.71217	1.78591	2.01923	1.66932	1.67333	1.53252	1.51177
77552_at	77552	149345	Shisa4	shisa homolog 4 (Xenopus laevis)	GO:0016020: membrane, GO:0016021: integral to membrane		0.219947	0.828552	0.869701	0.860431	-1.94453	0.0687019	0.392837	0.322947	3.08936	0.00705684	0.307742	0.250359	-1.4497	-3.43582	0.0060179	0.263448	0.178183	1.02404	0.365139	0.722273	0.897761	0.887499	-1.21613	-2.13388	0.0590558	0.125553	0.102245	1.22072	2.15735	0.0536575	0.157596	0.117118	4.27151	4.23692	4.14072	3.988	3.62029	3.44541	3.61704	3.59003	4.05917	4.00387	4.03841
55932_at	55932	115361	Gbp3	guanylate binding protein 3	GO:0000166: nucleotide binding, GO:0003924: GTPase activity, GO:0005525: GTP binding, GO:0005737: cytoplasm, GO:0005829: cytosol, GO:0020005: symbiont-containing vacuole membrane, GO:0031410: cytoplasmic vesicle, GO:0035458: cellular response to interferon-beta, GO:0042832: defense response to protozoan, GO:0050830: defense response to Gram-positive bacterium, GO:0051856: adhesion to symbiont, GO…		-0.796744	0.436672	0.529043	0.508046	5.87703	1.88817e-05	0.0101262	0.00608892	3.08427	0.00713241	0.309431	0.251311	1.85914	2.6784	0.0224197	0.368548	0.269152	4.64466	9.0459	2.8423e-06	0.00796032	0.00468473	-1.93768	-3.1501	0.0105235	0.0361335	0.0255827	1.28932	1.57245	0.143806	0.298901	0.244494	6.33919	5.60361	6.63133	7.08802	6.2227	7.43259	7.51946	5.86684	4.59874	5.02667	5.39921
66259_at	66259	55450	Camk2n1	calcium/calmodulin-dependent protein kinase II inhibitor 1	GO:0004860: protein kinase inhibitor activity, GO:0005886: plasma membrane, GO:0006469: negative regulation of protein kinase activity, GO:0006469: negative regulation of protein kinase activity, GO:0008427: calcium-dependent protein kinase inhibitor activity, GO:0014069: postsynaptic density, GO:0016020: membrane, GO:0019901: protein kinase binding, GO:0030054: cell junction, GO:0030425: dendrit…		-5.23803	6.85102e-05	0.000495373	0.000302645	-1.46865	0.160331	0.528417	0.459056	3.08148	0.00717406	0.310268	0.251663	-1.64203	-3.31456	0.00741273	0.273155	0.188611	1.13505	0.929966	0.373325	0.711748	0.680917	-2.72845	-11.7934	3.96822e-07	5.12938e-05	3.03425e-05	-1.46393	-2.24067	0.0463647	0.143158	0.105091	7.30379	7.09122	7.30293	5.83297	6.46287	6.71966	6.8658	5.96803	5.82005	5.62877	5.71255
11864_at	11864	9915	Arnt2	aryl hydrocarbon receptor nuclear translocator 2	GO:0001666: response to hypoxia, GO:0001666: response to hypoxia, GO:0003677: DNA binding, GO:0003700: sequence-specific DNA binding transcription factor activity, GO:0004871: signal transducer activity, GO:0005634: nucleus, GO:0005634: nucleus, GO:0005667: transcription factor complex, GO:0005737: cytoplasm, GO:0006351: transcription, DNA-dependent, GO:0006355: regulation of transcription, DNA-d…	05200: Pathways in cancer, 05211: Renal cell carcinoma	1.29151	0.213945	0.299262	0.27573	-3.72333	0.00170961	0.108819	0.0739368	3.08133	0.00717631	0.310268	0.251663	-2.40233	-5.43773	0.000248252	0.108535	0.0649944	-1.20357	-1.44373	0.178049	0.569852	0.526189	-1.21564	-1.62518	0.135661	0.23005	0.201239	1.64194	3.0403	0.0110946	0.0554094	0.0366054	6.06374	5.57352	5.6951	4.32678	3.92125	4.74715	4.91825	5.51678	5.81546	5.49707	5.1358
381489_at	381489	59350	Rxfp1	relaxin/insulin-like family peptide receptor 1	GO:0004871: signal transducer activity, GO:0004930: G-protein coupled receptor activity, GO:0004930: G-protein coupled receptor activity, GO:0005886: plasma membrane, GO:0007165: signal transduction, GO:0007186: G-protein coupled receptor signaling pathway, GO:0007188: adenylate cyclase-modulating G-protein coupled receptor signaling pathway, GO:0007188: adenylate cyclase-modulating G-protein cou…	04080: Neuroactive ligand-receptor interaction	4.88198	0.000143461	0.000900829	0.000555175	-2.86764	0.0107311	0.207997	0.150317	3.07718	0.00723883	0.311318	0.252346	-1.98537	-5.46886	0.000237279	0.108535	0.0649944	-1.07378	-0.478278	0.642278	0.861177	0.846437	1.3408	2.07218	0.0654763	0.135386	0.11127	2.47909	6.54945	3.90253e-05	0.00125628	0.000751819	8.32509	8.08316	8.32435	7.1091	6.89094	7.60275	7.33673	8.93425	8.64207	8.86159	8.11543
258929_at	258929	403284	Olfr799	olfactory receptor 799	GO:0004871: signal transducer activity, GO:0004930: G-protein coupled receptor activity, GO:0004984: olfactory receptor activity, GO:0007165: signal transduction, GO:0007186: G-protein coupled receptor signaling pathway, GO:0007608: sensory perception of smell, GO:0016021: integral to membrane, GO:0050911: detection of chemical stimulus involved in sensory perception of smell	04740: Olfactory transduction	0.416589	0.682232	0.74873		-0.0510033	0.959922	0.986588		3.07477	0.00727552	0.311318		-1.24235	-2.1113	0.0598389	0.501802		1.18133	2.0089	0.0710228	0.45814		-1.18771	-1.66785	0.126784	0.218809		1.23567	2.63957	0.0227996	0.0890851		0.887083	1.15334	0.835135	0.554569	0.794868	0.577965	0.669356	0.602036	0.946741	0.405081	0.853127
65086_at	65086	23566	Lpar3	lysophosphatidic acid receptor 3	GO:0000187: activation of MAPK activity, GO:0001965: G-protein alpha-subunit binding, GO:0004871: signal transducer activity, GO:0004930: G-protein coupled receptor activity, GO:0005543: phospholipid binding, GO:0005886: plasma membrane, GO:0007165: signal transduction, GO:0007186: G-protein coupled receptor signaling pathway, GO:0016020: membrane, GO:0016021: integral to membrane, GO:0032060: bl…	04080: Neuroactive ligand-receptor interaction	7.57108	8.05758e-07	1.49338e-05	8.89332e-06	-2.82694	0.0116916	0.212819	0.155128	3.0733	0.00729786	0.311318	0.252346	-1.66288	-4.52428	0.000994738	0.1767	0.113515	-1.04572	-0.460032	0.654895	0.866371	0.852583	1.54447	3.916	0.00297143	0.0145376	0.00952836	2.45598	9.26353	1.43867e-06	0.000176893	0.000104614	4.59816	5.11733	4.73913	4.07537	4.20406	4.03107	4.08996	5.47506	5.18364	5.44181	5.70227
14238_at	14238	2295	Foxf2	forkhead box F2	GO:0000122: negative regulation of transcription from RNA polymerase II promoter, GO:0003677: DNA binding, GO:0003677: DNA binding, GO:0003690: double-stranded DNA binding, GO:0003700: sequence-specific DNA binding transcription factor activity, GO:0003700: sequence-specific DNA binding transcription factor activity, GO:0003705: RNA polymerase II distal enhancer sequence-specific DNA binding tran…		-3.05568	0.00720134	0.0208856		1.81179	0.0878616	0.425724		3.0732	0.00729941	0.311318		-1.07199	-0.731482	0.480626	0.857857		1.42474	3.58146	0.00464805	0.241623		-1.6202	-5.6141	0.000236341	0.00241378		-1.06082	-0.588608	0.56787	0.714294		2.97224	2.89544	2.93991	2.96277	2.70267	2.63552	3.00711	2.34496	2.42083	2.13932	2.01986
449630_at	449630		Snord15a	small nucleolar RNA, C/D box 15A	GO:0003674: molecular_function, GO:0005575: cellular_component, GO:0008150: biological_process		-4.11442	0.000734532	0.00338166	0.00217921	0.535764	0.599116	0.841578	0.805771	3.06814	0.00737694	0.31251	0.253309	-1.34487	-1.66581	0.125517	0.611427	0.505132	1.54787	3.48568	0.00547569	0.249492	0.197435	-2.80209	-7.67333	1.85116e-05	0.000470774	0.000280205	-1.34606	-1.53809	0.15194	0.309579	0.254762	9.79504	9.24098	9.96032	8.91079	8.62175	9.77446	9.48643	8.38926	8.4053	7.91758	8.06914
668863_at	668863		Gm9405	predicted gene 9405			-2.68145	0.0158499	0.0384887		0.435934	0.668412	0.876587		3.06178	0.00747562	0.314935		-1.19595	-1.58984	0.141752	0.631712		1.27204	2.96907	0.0134132	0.332768		-1.58515	-6.15553	0.000114832	0.00148206		-1.04197	-0.277625	0.786386	0.869637		1.89453	1.78069	1.89441	1.49634	1.57019	1.27016	1.97006	1.30886	1.15898	1.07879	1.21527
109335_at	109335		9230102K24Rik	RIKEN cDNA 9230102K24 gene			-2.30896	0.0338847	0.069943		0.76664	0.453893	0.761496		3.06123	0.00748417	0.314935		-1.17692	-1.49152	0.165493	0.654224		1.28608	2.82256	0.017333	0.357192		-1.51511	-3.93201	0.00289597	0.0142741		-1.00099	0.000402764	0.999686	0.999702		3.01431	3.31244	2.9595	2.79833	2.68742	3.05491	2.90927	2.67008	2.55777	2.14514	2.59033
240879_at	240879	149281	Mettl11b	methyltransferase like 11B	GO:0003674: molecular_function, GO:0005575: cellular_component, GO:0008150: biological_process, GO:0008168: methyltransferase activity, GO:0016740: transferase activity, GO:0032259: methylation		-0.718826	0.482089	0.571971		-0.557883	0.584254	0.83443		3.05673	0.00755491	0.316435		-1.32719	-2.44892	0.0334444	0.423478		1.17204	1.69852	0.118874	0.513686		-1.351	-3.19741	0.00971711	0.0340653		1.15138	1.29897	0.220203	0.393194		2.06283	1.63361	1.89368	1.28953	1.64888	1.29152	1.59426	1.6	1.39718	1.44745	1.29888
74454_at	74454		4933408J17Rik	RIKEN cDNA 4933408J17 gene	GO:0003674: molecular_function, GO:0005575: cellular_component, GO:0008150: biological_process		-2.00744	0.0610004	0.110784		-0.102821	0.919318	0.972946		3.05656	0.00755752	0.316435		-1.17499	-1.66785	0.125104	0.610333		1.13843	2.23269	0.0484611	0.421595		-1.31913	-3.95088	0.00280957	0.0139956		1.01403	0.210455	0.837113	0.901494		2.52579	2.40498	2.44936	2.0036	2.29901	2.28869	2.30026	2.02774	2.1024	2.03492	2.0789
73144_at	73144		3110039I08Rik	RIKEN cDNA 3110039I08 gene			-2.47864	0.0240649	0.0535422	0.042221	-2.45842	0.025076	0.275441	0.210431	3.05577	0.00757004	0.316435	0.258147	-1.95493	-4.36447	0.00128359	0.18216	0.119185	-1.03039	-0.149246	0.884194	0.962731	0.959249	-1.95048	-4.4458	0.00129118	0.00800777	0.00505901	-1.02805	-0.168748	0.869021	0.920784	0.90699	5.18309	4.76251	5.48473	4.12974	3.78869	4.58468	4.21028	4.04854	3.89396	4.69437	4.06137
100861722_at	100861722		LOC100861722	uncharacterized LOC100861722			-4.10602	0.000747946	0.00343464	0.00221502	-2.85697	0.0109753	0.209849	0.152015	3.04992	0.00766306	0.318939	0.260559	-1.99707	-4.16563	0.00177121	0.192005	0.127122	-1.06431	-0.669867	0.517437	0.797801	0.774345	-2.44131	-8.78455	5.71271e-06	0.000232249	0.000137346	-1.30107	-1.43153	0.179739	0.345128	0.289652	6.36989	5.96062	5.9819	4.78458	4.50214	5.40593	5.53518	4.98485	4.92623	4.58926	4.7844
241327_at	241327	169611	Olfml2a	olfactomedin-like 2A	GO:0005576: extracellular region, GO:0030198: extracellular matrix organization, GO:0031012: extracellular matrix, GO:0042803: protein homodimerization activity, GO:0050840: extracellular matrix binding		2.19896	0.0421264	0.0829237	0.0681464	-0.786321	0.442587	0.755766	0.710304	3.04809	0.00769244	0.31895	0.260559	-1.36047	-2.40915	0.0358359	0.431322	0.322884	1.16159	1.85161	0.0924481	0.486278	0.43758	-1.04707	-0.620255	0.549175	0.649578	0.625304	1.50926	3.37005	0.00614861	0.0370359	0.023822	4.56035	4.42407	4.53818	3.74655	3.83412	3.95949	4.56633	4.56682	4.32475	4.42924	4.43852
57808_at	57808	6165	Rpl35a	ribosomal protein L35A	GO:0003674: molecular_function, GO:0005739: mitochondrion, GO:0006364: rRNA processing, GO:0022625: cytosolic large ribosomal subunit, GO:0042273: ribosomal large subunit biogenesis	03010: Ribosome	-0.0414904	0.967392	0.976496	0.974553	1.07597	0.29709	0.658088	0.602843	3.04803	0.00769346	0.31895	0.260559	-1.19918	-1.47106	0.170844	0.65926	0.563052	1.536	3.11984	0.0103101	0.318558	0.261884	-1.38666	-2.76417	0.0202593	0.0579558	0.0431978	1.32832	1.98121	0.072798	0.191916	0.146505	4.27966	4.37919	4.44096	4.03347	4.04453	4.56042	3.63356	3.51631	3.84059	3.72456	4.36331
16795_at	16795	9215	Large	like-glycosyltransferase	GO:0005515: protein binding, GO:0005794: Golgi apparatus, GO:0008152: metabolic process, GO:0009101: glycoprotein biosynthetic process, GO:0016020: membrane, GO:0016021: integral to membrane, GO:0016740: transferase activity, GO:0016757: transferase activity, transferring glycosyl groups, GO:0046716: muscle cell homeostasis		0.353756	0.727905	0.787585	0.774809	-2.41229	0.0275343	0.283695	0.219003	3.0459	0.00772775	0.319505	0.260591	-1.54823	-3.53086	0.00511528	0.255318	0.170135	-1.00374	-0.125159	0.902767	0.968016	0.964848	-1.23197	-2.64278	0.0249179	0.0670206	0.0507418	1.25204	2.005	0.0698828	0.187231	0.142414	6.6227	6.48679	6.77924	5.60463	5.92115	6.32227	6.07513	6.36966	6.27866	6.2928	6.38997
100505050_at	100505050						-5.82204	2.10536e-05	0.00018805	0.000113691	-1.91347	0.072816	0.400743	0.330423	3.04008	0.0078222	0.321228	0.261326	-1.94782	-3.36941	0.00674464	0.273155	0.188418	1.08259	0.527725	0.608687	0.843945	0.826769	-3.61945	-9.61163	2.56415e-06	0.000148579	8.78442e-05	-1.71645	-2.98481	0.0122581	0.0589561	0.0392242	7.44853	7.15623	8.06318	6.35958	5.96532	6.94867	7.04626	5.73953	5.78563	5.78563	5.6911
232811_at	232811	84787	Suv420h2	suppressor of variegation 4-20 homolog 2 (Drosophila)	GO:0000780: condensed nuclear chromosome, centromeric region, GO:0005634: nucleus, GO:0005694: chromosome, GO:0006351: transcription, DNA-dependent, GO:0006355: regulation of transcription, DNA-dependent, GO:0008168: methyltransferase activity, GO:0016568: chromatin modification, GO:0016571: histone methylation, GO:0016740: transferase activity, GO:0018024: histone-lysine N-methyltransferase acti…	00310: Lysine degradation	-3.92442	0.00110672	0.00470918	0.00307732	0.0257249	0.979779	0.993735	0.992762	3.03828	0.00785166	0.321228	0.261326	-1.18951	-1.704	0.118001	0.601625	0.495327	1.16182	2.23516	0.0482547	0.421084	0.368026	-1.53144	-5.155	0.000450001	0.00378848	0.00232023	-1.10814	-1.28018	0.226505	0.401046	0.344648	6.23258	5.89271	5.98435	5.72327	5.87703	5.83133	5.73633	5.39071	5.43105	5.37167	5.51777
73495_at	73495		Samt3	spermatogenesis associated multipass transmembrane protein 3	GO:0003674: molecular_function, GO:0005575: cellular_component, GO:0008150: biological_process		-2.4868	0.0236682	0.0528462		-0.192688	0.849504	0.947783		3.03758	0.00786313	0.321228		-1.22422	-1.90544	0.0846923	0.550948		1.15405	2.05311	0.0658958	0.451841		-1.43008	-3.87693	0.00316445	0.0151988		-1.01222	-0.162309	0.87397	0.92366		1.14512	1.42825	1.55486	1.12742	0.978949	1.14402	1.12041	0.954777	0.853957	0.701715	0.954777
668620_at	668620		Zfp936	zinc finger protein 936	GO:0003674: molecular_function, GO:0005575: cellular_component, GO:0008150: biological_process, GO:0046872: metal ion binding		-1.46747	0.160647	0.238951		-1.57153	0.134629	0.496628		3.03548	0.00789766	0.321647		-1.59745	-3.05256	0.011671	0.306803		1.08475	0.879171	0.399028	0.729204		-1.59261	-3.54106	0.00547666	0.0225048		1.08805	0.783616	0.44961	0.616956		2.50929	3.24189	3.15779	2.35821	2.45862	1.91532	2.51124	2.13442	2.27731	2.49715	2.39899
19703_at	19703	5973	Renbp	renin binding protein	GO:0003824: catalytic activity, GO:0004476: mannose-6-phosphate isomerase activity, GO:0004857: enzyme inhibitor activity, GO:0005524: ATP binding, GO:0006013: mannose metabolic process, GO:0006044: N-acetylglucosamine metabolic process, GO:0006044: N-acetylglucosamine metabolic process, GO:0006051: N-acetylmannosamine metabolic process, GO:0010951: negative regulation of endopeptidase activity, …	00520: Amino sugar and nucleotide sugar metabolism	-0.348297	0.731926	0.790893	0.778094	-0.653449	0.522276	0.802342	0.761663	3.0354	0.00789889	0.321647	0.26213	-1.34026	-2.3388	0.040481	0.446795	0.337353	1.15946	1.87738	0.0885712	0.480565	0.432297	-1.31917	-2.93333	0.015191	0.0470688	0.0342884	1.178	1.59366	0.138977	0.292019	0.237949	5.1402	4.85056	5.14169	4.43841	4.30725	5.02423	4.63715	4.74256	4.55204	4.43534	4.83906
71790_at	71790	8416	Anxa9	annexin A9	GO:0001786: phosphatidylserine binding, GO:0005509: calcium ion binding, GO:0005543: phospholipid binding, GO:0005544: calcium-dependent phospholipid binding, GO:0005829: cytosol, GO:0007165: signal transduction, GO:0007268: synaptic transmission, GO:0009986: cell surface, GO:0015464: acetylcholine receptor activity, GO:0016337: cell-cell adhesion		-5.02628	0.000106151	0.000708402	0.000434863	-3.02699	0.00765527	0.187024	0.132921	3.03164	0.00796112	0.322791	0.262575	-2.06985	-3.87485	0.0028625	0.217561	0.142748	-1.09008	-1.20691	0.254016	0.631927	0.592799	-2.75492	-7.30233	2.82034e-05	0.000597391	0.000355756	-1.45087	-2.47666	0.0305149	0.108649	0.0769905	4.80844	4.16031	5.10108	3.25666	3.29583	3.97793	4.04808	3.2523	3.27538	3.34332	3.24278
56417_at	56417	103	Adar	adenosine deaminase, RNA-specific	GO:0003677: DNA binding, GO:0003692: left-handed Z-DNA binding, GO:0003723: RNA binding, GO:0003725: double-stranded RNA binding, GO:0003726: double-stranded RNA adenosine deaminase activity, GO:0004000: adenosine deaminase activity, GO:0005622: intracellular, GO:0005634: nucleus, GO:0005634: nucleus, GO:0005730: nucleolus, GO:0005737: cytoplasm, GO:0006351: transcription, DNA-dependent, GO:00063…	04623: Cytosolic DNA-sensing pathway	-7.39062	1.10688e-06	1.91885e-05	1.14421e-05	2.14332	0.0469677	0.34311	0.27376	3.03138	0.00796539	0.322791	0.262575	-1.04148	-0.381243	0.710688	0.941211	0.912047	1.38027	4.00586	0.00227489	0.181458	0.132336	-2.06254	-8.63531	6.64348e-06	0.000250705	0.000148208	-1.4348	-4.01257	0.00199268	0.0171601	0.0106713	7.0689	6.74437	6.87789	6.97372	6.73065	6.84246	6.82106	5.74185	5.98008	5.88792	5.81457
79565_at	79565	155368	Wbscr27	Williams Beuren syndrome chromosome region 27 (human)	GO:0003674: molecular_function, GO:0005575: cellular_component, GO:0008150: biological_process		-2.34454	0.0315576	0.0661324	0.0533294	-0.276176	0.785769	0.925966	0.907371	3.02788	0.00802376	0.323595	0.262747	-1.35763	-2.31787	0.0419721	0.452308	0.342849	1.20919	1.97101	0.0757128	0.464841	0.413965	-1.64532	-3.71682	0.0041034	0.0183172	0.0121894	-1.00225	-0.0538646	0.957997	0.9751	0.970205	5.18388	5.55453	5.88217	5.1034	5.21602	5.21433	4.95928	5.18114	4.71211	4.56442	4.86727
622531_at	622531		Gm6330	predicted gene 6330			5.48651	4.12552e-05	0.000326698	0.000198373	-3.14423	0.00596001	0.173184	0.122573	3.02524	0.00806812	0.324171	0.262926	-1.7716	-4.33006	0.00135663	0.18216	0.119185	-1.08132	-0.906869	0.384864	0.719388	0.688196	1.31386	2.79007	0.0193849	0.0561707	0.0416988	2.15258	6.42298	4.64914e-05	0.00140849	0.000843098	4.75774	4.34255	4.78724	3.43426	3.7042	4.05645	3.99359	5.04849	4.85562	5.21517	5.005
57764_at	57764	59277	Ntn4	netrin 4	GO:0005576: extracellular region, GO:0005578: proteinaceous extracellular matrix, GO:0005604: basement membrane, GO:0005604: basement membrane, GO:0016322: neuron remodeling, GO:0043237: laminin-1 binding, GO:0060668: regulation of branching involved in salivary gland morphogenesis by extracellular matrix-epithelial cell signaling	04360: Axon guidance	-1.63314	0.120965	0.190364	0.169028	-3.35629	0.00377902	0.150957	0.104978	3.02439	0.0080824	0.324171	0.262926	-1.59883	-4.03226	0.00220457	0.199232	0.130637	-1.08899	-1.17341	0.266622	0.642431	0.60254	-1.40519	-3.74604	0.00391251	0.0176736	0.0117391	1.04482	0.536878	0.601912	0.740862	0.703373	4.6933	4.79547	4.43283	3.80837	4.26283	3.76846	3.99197	4.25093	4.26511	4.12163	3.97431
381524_at	381524		AI427809	expressed sequence AI427809			-4.08083	0.000789653	0.00358301		-2.36196	0.0304731	0.294811		3.02367	0.00809465	0.324171		-1.65336	-3.76163	0.00346031	0.228645		-1.00481	-0.0743886	0.942103	0.982763		-1.98988	-6.64238	6.20272e-05	0.000988422		-1.20932	-1.4944	0.162854	0.323731		3.75596	3.29408	3.57212	2.41324	2.7661	2.86565	3.16652	2.79896	2.46	2.58129	2.36404
620078_at	620078		C130026I21Rik	RIKEN cDNA C130026I21 gene	GO:0003674: molecular_function, GO:0005575: cellular_component, GO:0008150: biological_process		-2.36285	0.0304191	0.0643458		1.18734	0.251548	0.617194		3.02321	0.00810234	0.324171		-1.10883	-0.999281	0.340319	0.784505		1.26438	3.26406	0.00802461	0.294121		-1.40862	-3.89	0.00309846	0.0149575		-1.00474	-0.0605719	0.952773	0.972134		3.05818	3.11707	3.37475	3.00098	3.00098	3.18622	2.96508	2.51264	2.83083	2.69676	2.72468
50770_at	50770	23250	Atp11a	ATPase, class VI, type 11A	GO:0000166: nucleotide binding, GO:0000287: magnesium ion binding, GO:0004012: phospholipid-translocating ATPase activity, GO:0005524: ATP binding, GO:0005768: endosome, GO:0005783: endoplasmic reticulum, GO:0005886: plasma membrane, GO:0006200: ATP catabolic process, GO:0006812: cation transport, GO:0008152: metabolic process, GO:0015662: ATPase activity, coupled to transmembrane movement of ion…		-2.03261	0.0581437	0.106773	0.0898816	-2.90982	0.00981653	0.203544	0.146802	3.01717	0.00820501	0.325473	0.263833	-1.49396	-3.70555	0.00380315	0.234606	0.154245	-1.04925	-0.62488	0.545421	0.813216	0.791003	-1.40013	-3.37391	0.0072286	0.0275357	0.0189951	1.01694	0.231709	0.820966	0.891798	0.873178	8.50857	8.29479	8.75781	7.9165	7.87338	7.93678	8.07965	7.86001	8.14836	8.19061	7.96516
11641_at	11641	11217	Akap2	A kinase (PRKA) anchor protein 2	GO:0005515: protein binding, GO:0007015: actin filament organization, GO:0007178: transmembrane receptor protein serine/threonine kinase signaling pathway, GO:0008104: protein localization, GO:0016301: kinase activity, GO:0016310: phosphorylation, GO:0019904: protein domain specific binding, GO:0043234: protein complex, GO:0051018: protein kinase A binding, GO:0051291: protein heterooligomerizati…		-0.408975	0.687704	0.753795	0.740466	-3.5501	0.00248681	0.128448	0.0878319	3.01383	0.00826241	0.325473	0.263833	-1.84457	-5.02225	0.000459917	0.143525	0.0893202	-1.1345	-1.20243	0.255674	0.633011	0.593886	-1.35314	-3.07091	0.01203	0.0398094	0.0285251	1.20157	1.55189	0.148626	0.30507	0.250479	6.26078	6.50135	6.33381	5.38591	5.27342	5.89548	5.29278	5.77617	6.06664	5.66567	6.16424
100042419_at	100042419		Trav7d-3	T cell receptor alpha variable 7D-3			-0.532649	0.601224	0.679908		-1.57263	0.134373	0.496344		3.01354	0.00826748	0.325473		-1.68682	-3.01858	0.0123822	0.310948		1.07904	0.931108	0.372761	0.711503		-1.49632	-2.44949	0.0346358	0.0849168		1.21642	1.9444	0.0775321	0.200212		1.25985	2.09433	2.15265	1.39177	1.26526	1.04042	0.764167	1.13496	1.64835	1.18515	1.19934
244114_at	244114		Vmn2r72-ps	vomeronasal 2, receptor 72, pseudogene			-2.84678	0.0112134	0.0293536		-2.19998	0.0420422	0.331574		3.012	0.00829406	0.325473		-1.50864	-3.24328	0.00838338	0.277415		1.00952	0.0977419	0.923982	0.975207		-1.59074	-4.13351	0.00210075	0.011381		-1.04447	-0.530959	0.605874	0.743291		1.07346	1.28386	1.73752	0.74943	0.681261	0.863987	0.890848	0.815605	0.663681	0.75527	0.648697
69263_at	69263	5983	Rfc3	replication factor C (activator 1) 3	GO:0000166: nucleotide binding, GO:0003677: DNA binding, GO:0005524: ATP binding, GO:0005634: nucleus, GO:0005663: DNA replication factor C complex, GO:0006200: ATP catabolic process, GO:0006260: DNA replication, GO:0008152: metabolic process, GO:0017111: nucleoside-triphosphatase activity	03030: DNA replication, 03420: Nucleotide excision repair, 03430: Mismatch repair	3.2483	0.00476768	0.01512	0.0106592	-2.46353	0.0248167	0.274986	0.210022	3.0112	0.00830784	0.325473	0.263833	-1.73001	-3.82024	0.00313618	0.220082	0.143912	-1.02088	-0.193614	0.850181	0.948603	0.942218	1.05016	0.475476	0.644819	0.731901	0.710907	1.77963	5.36275	0.000219769	0.00379938	0.00229743	5.60225	5.32356	4.88086	4.74397	4.54094	4.15216	4.53334	5.06324	5.30147	5.53419	5.52786
24053_at	24053	6445	Sgcg	sarcoglycan, gamma (dystrophin-associated glycoprotein)	GO:0005515: protein binding, GO:0005737: cytoplasm, GO:0005856: cytoskeleton, GO:0005886: plasma membrane, GO:0005887: integral to plasma membrane, GO:0007010: cytoskeleton organization, GO:0016012: sarcoglycan complex, GO:0016020: membrane, GO:0016021: integral to membrane, GO:0016044: cellular membrane organization	05410: Hypertrophic cardiomyopathy (HCM), 05412: Arrhythmogenic right ventricular cardiomyopathy (ARVC), 05414: Dilated cardiomyopathy, 05416: Viral myocarditis	-5.33524	5.61296e-05	0.000420947	0.000256825	-1.49563	0.153226	0.519205	0.449637	3.0108	0.00831475	0.325473	0.263833	-2.13446	-3.2283	0.00860346	0.279457	0.197866	1.22512	1.01158	0.334535	0.686053	0.652701	-5.15467	-11.8871	3.68791e-07	4.99438e-05	2.95505e-05	-1.97121	-2.44069	0.0325358	0.113179	0.0806385	5.59502	4.69964	5.30726	3.28995	3.48152	4.99491	4.19553	2.77152	3.09733	2.80884	2.82221
15439_at	15439	3240	Hp	haptoglobin	GO:0001889: liver development, GO:0003824: catalytic activity, GO:0004252: serine-type endopeptidase activity, GO:0005576: extracellular region, GO:0005615: extracellular space, GO:0005783: endoplasmic reticulum, GO:0005794: Golgi apparatus, GO:0006508: proteolysis, GO:0010942: positive regulation of cell death, GO:0030492: hemoglobin binding, GO:0031838: haptoglobin-hemoglobin complex, GO:004254…		0.195739	0.847153	0.884123	0.876398	3.79722	0.00145704	0.102874	0.0683978	3.00926	0.00834149	0.325473	0.263833	1.27847	1.0916	0.299629	0.767226	0.690612	3.39478	5.69552	0.000167489	0.0426438	0.0270058	-1.6109	-3.76227	0.00381048	0.0173339	0.0115075	1.64836	1.96855	0.0743956	0.194566	0.148891	4.2104	4.1628	4.78521	4.44508	4.12137	5.37694	4.82528	3.90469	3.57709	3.49088	3.88905
669130_at	669130		Gm9442	predicted gene 9442			-0.584716	0.566479	0.648397	0.631118	-1.49705	0.152859	0.518918	0.449314	3.00644	0.00839066	0.326886	0.264824	-1.48104	-2.81391	0.0176949	0.340615	0.247085	1.07326	0.997824	0.340858	0.689896	0.65658	-1.37198	-2.73629	0.0212456	0.0599386	0.0448242	1.15857	1.53502	0.152686	0.310572	0.255781	3.94836	3.36271	3.85601	3.32278	2.95861	3.46084	2.88837	3.04029	3.38339	3.37141	3.3307
107723_at	107723	9990	Slc12a6	solute carrier family 12, member 6	GO:0005215: transporter activity, GO:0005515: protein binding, GO:0005886: plasma membrane, GO:0006810: transport, GO:0006811: ion transport, GO:0006812: cation transport, GO:0006813: potassium ion transport, GO:0006821: chloride transport, GO:0015293: symporter activity, GO:0015377: cation:chloride symporter activity, GO:0015379: potassium:chloride symporter activity, GO:0016020: membrane, GO:00…		-1.02024	0.322026	0.414687	0.391359	-1.41879	0.174175	0.54234	0.474684	3.00062	0.00849302	0.327252	0.266054	-1.50741	-3.61096	0.00446358	0.246021	0.162529	1.06922	0.754268	0.467307	0.768967	0.742744	-1.4264	-2.8965	0.0161725	0.0492204	0.0360213	1.12995	1.266	0.231356	0.405533	0.349377	6.22116	6.12547	6.36724	5.30011	5.606	5.78418	5.84668	6.15561	5.49235	5.3194	5.80548
258565_at	258565		Olfr1009	olfactory receptor 1009	GO:0004871: signal transducer activity, GO:0004930: G-protein coupled receptor activity, GO:0004984: olfactory receptor activity, GO:0005886: plasma membrane, GO:0007165: signal transduction, GO:0007186: G-protein coupled receptor signaling pathway, GO:0007186: G-protein coupled receptor signaling pathway, GO:0007608: sensory perception of smell, GO:0016020: membrane, GO:0016021: integral to memb…	04740: Olfactory transduction	0.151132	0.881665	0.911835		0.113834	0.910714	0.969707		2.99879	0.00852556	0.327252		-1.2401	-2.24626	0.0474891	0.466938		1.23568	1.92559	0.0817162	0.475395		-1.23156	-2.39521	0.037983	0.0909556		1.24425	1.92389	0.0802928	0.204871		2.62797	2.40608	2.63299	2.31264	2.16032	2.25947	2.25951	2.0465	2.4235	2.22717	2.31281
140919_at	140919	57084	Slc17a6	solute carrier family 17 (sodium-dependent inorganic phosphate cotransporter), member 6	GO:0001504: neurotransmitter uptake, GO:0003333: amino acid transmembrane transport, GO:0005313: L-glutamate transmembrane transporter activity, GO:0005313: L-glutamate transmembrane transporter activity, GO:0005769: early endosome, GO:0006810: transport, GO:0006811: ion transport, GO:0006814: sodium ion transport, GO:0006836: neurotransmitter transport, GO:0008021: synaptic vesicle, GO:0015293: …		-2.3335	0.0322629	0.0672834		-0.0476798	0.962531	0.987527		2.99868	0.00852744	0.327252		-1.26875	-1.86639	0.0903799	0.561487		1.2413	2.77054	0.0189862	0.358996		-1.62293	-5.79469	0.000184947	0.00203482		-1.0305	-0.0408133	0.968167	0.981129		2.61059	2.61817	2.62161	2.10477	1.7637	2.68356	2.38319	1.98129	1.891	1.68115	2.08873
68051_at	68051	10204	Nutf2	nuclear transport factor 2	GO:0005622: intracellular, GO:0006606: protein import into nucleus, GO:0006611: protein export from nucleus, GO:0008565: protein transporter activity, GO:0015630: microtubule cytoskeleton		3.91211	0.00113654	0.00481283	0.00314778	-4.22021	0.000585033	0.0682701	0.0447339	2.99796	0.00854015	0.327252	0.266054	-2.10792	-4.9653	0.000501444	0.143525	0.0893202	-1.25691	-2.34955	0.0395955	0.410338	0.353727	1.15778	1.23817	0.244361	0.355395	0.324487	1.94168	5.28092	0.000249386	0.00414369	0.00250965	5.90891	6.10892	5.7124	5.35617	4.79062	4.34117	4.69607	5.75229	6.21457	6.38106	6.10277
104362_at	104362	644890	Meig1	meiosis expressed gene 1	GO:0005515: protein binding, GO:0005634: nucleus, GO:0007126: meiosis, GO:0007283: spermatogenesis, GO:0030154: cell differentiation		-0.0881684	0.930781	0.948781		0.169343	0.867541	0.954652		2.99715	0.00855459	0.327252		-1.20399	-1.89268	0.0865126	0.55501		1.20174	2.13103	0.0577013	0.439455		-1.22472	-2.30515	0.0442503	0.101675		1.1814	1.79763	0.0993727	0.235044		1.57843	1.54426	1.66712	1.18432	1.33726	1.22951	1.54099	1.38842	1.21994	1.05499	1.51547
215257_at	215257	56300	Il1f9	interleukin 1 family, member 9	GO:0003674: molecular_function, GO:0005125: cytokine activity, GO:0005575: cellular_component, GO:0005615: extracellular space, GO:0008150: biological_process		-2.73381	0.0142118	0.0353486	0.0267943	5.99319	1.50222e-05	0.00910559	0.00541691	2.99679	0.00856103	0.327252	0.266054	2.67597	3.56435	0.00483164	0.25116	0.16668	11.9011	7.43984	1.7063e-05	0.0138739	0.00872803	-4.46393	-12.5906	2.16172e-07	3.54843e-05	2.08829e-05	-1.00372	-0.344682	0.736755	0.836637	0.810337	3.98347	3.34031	3.99302	5.4272	3.92953	5.68466	5.31058	1.66288	1.76206	1.47582	1.66271
723911_at	723911		Mir367	microRNA 367	GO:0030324: lung development		-1.14542	0.268026	0.358573		-0.191769	0.850213	0.947941		2.99674	0.00856197	0.327252		-1.19607	-1.74287	0.110768	0.590863		1.1461	2.2781	0.0448091	0.417349		-1.28197	-3.52224	0.00564973	0.0230134		1.0693	0.809	0.435458	0.605314		0.963154	1.08801	1.04567	0.838813	0.720451	0.990713	0.506745	0.725934	0.689699	0.650375	0.631496
27357_at	27357	2992	Gyg	glycogenin	GO:0005536: glucose binding, GO:0005978: glycogen biosynthetic process, GO:0008466: glycogenin glucosyltransferase activity, GO:0016740: transferase activity, GO:0016757: transferase activity, transferring glycosyl groups, GO:0046872: metal ion binding		-0.803846	0.43267	0.525053	0.503904	-2.58916	0.0191871	0.249622	0.187993	2.99664	0.00856374	0.327252	0.266054	-1.59283	-3.72346	0.00368998	0.231944	0.152455	-1.03398	-0.343572	0.737965	0.904461	0.894626	-1.36844	-3.56939	0.00522645	0.0218109	0.014731	1.12572	1.16623	0.267889	0.445287	0.389873	6.77869	6.71849	6.71653	5.66857	5.95079	6.48283	6.04304	6.54591	6.10103	6.14856	6.30442
53627_at	53627	64840	Porcn	porcupine homolog (Drosophila)	GO:0005515: protein binding, GO:0005783: endoplasmic reticulum, GO:0008152: metabolic process, GO:0009100: glycoprotein metabolic process, GO:0016020: membrane, GO:0016021: integral to membrane, GO:0016055: Wnt receptor signaling pathway, GO:0016740: transferase activity, GO:0016746: transferase activity, transferring acyl groups, GO:0030176: integral to endoplasmic reticulum membrane	04310: Wnt signaling pathway	-4.76086	0.000185029	0.00110431	0.000684754	-2.75997	0.0134555	0.223278	0.164991	2.99345	0.00862079	0.327252	0.266054	-1.84048	-3.84366	0.00301561	0.219687	0.143912	-1.05572	-0.620311	0.548311	0.815189	0.793062	-2.37995	-7.76519	1.67176e-05	0.000441385	0.000262508	-1.36516	-2.06991	0.0624745	0.174061	0.131323	7.17918	7.05033	6.61541	6.05953	6.52711	5.50468	6.0815	5.44673	5.75833	5.83362	5.79721
100862027_at	100862027		LOC100862027	zinc finger protein 765-like			0.158426	0.876003	0.907506		-0.210978	0.835433	0.943415		2.99326	0.00862425	0.327252		-1.35129	-2.21636	0.0499941	0.474759		1.24821	2.0681	0.064239	0.448907		-1.30782	-2.27476	0.0465842	0.105632		1.2897	2.11383	0.0578879	0.16564		1.45637	1.02539	0.765019	0.767463	0.513663	0.535039	0.859209	0.771315	0.60675	0.738955	0.771315
100529082_at	100529082	3134	Gm11127	predicted gene 11127	GO:0003674: molecular_function, GO:0005575: cellular_component, GO:0008150: biological_process		-3.66763	0.00192859	0.0073443		0.133272	0.895555	0.964632		2.99163	0.00865351	0.327252		-1.23249	-1.64026	0.130782	0.617087		1.24942	3.43137	0.00601105	0.259849		-1.79749	-7.54761	2.13142e-05	0.000505895		-1.16727	-1.04185	0.319569	0.497564		2.41165	2.61405	2.55373	2.59046	1.84685	1.87203	2.44644	1.61006	1.78648	1.74241	1.58263
100504421_at	100504421		2900076A07Rik	RIKEN cDNA 2900076A07 gene	GO:0003674: molecular_function, GO:0005575: cellular_component, GO:0008150: biological_process		2.9335	0.00933666	0.0255564	0.0187575	-1.49669	0.152953	0.518918	0.449314	2.9895	0.00869198	0.327252	0.266054	-1.33723	-3.00329	0.0127162	0.312537	0.223616	1.05573	0.673141	0.515434	0.796227	0.772943	1.02231	0.229064	0.823507	0.873551	0.862096	1.44325	4.1708	0.00151993	0.0142527	0.00880383	5.2993	5.11635	5.09223	4.90059	4.66502	4.6976	4.73742	5.22519	5.02029	5.3952	5.15023
545562_at	545562		Amy2b	amylase 2b		04972: Pancreatic secretion	-1.01529	0.324311	0.416859		-1.13802	0.271018	0.635114		2.98717	0.00873436	0.327995		-1.7777	-3.2435	0.00838023	0.277415		1.18333	1.13403	0.282068	0.653942		-1.73145	-3.00132	0.0135349	0.0433166		1.21494	1.33612	0.208169	0.379757		1.37622	2.43166	1.7171	0.798037	1.33109	1.11588	1.02681	1.12866	0.647244	1.41013	1.18591
13841_at	13841	2045	Epha7	Eph receptor A7	GO:0000166: nucleotide binding, GO:0004672: protein kinase activity, GO:0004713: protein tyrosine kinase activity, GO:0004714: transmembrane receptor protein tyrosine kinase activity, GO:0005003: ephrin receptor activity, GO:0005004: GPI-linked ephrin receptor activity, GO:0005515: protein binding, GO:0005524: ATP binding, GO:0005886: plasma membrane, GO:0005887: integral to plasma membrane, GO:0…	04360: Axon guidance	5.39338	4.98494e-05	0.000381105	0.000232244	-0.268882	0.791282	0.927632	0.910019	2.97898	0.00888444	0.330612	0.268125	-1.25607	-2.22766	0.0490326	0.472482	0.359036	1.1643	1.76125	0.107311	0.500761	0.452781	1.24747	2.19149	0.0536089	0.11675	0.0943675	1.82436	6.63415	3.47486e-05	0.00118202	0.000708051	4.17966	4.41273	4.42723	3.9446	3.83984	4.1678	4.08696	4.48261	4.63072	4.52827	4.9611
100302601_at	100302601		Snord83b	small nucleolar RNA, C/D box 83B	GO:0003674: molecular_function, GO:0005575: cellular_component, GO:0008150: biological_process		-0.735416	0.472189	0.563408	0.542897	-0.855327	0.404357	0.733359	0.685746	2.97853	0.00889292	0.330612	0.268125	-1.60669	-2.58373	0.0264476	0.3911	0.285822	1.22709	1.83022	0.0957862	0.490311	0.441386	-1.64236	-3.65392	0.00454823	0.0197218	0.0132187	1.20044	1.31305	0.215577	0.38809	0.331776	8.6599	7.99539	8.59219	7.35305	7.11936	8.22862	8.05097	7.95252	7.84808	7.36672	7.68425
66263_at	66263		1810014B01Rik	RIKEN cDNA 1810014B01 gene	GO:0003674: molecular_function, GO:0005575: cellular_component, GO:0008150: biological_process		-0.922	0.36953	0.462983		-2.43089	0.0265169	0.280823		2.97351	0.0089862	0.331741		-1.87205	-3.34153	0.0070761	0.273155		-1.01998	-0.294041	0.774471	0.919976		-1.60005	-3.11317	0.0112003	0.0378135		1.14707	1.27676	0.227666	0.402197		3.17496	2.69003	2.18484	1.87789	1.82779	2.2201	1.2525	1.97111	2.1873	1.99715	2.07899
66358_at	66358	56985	2310004I24Rik	RIKEN cDNA 2310004I24 gene	GO:0003674: molecular_function, GO:0005575: cellular_component, GO:0008150: biological_process, GO:0008152: metabolic process, GO:0016787: hydrolase activity, GO:0046872: metal ion binding, GO:0047631: ADP-ribose diphosphatase activity, GO:0047734: CDP-glycerol diphosphatase activity	00230: Purine metabolism, 00564: Glycerophospholipid metabolism	0.575892	0.572293	0.653612	0.636195	-1.45357	0.164419	0.531663	0.462807	2.9721	0.00901272	0.331741	0.268936	-1.43313	-3.21602	0.00878823	0.280608	0.198822	1.06793	0.738571	0.476391	0.773447	0.747814	-1.19392	-1.64644	0.13117	0.224566	0.19593	1.2819	2.60126	0.0244203	0.0929817	0.0648963	5.06466	5.39526	5.00222	4.79154	4.76155	4.45832	4.54263	5.19279	4.97836	4.72915	4.675
20356_at	20356	9037	Sema5a	sema domain, seven thrombospondin repeats (type 1 and type 1-like), transmembrane domain (TM) and short cytoplasmic domain, (semaphorin) 5A	GO:0001569: patterning of blood vessels, GO:0007411: axon guidance, GO:0008046: axon guidance receptor activity, GO:0016020: membrane, GO:0016021: integral to membrane, GO:0048754: branching morphogenesis of a tube	04360: Axon guidance	4.86863	0.000147529	0.000921364	0.000568281	-2.00733	0.0610139	0.374832	0.305236	2.9717	0.00902011	0.331741	0.268936	-1.80795	-3.4836	0.00554522	0.256936	0.172811	1.03504	0.318137	0.756633	0.912783	0.903168	1.36706	2.70888	0.022262	0.0619629	0.0464792	2.55817	5.76264	0.000120104	0.00259357	0.00155293	7.35849	7.08217	7.45487	5.91457	5.91622	6.97745	6.69517	8.11954	7.50411	7.66117	7.67128
100040771_at	100040771		Gm2959	predicted gene 2959			-4.22689	0.0005767	0.00278313		-0.514405	0.613643	0.849428		2.97154	0.0090231	0.331741		-1.46058	-3.06064	0.0115081	0.306632		1.26971	1.50532	0.161786	0.554543		-2.30956	-7.82544	1.56442e-05	0.000426988		-1.24537	-1.58845	0.140149	0.293722		2.61727	2.56055	2.92142	2.25347	1.91921	1.91517	2.48042	1.6674	1.62962	1.14643	1.50454
12571_at	12571	1021	Cdk6	cyclin-dependent kinase 6	GO:0000166: nucleotide binding, GO:0000307: cyclin-dependent protein kinase holoenzyme complex, GO:0001726: ruffle, GO:0001954: positive regulation of cell-matrix adhesion, GO:0002244: hemopoietic progenitor cell differentiation, GO:0003323: type B pancreatic cell development, GO:0004672: protein kinase activity, GO:0004674: protein serine/threonine kinase activity, GO:0004693: cyclin-dependent p…	04110: Cell cycle, 04115: p53 signaling pathway, 05200: Pathways in cancer, 05212: Pancreatic cancer, 05214: Glioma, 05218: Melanoma, 05220: Chronic myeloid leukemia, 05222: Small cell lung cancer, 05223: Non-small cell lung cancer	-3.21353	0.00513729	0.0160201	0.0113386	-0.918213	0.371452	0.711507	0.660672	2.97137	0.00902634	0.331741	0.268936	-1.56744	-2.74544	0.0199427	0.351771	0.256074	1.2104	1.55055	0.150675	0.544739	0.497466	-2.22868	-7.26698	2.93811e-05	0.000612556	0.000365331	-1.1747	-0.758957	0.463639	0.630305	0.583343	6.79964	6.39658	6.52886	5.32014	5.52983	6.35996	6.26095	5.72939	5.48803	5.175	5.2567
100504672_at	100504672		AA666905	expressed sequence AA666905			-3.08696	0.00673644	0.0198433	0.014298	-0.942694	0.359145	0.702584	0.650417	2.9658	0.00913159	0.333556	0.270599	-1.33454	-2.56087	0.0275228	0.396621	0.28935	1.11764	1.27178	0.230963	0.612676	0.571684	-1.58425	-4.97983	0.000579917	0.00452476	0.00278528	-1.06216	-0.669014	0.517115	0.674632	0.631253	5.53565	5.07268	5.3889	4.91182	4.7794	5.10028	4.90508	4.6526	4.78636	4.61012	4.67007
16328_at	16328	11190	Cep250	centrosomal protein 250	GO:0000278: mitotic cell cycle, GO:0005737: cytoplasm, GO:0005813: centrosome, GO:0005814: centriole, GO:0005814: centriole, GO:0005856: cytoskeleton, GO:0005929: cilium, GO:0007049: cell cycle, GO:0008022: protein C-terminus binding, GO:0008104: protein localization, GO:0010457: centriole-centriole cohesion, GO:0019901: protein kinase binding, GO:0030997: regulation of centriole-centriole cohesi…		1.44848	0.165819	0.245241	0.222301	-1.43188	0.17045	0.537692	0.470012	2.96444	0.00915738	0.333556	0.270599	-1.33657	-2.81904	0.0175371	0.340615	0.247085	1.06323	0.788014	0.448155	0.757574	0.730461	-1.0876	-1.10448	0.295643	0.409584	0.379362	1.30662	2.79562	0.0172263	0.0744015	0.0502528	4.65268	4.574	4.60581	4.19503	3.99321	4.08329	4.45628	4.61025	4.43256	4.32205	4.57697
258035_at	258035	403273	Olfr191	olfactory receptor 191	GO:0004871: signal transducer activity, GO:0004930: G-protein coupled receptor activity, GO:0004984: olfactory receptor activity, GO:0007165: signal transduction, GO:0007186: G-protein coupled receptor signaling pathway, GO:0007608: sensory perception of smell, GO:0016021: integral to membrane, GO:0050911: detection of chemical stimulus involved in sensory perception of smell		-2.77884	0.0129339	0.0327845		0.655679	0.520875	0.801683		2.96319	0.00918135	0.333947		-1.21317	-1.59203	0.14126	0.631111		1.3449	2.77818	0.0187339	0.358547		-1.72247	-5.14199	0.000458484	0.00383671		-1.05569	-0.435202	0.67173	0.7902		1.6581	1.5833	1.93858	1.47199	1.03513	1.62486	1.61704	1.11472	0.915994	1.10544	0.609595
80908_at	80908	28	Abo	ABO blood group (transferase A, alpha 1-3-N-acetylgalactosaminyltransferase, transferase B, alpha 1-3-galactosyltransferase)	GO:0001962: alpha-1,3-galactosyltransferase activity, GO:0004380: glycoprotein-fucosylgalactoside alpha-N-acetylgalactosaminyltransferase activity, GO:0004380: glycoprotein-fucosylgalactoside alpha-N-acetylgalactosaminyltransferase activity, GO:0004381: fucosylgalactoside 3-alpha-galactosyltransferase activity, GO:0005576: extracellular region, GO:0005794: Golgi apparatus, GO:0005975: carbohydrat…	00601: Glycosphingolipid biosynthesis - lacto and neolacto series, 01100: Metabolic pathways	-2.1562	0.045803	0.0885958		-0.269891	0.790518	0.927632		2.96174	0.00920892	0.334076		-1.22597	-2.17531	0.0536411	0.485485		1.15808	1.66663	0.125171	0.519456		-1.40129	-4.46434	0.00125494	0.00786083		1.01319	0.076723	0.940205	0.964778		2.99217	2.9042	2.95402	2.80254	2.5482	2.68185	2.58022	2.61018	2.43141	2.33802	2.46232
240675_at	240675	340706	Vwa2	von Willebrand factor A domain containing 2	GO:0005576: extracellular region, GO:0005604: basement membrane, GO:0007161: calcium-independent cell-matrix adhesion, GO:0007161: calcium-independent cell-matrix adhesion, GO:0042802: identical protein binding		-0.486196	0.633085	0.707212	0.691749	-2.28064	0.0358497	0.312627	0.244532	2.95869	0.00926753	0.334704	0.27196	-2.48937	-5.53144	0.000216755	0.106275	0.0637239	-1.10189	-0.0150495	0.988276	0.995821	0.994713	-1.64529	-2.10847	0.0616234	0.129497	0.105789	1.37312	3.29593	0.00701759	0.0406259	0.0262346	5.53492	4.90666	5.96595	4.17923	4.31644	4.01376	4.33515	3.92848	5.12128	5.48635	4.14363
242864_at	242864	222236	Napepld	N-acyl phosphatidylethanolamine phospholipase D	GO:0004620: phospholipase activity, GO:0006629: lipid metabolic process, GO:0008152: metabolic process, GO:0008270: zinc ion binding, GO:0009395: phospholipid catabolic process, GO:0016020: membrane, GO:0016787: hydrolase activity, GO:0046872: metal ion binding, GO:0070290: NAPE-specific phospholipase D activity		-1.72326	0.103123	0.168022	0.147529	-3.89524	0.00117875	0.0946227	0.0624414	2.95832	0.00927477	0.334704	0.27196	-1.61879	-5.08354	0.000419278	0.143525	0.0888484	-1.12549	-1.35603	0.203602	0.592907	0.55014	-1.37497	-3.8102	0.00352505	0.0164312	0.0108473	1.04606	0.419136	0.683087	0.798857	0.768693	6.20739	6.07141	6.10972	5.31544	5.46719	5.37856	5.56906	5.45055	5.78473	5.80121	5.62101
207792_at	207792	57710	BC034090	cDNA sequence BC034090	GO:0003674: molecular_function, GO:0005575: cellular_component, GO:0008150: biological_process		4.15495	0.000673155	0.00314934		-0.84978	0.407348	0.734861		2.9574	0.0092924	0.334704		-1.30514	-2.33125	0.0410129	0.449543		1.118	1.53698	0.153938	0.547272		1.12814	1.46382	0.174424	0.276059		1.64612	4.91528	0.000443875	0.00612052		3.20314	3.16848	3.39936	2.60982	2.7045	2.93051	3.19009	3.4802	3.443	3.2562	3.54333
269295_at	269295	349667	Rtn4rl2	reticulon 4 receptor-like 2	GO:0004872: receptor activity, GO:0005886: plasma membrane, GO:0009897: external side of plasma membrane, GO:0009986: cell surface, GO:0016020: membrane, GO:0031103: axon regeneration, GO:0031225: anchored to membrane, GO:0045121: membrane raft, GO:0046658: anchored to plasma membrane		0.308511	0.761472	0.815288	0.803133	-0.489776	0.630602	0.857853	0.82382	2.95726	0.00929512	0.334704	0.27196	-1.2963	-2.18347	0.0528964	0.483166	0.372056	1.15179	1.78949	0.102448	0.495358	0.447699	-1.21427	-1.7945	0.10344	0.188348	0.161179	1.2296	2.31789	0.0404603	0.130883	0.0948165	4.51705	3.97724	4.21215	3.88979	3.6782	3.98007	3.9457	3.80639	3.95353	3.92335	4.18044
15376_at	15376	3170	Foxa2	forkhead box A2	GO:0000122: negative regulation of transcription from RNA polymerase II promoter, GO:0000432: positive regulation of transcription from RNA polymerase II promoter by glucose, GO:0000433: negative regulation of transcription from RNA polymerase II promoter by glucose, GO:0000978: RNA polymerase II core promoter proximal region sequence-specific DNA binding, GO:0001077: RNA polymerase II core promo…	04950: Maturity onset diabetes of the young	-1.35218	0.194171	0.277327	0.254039	0.371029	0.715235	0.896561	0.87137	2.95531	0.00933289	0.335231	0.272528	-1.24179	-1.97105	0.0758767	0.535222	0.425065	1.2749	2.23865	0.0479658	0.421084	0.367312	-1.44634	-3.17426	0.0101035	0.0350784	0.024736	1.0946	0.858126	0.408911	0.582317	0.531294	5.00961	5.14788	5.41183	4.81454	4.78336	4.82858	5.09902	4.74444	4.72268	4.22869	4.8909
258215_at	258215		Olfr506	olfactory receptor 506	GO:0004871: signal transducer activity, GO:0004930: G-protein coupled receptor activity, GO:0004984: olfactory receptor activity, GO:0007165: signal transduction, GO:0007186: G-protein coupled receptor signaling pathway, GO:0007608: sensory perception of smell, GO:0016021: integral to membrane, GO:0050911: detection of chemical stimulus involved in sensory perception of smell		-1.49966	0.152188	0.228908		-1.37202	0.18803	0.556906		2.95513	0.00933637	0.335231		-2.27879	-2.90635	0.0150577	0.328895		1.19616	1.29471	0.223232	0.608165		-2.36157	-3.15561	0.0104261	0.0359062		1.15423	0.941665	0.366342	0.544106		0.825052	1.80129	2.65017	1.18624	0.627085	0.510617	0.588912	0.520001	0.689861	0.643293	0.928475
19730_at	19730	5900	Ralgds	ral guanine nucleotide dissociation stimulator	GO:0005083: small GTPase regulator activity, GO:0005085: guanyl-nucleotide exchange factor activity, GO:0005515: protein binding, GO:0005622: intracellular, GO:0007165: signal transduction, GO:0007264: small GTPase mediated signal transduction, GO:0050790: regulation of catalytic activity, GO:0050790: regulation of catalytic activity, GO:0051056: regulation of small GTPase mediated signal transdu…	05200: Pathways in cancer, 05210: Colorectal cancer, 05212: Pancreatic cancer	-2.21543	0.0407844	0.0809266	0.0663372	1.30847	0.208263	0.576993	0.51351	2.95321	0.00937382	0.335796	0.273185	-1.10091	-0.922846	0.376981	0.804792	0.740287	1.33572	3.66568	0.00402727	0.230708	0.175707	-1.47936	-4.66909	0.000919344	0.00631652	0.00393694	-1.00602	0.0320821	0.974974	0.984876	0.981725	6.10394	6.01397	6.17612	5.88388	5.70409	6.31621	5.86487	5.67436	5.45284	5.3374	5.64698
381835_at	381835	100130827	Gm1078	predicted gene 1078	GO:0000166: nucleotide binding, GO:0003674: molecular_function, GO:0004674: protein serine/threonine kinase activity, GO:0005524: ATP binding, GO:0005575: cellular_component, GO:0008150: biological_process		-1.39736	0.180416	0.26167		-1.02928	0.317883	0.671928		2.95296	0.00937874	0.335796		-1.45256	-2.56627	0.027265	0.394966		1.14394	1.48948	0.165842	0.559521		-1.53445	-4.06686	0.00233469	0.0122908		1.08289	0.704727	0.495454	0.656878		2.77455	3.12246	2.51114	2.49596	1.78021	2.43267	2.3314	2.29402	2.23104	2.14486	2.15226
17909_at	17909	4651	Myo10	myosin X	GO:0000166: nucleotide binding, GO:0001726: ruffle, GO:0003774: motor activity, GO:0003779: actin binding, GO:0005516: calmodulin binding, GO:0005524: ATP binding, GO:0005543: phospholipid binding, GO:0005737: cytoplasm, GO:0005856: cytoskeleton, GO:0005886: plasma membrane, GO:0006810: transport, GO:0008152: metabolic process, GO:0008360: regulation of cell shape, GO:0016020: membrane, GO:001645…	04666: Fc gamma R-mediated phagocytosis	-2.9556	0.00890935	0.0246184	0.0180253	-2.32411	0.0328747	0.301432	0.235207	2.95109	0.00941525	0.336148	0.273319	-1.45372	-3.4567	0.00580648	0.261816	0.176306	-1.0075	-0.0674682	0.94748	0.984182	0.981968	-1.53291	-5.04726	0.000525694	0.00422398	0.00259419	-1.06239	-0.548285	0.594316	0.73505	0.69742	7.56488	7.54001	7.42419	6.8117	7.10977	6.72074	7.18946	6.89939	7.0405	6.95882	6.65169
100041724_at	100041724		Gm15217	predicted gene 15217	GO:0003674: molecular_function, GO:0005575: cellular_component, GO:0008150: biological_process		-0.759663	0.457943	0.549689		0.820708	0.423261	0.745126		2.94442	0.0095467	0.339399		-1.23619	-1.63413	0.132075	0.619757		1.41129	2.72343	0.020619	0.365076		-1.46287	-2.73933	0.0211357	0.0597049		1.19261	1.5006	0.161266	0.321663		2.67754	3.2229	3.07386	2.37826	2.89651	2.65862	2.82639	2.43764	2.45893	1.96021	2.84976
14964_at	14964	3105	H2-D1	histocompatibility 2, D region locus 1	GO:0001916: positive regulation of T cell mediated cytotoxicity, GO:0002474: antigen processing and presentation of peptide antigen via MHC class I, GO:0002485: antigen processing and presentation of endogenous peptide antigen via MHC class I via ER pathway, TAP-dependent, GO:0005515: protein binding, GO:0005886: plasma membrane, GO:0006955: immune response, GO:0009897: external side of plasma me…	04144: Endocytosis, 04145: Phagosome, 04514: Cell adhesion molecules (CAMs), 04612: Antigen processing and presentation, 04650: Natural killer cell mediated cytotoxicity, 04940: Type I diabetes mellitus, 05320: Autoimmune thyroid disease, 05330: Allograft rejection, 05332: Graft-versus-host disease, 05416: Viral myocarditis	-6.05098	1.34158e-05	0.000131887	7.94767e-05	1.40694	0.177603	0.546285	0.478737	2.94126	0.00960958	0.340195	0.276417	-1.08618	-0.776113	0.454954	0.844612	0.793263	1.28736	3.8772	0.002819	0.197927	0.146727	-1.83452	-7.0458	3.80788e-05	0.000726406	0.000434732	-1.31195	-3.02414	0.0114215	0.0564271	0.0373105	10.295	10.3343	10.0386	10.3399	9.90038	10.0237	10.1362	9.45721	9.41837	9.34613	9.17449
75620_at	75620	79036	2810422J05Rik	RIKEN cDNA 2810422J05 gene	GO:0003674: molecular_function, GO:0005575: cellular_component, GO:0008150: biological_process		-4.59897	0.000260542	0.00146329	0.000914982	-0.892148	0.384865	0.721242	0.671577	2.93052	0.00982631	0.343228	0.278077	-1.30028	-2.31367	0.0422781	0.453525	0.344037	1.10681	1.47358	0.17	0.562855	0.518778	-1.74205	-6.41839	8.20357e-05	0.00119112	0.000716255	-1.21046	-1.85224	0.0906617	0.221429	0.172564	5.8339	5.57909	5.58769	5.08023	5.23045	5.62784	5.17006	5.06417	4.74192	4.86535	4.7914
225913_at	225913	26007	Dak	dihydroxyacetone kinase 2 homolog (yeast)	GO:0000166: nucleotide binding, GO:0003824: catalytic activity, GO:0004371: glycerone kinase activity, GO:0005524: ATP binding, GO:0005575: cellular_component, GO:0006071: glycerol metabolic process, GO:0008152: metabolic process, GO:0016301: kinase activity, GO:0016310: phosphorylation, GO:0016740: transferase activity, GO:0016829: lyase activity, GO:0034012: FAD-AMP lyase (cyclizing) activity, …	00561: Glycerolipid metabolism, 01100: Metabolic pathways, 04622: RIG-I-like receptor signaling pathway	-4.63149	0.000243186	0.0013865	0.000865503	0.0611014	0.951997	0.983444	0.979804	2.92973	0.00984243	0.343228	0.278077	-1.23124	-2.14154	0.0568304	0.493725	0.381717	1.21261	1.89069	0.086627	0.479499	0.430639	-1.80083	-6.44259	7.95709e-05	0.00116744	0.000701757	-1.20617	-1.93181	0.0792156	0.203041	0.156157	5.01354	4.88324	5.06477	4.54701	4.62382	4.84205	4.7263	4.36967	3.88398	4.16729	4.09963
76594_at	76594	202052	Dnajc18	DnaJ (Hsp40) homolog, subfamily C, member 18	GO:0005575: cellular_component, GO:0006457: protein folding, GO:0008150: biological_process, GO:0016020: membrane, GO:0016021: integral to membrane, GO:0031072: heat shock protein binding, GO:0051082: unfolded protein binding		2.37016	0.0299754	0.0635992	0.0510569	-1.23427	0.234024	0.602043	0.541167	2.92937	0.00984976	0.343228	0.278077	-1.33729	-2.7033	0.0214657	0.361916	0.264031	1.07331	0.954888	0.361152	0.703782	0.67244	-1.01755	-0.190245	0.852982	0.894614	0.884958	1.41057	4.01362	0.0019891	0.0171351	0.0106559	5.85591	6.11768	5.76478	5.57701	5.28066	5.62221	5.50225	6.14819	5.71233	5.7865	5.8966
24110_at	24110	11274	Usp18	ubiquitin specific peptidase 18	GO:0004221: ubiquitin thiolesterase activity, GO:0005634: nucleus, GO:0006508: proteolysis, GO:0006511: ubiquitin-dependent protein catabolic process, GO:0008233: peptidase activity, GO:0008234: cysteine-type peptidase activity, GO:0016787: hydrolase activity, GO:0019785: ISG15-specific protease activity, GO:0032020: ISG15-protein conjugation		-2.89362	0.0101584	0.0272723	0.0201375	3.61068	0.00218147	0.122192	0.0838342	2.92824	0.00987279	0.343228	0.278077	1.25571	0.873169	0.402263	0.8202	0.758676	3.46057	5.91894	0.000122248	0.03583	0.0229547	-3.10708	-6.94231	4.30756e-05	0.000789645	0.00047262	-1.12744	-0.534532	0.603481	0.741848	0.704336	6.2194	5.23595	5.64541	5.7079	5.2957	6.22716	6.71689	4.41304	3.77655	4.25558	3.95584
18791_at	18791	5327	Plat	plasminogen activator, tissue	GO:0001666: response to hypoxia, GO:0003824: catalytic activity, GO:0004252: serine-type endopeptidase activity, GO:0004252: serine-type endopeptidase activity, GO:0005576: extracellular region, GO:0005615: extracellular space, GO:0005615: extracellular space, GO:0005737: cytoplasm, GO:0005737: cytoplasm, GO:0006508: proteolysis, GO:0008152: metabolic process, GO:0008233: peptidase activity, GO:0…	04610: Complement and coagulation cascades	2.68733	0.0156573	0.0381262	0.0291034	-3.85732	0.00127945	0.098525	0.0649093	2.92794	0.0098791	0.343228	0.278077	-3.32476	-4.85847	0.000590448	0.153431	0.0962495	-1.36248	-2.10927	0.0598866	0.441586	0.390899	-1.03483	0.0561184	0.95637	0.969213	0.965811	2.3581	5.09881	0.000331551	0.00504655	0.0030548	7.80413	7.22601	8.58843	5.58229	5.77164	6.57538	6.72967	7.46658	8.19116	8.27725	7.62524
20451_at	20451	51046	St8sia3	ST8 alpha-N-acetyl-neuraminide alpha-2,8-sialyltransferase 3	GO:0001574: ganglioside biosynthetic process, GO:0003828: alpha-N-acetylneuraminate alpha-2,8-sialyltransferase activity, GO:0003828: alpha-N-acetylneuraminate alpha-2,8-sialyltransferase activity, GO:0005794: Golgi apparatus, GO:0006486: protein glycosylation, GO:0006491: N-glycan processing, GO:0008373: sialyltransferase activity, GO:0009100: glycoprotein metabolic process, GO:0009311: oligosac…		-3.79169	0.00147458	0.00592604		-1.09156	0.290373	0.651981		2.92761	0.00988588	0.343228		-1.3141	-2.42287	0.0349924	0.429747		1.09051	1.27945	0.228352	0.611128		-1.63326	-6.21122	0.000106854	0.00141014		-1.13972	-1.16409	0.26872	0.446084		2.81688	2.70671	2.68669	2.22591	2.0076	2.43851	2.62897	2.21042	2.01727	1.91821	1.95683
78444_at	78444	145814	Pgpep1l	pyroglutamyl-peptidase I-like	GO:0003674: molecular_function, GO:0005575: cellular_component, GO:0006508: proteolysis, GO:0008150: biological_process, GO:0008233: peptidase activity, GO:0008234: cysteine-type peptidase activity, GO:0016787: hydrolase activity		-4.39013	0.000406473	0.00209216		-0.607215	0.551796	0.817155		2.92488	0.00994199	0.343577		-1.34921	-2.24274	0.0477776	0.467126		1.17792	1.98356	0.0741281	0.462506		-2.02741	-7.75769	1.68568e-05	0.000443249		-1.27569	-1.67477	0.1218	0.267967		3.35489	3.52735	3.60547	2.95612	2.69852	2.84864	3.59442	2.64867	2.42886	2.23343	2.57487
14870_at	14870	2950	Gstp1	glutathione S-transferase, pi 1	GO:0000302: response to reactive oxygen species, GO:0002674: negative regulation of acute inflammatory response, GO:0004364: glutathione transferase activity, GO:0004364: glutathione transferase activity, GO:0005622: intracellular, GO:0005622: intracellular, GO:0005634: nucleus, GO:0005737: cytoplasm, GO:0005739: mitochondrion, GO:0006469: negative regulation of protein kinase activity, GO:000674…	00480: Glutathione metabolism, 00980: Metabolism of xenobiotics by cytochrome P450, 00982: Drug metabolism - cytochrome P450, 05215: Prostate cancer	0.137662	0.892138	0.920013	0.91429	-2.27205	0.0364664	0.314755	0.246422	2.92462	0.00994727	0.343577	0.2785	-1.44252	-3.53463	0.00508251	0.254186	0.169425	1.00586	-0.0271516	0.978849	0.992782	0.991638	-1.20779	-2.25358	0.0482814	0.10836	0.086971	1.20135	1.81926	0.0958341	0.229816	0.180269	7.68614	7.98856	7.68013	7.25485	7.40145	7.27225	7.11167	7.48531	7.48919	7.48628	7.61458
100861878_at	100861878		LOC100861878	uncharacterized LOC100861878			3.17328	0.00560055	0.0171653	0.0122031	-1.60842	0.126299	0.484681	0.415648	2.92447	0.00995046	0.343577	0.2785	-1.55639	-3.12146	0.0103538	0.295225	0.209535	1.05739	0.708175	0.494294	0.782198	0.758234	1.07389	0.515884	0.61732	0.708794	0.687022	1.76731	4.7169	0.000611671	0.00760246	0.00465309	4.37761	4.7052	4.65944	3.91073	4.0119	4.33669	3.38222	4.76389	4.24101	4.73512	4.93496
100038967_at	100038967		Gm1988	predicted gene 1988	GO:0003674: molecular_function, GO:0005575: cellular_component, GO:0008150: biological_process		-1.29261	0.213574	0.298886		-0.109389	0.914185	0.971006		2.92337	0.00997318	0.343891		-1.25445	-1.94282	0.0795595	0.541282		1.19299	2.06056	0.0650675	0.450451		-1.37935	-3.21631	0.00941294	0.0333234		1.08497	0.801021	0.439875	0.608734		1.40888	0.881184	1.10521	0.700563	0.748105	0.898687	0.924078	0.547441	0.769832	0.667736	0.741206
78177_at	78177	22981	Ninl	ninein-like	GO:0005509: calcium ion binding, GO:0005737: cytoplasm, GO:0005856: cytoskeleton, GO:0005874: microtubule, GO:0008150: biological_process		-2.05103	0.0561309	0.103948	0.0872887	-0.336715	0.740485	0.907056	0.88396	2.91967	0.0100501	0.345225	0.279738	-1.29942	-2.02168	0.06967	0.527369	0.41572	1.19923	2.23542	0.0482332	0.421084	0.368026	-1.55038	-4.90072	0.000651235	0.00492648	0.00304553	1.00511	0.147565	0.885323	0.931285	0.919992	5.30444	4.92364	5.27762	4.47667	4.74593	5.21888	4.65276	4.43756	4.58654	4.51453	4.6378
68035_at	68035	79171	Rbm42	RNA binding motif protein 42	GO:0000166: nucleotide binding, GO:0003676: nucleic acid binding, GO:0003723: RNA binding, GO:0005634: nucleus, GO:0005737: cytoplasm		-1.72136	0.103473	0.168463	0.147959	-0.668639	0.512773	0.797349	0.755729	2.91871	0.0100701	0.345343	0.279738	-1.23775	-2.12907	0.0580533	0.496614	0.384821	1.10753	1.46774	0.17155	0.564836	0.521321	-1.32601	-3.44799	0.00638975	0.0252445	0.0172588	1.03381	0.397237	0.6987	0.809463	0.780108	6.32022	6.03795	6.14855	5.83318	5.7796	6.03351	5.80287	5.61134	5.80492	5.80491	5.83423
13855_at	13855	22905	Epn2	epsin 2	GO:0001701: in utero embryonic development, GO:0005737: cytoplasm, GO:0006897: endocytosis, GO:0007219: Notch signaling pathway, GO:0008289: lipid binding, GO:0030100: regulation of endocytosis, GO:0030128: clathrin coat of endocytic vesicle, GO:0048568: embryonic organ development	04144: Endocytosis	-2.40321	0.0280441	0.0603604	0.0481601	-0.240997	0.812462	0.934691	0.919654	2.91688	0.0101085	0.345718	0.279756	-1.18863	-1.73126	0.112886	0.594605	0.487497	1.12685	1.93164	0.0808914	0.474295	0.425262	-1.35376	-3.77868	0.00371014	0.016997	0.0112664	-1.01071	-0.127526	0.900798	0.940187	0.930273	6.47763	6.45128	6.19939	6.04212	6.06466	6.19293	6.22049	5.89764	5.88183	6.02629	5.96748
110596_at	110596	64283	Rgnef	Rho-guanine nucleotide exchange factor	GO:0003723: RNA binding, GO:0005085: guanyl-nucleotide exchange factor activity, GO:0005089: Rho guanyl-nucleotide exchange factor activity, GO:0005515: protein binding, GO:0005543: phospholipid binding, GO:0005622: intracellular, GO:0005737: cytoplasm, GO:0005886: plasma membrane, GO:0015630: microtubule cytoskeleton, GO:0016020: membrane, GO:0021955: central nervous system neuron axonogenesis, …		-2.08278	0.0528089	0.0990918	0.0828873	-2.62752	0.017726	0.243223	0.182984	2.91569	0.0101334	0.346101	0.279923	-1.48774	-3.68951	0.00390761	0.238273	0.156663	-1.02338	-0.374944	0.715182	0.89439	0.882981	-1.43867	-5.1081	0.00048141	0.00397069	0.00243562	1.01048	0.111619	0.913112	0.947819	0.938677	7.07574	7.00713	7.10123	6.29017	6.28323	6.57736	6.74952	6.50268	6.51206	6.49561	6.6338
100216533_at	100216533		Snord55	small nucleolar RNA, C/D box 55	GO:0003674: molecular_function, GO:0005575: cellular_component, GO:0008150: biological_process		-0.603001	0.55453	0.637747	0.620355	-0.433106	0.670425	0.876734	0.846546	2.91006	0.0102525	0.34828	0.281118	-1.30783	-1.96466	0.0766959	0.535222	0.425635	1.17793	2.49194	0.0309074	0.390888	0.334023	-1.352	-3.07273	0.0119929	0.0397389	0.0284688	1.13945	1.31643	0.214478	0.386785	0.330483	11.8168	11.437	11.3388	10.834	10.8779	11.5104	11.2996	11.2583	11.0824	11.0363	11.0554
545700_at	545700		Smarca5-ps	SWI/SNF related, matrix associated, actin depenent ragulator of chromatin, subfamily a, member 5, pseudogene			-1.31286	0.206812	0.291436		-0.66235	0.516696	0.799278		2.90846	0.0102864	0.348348		-1.55453	-2.75349	0.0196641	0.351275		1.26425	1.52289	0.157389	0.54936		-1.69824	-3.78153	0.00369299	0.0169425		1.15727	0.811212	0.434239	0.604152		1.86287	0.940688	1.37128	0.903062	0.914421	0.487513	0.870333	0.612885	0.620034	0.679976	0.787056
66141_at	66141	10410	Ifitm3	interferon induced transmembrane protein 3	GO:0005764: lysosome, GO:0005768: endosome, GO:0005783: endoplasmic reticulum, GO:0005886: plasma membrane, GO:0008285: negative regulation of cell proliferation, GO:0009607: response to biotic stimulus, GO:0016020: membrane, GO:0016021: integral to membrane, GO:0016023: cytoplasmic membrane-bounded vesicle, GO:0051607: defense response to virus, GO:0051607: defense response to virus, GO:0060337:…		6.66734	4.12978e-06	5.31098e-05	3.18405e-05	0.197845	0.845531	0.946678	0.933786	2.90612	0.0103365	0.348348	0.281304	-1.16282	-1.49569	0.16442	0.654019	0.555602	1.15915	2.28961	0.0439263	0.417349	0.361199	1.27724	2.97351	0.0141889	0.0447842	0.0324713	1.72157	7.01656	2.08138e-05	0.000854449	0.000508651	9.50066	9.22733	9.18601	9.11997	9.05655	9.03752	9.15841	9.57216	9.78854	9.65538	9.63354
100213_at	100213	9853	Rusc2	RUN and SH3 domain containing 2	GO:0003674: molecular_function, GO:0005575: cellular_component, GO:0008150: biological_process		1.12016	0.278341	0.369285	0.345574	-0.64522	0.527464	0.805017	0.764177	2.90603	0.0103385	0.348348	0.281304	-1.21044	-2.07446	0.0637093	0.513545	0.40079	1.10013	1.37694	0.197245	0.588256	0.546188	-1.09086	-1.21571	0.252439	0.364223	0.333453	1.22074	2.38468	0.0359434	0.120928	0.0869087	4.82457	4.8689	4.91752	4.47396	4.63207	4.68919	4.5773	4.82581	4.7877	4.70215	4.6598
78929_at	78929	171568	Polr3h	polymerase (RNA) III (DNA directed) polypeptide H	GO:0003677: DNA binding, GO:0003899: DNA-directed RNA polymerase activity, GO:0005634: nucleus, GO:0005654: nucleoplasm, GO:0005666: DNA-directed RNA polymerase III complex, GO:0006139: nucleobase-containing compound metabolic process, GO:0006351: transcription, DNA-dependent, GO:0006383: transcription from RNA polymerase III promoter, GO:0009615: response to virus, GO:0045087: innate immune resp…	00230: Purine metabolism, 00240: Pyrimidine metabolism, 01100: Metabolic pathways, 03020: RNA polymerase, 04623: Cytosolic DNA-sensing pathway	3.37684	0.00361524	0.0122054	0.00845742	-2.59967	0.0187758	0.248218	0.18653	2.90586	0.0103421	0.348348	0.281304	-1.42346	-3.31713	0.00737992	0.273155	0.188611	-1.02438	-0.372123	0.71722	0.895509	0.884214	1.04914	0.616727	0.551407	0.65124	0.627027	1.45786	4.41196	0.00101195	0.0106904	0.00656661	5.91113	5.74117	5.53967	5.09879	5.30191	5.11608	5.37999	5.70191	5.84606	5.89734	5.7785
223435_at	223435	7204	Trio	triple functional domain (PTPRF interacting)	GO:0000166: nucleotide binding, GO:0004672: protein kinase activity, GO:0004674: protein serine/threonine kinase activity, GO:0005085: guanyl-nucleotide exchange factor activity, GO:0005089: Rho guanyl-nucleotide exchange factor activity, GO:0005524: ATP binding, GO:0005543: phospholipid binding, GO:0005622: intracellular, GO:0005737: cytoplasm, GO:0006468: protein phosphorylation, GO:0016301: ki…		-1.1356	0.272004	0.362653	0.338896	-2.31531	0.0334577	0.303248	0.236564	2.90513	0.0103577	0.348348	0.281304	-1.46103	-3.13905	0.0100425	0.291034	0.207247	-1.00708	-0.101289	0.921234	0.973979	0.971741	-1.34867	-3.77159	0.0037531	0.017144	0.0113689	1.07569	0.820399	0.429199	0.600421	0.550327	7.13921	7.01734	7.27174	6.33114	6.3322	6.91577	6.72887	6.84932	6.69503	6.66191	6.64433
19062_at	19062	51763	Inpp5k	inositol polyphosphate 5-phosphatase K	GO:0001701: in utero embryonic development, GO:0001726: ruffle, GO:0001933: negative regulation of protein phosphorylation, GO:0004445: inositol-polyphosphate 5-phosphatase activity, GO:0005000: vasopressin receptor activity, GO:0005634: nucleus, GO:0005737: cytoplasm, GO:0005783: endoplasmic reticulum, GO:0005783: endoplasmic reticulum, GO:0005802: trans-Golgi network, GO:0005829: cytosol, GO:00…	00562: Inositol phosphate metabolism, 01100: Metabolic pathways, 04070: Phosphatidylinositol signaling system, 04910: Insulin signaling pathway	-2.79036	0.0126253	0.0321611	0.0241751	-0.910702	0.375284	0.714566	0.664078	2.90448	0.0103717	0.348348	0.281304	-1.25563	-2.35821	0.0391436	0.444062	0.33392	1.08578	1.18617	0.261764	0.638168	0.59837	-1.41969	-4.23038	0.00180377	0.0101873	0.00652136	-1.04132	-0.439562	0.668662	0.788063	0.756824	6.57393	6.58908	6.63301	6.21237	6.21237	6.48473	6.14838	6.3386	5.99183	6.00334	6.00877
17701_at	17701	4487	Msx1	homeobox, msh-like 1	GO:0000122: negative regulation of transcription from RNA polymerase II promoter, GO:0000122: negative regulation of transcription from RNA polymerase II promoter, GO:0000902: cell morphogenesis, GO:0000982: RNA polymerase II core promoter proximal region sequence-specific DNA binding transcription factor activity, GO:0001701: in utero embryonic development, GO:0001837: epithelial to mesenchymal …		-0.661113	0.51747	0.604586	0.586144	-2.96934	0.00865334	0.19558	0.139641	2.90251	0.0104142	0.348348	0.281304	-1.86402	-4.3365	0.00134262	0.18216	0.119185	-1.08952	-0.748806	0.470455	0.769937	0.744204	-1.44362	-2.66152	0.0241343	0.0655951	0.049517	1.18512	1.52734	0.154564	0.313192	0.258206	6.65019	6.12082	6.7933	5.34508	5.53909	5.66978	5.97518	5.5829	6.09978	6.16794	6.15108
23961_at	23961		Oas1b	2'-5' oligoadenylate synthetase 1B	GO:0003725: double-stranded RNA binding, GO:0009615: response to virus	05160: Hepatitis C	-5.73375	2.50953e-05	0.000216553	0.000131033	3.23423	0.004914	0.162336	0.113888	2.9018	0.0104295	0.348348	0.281304	1.10669	0.49607	0.630151	0.915687	0.88054	2.44769	6.13085	9.12624e-05	0.0306715	0.0193262	-3.8727	-8.70187	6.2094e-06	0.000241907	0.000143028	-1.75099	-3.04619	0.0109779	0.054979	0.0363091	6.02495	5.05403	5.80049	5.25982	5.46173	6.17939	6.17967	3.71938	3.42451	3.81014	3.9174
74152_at	74152		1300002K09Rik	RIKEN cDNA 1300002K09 gene	GO:0003674: molecular_function, GO:0005575: cellular_component, GO:0008150: biological_process		-3.94793	0.00105192	0.0045216	0.00294975	-1.12134	0.277857	0.640773	0.582411	2.90158	0.0104344	0.348348	0.281304	-1.5554	-2.70219	0.0215074	0.362135	0.264107	1.13626	1.36549	0.200704	0.590654	0.548296	-2.26663	-6.28861	9.67453e-05	0.00132315	0.000797289	-1.28251	-1.50358	0.160506	0.320936	0.265611	5.20435	5.0412	4.62185	3.73115	4.22333	4.85152	4.32977	3.74763	3.96688	3.37315	4.00992
70533_at	70533	91408	Btf3l4	basic transcription factor 3-like 4	GO:0003674: molecular_function, GO:0005575: cellular_component, GO:0008150: biological_process		0.597051	0.558403	0.640798	0.623465	-2.3426	0.0316804	0.297739	0.232187	2.90082	0.0104507	0.348348	0.281304	-1.5224	-3.40369	0.00635888	0.269381	0.182805	-1.00498	-0.122838	0.904561	0.968447	0.96526	-1.19485	-2.15726	0.056784	0.121854	0.0989816	1.26783	2.13238	0.0560472	0.162121	0.121002	5.78469	6.07928	5.87489	5.15481	5.73491	5.14989	5.1089	5.64424	5.75793	5.7	5.53426
11640_at	11640	8165	Akap1	A kinase (PRKA) anchor protein 1	GO:0003723: RNA binding, GO:0005739: mitochondrion, GO:0005739: mitochondrion, GO:0005741: mitochondrial outer membrane, GO:0005743: mitochondrial inner membrane, GO:0005759: mitochondrial matrix, GO:0005783: endoplasmic reticulum, GO:0005811: lipid particle, GO:0008017: microtubule binding, GO:0010614: negative regulation of cardiac muscle hypertrophy, GO:0016020: membrane, GO:0016021: integral …		-1.90234	0.0743428	0.129475	0.110991	-3.31986	0.0040875	0.152863	0.106988	2.89825	0.0105067	0.348348	0.281304	-1.74081	-4.29533	0.0014348	0.182325	0.119222	-1.10701	-1.15246	0.274756	0.64842	0.609041	-1.53949	-4.65722	0.000935935	0.00639848	0.00398727	1.02146	0.258423	0.800794	0.879819	0.85955	6.87453	6.54974	6.77426	5.56157	5.72649	6.15338	6.21165	5.86591	6.25952	6.15343	6.15892
676676_at	676676		F530104D19Rik	RIKEN cDNA F530104D19 gene	GO:0003674: molecular_function, GO:0005575: cellular_component, GO:0008150: biological_process		-1.81355	0.0875787	0.147561		0.337314	0.740042	0.906944		2.89766	0.0105196	0.348348		-1.16281	-1.42203	0.184279	0.675213		1.17871	2.48783	0.0311294	0.392127		-1.33264	-3.23413	0.0091351	0.0326008		1.0285	0.335131	0.743754	0.841543		2.37823	1.96726	2.25432	1.95942	1.96961	2.01746	2.022	1.69544	1.84815	1.84815	1.78576
723901_at	723901		Mir542	microRNA 542	GO:0060218: hemopoietic stem cell differentiation		-1.4577	0.163291	0.24207	0.219322	0.426165	0.675376	0.879088	0.8491	2.89688	0.0105366	0.348348	0.281304	-1.20773	-1.53947	0.153515	0.643628	0.543104	1.2648	2.8051	0.0178711	0.358105	0.304521	-1.43824	-3.6243	0.0047748	0.0204718	0.0137533	1.06209	0.642277	0.533691	0.687917	0.645372	3.66161	3.55346	3.94661	3.50262	3.03965	3.62747	3.58966	3.34489	3.15193	2.94503	3.34489
72960_at	72960	116447	Top1mt	DNA topoisomerase 1, mitochondrial	GO:0000166: nucleotide binding, GO:0003677: DNA binding, GO:0003916: DNA topoisomerase activity, GO:0003917: DNA topoisomerase type I activity, GO:0003918: DNA topoisomerase (ATP-hydrolyzing) activity, GO:0005524: ATP binding, GO:0005694: chromosome, GO:0005739: mitochondrion, GO:0005739: mitochondrion, GO:0006260: DNA replication, GO:0006265: DNA topological change, GO:0016853: isomerase activit…		4.55497	0.000286055	0.00157806	0.000989045	-1.82501	0.0857618	0.42287	0.353976	2.89341	0.0106126	0.348348	0.281304	-1.37126	-2.98155	0.0132073	0.314828	0.224488	1.02715	0.389525	0.704691	0.889034	0.877477	1.15453	1.65022	0.130385	0.22348	0.194934	1.62614	5.33003	0.000231139	0.00393123	0.00237775	4.42403	4.62383	4.41304	4.00648	4.28698	3.98245	3.82389	4.49669	4.64702	4.84089	4.78163
53856_at	53856	10394	Prg3	proteoglycan 3	GO:0001694: histamine biosynthetic process, GO:0006955: immune response, GO:0017148: negative regulation of translation, GO:0019370: leukotriene biosynthetic process, GO:0030246: carbohydrate binding, GO:0042119: neutrophil activation, GO:0042554: superoxide anion generation, GO:0045416: positive regulation of interleukin-8 biosynthetic process, GO:0045575: basophil activation		-2.89789	0.0100672	0.0270914		2.22541	0.0399908	0.324598		2.89282	0.0106255	0.348348		-1.02573	-0.253578	0.804759	0.965114		1.34296	3.92642	0.00259633	0.18969		-1.44104	-4.17084	0.00198059	0.0109216		-1.04612	-0.546901	0.595235	0.735754		2.81459	2.93932	3.07035	2.81241	2.8578	2.89992	3.05259	2.64524	2.34564	2.3812	2.27198
56012_at	56012	5224	Pgam2	phosphoglycerate mutase 2	GO:0003824: catalytic activity, GO:0004082: bisphosphoglycerate mutase activity, GO:0004083: bisphosphoglycerate 2-phosphatase activity, GO:0004619: phosphoglycerate mutase activity, GO:0004619: phosphoglycerate mutase activity, GO:0005634: nucleus, GO:0005829: cytosol, GO:0006094: gluconeogenesis, GO:0006096: glycolysis, GO:0006941: striated muscle contraction, GO:0008152: metabolic process, GO:…	00010: Glycolysis / Gluconeogenesis, 01100: Metabolic pathways	-1.79197	0.0910946	0.152356		0.485156	0.633807	0.859387		2.89197	0.0106443	0.348348		-1.17252	-1.66476	0.125729	0.611682		1.22828	2.22922	0.0487513	0.421842		-1.38714	-3.64479	0.00461685	0.0199439		1.03824	0.352425	0.731099	0.832268		2.63444	2.78826	2.7983	2.6093	2.45971	2.37576	2.59297	1.99606	2.34255	2.45555	2.24748
67488_at	67488	57658	Calcoco1	calcium binding and coiled coil domain 1	GO:0000790: nuclear chromatin, GO:0003682: chromatin binding, GO:0003712: transcription cofactor activity, GO:0003713: transcription coactivator activity, GO:0003713: transcription coactivator activity, GO:0005515: protein binding, GO:0005634: nucleus, GO:0005634: nucleus, GO:0005737: cytoplasm, GO:0006351: transcription, DNA-dependent, GO:0007165: signal transduction, GO:0008013: beta-catenin bi…		-5.16572	7.95149e-05	0.000558641	0.000341521	-0.748977	0.464189	0.766683	0.722916	2.89034	0.0106803	0.348348	0.281304	-1.4351	-2.74856	0.0198343	0.351275	0.255846	1.15474	1.4227	0.183916	0.575694	0.531477	-2.38542	-6.72954	5.57279e-05	0.000934893	0.000561781	-1.43946	-2.72029	0.0197237	0.0811285	0.0555183	7.31396	7.26727	7.34107	6.54804	6.30583	7.09525	7.04635	6.5461	5.62339	5.85259	6.0256
17259_at	17259	100271849	Mef2b	myocyte enhancer factor 2B	GO:0003700: sequence-specific DNA binding transcription factor activity, GO:0005634: nucleus, GO:0005634: nucleus, GO:0006355: regulation of transcription, DNA-dependent		-2.54843	0.020864	0.0478064		0.156138	0.877778	0.958841		2.88853	0.0107205	0.348348		-1.20994	-1.52432	0.157214	0.647083		1.19375	2.83128	0.0170701	0.356044		-1.48392	-3.84987	0.0033058	0.0156834		-1.02738	-0.285616	0.780414	0.865502		2.97625	3.41661	3.53085	3.08822	2.9614	3.23314	2.90299	2.79148	2.81846	2.66224	2.75344
74168_at	74168	84287	Zdhhc16	zinc finger, DHHC domain containing 16	GO:0003674: molecular_function, GO:0005575: cellular_component, GO:0005783: endoplasmic reticulum, GO:0006915: apoptotic process, GO:0008150: biological_process, GO:0008152: metabolic process, GO:0008270: zinc ion binding, GO:0016020: membrane, GO:0016021: integral to membrane, GO:0016740: transferase activity, GO:0016746: transferase activity, transferring acyl groups, GO:0046872: metal ion bind…		2.49447	0.0233006	0.0521686	0.041089	-1.80264	0.089342	0.428589	0.359956	2.88768	0.0107392	0.348348	0.281304	-1.38389	-3.15494	0.00976931	0.285462	0.203056	1.02613	0.38313	0.709284	0.891504	0.879863	-1.00022	-0.0815821	0.936613	0.955646	0.950518	1.41973	3.85801	0.00260337	0.0204611	0.0128294	5.68501	5.61045	5.70063	5.39947	5.29901	4.96977	5.08024	5.359	5.70007	5.85339	5.7057
252838_at	252838	9760	Tox	thymocyte selection-associated high mobility group box	GO:0003677: DNA binding, GO:0005634: nucleus		-0.134414	0.894666	0.921726	0.916222	-0.768	0.453106	0.761365	0.716914	2.88759	0.0107413	0.348348	0.281304	-1.31917	-2.53779	0.0286524	0.402347	0.29516	1.12023	1.2922	0.224069	0.608527	0.566836	-1.24532	-2.03497	0.0696648	0.141572	0.116888	1.18666	1.92569	0.080047	0.204486	0.157378	3.7231	4.13757	3.7231	3.42038	3.52507	3.5298	3.42182	3.81979	3.44358	3.34584	3.57953
63873_at	63873	59341	Trpv4	transient receptor potential cation channel, subfamily V, member 4	GO:0003779: actin binding, GO:0005034: osmosensor activity, GO:0005034: osmosensor activity, GO:0005080: protein kinase C binding, GO:0005216: ion channel activity, GO:0005261: cation channel activity, GO:0005262: calcium channel activity, GO:0005262: calcium channel activity, GO:0005515: protein binding, GO:0005516: calmodulin binding, GO:0005623: cell, GO:0005881: cytoplasmic microtubule, GO:00…		-2.56533	0.0201519	0.0465411	0.0362388	-2.94427	0.009126	0.199269	0.14269	2.88734	0.0107468	0.348348	0.281304	-1.74854	-4.77923	0.000667226	0.162341	0.10133	-1.05247	-0.631079	0.541514	0.811894	0.789958	-1.70115	-6.89655	4.55072e-05	0.000824626	0.00049346	-1.02395	-0.250829	0.806514	0.883034	0.862864	5.24666	5.26049	5.37804	4.23217	4.72449	4.69715	4.22659	4.36112	4.59967	4.54693	4.59837
216867_at	216867	162515	Slc16a11	solute carrier family 16 (monocarboxylic acid transporters), member 11	GO:0003674: molecular_function, GO:0005575: cellular_component, GO:0005886: plasma membrane, GO:0006810: transport, GO:0008150: biological_process, GO:0015293: symporter activity, GO:0016020: membrane, GO:0016021: integral to membrane, GO:0055085: transmembrane transport		-4.95195	0.000123931	0.000800568	0.000492604	-2.41049	0.0276347	0.284078	0.219333	2.88574	0.0107826	0.348348	0.281304	-1.54227	-3.29793	0.0076283	0.274566	0.190763	-1.01286	-0.222162	0.82846	0.940459	0.935352	-1.92688	-6.1832	0.00011079	0.00144394	0.000871403	-1.26545	-2.36595	0.0371584	0.123694	0.0890624	4.03622	4.18653	3.5768	3.11933	3.509	3.16612	3.48424	3.01371	3.06119	2.9062	3.05134
54698_at	54698	56253	Crtam	cytotoxic and regulatory T cell molecule	GO:0002355: detection of tumor cell, GO:0002860: positive regulation of natural killer cell mediated cytotoxicity directed against tumor cell target, GO:0005102: receptor binding, GO:0005886: plasma membrane, GO:0005887: integral to plasma membrane, GO:0008037: cell recognition, GO:0016020: membrane, GO:0016021: integral to membrane, GO:0045954: positive regulation of natural killer cell mediated…		-1.5907	0.130244	0.201828		0.332667	0.743485	0.908615		2.88568	0.0107838	0.348348		-1.22726	-1.7445	0.110473	0.59069		1.27213	2.36951	0.0382475	0.408768		-1.46449	-3.97047	0.00272272	0.0136902		1.06606	0.508162	0.621254	0.754587		2.82998	3.27944	3.14084	2.65369	3.06551	2.67049	2.77106	2.69101	2.38597	2.57333	2.51299
18214_at	18214	4921	Ddr2	discoidin domain receptor family, member 2	GO:0000166: nucleotide binding, GO:0001503: ossification, GO:0003416: endochondral bone growth, GO:0004672: protein kinase activity, GO:0004713: protein tyrosine kinase activity, GO:0004714: transmembrane receptor protein tyrosine kinase activity, GO:0005518: collagen binding, GO:0005524: ATP binding, GO:0005886: plasma membrane, GO:0006468: protein phosphorylation, GO:0007155: cell adhesion, GO:…		4.00872	0.000922518	0.00406237	0.00264386	-2.12364	0.048798	0.348443	0.27959	2.8845	0.0108103	0.348348	0.281304	-1.50502	-3.23156	0.00855514	0.278971	0.197367	1.00745	0.113178	0.912029	0.971299	0.968366	1.13974	1.46758	0.173421	0.275008	0.245353	1.72811	4.80257	0.00053222	0.00694006	0.00423095	7.85735	7.69903	7.64337	6.99122	6.71103	7.44979	7.32051	8.00014	7.78241	7.77881	8.10964
14221_at	14221	24147	Fjx1	four jointed box 1 (Drosophila)	GO:0005576: extracellular region, GO:0005615: extracellular space		2.94842	0.00904601	0.0249141	0.0182545	-1.91865	0.0721146	0.399233	0.329439	2.88357	0.0108311	0.348348	0.281304	-1.73867	-4.34449	0.00132546	0.18216	0.119185	1.07321	0.259742	0.800097	0.9296	0.923792	1.03993	0.415945	0.68637	0.767077	0.748263	1.94047	4.09752	0.00172241	0.0154998	0.00961618	5.13875	5.33505	4.83589	4.03404	4.15463	4.57358	4.45089	5.37631	5.15585	5.19045	4.94093
100217453_at	100217453		Snord16a	small nucleolar RNA, C/D box 16A	GO:0003674: molecular_function, GO:0005575: cellular_component, GO:0008150: biological_process		-0.54638	0.59196	0.67163	0.65482	-0.483146	0.635204	0.860387	0.825966	2.88164	0.0108745	0.348348	0.281304	-1.33355	-2.01841	0.0700552	0.527797	0.41572	1.19664	2.5945	0.0258381	0.378564	0.321493	-1.38841	-3.87454	0.00317665	0.0152486	0.0100303	1.14935	1.26656	0.23116	0.40533	0.349259	10.9962	10.7705	10.948	10.127	9.9666	10.8964	10.764	10.6164	10.4739	10.2868	10.3387
234356_at	234356	55790	Csgalnact1	chondroitin sulfate N-acetylgalactosaminyltransferase 1	GO:0001958: endochondral ossification, GO:0005794: Golgi apparatus, GO:0008152: metabolic process, GO:0008376: acetylgalactosaminyltransferase activity, GO:0008955: peptidoglycan glycosyltransferase activity, GO:0015020: glucuronosyltransferase activity, GO:0016020: membrane, GO:0016021: integral to membrane, GO:0016740: transferase activity, GO:0016758: transferase activity, transferring hexosyl…	00532: Glycosaminoglycan biosynthesis - chondroitin sulfate, 01100: Metabolic pathways	-3.67725	0.00188886	0.00722796	0.00485604	-1.33091	0.200931	0.568871	0.505102	2.88111	0.0108863	0.348348	0.281304	-1.54426	-2.94807	0.0140009	0.32058	0.228722	1.1021	0.984902	0.346876	0.694796	0.66188	-2.08096	-6.38932	8.51073e-05	0.00122095	0.000734428	-1.22271	-1.21464	0.249629	0.425634	0.369634	4.83651	4.87906	4.55377	3.63386	3.90989	4.13216	4.66535	3.77674	3.40899	3.50023	4.05019
17385_at	17385	4320	Mmp11	matrix metallopeptidase 11	GO:0004222: metalloendopeptidase activity, GO:0005509: calcium ion binding, GO:0005576: extracellular region, GO:0005578: proteinaceous extracellular matrix, GO:0006508: proteolysis, GO:0008233: peptidase activity, GO:0008237: metallopeptidase activity, GO:0008270: zinc ion binding, GO:0016787: hydrolase activity, GO:0030574: collagen catabolic process, GO:0031012: extracellular matrix, GO:004687…		-4.81247	0.000165986	0.00101328	0.000626524	-2.15413	0.0459883	0.341438	0.271356	2.88036	0.0109034	0.348348	0.281304	-2.87328	-3.26111	0.00812906	0.277415	0.195124	1.04266	0.142174	0.889641	0.964215	0.96087	-6.913	-10.3515	1.31229e-06	0.000101304	5.97976e-05	-2.30753	-2.09176	0.060151	0.169841	0.127633	8.62899	7.39053	8.52101	5.21645	5.80782	7.58157	7.2026	5.61979	5.39727	5.54884	5.37304
80982_at	80982	57214	9930013L23Rik	RIKEN cDNA 9930013L23 gene	GO:0003674: molecular_function, GO:0005737: cytoplasm, GO:0008150: biological_process		-2.83031	0.0116091	0.0301358	0.0225022	-0.26479	0.79438	0.927632	0.910019	2.88033	0.010904	0.348348	0.281304	-1.3671	-2.49636	0.030796	0.410168	0.303291	1.27268	1.74991	0.109323	0.502488	0.453799	-1.84313	-6.30187	9.51191e-05	0.00130955	0.000788765	-1.05934	-0.475498	0.643622	0.770878	0.737314	4.14777	4.09574	3.80236	3.15256	3.55134	3.63667	3.85963	3.17512	3.32996	2.88703	3.13724
432800_at	432800		Gm5454	predicted gene 5454	GO:0003674: molecular_function, GO:0003677: DNA binding, GO:0005575: cellular_component, GO:0005634: nucleus, GO:0008150: biological_process		-1.42402	0.172678	0.253098		0.965793	0.347792	0.693622		2.87929	0.0109274	0.348359		-1.24356	-1.68298	0.122085	0.606083		1.57413	2.66275	0.02293	0.374322		-1.71771	-3.87085	0.00319563	0.015303		1.13962	0.710894	0.49177	0.654202		2.95862	2.52197	2.84369	2.11084	2.63313	2.77211	2.27377	2.35461	1.43969	1.90537	2.16723
11870_at	11870	417	Art1	ADP-ribosyltransferase 1	GO:0003950: NAD+ ADP-ribosyltransferase activity, GO:0003956: NAD(P)+-protein-arginine ADP-ribosyltransferase activity, GO:0006471: protein ADP-ribosylation, GO:0008152: metabolic process, GO:0009986: cell surface, GO:0016020: membrane, GO:0016529: sarcoplasmic reticulum, GO:0016740: transferase activity, GO:0016757: transferase activity, transferring glycosyl groups, GO:0031225: anchored to memb…		-2.29686	0.0347115	0.0712897		0.715139	0.484305	0.779129		2.87827	0.0109507	0.348359		-1.16328	-1.30295	0.220675	0.712928		1.29885	3.20516	0.00888807	0.306474		-1.54491	-4.90703	0.000645221	0.00488979		-1.02249	-0.059869	0.953321	0.972417		3.58076	3.66957	3.43702	3.09552	3.10373	3.30882	3.77179	2.95674	3.06676	2.67722	3.02093
100504512_at	100504512		4930426I24Rik	RIKEN cDNA 4930426I24 gene			-0.282901	0.780695	0.831081	0.819882	1.43318	0.170082	0.537559	0.470012	2.87787	0.0109596	0.348359	0.282249	-1.09391	-0.892519	0.392278	0.814277	0.751502	1.35292	3.19375	0.00906605	0.308209	0.250965	-1.25938	-2.687	0.0231079	0.0636637	0.0479082	1.17516	1.50731	0.159561	0.319807	0.264432	3.46386	3.48709	3.65111	3.14635	3.59391	3.43611	3.4163	3.35778	3.00534	3.10727	3.31543
330578_at	330578		A530021J07Rik	Riken cDNA A530021J07 gene	GO:0003674: molecular_function, GO:0005575: cellular_component, GO:0008150: biological_process		-2.5325	0.0215571	0.0490272	0.0384026	1.27715	0.218849	0.587718	0.524207	2.87594	0.0110036	0.349317	0.282891	-1.09159	-0.873605	0.402036	0.8202	0.758676	1.26605	3.22673	0.00856145	0.302668	0.246606	-1.41314	-4.14515	0.00206247	0.0112209	0.00722594	-1.02253	-0.245323	0.810669	0.885422	0.865826	3.90966	3.96644	4.15376	3.69613	3.85019	3.99534	3.98738	3.61815	3.57699	3.32259	3.5243
320292_at	320292	153020	Rasgef1b	RasGEF domain family, member 1B	GO:0005085: guanyl-nucleotide exchange factor activity, GO:0005088: Ras guanyl-nucleotide exchange factor activity, GO:0005622: intracellular, GO:0005768: endosome, GO:0007264: small GTPase mediated signal transduction, GO:0050790: regulation of catalytic activity, GO:0050790: regulation of catalytic activity, GO:0051056: regulation of small GTPase mediated signal transduction		-6.96055	2.40102e-06	3.52475e-05	2.10874e-05	-0.557874	0.58426	0.83443	0.797324	2.87404	0.0110468	0.349807	0.28351	-1.28565	-2.27464	0.0452239	0.459045	0.347339	1.14223	1.6051	0.13817	0.531954	0.482829	-2.2063	-8.48853	7.72233e-06	0.000274928	0.000162717	-1.50242	-3.84293	0.00267254	0.0208179	0.0130584	5.09615	5.13941	5.0484	4.78896	5.03888	4.43018	4.60107	4.11483	4.05013	3.98019	3.62026
108960_at	108960	3656	Irak2	interleukin-1 receptor-associated kinase 2	GO:0000166: nucleotide binding, GO:0001959: regulation of cytokine-mediated signaling pathway, GO:0004672: protein kinase activity, GO:0005515: protein binding, GO:0005524: ATP binding, GO:0006468: protein phosphorylation, GO:0006915: apoptotic process, GO:0007165: signal transduction, GO:0008152: metabolic process, GO:0009986: cell surface, GO:0016772: transferase activity, transferring phosphor…	04210: Apoptosis, 04722: Neurotrophin signaling pathway	-6.25195	9.08486e-06	9.67849e-05	5.83145e-05	1.64424	0.118634	0.473549	0.403906	2.86935	0.0111547	0.351695	0.285072	-1.1163	-0.976798	0.350822	0.790731	0.721988	1.59064	3.07544	0.0111395	0.32187	0.266458	-2.72189	-9.41051	3.09908e-06	0.000163764	9.67828e-05	-1.5329	-3.26333	0.00743843	0.0422986	0.0273541	6.12711	6.12342	6.488	5.97603	6.2271	5.94818	6.21658	4.74099	4.99944	4.94833	4.50815
70900_at	70900		4921517D22Rik	RIKEN cDNA 4921517D22 gene	GO:0003674: molecular_function, GO:0005575: cellular_component, GO:0008150: biological_process		-2.56349	0.0202283	0.046662		0.917899	0.371611	0.711507		2.86868	0.0111702	0.351695		-1.17047	-1.10496	0.29406	0.765252		1.33437	3.96292	0.00244313	0.184376		-1.63372	-4.30805	0.00159774	0.00925808		-1.04602	-0.307222	0.764343	0.855394		2.89081	3.44322	2.89306	2.9873	2.54615	2.7023	3.1735	2.40844	2.25926	2.28329	2.59183
74288_at	74288	374768	Spem1	sperm maturation 1	GO:0005737: cytoplasm, GO:0007275: multicellular organismal development, GO:0007283: spermatogenesis, GO:0016020: membrane, GO:0016021: integral to membrane, GO:0030154: cell differentiation		-0.479797	0.637534	0.711174		-1.6907	0.109288	0.462832		2.86847	0.0111751	0.351695		-1.53241	-3.26539	0.0080692	0.277339		1.05383	0.513866	0.618011	0.849055		-1.36021	-2.51	0.0312461	0.0788772		1.18724	1.59449	0.13879	0.29175		2.02357	2.41224	2.64712	1.67188	1.56963	2.04228	1.74242	2.00601	2.07521	1.60241	2.02731
627302_at	627302		Gm14092	predicted gene 14092			-3.27436	0.00450798	0.0144971		-0.57871	0.570433	0.826958		2.86842	0.0111762	0.351695		-1.32181	-2.12468	0.0584898	0.4974		1.16654	2.01763	0.0699822	0.45696		-1.73821	-6.28763	9.68662e-05	0.00132337		-1.12728	-0.813799	0.432815	0.603071		3.06014	2.87892	2.74312	2.05301	2.28651	2.85552	2.6601	2.28095	2.10809	1.94149	2.05793
225372_at	225372	10307	Apbb3	amyloid beta (A4) precursor protein-binding, family B, member 3	GO:0001540: beta-amyloid binding, GO:0005737: cytoplasm, GO:0015629: actin cytoskeleton, GO:0043066: negative regulation of apoptotic process		0.581006	0.56892	0.650614	0.6333	-0.201605	0.842637	0.945533	0.932603	2.86683	0.011213	0.351717	0.285072	-1.37067	-2.84602	0.0167299	0.33759	0.244288	1.30982	1.63023	0.132722	0.526843	0.477216	-1.25736	-2.6627	0.0240857	0.0655054	0.0494447	1.42786	2.11617	0.0576519	0.165092	0.123621	5.22998	5.18518	5.25852	4.6385	4.76707	5.10302	4.50029	5.03718	4.69397	4.74505	5.06334
56541_at	56541	22927	Habp4	hyaluronic acid binding protein 4	GO:0005540: hyaluronic acid binding, GO:0005634: nucleus, GO:0005737: cytoplasm, GO:0005737: cytoplasm, GO:0005737: cytoplasm, GO:0006351: transcription, DNA-dependent, GO:0006355: regulation of transcription, DNA-dependent, GO:0030017: sarcomere, GO:0030212: hyaluronan metabolic process, GO:0043392: negative regulation of DNA binding, GO:0071260: cellular response to mechanical stimulus		1.08475	0.293292	0.38544	0.361414	-1.96988	0.0654988	0.385014	0.315527	2.8646	0.0112648	0.351717	0.285072	-1.36079	-3.20919	0.00889281	0.280805	0.199481	1.01234	0.207041	0.839948	0.945086	0.939015	-1.10105	-1.16955	0.269712	0.382898	0.352409	1.25115	2.63594	0.0229485	0.089445	0.0620522	6.02843	6.11156	6.09948	5.47629	5.56177	5.71094	5.77504	6.00869	5.81479	5.74955	6.1565
394252_at	394252	6317	Serpinb3d	serine (or cysteine) peptidase inhibitor, clade B (ovalbumin), member 3D	GO:0004867: serine-type endopeptidase inhibitor activity, GO:0005576: extracellular region, GO:0010951: negative regulation of endopeptidase activity, GO:0030162: regulation of proteolysis	05146: Amoebiasis	-2.82487	0.0117426	0.0304136		-1.36144	0.191284	0.559926		2.86311	0.0112996	0.351717		-1.44575	-2.71112	0.0211748	0.359774		1.08055	0.980408	0.348987	0.69619		-1.67306	-4.62366	0.000984562	0.0066373		-1.07096	-0.532212	0.605034	0.742766		1.14238	1.38702	1.71933	0.762384	0.886751	1.26711	0.615895	0.890528	0.772229	0.518028	0.559717
100046078_at	100046078		Gm15266	predicted gene 15266		03060: Protein export, 04141: Protein processing in endoplasmic reticulum, 04145: Phagosome	-0.487796	0.631974	0.706253		1.06687	0.301065	0.661262		2.86244	0.0113154	0.351717		-1.09674	-0.985405	0.346774	0.788515		1.21929	2.80768	0.0177904	0.358105		-1.20306	-2.3317	0.0423041	0.0982328		1.11153	1.30174	0.219288	0.392017		1.67351	1.76284	1.56874	1.60057	1.51004	1.45571	1.57842	1.45798	1.32076	1.54087	1.28049
52430_at	52430	55268	Echdc2	enoyl Coenzyme A hydratase domain containing 2	GO:0003824: catalytic activity, GO:0005575: cellular_component, GO:0005739: mitochondrion, GO:0006629: lipid metabolic process, GO:0006631: fatty acid metabolic process, GO:0008152: metabolic process, GO:0016829: lyase activity		3.24321	0.00482012	0.0152614	0.0107635	-2.02677	0.0587964	0.370051	0.300888	2.86239	0.0113165	0.351717	0.285491	-1.36964	-3.05006	0.011722	0.306803	0.218664	1.01189	0.175056	0.864373	0.954404	0.949601	1.04944	0.574547	0.578487	0.675155	0.652122	1.45444	4.11244	0.00167902	0.0152454	0.00945221	5.1036	5.11921	5.252	4.79717	4.42354	4.83553	4.73278	5.21567	5.07018	5.21982	5.39381
103655_at	103655	284904	Sec14l4	SEC14-like 4 (S. cerevisiae)	GO:0003674: molecular_function, GO:0005215: transporter activity, GO:0005575: cellular_component, GO:0005622: intracellular, GO:0006810: transport, GO:0008289: lipid binding, GO:0016021: integral to membrane		-3.80831	0.00142252	0.00575814		-2.40622	0.0278738	0.284804		2.86053	0.0113601	0.352638		-1.37136	-3.24757	0.00832148	0.277415		-1.01405	-0.178091	0.862049	0.953949		-1.49718	-4.89441	0.000657313	0.00494936		-1.10709	-1.23887	0.240868	0.41613		3.70906	3.62726	3.86155	3.15449	3.2921	3.25404	3.40905	3.27266	3.23898	3.09085	2.99474
19091_at	19091	5592	Prkg1	protein kinase, cGMP-dependent, type I	GO:0000166: nucleotide binding, GO:0001764: neuron migration, GO:0003824: catalytic activity, GO:0004672: protein kinase activity, GO:0004674: protein serine/threonine kinase activity, GO:0004692: cGMP-dependent protein kinase activity, GO:0004692: cGMP-dependent protein kinase activity, GO:0005246: calcium channel regulator activity, GO:0005515: protein binding, GO:0005524: ATP binding, GO:00057…	04270: Vascular smooth muscle contraction, 04540: Gap junction, 04730: Long-term depression, 04740: Olfactory transduction, 04970: Salivary secretion	-2.24271	0.0386484	0.0775244	0.0633633	-2.53131	0.0216096	0.259853	0.197566	2.85955	0.0113832	0.352671	0.286687	-2.00413	-3.62692	0.00434431	0.243026	0.160812	-1.04532	-0.444672	0.665605	0.872277	0.859095	-2.05269	-6.38185	8.59168e-05	0.00123047	0.000740122	-1.07065	-0.0236667	0.981537	0.989001	0.986616	7.10049	6.60884	6.96897	5.34007	5.25345	6.62714	5.95606	5.92032	5.71712	5.64011	6.14722
14652_at	14652	2740	Glp1r	glucagon-like peptide 1 receptor	GO:0001653: peptide receptor activity, GO:0004871: signal transducer activity, GO:0004872: receptor activity, GO:0004930: G-protein coupled receptor activity, GO:0005622: intracellular, GO:0005886: plasma membrane, GO:0005887: integral to plasma membrane, GO:0007165: signal transduction, GO:0007186: G-protein coupled receptor signaling pathway, GO:0007189: adenylate cyclase-activating G-protein c…	04080: Neuroactive ligand-receptor interaction	-2.79516	0.012499	0.0319037		-0.4633	0.649071	0.866751		2.85745	0.0114328	0.352671		-1.28863	-2.52722	0.0291849	0.403993		1.1643	1.44872	0.176683	0.5691		-1.56752	-5.01343	0.000552188	0.00437244		-1.04476	-0.463108	0.652205	0.777171		3.70049	3.59161	3.57231	3.35125	3.14522	3.43375	3.06599	3.2403	2.93357	2.76154	2.91831
77569_at	77569	22998	Limch1	LIM and calponin homology domains 1	GO:0003674: molecular_function, GO:0003779: actin binding, GO:0005575: cellular_component, GO:0008150: biological_process, GO:0008270: zinc ion binding, GO:0031032: actomyosin structure organization, GO:0046872: metal ion binding		2.95013	0.0090133	0.0248403	0.0181984	-2.61865	0.0180541	0.245814	0.184644	2.85724	0.0114377	0.352671	0.287112	-1.4248	-3.38859	0.00652595	0.27234	0.185098	-1.03203	-0.391675	0.703149	0.888901	0.87682	1.02321	0.267412	0.794669	0.852585	0.8389	1.41262	4.45157	0.000947229	0.0102111	0.00627199	4.12102	3.73783	3.83028	3.27759	3.42566	3.49375	3.37455	3.71325	4.07625	3.98589	3.95577
56320_at	56320	1627	Dbn1	drebrin 1	GO:0003779: actin binding, GO:0005522: profilin binding, GO:0005622: intracellular, GO:0005737: cytoplasm, GO:0007015: actin filament organization, GO:0007275: multicellular organismal development, GO:0007399: nervous system development, GO:0015629: actin cytoskeleton, GO:0030154: cell differentiation		1.19445	0.248829	0.337312	0.313738	-1.95737	0.0670622	0.38877	0.319461	2.8563	0.0114599	0.352671	0.287112	-1.46514	-3.10336	0.0106846	0.301328	0.214239	1.02526	0.277602	0.78672	0.924708	0.917844	-1.12796	-1.51658	0.160799	0.260566	0.231223	1.33175	2.53525	0.0274833	0.10113	0.0710999	6.64586	6.54275	6.44753	5.72724	5.67151	6.3077	6.17477	6.2947	6.46681	6.23744	6.48129
238021_at	238021	25794	Fscn2	fascin homolog 2, actin-bundling protein, retinal (Strongylocentrotus purpuratus)	GO:0003779: actin binding, GO:0005737: cytoplasm, GO:0005856: cytoskeleton, GO:0015629: actin cytoskeleton, GO:0030674: protein binding, bridging, GO:0032420: stereocilium, GO:0042462: eye photoreceptor cell development, GO:0042995: cell projection, GO:0051015: actin filament binding		-1.2919	0.213813	0.29911		0.275407	0.786349	0.926115		2.85597	0.0114678	0.352671		-1.24306	-2.18206	0.0530244	0.483725		1.28734	1.97149	0.0756521	0.464841		-1.43922	-3.99026	0.00263786	0.0134025		1.11188	0.718194	0.487431	0.650717		2.78778	2.59722	2.64456	2.53182	2.17598	2.31044	2.41758	2.0999	2.09968	1.94681	2.42451
100526525_at	100526525		Mir3092	microRNA 3092			-0.723822	0.479095	0.569437	0.549473	0.444907	0.662043	0.874218	0.842116	2.85506	0.0114893	0.352671	0.287112	-1.1914	-1.53707	0.154096	0.644361	0.543536	1.24758	2.57432	0.0267659	0.379951	0.322335	-1.31792	-2.85644	0.0173131	0.0516993	0.0380252	1.12781	1.22267	0.246699	0.422124	0.366394	4.16369	4.24497	4.50058	3.7997	4.22361	4.25091	3.90336	3.95905	3.71648	4.1448	3.78969
723889_at	723889		Mir378	microRNA 378	GO:0045069: regulation of viral genome replication, GO:0071230: cellular response to amino acid stimulus		0.211447	0.835072	0.874666		0.53765	0.597842	0.841543		2.85457	0.0115011	0.352671		-1.13926	-1.35359	0.204524	0.697617		1.19225	2.40307	0.0360807	0.403768		-1.16235	-1.86975	0.0915067	0.172244		1.16857	1.83541	0.0932681	0.225721		1.30453	1.47788	1.26631	1.14272	1.29984	1.13324	1.07204	1.16869	1.24989	0.967222	1.1417
102334_at	102334	55608	Ankrd10	ankyrin repeat domain 10	GO:0003674: molecular_function, GO:0005575: cellular_component, GO:0008150: biological_process		-0.350717	0.730142	0.789497	0.776745	-3.10094	0.00653816	0.177976	0.126435	2.85296	0.0115393	0.352671	0.287112	-1.67021	-4.37733	0.00125735	0.18216	0.119185	-1.0676	-0.82191	0.42944	0.747356	0.718607	-1.31169	-2.86351	0.0171061	0.0512634	0.0376654	1.19271	1.45824	0.172392	0.335976	0.280784	5.79704	6.23098	5.81462	5.05896	5.0813	5.29206	5.42324	5.60158	5.57061	5.47772	5.62761
433766_at	433766	84676	Trim63	tripartite motif-containing 63	GO:0004842: ubiquitin-protein ligase activity, GO:0004842: ubiquitin-protein ligase activity, GO:0005515: protein binding, GO:0005737: cytoplasm, GO:0006936: muscle contraction, GO:0016567: protein ubiquitination, GO:0031432: titin binding, GO:0043161: proteasomal ubiquitin-dependent protein catabolic process, GO:0043292: contractile fiber, GO:0046872: metal ion binding		-5.86265	1.94261e-05	0.000176771	0.000106808	-2.0873	0.0523516	0.356712	0.286988	2.85151	0.0115739	0.352671	0.287112	-2.32144	-3.25539	0.00820975	0.277415	0.195479	1.00322	0.203453	0.842679	0.945958	0.939793	-5.53534	-9.73914	2.27774e-06	0.000139101	8.22606e-05	-2.3768	-3.08506	0.0102377	0.0523485	0.0344794	6.35054	5.36879	5.9009	3.70755	3.82626	5.42255	5.12027	3.73399	3.07467	3.12091	3.76253
69583_at	69583	8741	Tnfsf13	tumor necrosis factor (ligand) superfamily, member 13	GO:0002426: immunoglobulin production in mucosal tissue, GO:0002636: positive regulation of germinal center formation, GO:0005125: cytokine activity, GO:0005164: tumor necrosis factor receptor binding, GO:0005576: extracellular region, GO:0005615: extracellular space, GO:0006955: immune response, GO:0008284: positive regulation of cell proliferation, GO:0009897: external side of plasma membrane, …	04060: Cytokine-cytokine receptor interaction, 04672: Intestinal immune network for IgA production, 05323: Rheumatoid arthritis	-5.42499	4.67432e-05	0.000362861	0.000220895	1.74625	0.098952	0.447066	0.378605	2.85097	0.011587	0.352671	0.287112	-1.12135	-0.786991	0.448833	0.842899	0.790481	2.25424	3.7228	0.00365564	0.218331	0.166488	-5.66137	-7.07197	3.69172e-05	0.000711963	0.000425509	-2.23965	-3.25431	0.0075594	0.0427139	0.0276476	6.16865	5.78966	5.42111	5.67104	6.44726	5.23847	4.7166	2.34337	3.1337	4.24206	2.8652
277939_at	277939	26005	C2cd3	C2 calcium-dependent domain containing 3	GO:0001701: in utero embryonic development, GO:0001947: heart looping, GO:0003674: molecular_function, GO:0005813: centrosome, GO:0005932: microtubule basal body, GO:0007389: pattern specification process, GO:0007420: brain development, GO:0008589: regulation of smoothened signaling pathway, GO:0008589: regulation of smoothened signaling pathway, GO:0016485: protein processing, GO:0021915: neural…		-1.00675	0.32828	0.421143	0.397819	-2.51947	0.02214	0.262124	0.19965	2.85008	0.0116083	0.352671	0.287112	-1.31622	-2.94488	0.014079	0.321155	0.229252	-1.01747	-0.291237	0.776556	0.920546	0.913008	-1.21347	-2.6023	0.0266985	0.0704968	0.0537084	1.06606	0.851948	0.412188	0.585166	0.534195	5.84959	5.92993	5.71695	5.49248	5.41881	5.46378	5.37584	5.59817	5.53949	5.49187	5.59065
100504548_at	100504548		Gm20282	predicted gene, 20282			-1.66503	0.114371	0.182378	0.161318	0.718734	0.482144	0.777684	0.734668	2.84988	0.011613	0.352671	0.287112	-1.22885	-1.33676	0.209781	0.702774	0.612451	1.45369	3.54175	0.00497424	0.244701	0.192746	-1.7019	-5.02882	0.000539961	0.00430159	0.00264349	1.04963	0.425559	0.678537	0.795766	0.765098	3.5614	3.36122	3.97502	2.94013	3.40114	3.88808	2.9958	2.89035	2.92835	2.93996	2.79048
100312485_at	100312485		Vmn1r221	vomeronasal 1 receptor 221	GO:0003674: molecular_function, GO:0005575: cellular_component, GO:0008150: biological_process		-1.46383	0.161629	0.240199		0.248207	0.806971	0.933351		2.84285	0.011783	0.356605		-1.21662	-1.65574	0.127568	0.614581		1.2334	2.3857	0.0371867	0.40685		-1.40719	-3.53283	0.0055516	0.0227426		1.06637	0.597893	0.561873	0.709583		1.21424	0.955534	1.44337	0.799932	0.946393	1.16836	0.793207	0.627563	0.774242	0.847854	0.639393
57436_at	57436	23710	Gabarapl1	gamma-aminobutyric acid (GABA) A receptor-associated protein-like 1	GO:0005515: protein binding, GO:0005622: intracellular, GO:0005737: cytoplasm, GO:0005776: autophagic vacuole, GO:0005783: endoplasmic reticulum, GO:0005794: Golgi apparatus, GO:0005856: cytoskeleton, GO:0005874: microtubule, GO:0008092: cytoskeletal protein binding, GO:0016020: membrane, GO:0031410: cytoplasmic vesicle, GO:0032590: dendrite membrane, GO:0032839: dendrite cytoplasm, GO:0044297: c…	04140: Regulation of autophagy	-5.29061	6.15005e-05	0.000453933	0.000277126	-1.56299	0.136622	0.498993	0.429102	2.84277	0.011785	0.356605	0.290396	-1.51568	-3.31696	0.00738214	0.273155	0.188611	1.06464	0.590006	0.567696	0.825409	0.804437	-2.1898	-6.50267	7.37892e-05	0.0011073	0.000665105	-1.35704	-2.81581	0.0166119	0.0727195	0.049078	7.60106	7.20686	7.73263	6.63881	6.94182	7.15409	6.94065	6.58425	6.26368	6.07465	6.60718
217149_at	217149	284106	Cisd3	CDGSH iron sulfur domain 3	GO:0005739: mitochondrion, GO:0005739: mitochondrion, GO:0008150: biological_process, GO:0043231: intracellular membrane-bounded organelle, GO:0046872: metal ion binding, GO:0051536: iron-sulfur cluster binding, GO:0051537: 2 iron, 2 sulfur cluster binding		-1.54873	0.140004	0.213995	0.191801	2.42645	0.0267563	0.280823	0.21616	2.83942	0.0118669	0.358224	0.291446	-1.00907	-0.115059	0.910587	0.985313	0.978532	1.56577	4.05924	0.00208243	0.175539	0.126838	-1.47157	-4.59896	0.00102206	0.00681274	0.00425939	1.07366	0.490047	0.633612	0.763679	0.729226	3.74791	3.53887	3.42552	3.77411	3.35326	3.69984	3.38014	3.02815	2.92905	2.95651	3.15421
71089_at	71089	124404	Sept12	septin 12	GO:0000166: nucleotide binding, GO:0005525: GTP binding, GO:0005819: spindle, GO:0015630: microtubule cytoskeleton, GO:0030496: midbody, GO:0042803: protein homodimerization activity, GO:0048471: perinuclear region of cytoplasm, GO:0097227: sperm annulus		-1.89673	0.0751236	0.130555		-0.602241	0.555024	0.819707		2.83682	0.0119306	0.359172		-1.27332	-2.147	0.056303	0.492256		1.13608	1.58134	0.143499	0.537248		-1.41224	-4.00194	0.00258909	0.0132325		1.02433	0.231283	0.821289	0.891909		2.31746	2.72544	2.54546	2.35663	2.04343	2.01724	2.31203	2.11017	2.0305	2.0305	1.99045
320091_at	320091	121601	Ano4	anoctamin 4	GO:0003674: molecular_function, GO:0005575: cellular_component, GO:0008150: biological_process		-3.14743	0.00591942	0.0179225	0.0127926	-3.58978	0.00228232	0.12337	0.0845545	2.8364	0.0119411	0.359172	0.2923	-3.26964	-6.4789	5.88592e-05	0.0921998	0.0542606	-1.30759	-1.19132	0.259824	0.636063	0.596992	-2.91235	-4.91971	0.000633302	0.00483142	0.00298235	-1.16471	-0.961664	0.356634	0.534389	0.480771	5.32011	4.68483	5.66461	3.17315	3.2332	3.8517	3.8683	4.05597	3.654	4.09171	2.81075
17127_at	17127	4088	Smad3	SMAD family member 3	GO:0000122: negative regulation of transcription from RNA polymerase II promoter, GO:0000122: negative regulation of transcription from RNA polymerase II promoter, GO:0000987: core promoter proximal region sequence-specific DNA binding, GO:0001102: RNA polymerase II activating transcription factor binding, GO:0001501: skeletal system development, GO:0001649: osteoblast differentiation, GO:0001666…	04110: Cell cycle, 04144: Endocytosis, 04310: Wnt signaling pathway, 04350: TGF-beta signaling pathway, 04520: Adherens junction, 05142: Chagas disease (American trypanosomiasis), 05200: Pathways in cancer, 05210: Colorectal cancer, 05212: Pancreatic cancer, 05220: Chronic myeloid leukemia	-0.622818	0.541734	0.626539	0.609025	-2.46244	0.024872	0.275087	0.210058	2.8333	0.0120178	0.360528	0.293234	-1.52505	-3.2934	0.0076882	0.274566	0.190763	-1.02199	-0.319101	0.755923	0.912364	0.902775	-1.32014	-3.16885	0.0101959	0.0352827	0.024913	1.13036	1.20713	0.252394	0.428454	0.372649	6.76758	6.42873	6.73431	5.58795	6.0158	6.20902	6.26451	6.19364	6.23483	6.16486	6.39799
72433_at	72433	23682	Rab38	RAB38, member of RAS oncogene family	GO:0000166: nucleotide binding, GO:0005515: protein binding, GO:0005525: GTP binding, GO:0005622: intracellular, GO:0005737: cytoplasm, GO:0005783: endoplasmic reticulum, GO:0005794: Golgi apparatus, GO:0005829: cytosol, GO:0005886: plasma membrane, GO:0006810: transport, GO:0006996: organelle organization, GO:0007264: small GTPase mediated signal transduction, GO:0015031: protein transport, GO:0…		-1.98471	0.0636888	0.11467		1.45601	0.163751	0.531263		2.83284	0.012029	0.360528		-1.1176	-0.758022	0.465252	0.848676		1.38713	4.02755	0.00219455	0.178438		-1.52084	-3.59735	0.00499115	0.0211085		1.01935	0.191769	0.851375	0.910042		2.64195	3.33062	2.99315	2.64759	2.77613	2.89841	3.0662	2.54585	2.28824	2.32956	2.46521
58185_at	58185	91543	Rsad2	radical S-adenosyl methionine domain containing 2	GO:0001503: ossification, GO:0003824: catalytic activity, GO:0005515: protein binding, GO:0005739: mitochondrion, GO:0005741: mitochondrial outer membrane, GO:0005743: mitochondrial inner membrane, GO:0005783: endoplasmic reticulum, GO:0005789: endoplasmic reticulum membrane, GO:0005811: lipid particle, GO:0008152: metabolic process, GO:0009615: response to virus, GO:0016020: membrane, GO:0030278…		-2.2272	0.0398498	0.0794142	0.0650309	2.75407	0.0136225	0.223901	0.165547	2.83113	0.0120717	0.361376	0.294041	1.23054	0.154905	0.879859	0.980393	0.969858	4.6626	5.58082	0.000197406	0.0478444	0.0301889	-4.03793	-8.32509	9.15294e-06	0.000305171	0.000180551	-1.06568	-0.0219582	0.98287	0.98982	0.987664	6.63582	5.54143	6.10832	5.04528	5.46136	6.88143	7.30184	4.08054	3.92755	4.0418	4.48482
258708_at	258708		Olfr1342	olfactory receptor 1342	GO:0004984: olfactory receptor activity, GO:0007186: G-protein coupled receptor signaling pathway, GO:0007608: sensory perception of smell, GO:0016021: integral to membrane, GO:0050911: detection of chemical stimulus involved in sensory perception of smell	04740: Olfactory transduction	-3.13735	0.00604847	0.0182126		-0.610116	0.549918	0.816401		2.82804	0.0121489	0.362052		-1.36507	-2.63654	0.0241194	0.380209		1.16545	1.38954	0.193495	0.583136		-1.73335	-4.76342	0.000798167	0.0056788		-1.08952	-0.840793	0.41815	0.590206		2.76772	2.94243	2.46539	2.36433	2.3778	2.37578	2.00648	2.29272	1.9102	1.78164	1.72397
100504343_at	100504343		Gm20185	predicted gene, 20185			-0.540165	0.596144	0.675405		-1.67054	0.113264	0.468888		2.82787	0.0121532	0.362052		-1.42261	-2.94311	0.0141226	0.321856		1.04329	0.530496	0.606831	0.842873		-1.29806	-2.54803	0.029286	0.0753632		1.14339	1.40126	0.188383	0.355658		2.77748	2.68212	2.32565	2.21309	2.2693	1.81129	2.06097	2.08395	2.19504	2.46492	2.15208
108176_at	108176		Npm3-ps1	nucleoplasmin 3, pseudogene 1			-2.11473	0.0496483	0.0943056		-0.969173	0.346152	0.692094		2.82659	0.0121853	0.362195		-1.28996	-2.28434	0.044474	0.45793		1.09318	1.24059	0.241827	0.620976		-1.40319	-3.74997	0.0038875	0.0175941		1.00497	0.0613601	0.95216	0.971844		1.04209	0.888035	1.31929	0.613922	0.915861	0.608671	0.747336	0.502383	0.618878	0.696854	0.597645
12307_at	12307	793	Calb1	calbindin 1	GO:0005499: vitamin D binding, GO:0005509: calcium ion binding, GO:0005622: intracellular, GO:0005634: nucleus, GO:0005634: nucleus, GO:0005737: cytoplasm, GO:0005829: cytosol, GO:0007626: locomotory behavior, GO:0030424: axon, GO:0030424: axon, GO:0030425: dendrite, GO:0043005: neuron projection, GO:0043025: neuronal cell body, GO:0044297: cell body, GO:0048167: regulation of synaptic plasticity…		10.7908	5.44911e-09	3.62625e-07	2.14541e-07	2.03477	0.0579048	0.368159	0.298799	2.82563	0.0122095	0.362487	0.295457	-1.05923	-0.610068	0.5549	0.887712	0.845719	2.43164	3.51095	0.00524358	0.246161	0.19472	7.73085	6.84059	4.86858e-05	0.000862386	0.000515861	19.9121	14.0076	2.02925e-08	1.59841e-05	9.40684e-06	5.47861	5.24351	5.25699	5.52188	5.79248	4.41768	4.86811	6.90038	7.87824	8.49336	9.04755
21928_at	21928	7127	Tnfaip2	tumor necrosis factor, alpha-induced protein 2	GO:0001525: angiogenesis, GO:0007275: multicellular organismal development, GO:0030154: cell differentiation		0.0591096	0.95356	0.966054	0.963366	2.82991	0.0116189	0.212509	0.1549	2.82211	0.0122986	0.363849	0.296647	1.16106	0.238608	0.816041	0.968632	0.952677	5.01856	5.1202	0.00038917	0.0707224	0.0448473	-2.21519	-3.5542	0.00535914	0.0221914	0.0150242	1.95124	1.80839	0.0975982	0.232179	0.1825	5.42519	5.08892	6.45354	4.74218	5.17552	6.69516	6.4653	4.56234	4.57371	4.25006	5.02818
622976_at	622976		Gm6377	predicted gene 6377	GO:0003674: molecular_function, GO:0005575: cellular_component, GO:0008150: biological_process		1.88028	0.0774534	0.133801		1.84102	0.0832776	0.41903		2.82084	0.0123308	0.36411		-1.04655	-0.502941	0.625475	0.913959		1.36283	3.77872	0.00332625	0.21053		-1.04783	-0.61586	0.551956	0.651584		1.36117	3.11274	0.00974161	0.0506178		1.67165	1.69707	1.69608	1.39477	1.49992	1.92108	1.61966	1.80204	1.55288	1.4046	1.69339
66748_at	66748	285141	4933404M02Rik	RIKEN cDNA 4933404M02 gene	GO:0003674: molecular_function, GO:0005575: cellular_component, GO:0008150: biological_process		0.198784	0.844808	0.88237		1.14582	0.267867	0.631723		2.81673	0.0124357	0.364514		-1.15268	-1.33047	0.211772	0.704279		1.45506	2.70039	0.0214679	0.366365		-1.27683	-2.9719	0.0142278	0.0448843		1.31358	1.77016	0.104035	0.241755		3.00047	3.01984	2.74237	2.61713	2.59373	2.98695	2.6506	2.43973	2.61318	2.63832	2.59553
320472_at	320472	22843	Ppm1e	protein phosphatase 1E (PP2C domain containing)	GO:0003824: catalytic activity, GO:0004721: phosphoprotein phosphatase activity, GO:0004722: protein serine/threonine phosphatase activity, GO:0005634: nucleus, GO:0005730: nucleolus, GO:0005737: cytoplasm, GO:0006469: negative regulation of protein kinase activity, GO:0006470: protein dephosphorylation, GO:0016787: hydrolase activity, GO:0035690: cellular response to drug, GO:0035970: peptidyl-t…		3.64068	0.0020444	0.00772249	0.00520371	-1.85525	0.0811234	0.414934	0.345304	2.81669	0.0124368	0.364514	0.297372	-1.58581	-3.6359	0.00427864	0.243005	0.160812	1.02036	0.308382	0.763837	0.915612	0.906761	1.14941	0.951453	0.364145	0.478702	0.448797	1.85986	5.18849	0.000288	0.00456296	0.00276172	5.19846	5.38246	5.22907	4.24774	4.34911	4.96094	4.75263	5.91633	5.11064	5.45809	5.27723
12366_at	12366	835	Casp2	caspase 2	GO:0004197: cysteine-type endopeptidase activity, GO:0005515: protein binding, GO:0005622: intracellular, GO:0005634: nucleus, GO:0005737: cytoplasm, GO:0005739: mitochondrion, GO:0006508: proteolysis, GO:0006915: apoptotic process, GO:0006915: apoptotic process, GO:0006917: induction of apoptosis, GO:0006917: induction of apoptosis, GO:0006917: induction of apoptosis, GO:0006977: DNA damage resp…		0.305474	0.763743	0.817067	0.805204	-2.06745	0.0543903	0.361255	0.292105	2.81603	0.0124537	0.364514	0.297372	-1.35403	-2.77807	0.0188379	0.347937	0.253174	1.00783	0.12898	0.899817	0.967107	0.963722	-1.16419	-1.77776	0.106282	0.19234	0.164793	1.17218	1.91015	0.0821916	0.20813	0.160573	6.83993	6.79619	6.49293	6.39798	6.42624	6.10348	6.16683	6.47404	6.44125	6.52067	6.55503
100302498_at	100302498		Snora21	small nucleolar RNA, H/ACA box 21	GO:0003674: molecular_function, GO:0005575: cellular_component, GO:0008150: biological_process		-0.462991	0.649288	0.721063	0.706436	0.569096	0.576791	0.830601	0.792968	2.816	0.0124545	0.364514	0.297372	-1.27061	-1.35109	0.205299	0.698238	0.606896	1.46307	4.19917	0.00165461	0.154467	0.108604	-1.53631	-3.372	0.00725166	0.0275861	0.0190257	1.21004	1.40574	0.187081	0.354207	0.298436	10.7343	10.0391	10.6647	9.41048	9.97205	10.7285	10.245	10.0025	9.86071	9.68248	9.99879
74011_at	74011	9481	Slc25a27	solute carrier family 25, member 27	GO:0003674: molecular_function, GO:0005739: mitochondrion, GO:0005739: mitochondrion, GO:0006810: transport, GO:0008284: positive regulation of cell proliferation, GO:0016020: membrane, GO:0016021: integral to membrane, GO:0035356: cellular triglyceride homeostasis, GO:0043025: neuronal cell body, GO:0043066: negative regulation of apoptotic process, GO:0045177: apical part of cell, GO:0051562: r…		-1.26131	0.224362	0.311037	0.287408	-1.11049	0.282367	0.645333	0.587301	2.81511	0.0124774	0.364514	0.297372	-1.83743	-2.7496	0.0197982	0.351275	0.255846	1.16572	1.33049	0.211595	0.597944	0.555043	-1.9291	-3.36078	0.00738877	0.0279518	0.019307	1.11032	0.905103	0.384573	0.560515	0.508627	6.15306	5.30277	6.29317	4.2906	4.75822	5.44439	5.55499	5.61721	4.73842	4.63337	4.91036
102595_at	102595	80301	Plekho2	pleckstrin homology domain containing, family O member 2	GO:0003674: molecular_function, GO:0005543: phospholipid binding, GO:0005575: cellular_component, GO:0008150: biological_process		3.68782	0.00184613	0.00710705	0.00476851	-0.80406	0.43255	0.749903	0.703249	2.81448	0.0124936	0.364514	0.297372	-1.23912	-2.16307	0.0547766	0.489103	0.3772	1.09621	1.27337	0.23042	0.612409	0.571411	1.07553	0.982626	0.349319	0.463806	0.433608	1.46092	4.23981	0.00135191	0.0131559	0.00809841	5.61818	5.41693	5.54929	5.0485	5.15108	5.36836	5.29559	5.71669	5.54331	5.64013	5.63696
11694_at	11694	257	Alx3	aristaless-like homeobox 3	GO:0003677: DNA binding, GO:0003700: sequence-specific DNA binding transcription factor activity, GO:0005634: nucleus, GO:0006351: transcription, DNA-dependent, GO:0006355: regulation of transcription, DNA-dependent, GO:0007275: multicellular organismal development, GO:0007389: pattern specification process, GO:0035115: embryonic forelimb morphogenesis, GO:0035116: embryonic hindlimb morphogenesi…		-3.06771	0.007019	0.0204746	0.0147982	1.03895	0.313491	0.669013	0.614809	2.80905	0.0126344	0.365918	0.298913	-1.12296	-1.04081	0.321534	0.775586	0.703371	1.33393	3.51779	0.00518244	0.245206	0.193254	-1.64811	-5.91723	0.000157001	0.00183808	0.00111221	-1.10025	-0.668657	0.517334	0.674783	0.631369	4.70887	4.64258	4.6379	4.30116	4.07529	4.77528	4.7178	4.0389	4.09344	3.70073	3.90651
624341_at	624341		Olfr856-ps1	olfactory receptor 856, pseudogene 1			-0.567081	0.578129	0.658964		0.533496	0.60065	0.842001		2.80751	0.0126744	0.365918		-1.26668	-2.06832	0.0643775	0.515573		1.3802	2.15208	0.0556593	0.435542		-1.41358	-2.81479	0.0185856	0.054454		1.23677	1.4176	0.183672	0.3502		2.0002	1.95937	1.52343	1.48946	1.50272	1.59777	1.41264	1.19272	1.34042	1.04531	1.70983
240354_at	240354	10892	Malt1	mucosa associated lymphoid tissue lymphoma translocation gene 1	GO:0001923: B-1 B cell differentiation, GO:0002020: protease binding, GO:0002726: positive regulation of T cell cytokine production, GO:0004197: cysteine-type endopeptidase activity, GO:0004842: ubiquitin-protein ligase activity, GO:0004871: signal transducer activity, GO:0005515: protein binding, GO:0005622: intracellular, GO:0005634: nucleus, GO:0005737: cytoplasm, GO:0005829: cytosol, GO:00065…	04660: T cell receptor signaling pathway, 04662: B cell receptor signaling pathway	-4.54684	0.000291039	0.00159969	0.00100285	-0.285532	0.778714	0.923682	0.904017	2.80713	0.0126843	0.365918	0.299607	-1.21456	-1.98416	0.0742223	0.534138	0.423304	1.14004	1.66484	0.125533	0.520282	0.471696	-1.63875	-5.89209	0.00016234	0.0018797	0.00113812	-1.18352	-1.82773	0.0944815	0.227507	0.178197	6.46768	6.39758	6.45791	5.99614	6.11324	6.38755	6.11762	5.96213	5.59489	5.60152	5.7252
387187_at	387187		Mir192	microRNA 192	GO:0071230: cellular response to amino acid stimulus, GO:0071333: cellular response to glucose stimulus, GO:0071560: cellular response to transforming growth factor beta stimulus		-0.370466	0.715647	0.777415		-1.2367	0.233141	0.601682		2.80562	0.012724	0.365918		-1.29915	-2.50269	0.0304584	0.408921		1.07087	0.883111	0.396992	0.727792		-1.22637	-2.41223	0.0369008	0.0889983		1.13443	1.38225	0.193987	0.362379		1.09271	1.35012	1.43987	0.898866	0.782797	0.919425	1.07942	1.11053	0.961522	0.957546	0.993794
258111_at	258111		Olfr1129	olfactory receptor 1129	GO:0004871: signal transducer activity, GO:0004930: G-protein coupled receptor activity, GO:0004984: olfactory receptor activity, GO:0007165: signal transduction, GO:0007186: G-protein coupled receptor signaling pathway, GO:0007608: sensory perception of smell, GO:0016021: integral to membrane, GO:0050911: detection of chemical stimulus involved in sensory perception of smell		-1.15349	0.264793	0.355115		-1.70316	0.106891	0.459569		2.80504	0.0127393	0.365918		-1.33243	-2.62458	0.0246282	0.382802		1.03111	0.502822	0.625493	0.853102		-1.2875	-2.85526	0.0173479	0.0517786		1.0671	0.814595	0.432378	0.602706		1.33912	1.61831	1.71016	0.941478	1.31769	1.10921	1.20641	1.30566	1.09329	1.25943	1.12982
100216530_at	100216530		Snord118	small nucleolar RNA, C/D box 118	GO:0003674: molecular_function, GO:0005575: cellular_component, GO:0008150: biological_process		-4.06786	0.000812041	0.00366356	0.00237169	0.240746	0.812654	0.934733	0.91966	2.80486	0.0127439	0.365918	0.299607	-1.30661	-2.01755	0.070158	0.527797	0.41572	1.37948	2.19049	0.0521099	0.430185	0.375434	-2.24933	-7.63374	1.93483e-05	0.000480486	0.000286154	-1.24794	-1.48706	0.164755	0.326017	0.27074	7.3298	7.1068	6.94535	6.39921	6.45248	7.13286	6.88577	5.81592	6.18226	5.69508	6.11607
14790_at	14790	113246	Grcc10	gene rich cluster, C10 gene	GO:0003674: molecular_function, GO:0005575: cellular_component, GO:0008150: biological_process		2.16092	0.0453837	0.087982	0.072663	-2.14161	0.0471242	0.343564	0.274317	2.80396	0.0127675	0.365918	0.299607	-1.34649	-2.96983	0.0134797	0.317203	0.225823	1.00089	0.034844	0.972859	0.991152	0.989516	-1.02393	-0.302137	0.768833	0.83269	0.817553	1.31619	3.27232	0.00731988	0.0418758	0.0270781	7.61972	7.73095	7.5133	7.31936	7.16564	7.28047	6.99192	7.72106	7.43196	7.56917	7.62259
100217451_at	100217451		Snora7a	small nucleolar RNA, H/ACA box 7A	GO:0003674: molecular_function, GO:0005575: cellular_component, GO:0008150: biological_process		-3.56964	0.00238392	0.00877212	0.00594137	1.03275	0.316302	0.670701	0.616538	2.80032	0.0128637	0.366999	0.299607	-1.19968	-1.03604	0.323652	0.777202	0.705247	1.55976	4.71903	0.000720413	0.101334	0.0667913	-2.34992	-6.57459	6.7459e-05	0.00104801	0.000629962	-1.25582	-1.14559	0.275985	0.453114	0.397819	9.40702	8.70013	9.42157	8.27528	8.6307	9.46085	9.14985	8.11627	7.97018	7.77866	8.03587
105005_at	105005	151354	Fam84a	family with sequence similarity 84, member A	GO:0003674: molecular_function, GO:0005575: cellular_component, GO:0008150: biological_process		-6.57311	4.92831e-06	6.09534e-05	3.65899e-05	-0.210783	0.835582	0.943415	0.929999	2.79838	0.0129152	0.366999	0.299607	-1.35311	-2.15222	0.0558023	0.490405	0.378955	1.23514	1.92728	0.0814852	0.475302	0.426668	-2.69743	-7.61712	1.97119e-05	0.000484755	0.000288663	-1.61399	-4.05191	0.00186241	0.0163537	0.0101615	6.79893	6.17293	6.63048	6.05463	6.27349	5.74379	6.34041	4.75577	5.33497	5.30783	5.03059
100217432_at	100217432		Snord71	small nucleolar RNA, C/D box 71	GO:0003674: molecular_function, GO:0005575: cellular_component, GO:0008150: biological_process		-1.53324	0.143759	0.218526	0.196148	-0.112611	0.911669	0.970009	0.96254	2.79629	0.0129711	0.366999	0.299607	-1.30102	-1.8296	0.0960597	0.56964	0.463097	1.23549	2.52352	0.0292502	0.385522	0.328914	-1.53939	-3.85172	0.00329594	0.0156489	0.0102955	1.04418	0.538941	0.600535	0.739889	0.702218	10.095	9.69054	10.1588	9.14013	9.39962	10.0317	9.73617	9.64579	9.24461	9.13465	9.41651
723880_at	723880		Mir540	microRNA 540			-1.97544	0.0648144	0.116215	0.0988035	-1.0254	0.319654	0.672892	0.618543	2.79599	0.0129791	0.366999	0.299607	-1.56735	-2.59722	0.0258325	0.388252	0.283126	1.13648	1.32338	0.213868	0.600041	0.557253	-1.7546	-3.39848	0.00693843	0.0267353	0.0183857	1.01519	0.219479	0.830248	0.896781	0.87937	5.17999	5.01818	5.92823	4.79153	5.14507	4.55102	4.56604	4.62612	4.22621	4.92326	4.62612
108153_at	108153	11173	Adamts7	a disintegrin-like and metallopeptidase (reprolysin type) with thrombospondin type 1 motif, 7	GO:0004222: metalloendopeptidase activity, GO:0005576: extracellular region, GO:0005578: proteinaceous extracellular matrix, GO:0006508: proteolysis, GO:0008152: metabolic process, GO:0008233: peptidase activity, GO:0008237: metallopeptidase activity, GO:0008270: zinc ion binding, GO:0009986: cell surface, GO:0016787: hydrolase activity, GO:0031012: extracellular matrix, GO:0046872: metal ion bin…		5.84641	2.00608e-05	0.000180655	0.000109204	-1.3512	0.194477	0.563253	0.497646	2.79513	0.0130019	0.366999	0.299607	-1.60781	-2.92946	0.0144627	0.323284	0.23104	1.11814	0.935779	0.37046	0.710211	0.678194	1.58149	4.0412	0.00243194	0.0126652	0.00821577	2.84315	6.29877	5.53273e-05	0.00155819	0.000932641	4.62457	4.55996	4.42037	3.2801	3.33633	4.28152	4.21043	5.3657	4.80447	5.10885	5.43369
100504195_at	100504195	84953	Micalcl	MICAL C-terminal like	GO:0005737: cytoplasm, GO:0007275: multicellular organismal development, GO:0007283: spermatogenesis, GO:0030154: cell differentiation, GO:0051019: mitogen-activated protein kinase binding		-0.0951584	0.92531	0.944878		-0.455163	0.654797	0.870644		2.79382	0.013037	0.366999		-1.27471	-2.19224	0.0521071	0.481745		1.14743	1.60608	0.137953	0.531822		-1.23757	-2.20572	0.0523401	0.114671		1.18187	1.7349	0.11031	0.251443		3.21726	3.35195	3.11228	2.93731	2.58053	3.14168	2.80446	3.10772	2.60818	2.84883	3.07297
100038419_at	100038419		E330027M22Rik	RIKEN cDNA gene, E330027M22Rik			-2.26819	0.0367466	0.0744921		-0.50611	0.61933	0.852238		2.79364	0.013042	0.366999		-1.31872	-2.21286	0.0502956	0.475293		1.16577	1.73672	0.111707	0.505667		-1.58337	-4.48773	0.00121076	0.00768678		-1.02995	-0.0750756	0.941486	0.965413		2.35597	2.42263	2.53967	2.00334	1.66497	1.87702	2.49121	1.63149	1.84273	1.47998	2.08663
319564_at	319564		C230012O17Rik	RIKEN cDNA C230012O17 gene	GO:0003674: molecular_function, GO:0005575: cellular_component, GO:0008150: biological_process		-3.38567	0.00354707	0.0120204	0.00832025	1.89557	0.0752859	0.406176	0.335776	2.79265	0.0130687	0.366999	0.299607	-1.0641	-0.521892	0.612668	0.910154	0.873609	1.41719	3.4309	0.00601591	0.259849	0.20621	-1.66062	-4.62095	0.000988597	0.00666272	0.00416142	-1.10118	-1.08601	0.300423	0.477848	0.423217	3.56208	3.69987	4.00484	3.73064	3.62709	3.57811	3.7681	3.06322	3.31926	2.76725	2.93711
75723_at	75723	154810	Amotl1	angiomotin-like 1	GO:0003365: establishment of cell polarity involved in ameboidal cell migration, GO:0005515: protein binding, GO:0005737: cytoplasm, GO:0005923: tight junction, GO:0005923: tight junction, GO:0016324: apical plasma membrane, GO:0030027: lamellipodium, GO:0030054: cell junction, GO:0031410: cytoplasmic vesicle, GO:0035329: hippo signaling cascade, GO:0042802: identical protein binding, GO:0043536:…	04530: Tight junction	2.28308	0.0356767	0.072779	0.0591647	-2.17307	0.0443193	0.337223	0.267831	2.79188	0.0130894	0.366999	0.299607	-1.36002	-2.86541	0.0161732	0.336158	0.243332	1.00137	-0.000496759	0.999613	0.99973	0.999718	-1.02165	-0.202803	0.843418	0.888	0.878037	1.33302	3.35546	0.00631052	0.0376926	0.0242576	7.06222	6.86777	7.2291	6.56931	6.42234	6.6681	6.7837	7.0287	7.02753	7.06868	6.9927
16337_at	16337	3643	Insr	insulin receptor	GO:0000166: nucleotide binding, GO:0000187: activation of MAPK activity, GO:0001933: negative regulation of protein phosphorylation, GO:0001934: positive regulation of protein phosphorylation, GO:0003007: heart morphogenesis, GO:0004672: protein kinase activity, GO:0004713: protein tyrosine kinase activity, GO:0004714: transmembrane receptor protein tyrosine kinase activity, GO:0004716: receptor …	04520: Adherens junction, 04910: Insulin signaling pathway, 04930: Type II diabetes mellitus, 04960: Aldosterone-regulated sodium reabsorption	-5.48551	4.13395e-05	0.000327262	0.000198714	0.218037	0.830016	0.941218	0.927073	2.79156	0.013098	0.366999	0.299607	-1.15842	-1.54219	0.152856	0.643138	0.542258	1.16162	2.05603	0.06557	0.450711	0.399378	-1.66022	-6.08025	0.000126654	0.00159222	0.00096196	-1.23377	-2.56812	0.0259136	0.0971558	0.0680719	6.82503	6.80773	6.63938	6.46281	6.68162	6.49789	6.53844	6.24016	5.97162	5.9589	5.91989
232533_at	232533	23012	Stk38l	serine/threonine kinase 38 like	GO:0000166: nucleotide binding, GO:0000287: magnesium ion binding, GO:0003779: actin binding, GO:0004672: protein kinase activity, GO:0004674: protein serine/threonine kinase activity, GO:0004674: protein serine/threonine kinase activity, GO:0005524: ATP binding, GO:0005634: nucleus, GO:0005737: cytoplasm, GO:0005737: cytoplasm, GO:0005856: cytoskeleton, GO:0005886: plasma membrane, GO:0006468: p…		-1.14637	0.267648	0.358178	0.334368	-2.04531	0.0567496	0.365084	0.295792	2.79026	0.0131331	0.366999	0.299607	-1.46441	-3.70692	0.0037944	0.234606	0.154245	1.0169	0.106518	0.917184	0.973003	0.970587	-1.35417	-3.15276	0.0104764	0.0360083	0.0254823	1.09968	0.837216	0.420074	0.592027	0.541812	5.02154	5.23058	5.39975	4.65108	4.80261	4.60195	4.63688	4.65138	5.03034	4.77142	4.66644
100502745_at	100502745		2900009J06Rik	RIKEN cDNA 2900009J06 gene			-3.92365	0.00110855	0.00471279	0.0030806	0.0874766	0.931323	0.977882	0.971878	2.78951	0.0131534	0.367158	0.299607	-1.24243	-1.75234	0.109067	0.588396	0.48188	1.23032	2.35828	0.0390003	0.409439	0.352849	-1.82893	-5.8929	0.000162166	0.00187934	0.00113792	-1.19648	-1.4394	0.177546	0.342431	0.287086	4.90273	4.57033	4.69098	4.07143	4.21453	4.78656	4.48167	4.09203	3.92791	3.54917	3.80514
100101484_at	100101484		Trac	T cell receptor alpha constant			-4.28813	0.000505674	0.00249896	0.00159072	-2.51954	0.0221368	0.262124	0.19965	2.78776	0.0132008	0.367518	0.299607	-1.95834	-3.72848	0.00365893	0.23075	0.15173	-1.0327	-0.410301	0.689852	0.883554	0.870332	-2.62883	-8.30441	9.35368e-06	0.000309669	0.000183205	-1.38628	-1.66788	0.123182	0.269714	0.217018	4.57551	4.27023	4.93365	3.43322	3.04906	4.29908	3.51284	3.24876	3.43833	3.08531	3.09554
100217413_at	100217413		Scarna10	small Cajal body-specific RNA 10	GO:0003674: molecular_function, GO:0005575: cellular_component, GO:0008150: biological_process		-2.01839	0.0597426	0.109042	0.0920368	-0.905961	0.377717	0.716006	0.666078	2.78603	0.013248	0.367803	0.299607	-1.78707	-2.836	0.0170251	0.338911	0.244866	1.2749	1.33535	0.210055	0.597567	0.554836	-2.30848	-5.12104	0.000472516	0.00391784	0.00240209	-1.01323	0.131326	0.89786	0.938558	0.92864	5.53178	4.91316	5.5751	3.71289	4.07383	5.23365	4.64315	4.6356	3.62195	4.18597	4.02576
20677_at	20677	6659	Sox4	SRY-box containing gene 4	GO:0000976: transcription regulatory region sequence-specific DNA binding, GO:0001046: core promoter sequence-specific DNA binding, GO:0001046: core promoter sequence-specific DNA binding, GO:0001071: nucleic acid binding transcription factor activity, GO:0001071: nucleic acid binding transcription factor activity, GO:0001077: RNA polymerase II core promoter proximal region sequence-specific DNA …		-6.1938	1.0164e-05	0.000105603	6.35902e-05	-2.15012	0.0463495	0.342004	0.272189	2.78391	0.013306	0.368967	0.300306	-1.97984	-3.31899	0.00735635	0.273155	0.188611	1.00391	0.0331224	0.9742	0.991585	0.990085	-4.20538	-12.7879	1.86991e-07	3.32069e-05	1.95426e-05	-2.11584	-3.08295	0.0102766	0.0525102	0.0345991	9.22563	8.90175	9.1826	7.24466	7.4418	8.71622	8.53344	7.10272	6.84258	6.76041	7.36687
110911_at	110911	8760	Cds2	CDP-diacylglycerol synthase (phosphatidate cytidylyltransferase) 2	GO:0004605: phosphatidate cytidylyltransferase activity, GO:0005739: mitochondrion, GO:0005743: mitochondrial inner membrane, GO:0005783: endoplasmic reticulum, GO:0005783: endoplasmic reticulum, GO:0007602: phototransduction, GO:0008654: phospholipid biosynthetic process, GO:0016020: membrane, GO:0016021: integral to membrane, GO:0016740: transferase activity, GO:0016772: transferase activity, t…	00564: Glycerophospholipid metabolism, 01100: Metabolic pathways, 04070: Phosphatidylinositol signaling system	-0.118006	0.907457	0.931591	0.926698	-1.81807	0.086858	0.424538	0.355533	2.78306	0.0133291	0.369124	0.300306	-1.40895	-3.03965	0.0119363	0.309215	0.220777	1.02862	0.346331	0.73595	0.903485	0.893802	-1.23601	-2.54156	0.0296105	0.0759347	0.0584099	1.17254	1.55952	0.146821	0.302992	0.248396	6.77049	6.77173	6.8874	6.04925	6.16005	6.65385	6.32785	6.69664	6.56503	6.31468	6.41525
353211_at	353211	158471	Prune2	prune homolog 2 (Drosophila)	GO:0003674: molecular_function, GO:0005575: cellular_component, GO:0005737: cytoplasm, GO:0006915: apoptotic process, GO:0006917: induction of apoptosis, GO:0008152: metabolic process, GO:0016462: pyrophosphatase activity		-1.70814	0.105947	0.171671	0.150973	-2.19803	0.0422039	0.332124	0.262386	2.78263	0.0133411	0.369124	0.300306	-2.186	-3.76072	0.00346561	0.228645	0.149815	-1.05038	-0.0277289	0.9784	0.992739	0.991568	-2.09208	-4.50616	0.0011771	0.00754092	0.00474655	-1.00526	0.40047	0.696385	0.808069	0.778696	8.44352	8.49425	8.3645	6.71786	6.33267	7.98071	7.60626	7.3144	7.26185	6.6182	7.97079
242838_at	242838	401387	4932412H11Rik	RIKEN cDNA 4932412H11 gene	GO:0003674: molecular_function, GO:0005575: cellular_component, GO:0008150: biological_process		-0.712287	0.486024	0.575777		-0.346463	0.733279	0.903728		2.77981	0.0134187	0.369124		-1.33349	-1.97363	0.0755491	0.535222		1.1781	2.07388	0.0636095	0.447955		-1.37874	-2.34465	0.0413862	0.0967979		1.13943	1.50543	0.160038	0.320406		2.37211	1.90451	1.61936	1.86362	1.55907	1.48648	1.38067	1.4624	1.81026	1.55007	1.26732
218215_at	218215	255488	Rnf144b	ring finger protein 144B	GO:0004842: ubiquitin-protein ligase activity, GO:0005737: cytoplasm, GO:0005739: mitochondrion, GO:0006915: apoptotic process, GO:0008152: metabolic process, GO:0008270: zinc ion binding, GO:0016020: membrane, GO:0016021: integral to membrane, GO:0016874: ligase activity, GO:0031966: mitochondrial membrane, GO:0042787: protein ubiquitination involved in ubiquitin-dependent protein catabolic proc…		0.361978	0.721864	0.782728	0.769981	-0.419808	0.679924	0.88095	0.851498	2.77974	0.0134206	0.369124	0.30053	-1.42285	-2.5002	0.0305906	0.409368	0.302523	1.22626	1.64586	0.129432	0.524944	0.475861	-1.28742	-1.93536	0.0821596	0.159675	0.133929	1.35526	2.30681	0.0412609	0.132487	0.0962365	5.86632	6.03286	6.13344	5.20478	4.99658	5.81627	5.82414	6.02398	5.58355	5.02944	5.78782
100316771_at	100316771		Mir1196	microRNA 1196			-1.3024	0.210283	0.295386	0.271862	-3.01869	0.0077917	0.187546	0.133082	2.77891	0.0134434	0.369124	0.30053	-1.64951	-3.66577	0.00406762	0.241022	0.159206	-1.07725	-1.03221	0.325217	0.680566	0.646913	-1.43168	-3.55609	0.00534236	0.0221551	0.014995	1.06952	0.696566	0.500355	0.661454	0.61698	4.90056	4.98798	4.47579	4.13673	4.43907	3.90633	3.75539	4.40772	4.27786	4.27786	4.17566
100124344_at	100124344		Traj44	T cell receptor alpha joining 44			-4.80968	0.000166964	0.00101851	0.000629735	-2.08396	0.0526898	0.357689	0.287565	2.77867	0.0134501	0.369124	0.30053	-2.11779	-3.12563	0.0102791	0.29376	0.208579	1.01709	0.152886	0.881393	0.961258	0.95757	-3.71706	-8.57308	7.07939e-06	0.000259978	0.000153671	-1.72566	-2.16641	0.0528142	0.155791	0.115621	6.41933	5.699	6.65655	4.84481	4.15033	5.79675	5.58562	4.64282	4.46673	4.37379	4.14543
20975_at	20975	8871	Synj2	synaptojanin 2	GO:0000166: nucleotide binding, GO:0003676: nucleic acid binding, GO:0003723: RNA binding, GO:0004439: phosphatidylinositol-4,5-bisphosphate 5-phosphatase activity, GO:0004445: inositol-polyphosphate 5-phosphatase activity, GO:0005737: cytoplasm, GO:0005881: cytoplasmic microtubule, GO:0016020: membrane, GO:0016787: hydrolase activity, GO:0017124: SH3 domain binding, GO:0030165: PDZ domain bindin…	00562: Inositol phosphate metabolism, 01100: Metabolic pathways, 04070: Phosphatidylinositol signaling system	-8.72309	1.17253e-07	3.43295e-06	2.03689e-06	-1.11085	0.28222	0.645333	0.587274	2.77859	0.0134523	0.369124	0.30053	-1.40969	-3.11904	0.0103975	0.296008	0.210131	1.12225	0.894383	0.391205	0.724017	0.692794	-2.95187	-12.0007	3.37691e-07	4.70267e-05	2.76757e-05	-1.86587	-5.02555	0.000372289	0.00543051	0.00329311	6.7199	6.53553	6.60177	6.34509	5.93401	6.28141	5.88484	4.83644	5.26892	5.13849	4.9558
68118_at	68118	60673	9430023L20Rik	RIKEN cDNA 9430023L20 gene	GO:0003674: molecular_function, GO:0005575: cellular_component, GO:0005737: cytoplasm, GO:0006914: autophagy, GO:0008150: biological_process		-6.14375	1.1199e-05	0.00011364	6.84207e-05	-0.75706	0.45946	0.764514	0.720377	2.77483	0.0135569	0.369713	0.301156	-1.20636	-2.02766	0.0689687	0.524412	0.413033	1.08357	1.20265	0.255594	0.633011	0.593886	-1.63718	-6.48233	7.56941e-05	0.00112763	0.000677638	-1.25246	-2.88458	0.0146794	0.0669338	0.0448886	6.0967	5.99577	5.9042	5.72293	5.78275	5.67002	5.7435	5.35606	5.37219	5.20071	5.2221
101772_at	101772	55107	Ano1	anoctamin 1, calcium activated chloride channel	GO:0005216: ion channel activity, GO:0005229: intracellular calcium activated chloride channel activity, GO:0005254: chloride channel activity, GO:0005737: cytoplasm, GO:0005886: plasma membrane, GO:0006810: transport, GO:0006811: ion transport, GO:0006821: chloride transport, GO:0007275: multicellular organismal development, GO:0016020: membrane, GO:0016021: integral to membrane, GO:0034220: ion…		8.02323	3.70587e-07	8.22998e-06	4.89083e-06	-3.02726	0.00765085	0.187024	0.132921	2.77188	0.0136394	0.371269	0.302432	-2.06366	-4.78264	0.000663717	0.162341	0.10133	-1.1102	-0.798733	0.442179	0.753835	0.726189	2.07042	5.45499	0.00029444	0.00282192	0.00171687	3.84855	8.66907	2.7707e-06	0.000257595	0.000152708	6.13914	6.55082	5.95784	4.94879	4.79528	5.62125	5.26298	7.40864	6.99518	7.0281	7.6218
75079_at	75079	166793	Zbtb49	zinc finger and BTB domain containing 49	GO:0003676: nucleic acid binding, GO:0003677: DNA binding, GO:0005622: intracellular, GO:0005634: nucleus, GO:0006351: transcription, DNA-dependent, GO:0006355: regulation of transcription, DNA-dependent, GO:0008150: biological_process, GO:0008270: zinc ion binding, GO:0046872: metal ion binding		0.627479	0.538748	0.623808	0.606311	-0.37957	0.709001	0.893957	0.867408	2.76755	0.0137613	0.373778	0.304064	-1.28469	-2.14973	0.0560401	0.490968	0.379324	1.16229	1.66295	0.125917	0.520673	0.471942	-1.17599	-1.53284	0.156792	0.255766	0.226493	1.26972	2.41779	0.0338893	0.116141	0.0830621	4.53945	4.96625	4.77155	4.42304	4.66597	4.31721	4.18222	4.78557	4.62223	4.38905	4.29396
18596_at	18596	5159	Pdgfrb	platelet derived growth factor receptor, beta polypeptide	GO:0000166: nucleotide binding, GO:0001701: in utero embryonic development, GO:0001822: kidney development, GO:0001894: tissue homeostasis, GO:0004672: protein kinase activity, GO:0004713: protein tyrosine kinase activity, GO:0004714: transmembrane receptor protein tyrosine kinase activity, GO:0004871: signal transducer activity, GO:0005017: platelet-derived growth factor-activated receptor activ…	04010: MAPK signaling pathway, 04020: Calcium signaling pathway, 04060: Cytokine-cytokine receptor interaction, 04510: Focal adhesion, 04540: Gap junction, 04810: Regulation of actin cytoskeleton, 05200: Pathways in cancer, 05214: Glioma, 05215: Prostate cancer, 05218: Melanoma	6.75473	3.50912e-06	4.69485e-05	2.81223e-05	-3.69343	0.00182387	0.112678	0.0768615	2.7657	0.0138139	0.374232	0.304064	-1.73832	-4.23987	0.0015696	0.184371	0.120553	-1.15181	-1.72645	0.113593	0.506549	0.457554	1.48452	4.7069	0.000868579	0.00605958	0.00377148	2.24045	6.63798	3.45676e-05	0.00117745	0.000705331	6.21133	6.10523	6.19135	4.85064	5.30058	5.65266	5.5582	6.72646	6.85072	6.51199	6.84546
216225_at	216225	160728	Slc5a8	solute carrier family 5 (iodide transporter), member 8	GO:0005215: transporter activity, GO:0005886: plasma membrane, GO:0006810: transport, GO:0006811: ion transport, GO:0006814: sodium ion transport, GO:0006915: apoptotic process, GO:0015293: symporter activity, GO:0016020: membrane, GO:0016021: integral to membrane, GO:0055085: transmembrane transport		-3.82761	0.00136435	0.00556919	0.00367576	4.85614	0.000151445	0.03521	0.0219934	2.76539	0.0138225	0.374232	0.304064	1.52514	2.65645	0.0232956	0.3729	0.272374	4.01761	5.70888	0.000164332	0.0422668	0.0267879	-3.29221	-7.37963	2.5802e-05	0.00056572	0.000337035	-1.24977	-1.37364	0.19657	0.365637	0.309644	4.30137	5.08412	5.0618	5.56877	5.02713	5.78002	5.39144	3.41216	2.79708	2.8374	3.39333
94254_at	94254	81554	Wbscr16	Williams-Beuren syndrome chromosome region 16 homolog (human)	GO:0005087: Ran guanyl-nucleotide exchange factor activity, GO:0005739: mitochondrion		0.618287	0.544646	0.629149	0.611849	-1.90255	0.074314	0.403566	0.333024	2.76486	0.0138377	0.374241	0.304064	-1.32416	-2.7923	0.0183754	0.344965	0.250968	1.01722	0.236079	0.817924	0.936352	0.931064	-1.13013	-1.46425	0.174308	0.275893	0.246185	1.19186	2.10646	0.058634	0.166978	0.125148	5.29103	5.36196	5.59419	4.92531	4.92923	5.10093	5.1003	5.19558	5.36205	5.1599	5.25477
258541_at	258541		Olfr800	olfactory receptor 800	GO:0004871: signal transducer activity, GO:0004930: G-protein coupled receptor activity, GO:0004984: olfactory receptor activity, GO:0007165: signal transduction, GO:0007186: G-protein coupled receptor signaling pathway, GO:0007608: sensory perception of smell, GO:0016021: integral to membrane, GO:0050911: detection of chemical stimulus involved in sensory perception of smell	04740: Olfactory transduction	-1.13597	0.271854	0.362534		-0.523105	0.607706	0.846382		2.76317	0.0138858	0.374298		-1.27596	-2.28681	0.0442847	0.457303		1.1527	1.42627	0.182908	0.574865		-1.34373	-3.50961	0.00576904	0.0233936		1.09457	0.768507	0.458173	0.625031		1.47635	1.41703	1.14004	1.18492	0.998032	0.965497	0.829795	0.812819	0.94867	0.974257	0.960563
20208_at	20208	6288	Saa1	serum amyloid A 1	GO:0001664: G-protein coupled receptor binding, GO:0005515: protein binding, GO:0005576: extracellular region, GO:0005615: extracellular space, GO:0006953: acute-phase response, GO:0007204: elevation of cytosolic calcium ion concentration, GO:0008203: cholesterol metabolic process, GO:0034364: high-density lipoprotein particle, GO:0045785: positive regulation of cell adhesion, GO:0048246: macroph…		3.94292	0.00106336	0.00456222	0.00297733	1.85762	0.0807701	0.414473	0.344767	2.76189	0.0139223	0.374298	0.304064	-1.10503	-0.727376	0.483033	0.859597	0.811474	2.84471	3.38937	0.00646195	0.26848	0.214498	1.40095	2.24343	0.0491158	0.109607	0.0881103	4.40389	4.70729	0.000621333	0.00769977	0.00471209	1.19577	1.74848	1.32625	0.411523	0.981756	1.68093	1.73657	2.08711	1.40406	1.82628	2.26225
101706_at	101706	4926	Numa1	nuclear mitotic apparatus protein 1	GO:0000132: establishment of mitotic spindle orientation, GO:0000922: spindle pole, GO:0005623: cell, GO:0005634: nucleus, GO:0005737: cytoplasm, GO:0005876: spindle microtubule, GO:0008017: microtubule binding, GO:0015631: tubulin binding, GO:0016363: nuclear matrix, GO:0030425: dendrite, GO:0043025: neuronal cell body, GO:0045177: apical part of cell, GO:0060487: lung epithelial cell differenti…		-2.46725	0.0246297	0.0545964	0.043115	-1.39416	0.181366	0.5498	0.482494	2.76149	0.0139339	0.374298	0.304064	-1.29103	-2.59339	0.0260056	0.38922	0.284135	1.05276	0.681776	0.510174	0.792409	0.768476	-1.38829	-4.22591	0.00181644	0.0102199	0.00654323	-1.02145	-0.227815	0.823918	0.893388	0.875	7.58877	7.483	7.63022	7.10028	7.3482	7.03291	7.29536	7.1783	7.19495	6.94599	7.04793
93842_at	93842	57549	Igsf9	immunoglobulin superfamily, member 9	GO:0003674: molecular_function, GO:0005886: plasma membrane, GO:0007275: multicellular organismal development, GO:0007399: nervous system development, GO:0016020: membrane, GO:0016021: integral to membrane, GO:0016358: dendrite development, GO:0030054: cell junction, GO:0030154: cell differentiation, GO:0030425: dendrite, GO:0045202: synapse		-4.38391	0.00041191	0.00211415	0.00133587	-3.8369	0.0013372	0.100038	0.0662843	2.76036	0.0139662	0.374502	0.304064	-1.64211	-4.5194	0.00100246	0.1767	0.113515	-1.14169	-1.54818	0.15124	0.54494	0.497939	-1.71299	-5.56182	0.000253942	0.0025395	0.00154477	-1.19098	-1.84208	0.0922272	0.224109	0.17506	5.03937	4.66961	4.85662	3.94888	4.16043	4.0859	4.3635	3.83002	4.19645	4.23321	4.05264
18971_at	18971	5424	Pold1	polymerase (DNA directed), delta 1, catalytic subunit	GO:0000084: S phase of mitotic cell cycle, GO:0000084: S phase of mitotic cell cycle, GO:0000109: nucleotide-excision repair complex, GO:0000166: nucleotide binding, GO:0000731: DNA synthesis involved in DNA repair, GO:0003676: nucleic acid binding, GO:0003677: DNA binding, GO:0003682: chromatin binding, GO:0003887: DNA-directed DNA polymerase activity, GO:0003887: DNA-directed DNA polymerase act…	00230: Purine metabolism, 00240: Pyrimidine metabolism, 01100: Metabolic pathways, 03030: DNA replication, 03410: Base excision repair, 03420: Nucleotide excision repair, 03430: Mismatch repair, 03440: Homologous recombination	5.9549	1.61951e-05	0.000152603	9.21865e-05	-3.33026	0.00399698	0.152648	0.106988	2.75872	0.0140135	0.374719	0.304064	-1.59952	-3.83546	0.00305727	0.220082	0.143912	-1.09889	-1.2752	0.229797	0.61187	0.570849	1.30559	2.7355	0.0212741	0.0599866	0.044856	1.90039	6.85502	2.57865e-05	0.000974473	0.000581332	5.07147	4.9117	4.55916	4.37033	4.07782	3.93872	4.31239	5.06405	5.28543	5.23559	5.38683
66355_at	66355	2766	Gmpr	guanosine monophosphate reductase	GO:0003824: catalytic activity, GO:0003920: GMP reductase activity, GO:0005575: cellular_component, GO:0009117: nucleotide metabolic process, GO:0016491: oxidoreductase activity, GO:0046872: metal ion binding, GO:0055114: oxidation-reduction process	00230: Purine metabolism	-5.14487	8.30128e-05	0.000578176	0.000353854	-1.2394	0.232167	0.600941	0.539943	2.75847	0.0140205	0.374719	0.304064	-1.38974	-2.86691	0.0161309	0.336158	0.243177	1.08349	0.848914	0.414909	0.738991	0.708798	-1.99446	-7.16175	3.32157e-05	0.000665006	0.00039736	-1.32454	-2.38844	0.0357041	0.120299	0.0864005	5.95645	5.92718	5.98693	5.17171	5.28133	5.60542	5.78619	5.23766	5.03889	4.69939	4.80764
100217418_at	100217418		Snora44	small nucleolar RNA, H/ACA box 44	GO:0003674: molecular_function, GO:0005575: cellular_component, GO:0008150: biological_process		-0.56512	0.579432	0.66015	0.643024	0.0211011	0.983413	0.995166	0.994192	2.7575	0.0140486	0.374719	0.304229	-1.28949	-1.69102	0.120509	0.605024	0.498431	1.28787	2.93095	0.0143377	0.337591	0.283958	-1.4303	-3.66747	0.00444833	0.0194223	0.0129972	1.16108	1.22115	0.247252	0.422868	0.367104	9.05712	8.76696	9.20136	8.27813	8.10112	9.07478	8.92386	8.67989	8.46877	8.31275	8.52773
69221_at	69221		2410006H16Rik	RIKEN cDNA 2410006H16 gene	GO:0003674: molecular_function, GO:0005575: cellular_component, GO:0008150: biological_process		-2.72905	0.0143537	0.0356276	0.0270103	-1.11843	0.27906	0.642374	0.584027	2.75412	0.0141465	0.376533	0.305112	-1.50566	-2.81503	0.0176602	0.340615	0.247085	1.11056	1.06266	0.311822	0.673244	0.638046	-1.84509	-4.85062	0.000701197	0.00519224	0.00321333	-1.10344	-0.497581	0.628458	0.759879	0.724601	8.12671	7.89388	7.83457	6.78756	7.28467	7.85115	7.34853	7.57424	6.85303	6.9191	6.80231
17178_at	17178	5349	Fxyd3	FXYD domain-containing ion transport regulator 3	GO:0005216: ion channel activity, GO:0005254: chloride channel activity, GO:0005515: protein binding, GO:0005789: endoplasmic reticulum membrane, GO:0006810: transport, GO:0006811: ion transport, GO:0006821: chloride transport, GO:0016020: membrane, GO:0016021: integral to membrane, GO:0034220: ion transmembrane transport, GO:0034707: chloride channel complex, GO:0050790: regulation of catalytic …		-14.6954	4.81376e-11	1.71374e-08	1.00856e-08	2.78419	0.0127898	0.220148	0.162088	2.75301	0.0141786	0.37666	0.305112	1.03894	0.192252	0.851243	0.97531	0.962207	1.56064	5.0181	0.000454215	0.0773577	0.0499098	-4.72982	-16.4629	1.72274e-08	9.38034e-06	5.52043e-06	-3.14869	-9.86442	7.66543e-07	0.000131439	7.7353e-05	7.92234	8.11356	8.17561	8.41223	8.31307	7.78642	7.91138	5.83324	6.09847	5.65341	5.70325
100502732_at	100502732		Gm19343	predicted gene, 19343			-4.18279	0.000634022	0.00299778		-1.14906	0.266564	0.630558		2.74987	0.0142705	0.376827		-1.24921	-2.37438	0.0380626	0.441237		1.05871	0.854003	0.412208	0.73694		-1.4995	-4.86693	0.000684497	0.00509853		-1.13379	-1.57957	0.14217	0.296625		3.05175	3.11104	3.19412	2.90969	2.76237	2.67786	2.83639	2.65312	2.65666	2.48559	2.32116
672511_at	672511	57674	Rnf213	ring finger protein 213	GO:0000166: nucleotide binding, GO:0004842: ubiquitin-protein ligase activity, GO:0005737: cytoplasm, GO:0006200: ATP catabolic process, GO:0008152: metabolic process, GO:0008270: zinc ion binding, GO:0016567: protein ubiquitination, GO:0016874: ligase activity, GO:0016887: ATPase activity, GO:0017111: nucleoside-triphosphatase activity, GO:0046872: metal ion binding, GO:0051865: protein autoubiq…		-6.79089	3.28141e-06	4.43969e-05	2.65847e-05	4.88811	0.00014163	0.03521	0.0219934	2.74865	0.0143061	0.376827	0.305248	1.28094	1.98117	0.0745969	0.534138	0.423611	2.20563	6.32735	6.99726e-05	0.028697	0.0177472	-2.78365	-9.48255	2.89462e-06	0.000158932	9.39417e-05	-1.61663	-3.71914	0.00331735	0.0241979	0.0152825	8.59377	7.9399	8.31563	8.76051	8.38616	8.6214	8.84962	6.72157	6.91071	6.80831	6.87476
100502582_at	100502582		Gm10923	ribosomal protein L23A pseudogene	GO:0003674: molecular_function, GO:0005575: cellular_component, GO:0008150: biological_process		0.722537	0.479864	0.569949	0.550101	-0.45788	0.652882	0.869287	0.836383	2.74844	0.0143124	0.376827	0.305248	-1.36803	-2.42527	0.0348467	0.429152	0.319281	1.20246	1.54799	0.151288	0.54494	0.497939	-1.20885	-1.63131	0.134353	0.228278	0.199638	1.36079	2.44454	0.0323132	0.112672	0.0802788	4.58474	4.39641	4.89078	3.9145	4.5074	3.98855	4.25786	4.38609	4.58113	4.44121	3.98619
210622_at	210622	25891	Pamr1	peptidase domain containing associated with muscle regeneration 1	GO:0003824: catalytic activity, GO:0004252: serine-type endopeptidase activity, GO:0005576: extracellular region, GO:0006508: proteolysis		-2.58527	0.0193417	0.0451413	0.0349938	-1.73125	0.101655	0.452149	0.383704	2.74529	0.0144053	0.377411	0.305705	-2.40619	-2.95844	0.01375	0.31855	0.226883	1.09544	0.712529	0.491704	0.781647	0.757444	-3.76956	-7.55263	2.11939e-05	0.000504927	0.000300564	-1.43012	-0.338206	0.741498	0.839858	0.813865	7.25302	6.60859	7.33161	4.1052	4.73505	6.80646	6.17164	5.61017	4.89132	4.61376	5.40729
171271_at	171271		Vmn1r220	vomeronasal 1 receptor 220	GO:0005550: pheromone binding, GO:0005887: integral to plasma membrane, GO:0016503: pheromone receptor activity, GO:0019236: response to pheromone		1.74739	0.0987504	0.162316		0.611142	0.549254	0.815842		2.74502	0.0144131	0.377411		-1.18509	-1.77255	0.105519	0.583396		1.29608	2.12406	0.0583924	0.439848		-1.06419	-0.729106	0.482919	0.590208		1.44334	3.04988	0.0109054	0.054757		1.17046	0.971984	1.01466	0.81995	0.836145	0.667989	0.905334	0.810738	0.944732	0.815769	1.24488
258752_at	258752		Olfr583	olfactory receptor 583	GO:0004871: signal transducer activity, GO:0004930: G-protein coupled receptor activity, GO:0004984: olfactory receptor activity, GO:0007165: signal transduction, GO:0007186: G-protein coupled receptor signaling pathway, GO:0007608: sensory perception of smell, GO:0016021: integral to membrane, GO:0050911: detection of chemical stimulus involved in sensory perception of smell	04740: Olfactory transduction	-1.76828	0.0950955	0.157667		-0.697473	0.49501	0.785768		2.74414	0.0144393	0.377411		-1.22034	-1.91786	0.0829527	0.54865		1.09629	1.48446	0.167144	0.560275		-1.31101	-3.52068	0.00566429	0.0230504		1.02047	0.273542	0.789443	0.871641		0.75359	0.909666	1.03327	0.44327	0.676838	0.802531	0.514336	0.475043	0.50815	0.512184	0.554242
100861855_at	100861855		LOC100861855	uncharacterized LOC100861855			-0.984121	0.338963	0.432187		-0.537155	0.598176	0.841578		2.7428	0.0144789	0.377411		-1.24985	-1.86157	0.091106	0.562296		1.12165	1.85039	0.0926366	0.486569		-1.2954	-2.63776	0.0251322	0.0674288		1.08222	0.965896	0.354603	0.53257		2.5714	2.89765	3.08929	2.45064	2.39031	2.5586	2.759	2.44738	2.49143	2.44187	2.59388
69419_at	69419		1700026F02Rik	RIKEN cDNA 1700026F02 gene			-4.16252	0.000662279	0.00310806	0.0019968	-1.11754	0.279431	0.642875	0.58439	2.74066	0.0145427	0.377629	0.305969	-1.39108	-2.54474	0.0283074	0.400627	0.293645	1.09853	1.04143	0.321119	0.677836	0.643886	-1.81203	-5.12358	0.000470791	0.0039074	0.00239496	-1.18577	-1.83016	0.0940968	0.226908	0.177677	3.93121	3.29929	3.83985	3.17864	3.10479	3.39723	3.26135	2.92076	2.86691	2.96794	2.65838
66835_at	66835		Snord123	small nucleolar RNA, C/D box 123			-0.725025	0.478375	0.568716	0.548733	0.050418	0.960382	0.986625	0.983376	2.74051	0.0145472	0.377629	0.305969	-1.3089	-1.82032	0.0975437	0.572675	0.466311	1.295	2.47538	0.0318128	0.394235	0.336661	-1.47927	-3.19532	0.00975141	0.0341713	0.0240486	1.14586	1.20233	0.254178	0.430449	0.374724	8.67008	8.45845	8.59294	7.70426	7.65126	8.65886	8.46289	8.44156	7.86686	7.55798	8.03729
[truncated: 24,631 more rows]
[truncated: 4 more columns]
